# Supplementary material for: Orbital-engineered anomalous Hall conductivity in stable full Heusler compounds: a pathway to optimized spintronics
Source: Royal Society of Chemistry journal article supplement (doi:10.1039/d4tc02116a), 2024-01-01
Supplement: d4tc02116a1.pdf [file d4tc02116a1.pdf]

### Supplementary Table: Detailed Dataset of Full Heusler Compounds

The table presents the Anomalous Hall Conductivity ( $|\sigma_{xy}|$  in S/cm) along with stability and magnetic characteristics for the full Heusler compounds  $X_2YZ$ . It includes the structure ID, energy difference between  $L2_1$  and  $X_a$  structures ( $\Delta E$  in eV), formation energy ( $\Delta F$  in eV/atom),  $|\sigma_{xy}|$  (S/cm), spin polarization (P in %), magnetic moment for X ( $M_X$ ), Y ( $M_Y$ ), and Z ( $M_Z$ ), total magnetic moment ( $M_{tot}$  in  $\mu_B$ ), and total valence electrons (Ne).

| ID   | Formula | X  | Y  | Z  | Structure | $\Delta E$ (eV) | $\Delta F$ (eV/atom) | a (Å) | $ \sigma_{xy} $ (S/cm) | P (%) | $M_{X1}$ ( $\mu_B$ ) | $M_{X2}$ ( $\mu_B$ ) | $M_Y$ ( $\mu_B$ ) | $M_Z$ ( $\mu_B$ ) | $M_{tot}$ ( $\mu_B$ ) | Ne |
|------|---------|----|----|----|-----------|-----------------|----------------------|-------|------------------------|-------|----------------------|----------------------|-------------------|-------------------|-----------------------|----|
| 1687 | Rh2MnGa | Rh | Mn | Ga | 121       | 2.078           | -0.569               | 6.040 | 1846.740               | 0.927 | 0.329                | 0.329                | 3.456             | -0.049            | 4.065                 | 28 |
| 1738 | Rh2PtAl | Rh | Pt | Al | 121       | 0.135           | -0.380               | 6.154 | 1817.589               | 0.337 | 0.393                | 0.393                | 0.156             | -0.009            | 0.933                 | 31 |
| 623  | Fe2IrIn | Fe | Ir | In | 121       | 0.162           | 0.171                | 6.164 | 1813.856               | 0.662 | 2.589                | 2.589                | 0.756             | -0.119            | 5.815                 | 28 |
| 1685 | Rh2MnB  | Rh | Mn | B  | 121       | 1.922           | -0.029               | 5.740 | 1765.115               | 0.900 | 0.360                | 0.360                | 3.235             | -0.002            | 3.953                 | 28 |
| 42   | Co2CoSb | Co | Co | Sb | xa        | 0.000           | 0.205                | 5.888 | 1754.870               | 0.874 | 1.493                | -0.016               | -0.015            | -0.001            | 1.461                 | 32 |
| 1683 | Rh2MnAl | Rh | Mn | Al | 121       | 2.177           | -0.708               | 6.021 | 1726.299               | 0.833 | 0.338                | 0.338                | 3.418             | -0.019            | 4.075                 | 28 |
| 100  | Co2MnAl | Co | Mn | Al | 121       | 1.488           | -0.385               | 5.685 | 1646.533               | 0.630 | 0.737                | 0.737                | 2.704             | -0.043            | 4.135                 | 28 |
| 1038 | Mn2ZnBi | Mn | Zn | Bi | 121       | 0.187           | 0.359                | 6.548 | 1636.593               | 0.636 | 3.306                | 3.306                | -0.069            | -0.130            | 6.413                 | 21 |
| 624  | Fe2IrPb | Fe | Ir | Pb | 121       | 0.189           | 0.481                | 6.253 | 1612.025               | 0.632 | 2.457                | 2.457                | 0.643             | -0.111            | 5.446                 | 29 |
| 711  | Fe2RuIn | Fe | Ru | In | 121       | 0.194           | 0.259                | 6.145 | 1532.512               | 0.490 | 2.580                | 2.580                | 1.191             | -0.152            | 6.199                 | 27 |
| 2075 | Ru2WPb  | Ru | W  | Pb | 121       | 0.878           | 0.593                | 6.428 | 1447.035               | 0.622 | 0.507                | 0.507                | 0.594             | 0.000             | 1.608                 | 26 |
| 818  | Mn2CdBi | Mn | Cd | Bi | 121       | 0.314           | 0.384                | 6.815 | 1444.265               | 0.556 | 3.566                | 3.566                | -0.050            | -0.134            | 6.948                 | 21 |
| 1742 | Rh2PtGa | Rh | Pt | Ga | 121       | 0.229           | -0.245               | 6.166 | 1420.018               | 0.249 | 0.332                | 0.332                | 0.123             | -0.016            | 0.771                 | 31 |
| 1744 | Rh2PtIn | Rh | Pt | In | 121       | 0.234           | -0.145               | 6.345 | 1329.230               | 0.354 | 0.388                | 0.388                | 0.155             | -0.024            | 0.907                 | 31 |
| 2540 | Ti2PtSn | Ti | Pt | Sn | 121       | 0.268           | -0.428               | 6.572 | 1319.305               | 0.485 | 0.815                | 0.815                | 0.141             | 0.020             | 1.791                 | 22 |
| 629  | Fe2MnAs | Fe | Mn | As | 121       | 0.301           | 0.025                | 5.731 | 1317.665               | 0.159 | -1.089               | -1.089               | 2.862             | 0.043             | 0.727                 | 28 |
| 807  | Mn2AuBi | Mn | Au | Bi | 121       | 0.256           | 0.221                | 6.685 | 1315.027               | 0.617 | 3.640                | 3.640                | 0.026             | -0.138            | 7.168                 | 20 |
| 1968 | Ru2MoSn | Ru | Mo | Sn | 121       | 0.662           | 0.146                | 6.336 | 1303.217               | 0.821 | 0.388                | 0.388                | 0.916             | -0.016            | 1.676                 | 26 |
| 991  | Mn2TiAl | Mn | Ti | Al | 121       | 1.028           | -0.397               | 5.946 | 1267.171               | 0.814 | 1.842                | 1.842                | -0.632            | -0.041            | 3.011                 | 21 |
| 995  | Mn2TiGa | Mn | Ti | Ga | 121       | 0.860           | -0.344               | 5.939 | 1264.316               | 0.795 | 1.861                | 1.861                | -0.675            | -0.086            | 2.961                 | 21 |

|      |         |    |    |    |     |        |        |       |          |       |        |        |        |        |       |    |
|------|---------|----|----|----|-----|--------|--------|-------|----------|-------|--------|--------|--------|--------|-------|----|
| 1939 | Ru2IrBi | Ru | Ir | Bi | 121 | 0.388  | 0.600  | 6.434 | 1244.673 | 0.168 | 0.623  | 0.623  | 0.330  | -0.025 | 1.551 | 30 |
| 1651 | Rh2FeAs | Rh | Fe | As | 121 | 0.378  | -0.054 | 6.080 | 1236.331 | 0.456 | 0.344  | 0.344  | 3.036  | 0.009  | 3.733 | 31 |
| 2196 | Sc2HfPb | Sc | Hf | Pb | 121 | 0.152  | 0.023  | 7.172 | 1217.187 | 0.228 | 0.194  | 0.194  | 0.552  | -0.031 | 0.909 | 14 |
| 689  | Fe2PtIn | Fe | Pt | In | 121 | 0.113  | 0.073  | 6.204 | 1210.237 | 0.739 | 2.609  | 2.609  | 0.318  | -0.153 | 5.383 | 29 |
| 2019 | Ru2RhIn | Ru | Rh | In | xa  | -0.030 | 0.273  | 6.293 | 1204.463 | 0.062 | 0.580  | -0.138 | -0.026 | 0.011  | 0.427 | 28 |
| 1731 | Rh2PdGa | Rh | Pd | Ga | 121 | 0.199  | -0.255 | 6.140 | 1198.046 | 0.273 | 0.489  | 0.489  | 0.214  | -0.029 | 1.163 | 31 |
| 1628 | Rh2CrAl | Rh | Cr | Al | 121 | 1.618  | -0.524 | 6.027 | 1194.707 | 0.946 | 0.186  | 0.186  | 2.586  | -0.014 | 2.944 | 27 |
| 1689 | Rh2MnIn | Rh | Mn | In | 121 | 1.317  | -0.378 | 6.276 | 1132.729 | 0.792 | 0.316  | 0.316  | 3.706  | -0.072 | 4.266 | 28 |
| 884  | Mn2IrBi | Mn | Ir | Bi | xa  | -0.282 | 0.227  | 6.499 | 1114.157 | 0.062 | -3.634 | 3.619  | 0.070  | 0.004  | 0.059 | 28 |
| 684  | Fe2PtAs | Fe | Pt | As | 121 | 0.519  | 0.052  | 6.027 | 1082.615 | 0.444 | 2.371  | 2.371  | 0.261  | -0.071 | 4.932 | 31 |
| 227  | Co2WIn  | Co | W  | In | 121 | 1.396  | 0.235  | 6.091 | 1078.536 | 0.566 | 0.856  | 0.856  | 0.119  | -0.005 | 1.826 | 27 |
| 1676 | Rh2IrGa | Rh | Ir | Ga | xa  | -0.137 | -0.076 | 6.134 | 1046.872 | 0.184 | 0.331  | 0.427  | 0.432  | -0.009 | 1.181 | 30 |
| 104  | Co2MnGa | Co | Mn | Ga | 121 | 1.081  | -0.268 | 5.704 | 1045.880 | 0.729 | 0.722  | 0.722  | 2.762  | -0.117 | 4.089 | 28 |
| 1280 | Ni2WBi  | Ni | W  | Bi | 121 | 0.138  | 0.683  | 6.306 | 1041.520 | 0.434 | 0.139  | 0.139  | 0.992  | 0.011  | 1.281 | 31 |
| 1733 | Rh2PdIn | Rh | Pd | In | 121 | 0.061  | -0.141 | 6.337 | 1040.598 | 0.330 | 0.595  | 0.595  | 0.297  | -0.042 | 1.445 | 31 |
| 2077 | Ru2WSi  | Ru | W  | Si | 121 | 0.602  | -0.020 | 6.089 | 1036.391 | 0.339 | 0.474  | 0.474  | 0.277  | 0.018  | 1.243 | 26 |
| 1963 | Ru2MoGe | Ru | Mo | Ge | 121 | 0.382  | 0.070  | 6.151 | 1028.291 | 0.641 | 0.371  | 0.371  | 0.804  | 0.010  | 1.556 | 26 |
| 1632 | Rh2CrGa | Rh | Cr | Ga | 121 | 1.412  | -0.392 | 6.044 | 1020.318 | 0.858 | 0.157  | 0.157  | 2.631  | -0.037 | 2.908 | 27 |
| 1657 | Rh2FePb | Rh | Fe | Pb | 121 | 0.696  | 0.085  | 6.341 | 1018.724 | 0.707 | 0.196  | 0.196  | 3.129  | -0.021 | 3.500 | 30 |
| 1727 | Rh2PdAl | Rh | Pd | Al | 121 | 0.171  | -0.378 | 6.127 | 1015.633 | 0.259 | 0.439  | 0.439  | 0.171  | -0.012 | 1.037 | 31 |
| 95   | Co2IrIn | Co | Ir | In | 121 | 0.495  | 0.162  | 6.089 | 1015.537 | 0.468 | 1.545  | 1.545  | 0.689  | -0.095 | 3.684 | 30 |
| 1944 | Ru2IrSb | Ru | Ir | Sb | 121 | 0.361  | 0.333  | 6.320 | 1007.850 | 0.226 | 0.594  | 0.594  | 0.321  | -0.015 | 1.494 | 30 |
| 1793 | Rh2VAl  | Rh | V  | Al | 121 | 1.562  | -0.638 | 6.048 | 1005.058 | 0.747 | 0.200  | 0.200  | 1.177  | -0.008 | 1.569 | 26 |
| 1729 | Rh2PdB  | Rh | Pd | B  | 121 | 0.434  | 0.432  | 5.883 | 1003.500 | 0.034 | 0.285  | 0.285  | 0.098  | -0.013 | 0.655 | 31 |
| 1915 | Ru2FeAs | Ru | Fe | As | 121 | 1.042  | 0.017  | 6.010 | 1002.456 | 0.754 | 0.534  | 0.534  | 3.024  | 0.021  | 4.113 | 29 |
| 2801 | V2PtPb  | V  | Pt | Pb | 121 | 0.128  | 0.204  | 6.498 | 996.496  | 0.038 | 1.816  | 1.816  | 0.051  | -0.027 | 3.656 | 24 |
| 558  | Fe2CdPb | Fe | Cd | Pb | 121 | 0.879  | 0.575  | 6.508 | 992.984  | 0.769 | 2.485  | 2.485  | -0.055 | -0.112 | 4.803 | 22 |
| 51   | Co2CrIn | Co | Cr | In | 121 | 0.767  | 0.260  | 5.963 | 985.857  | 0.415 | -0.770 | -0.770 | 2.487  | -0.021 | 0.926 | 27 |
| 1955 | Ru2MnSb | Ru | Mn | Sb | 121 | 1.642  | -0.125 | 6.228 | 973.422  | 0.951 | 0.205  | 0.205  | 3.500  | 0.006  | 3.916 | 28 |

|      |         |    |    |    |     |        |        |       |         |       |        |        |        |        |       |    |
|------|---------|----|----|----|-----|--------|--------|-------|---------|-------|--------|--------|--------|--------|-------|----|
| 1923 | Ru2FeSi | Ru | Fe | Si | l21 | 1.418  | -0.342 | 5.897 | 973.215 | 0.614 | 0.401  | 0.401  | 2.942  | 0.018  | 3.762 | 28 |
| 546  | Fe2AuIn | Fe | Au | In | l21 | 0.404  | 0.217  | 6.296 | 970.783 | 0.541 | 2.600  | 2.600  | 0.018  | -0.186 | 5.032 | 20 |
| 1990 | Ru2NiSn | Ru | Ni | Sn | l21 | 0.407  | 0.116  | 6.173 | 969.934 | 0.433 | 0.516  | 0.516  | 0.742  | -0.010 | 1.764 | 30 |
| 779  | Fe2ZnSb | Fe | Zn | Sb | l21 | 1.143  | 0.200  | 5.978 | 963.572 | 0.355 | 0.033  | 0.033  | -0.002 | -0.003 | 0.061 | 23 |
| 2    | Co2AgAs | Co | Ag | As | l21 | 0.903  | 0.284  | 5.986 | 953.485 | 0.745 | 1.072  | 1.072  | 0.012  | -0.003 | 2.153 | 24 |
| 535  | Fe2AgIn | Fe | Ag | In | l21 | 0.287  | 0.358  | 6.292 | 951.659 | 0.647 | 2.625  | 2.625  | 0.037  | -0.187 | 5.100 | 20 |
| 2073 | Ru2WGe  | Ru | W  | Ge | l21 | 0.581  | 0.148  | 6.171 | 949.710 | 0.275 | 0.486  | 0.486  | 0.349  | 0.020  | 1.341 | 26 |
| 1948 | Ru2MnAs | Ru | Mn | As | l21 | 1.640  | -0.133 | 6.026 | 947.502 | 0.905 | 0.204  | 0.204  | 3.341  | 0.036  | 3.785 | 28 |
| 22   | Co2AuSn | Co | Au | Sn | l21 | 0.758  | 0.137  | 6.178 | 941.143 | 0.679 | 0.980  | 0.980  | -0.002 | -0.083 | 1.875 | 23 |
| 4    | Co2AgBi | Co | Ag | Bi | l21 | 0.988  | 0.468  | 6.319 | 935.909 | 0.577 | 1.058  | 1.058  | 0.003  | -0.045 | 2.074 | 24 |
| 1945 | Ru2IrSi | Ru | Ir | Si | l21 | 0.296  | 0.072  | 6.058 | 934.929 | 0.085 | 0.187  | 0.187  | 0.240  | 0.001  | 0.615 | 29 |
| 225  | Co2WGa  | Co | W  | Ga | l21 | 0.811  | -0.026 | 5.882 | 934.709 | 0.586 | 0.835  | 0.835  | 0.119  | 0.009  | 1.798 | 27 |
| 2078 | Ru2WSn  | Ru | W  | Sn | l21 | 0.961  | 0.214  | 6.344 | 928.121 | 0.590 | 0.521  | 0.521  | 0.458  | 0.000  | 1.500 | 26 |
| 15   | Co2AuBi | Co | Au | Bi | l21 | 1.017  | 0.389  | 6.358 | 919.976 | 0.814 | 1.131  | 1.131  | -0.009 | -0.056 | 2.197 | 24 |
| 1634 | Rh2CrIn | Rh | Cr | In | l21 | 1.582  | -0.189 | 6.269 | 918.882 | 0.839 | 0.094  | 0.094  | 2.827  | -0.056 | 2.959 | 27 |
| 1672 | Rh2IrAl | Rh | Ir | Al | xa  | -0.176 | -0.234 | 6.123 | 916.717 | 0.058 | 0.544  | 0.519  | 0.581  | -0.004 | 1.640 | 30 |
| 2445 | Ti2FeBi | Ti | Fe | Bi | l21 | 0.310  | 0.103  | 6.542 | 914.692 | 0.875 | -0.531 | -0.531 | 2.350  | 0.027  | 1.315 | 21 |
| 1284 | Ni2WPb  | Ni | W  | Pb | l21 | 0.571  | 0.586  | 6.220 | 914.436 | 0.563 | 0.077  | 0.077  | 0.649  | -0.002 | 0.801 | 30 |
| 679  | Fe2PdPb | Fe | Pd | Pb | l21 | 0.205  | 0.341  | 6.309 | 913.389 | 0.562 | 2.598  | 2.598  | 0.140  | -0.162 | 5.174 | 30 |
| 90   | Co2IrAs | Co | Ir | As | xa  | -0.261 | 0.203  | 5.914 | 899.533 | 0.166 | 1.553  | -0.949 | 0.153  | -0.010 | 0.747 | 32 |
| 638  | Fe2MnSn | Fe | Mn | Sn | l21 | 0.703  | 0.101  | 5.945 | 899.222 | 0.946 | 0.078  | 0.078  | 2.891  | -0.055 | 2.992 | 27 |
| 2164 | Sc2CrSb | Sc | Cr | Sb | l21 | 0.326  | -0.167 | 6.910 | 898.662 | 0.174 | -0.284 | -0.284 | 3.427  | 0.018  | 2.877 | 17 |
| 1633 | Rh2CrGe | Rh | Cr | Ge | l21 | 1.069  | -0.280 | 6.072 | 897.011 | 0.701 | 0.366  | 0.366  | 2.972  | -0.001 | 3.703 | 28 |
| 68   | Co2FeAs | Co | Fe | As | xa  | -2.048 | -0.422 | 5.696 | 896.448 | 0.711 | 4.304  | 0.833  | 1.145  | 0.088  | 6.370 | 31 |
| 635  | Fe2MnPb | Fe | Mn | Pb | l21 | 0.433  | 0.481  | 6.160 | 891.609 | 0.314 | 1.812  | 1.812  | -3.410 | -0.062 | 0.152 | 27 |
| 2728 | V2IrAl  | V  | Ir | Al | xa  | -1.154 | -0.480 | 6.059 | 869.320 | 0.707 | -0.313 | 1.721  | 0.187  | 0.001  | 1.596 | 22 |
| 1767 | Rh2RuPb | Rh | Ru | Pb | xa  | -0.181 | 0.329  | 6.382 | 868.470 | 0.489 | 0.431  | 0.327  | 0.836  | -0.026 | 1.568 | 30 |
| 1718 | Rh2NiB  | Rh | Ni | B  | l21 | 1.405  | 0.137  | 5.654 | 867.745 | 0.247 | 0.458  | 0.458  | 0.727  | -0.021 | 1.622 | 31 |
| 949  | Mn2PtB  | Mn | Pt | B  | xa  | -1.180 | 0.126  | 5.670 | 867.433 | 0.145 | 3.027  | -1.181 | 0.212  | 0.081  | 2.139 | 27 |

|      |         |    |    |    |     |        |        |       |         |       |        |        |        |        |       |    |
|------|---------|----|----|----|-----|--------|--------|-------|---------|-------|--------|--------|--------|--------|-------|----|
| 591  | Fe2CuPb | Fe | Cu | Pb | xa  | -0.262 | 0.457  | 6.204 | 856.961 | 0.306 | 2.692  | 2.316  | 0.038  | -0.069 | 4.977 | 21 |
| 874  | Mn2HfGa | Mn | Hf | Ga | l21 | 1.049  | -0.250 | 6.104 | 853.945 | 0.846 | 1.699  | 1.699  | -0.299 | -0.101 | 2.998 | 21 |
| 766  | Fe2YIn  | Fe | Y  | In | l21 | 1.034  | 0.137  | 6.590 | 850.197 | 0.523 | 0.000  | 0.000  | 0.002  | 0.000  | 0.002 | 22 |
| 75   | Co2FeSb | Co | Fe | Sb | l21 | 0.484  | 0.141  | 5.972 | 843.831 | 0.346 | -0.052 | -0.052 | 2.874  | -0.005 | 2.765 | 31 |
| 917  | Mn2NbBi | Mn | Nb | Bi | l21 | 0.372  | 0.312  | 6.505 | 841.154 | 0.681 | 2.924  | 2.924  | -1.045 | -0.045 | 4.758 | 24 |
| 1638 | Rh2CrSn | Rh | Cr | Sn | l21 | 1.363  | -0.265 | 6.282 | 840.462 | 0.789 | 0.331  | 0.331  | 3.109  | -0.034 | 3.737 | 28 |
| 824  | Mn2CdSi | Mn | Cd | Si | l21 | 0.350  | 0.180  | 6.158 | 836.471 | 0.438 | 2.985  | 2.985  | -0.017 | -0.100 | 5.853 | 20 |
| 625  | Fe2IrSb | Fe | Ir | Sb | l21 | 0.069  | 0.228  | 6.115 | 836.191 | 0.566 | 1.984  | 1.984  | 0.495  | -0.068 | 4.395 | 30 |
| 685  | Fe2PtB  | Fe | Pt | B  | xa  | -0.474 | 0.358  | 5.657 | 833.414 | 0.324 | 2.289  | -2.216 | 0.099  | 0.066  | 0.238 | 29 |
| 1050 | Mn2ZrGa | Mn | Zr | Ga | l21 | 0.926  | -0.242 | 6.137 | 832.102 | 0.572 | 1.758  | 1.758  | -0.373 | -0.109 | 3.034 | 21 |
| 552  | Fe2CdAs | Fe | Cd | As | l21 | 0.991  | 0.388  | 6.174 | 832.035 | 0.663 | 2.290  | 2.290  | -0.062 | -0.054 | 4.464 | 23 |
| 1751 | Rh2RhB  | Rh | Rh | B  | l21 | 0.000  | 0.502  | 5.864 | 829.944 | 0.495 | 0.210  | 0.210  | 0.149  | -0.002 | 0.567 | 30 |
| 358  | Cr2IrGe | Cr | Ir | Ge | xa  | -0.929 | -0.067 | 5.994 | 825.944 | 0.974 | 2.453  | -1.573 | 0.065  | 0.020  | 0.965 | 25 |
| 601  | Fe2FeIn | Fe | Fe | In | xa  | 0.000  | 0.422  | 6.048 | 821.433 | 0.163 | -2.526 | 2.123  | 2.123  | -0.109 | 1.611 | 27 |
| 1637 | Rh2CrSi | Rh | Cr | Si | l21 | 1.121  | -0.417 | 5.979 | 818.596 | 0.622 | 0.388  | 0.388  | 2.917  | 0.002  | 3.695 | 28 |
| 691  | Fe2PtSb | Fe | Pt | Sb | l21 | 0.428  | 0.086  | 6.171 | 818.097 | 0.457 | 2.156  | 2.156  | 0.217  | -0.084 | 4.445 | 31 |
| 1048 | Mn2ZrB  | Mn | Zr | B  | l21 | 0.326  | 0.169  | 5.790 | 814.500 | 0.729 | 1.650  | 1.650  | -0.265 | -0.081 | 2.954 | 21 |
| 1946 | Ru2IrSn | Ru | Ir | Sn | l21 | 0.332  | 0.267  | 6.306 | 812.675 | 0.098 | 0.319  | 0.319  | 0.298  | -0.011 | 0.925 | 29 |
| 1917 | Ru2FeBi | Ru | Fe | Bi | l21 | 0.878  | 0.393  | 6.346 | 811.868 | 0.630 | 0.615  | 0.615  | 3.156  | -0.001 | 4.385 | 29 |
| 2403 | Ti2CdGe | Ti | Cd | Ge | l21 | 1.283  | -0.088 | 6.511 | 806.353 | 0.036 | 0.133  | 0.133  | 0.003  | 0.002  | 0.271 | 14 |
| 1950 | Ru2MnBi | Ru | Mn | Bi | l21 | 1.812  | 0.230  | 6.362 | 797.773 | 0.901 | 0.173  | 0.173  | 3.569  | -0.005 | 3.910 | 28 |
| 853  | Mn2CuGe | Mn | Cu | Ge | xa  | -0.104 | -0.044 | 5.922 | 788.917 | 0.429 | 3.142  | -2.600 | 0.011  | 0.036  | 0.589 | 19 |
| 45   | Co2CrAl | Co | Cr | Al | l21 | 0.444  | -0.569 | 5.695 | 782.886 | 0.305 | 0.841  | 0.841  | -1.421 | 0.010  | 0.271 | 27 |
| 79   | Co2HfAs | Co | Hf | As | l21 | 0.868  | -0.266 | 6.042 | 782.277 | 0.919 | 0.728  | 0.728  | -0.093 | 0.040  | 1.403 | 27 |
| 539  | Fe2AgSn | Fe | Ag | Sn | l21 | 0.453  | 0.321  | 6.273 | 781.609 | 0.744 | 2.464  | 2.464  | 0.052  | -0.150 | 4.830 | 21 |
| 221  | Co2WAl  | Co | W  | Al | l21 | 1.044  | -0.171 | 5.874 | 778.301 | 0.508 | 0.863  | 0.863  | 0.140  | 0.005  | 1.871 | 27 |
| 796  | Mn2AgBi | Mn | Ag | Bi | l21 | 0.156  | 0.333  | 6.661 | 778.278 | 0.662 | 3.562  | 3.562  | 0.027  | -0.117 | 7.034 | 20 |
| 896  | Mn2MnGa | Mn | Mn | Ga | xa  | 0.000  | -0.165 | 5.805 | 777.330 | 0.953 | -2.978 | 1.514  | 1.513  | -0.047 | 0.002 | 24 |
| 2802 | V2PtSb  | V  | Pt | Sb | l21 | 0.339  | -0.051 | 6.337 | 774.111 | 0.080 | 0.381  | 0.381  | -0.006 | -0.009 | 0.747 | 25 |

|      |         |    |    |    |     |        |        |       |         |       |        |        |        |        |       |    |
|------|---------|----|----|----|-----|--------|--------|-------|---------|-------|--------|--------|--------|--------|-------|----|
| 1941 | Ru2IrGe | Ru | Ir | Ge | l21 | 0.382  | 0.199  | 6.134 | 768.825 | 0.079 | 0.191  | 0.191  | 0.203  | 0.000  | 0.585 | 29 |
| 532  | Fe2AgBi | Fe | Ag | Bi | l21 | 0.729  | 0.546  | 6.460 | 766.778 | 0.903 | 2.552  | 2.552  | 0.042  | -0.091 | 5.055 | 22 |
| 1181 | Ni2NbBi | Ni | Nb | Bi | l21 | 0.381  | 0.235  | 6.357 | 759.234 | 0.388 | 0.019  | 0.019  | 0.212  | 0.008  | 0.258 | 30 |
| 587  | Fe2CuBi | Fe | Cu | Bi | l21 | 0.477  | 0.523  | 6.224 | 757.844 | 0.724 | 2.330  | 2.330  | 0.088  | -0.090 | 4.658 | 22 |
| 1635 | Rh2CrPb | Rh | Cr | Pb | l21 | 1.309  | 0.054  | 6.380 | 746.132 | 0.854 | 0.290  | 0.290  | 3.190  | -0.033 | 3.737 | 28 |
| 2408 | Ti2CdSn | Ti | Cd | Sn | l21 | 0.962  | -0.029 | 6.734 | 744.495 | 0.118 | 0.202  | 0.202  | 0.005  | 0.007  | 0.416 | 14 |
| 1046 | Mn2ZrAl | Mn | Zr | Al | l21 | 1.263  | -0.295 | 6.147 | 736.113 | 0.810 | 1.731  | 1.731  | -0.341 | -0.046 | 3.075 | 21 |
| 2804 | V2PtSn  | V  | Pt | Sn | xa  | -0.192 | -0.083 | 6.348 | 735.434 | 0.940 | 1.339  | -1.337 | 0.086  | -0.053 | 0.035 | 24 |
| 363  | Cr2IrSn | Cr | Ir | Sn | xa  | -1.105 | 0.065  | 6.254 | 723.251 | 0.934 | 2.936  | -2.187 | 0.193  | -0.009 | 0.933 | 25 |
| 2522 | Ti2PdBi | Ti | Pd | Bi | l21 | 0.765  | -0.170 | 6.668 | 721.771 | 0.112 | 0.452  | 0.452  | 0.022  | 0.001  | 0.927 | 23 |
| 2392 | Ti2AuGe | Ti | Au | Ge | l21 | 1.432  | -0.367 | 6.451 | 719.886 | 0.133 | 0.327  | 0.327  | 0.010  | -0.002 | 0.662 | 13 |
| 2071 | Ru2WBi  | Ru | W  | Bi | l21 | 0.290  | 0.714  | 6.496 | 718.664 | 0.146 | 0.689  | 0.689  | 0.066  | 0.023  | 1.467 | 27 |
| 8    | Co2AgPb | Co | Ag | Pb | l21 | 0.735  | 0.496  | 6.256 | 717.485 | 0.756 | 0.883  | 0.883  | 0.002  | -0.084 | 1.684 | 23 |
| 632  | Fe2MnGa | Fe | Mn | Ga | l21 | -0.314 | -0.024 | 5.750 | 716.718 | 0.662 | 2.357  | -0.211 | -0.019 | 0.009  | 2.136 | 26 |
| 1919 | Ru2FeGe | Ru | Fe | Ge | l21 | 1.214  | -0.132 | 5.994 | 716.060 | 0.737 | 0.446  | 0.446  | 3.013  | 0.016  | 3.921 | 28 |
| 2109 | Ru2ZrSb | Ru | Zr | Sb | l21 | 1.945  | -0.392 | 6.487 | 714.345 | 1.000 | 0.507  | 0.507  | -0.033 | 0.020  | 1.001 | 25 |
| 1625 | Rh2CoSb | Rh | Co | Sb | l21 | 0.378  | -0.056 | 6.197 | 707.152 | 0.888 | -0.014 | -0.014 | 1.657  | -0.016 | 1.613 | 32 |
| 1766 | Rh2RuIn | Rh | Ru | In | l21 | 0.103  | 0.105  | 6.337 | 706.915 | 0.677 | 0.728  | 0.728  | 1.932  | -0.026 | 3.362 | 29 |
| 1021 | Mn2WSb  | Mn | W  | Sb | l21 | 0.194  | 0.251  | 6.084 | 706.848 | 0.898 | 0.291  | 0.291  | 0.061  | -0.005 | 0.638 | 25 |
| 1926 | Ru2HfAs | Ru | Hf | As | l21 | 1.548  | -0.349 | 6.307 | 705.334 | 0.926 | 0.352  | 0.352  | -0.023 | 0.038  | 0.719 | 25 |
| 70   | Co2FeBi | Co | Fe | Bi | xa  | -0.030 | 0.484  | 6.106 | 705.147 | 0.605 | 1.615  | 1.135  | 2.160  | -0.063 | 4.847 | 31 |
| 576  | Fe2CrBi | Fe | Cr | Bi | l21 | 0.683  | 0.537  | 6.234 | 703.816 | 0.598 | 1.995  | 1.995  | -3.102 | -0.043 | 0.845 | 27 |
| 892  | Mn2MnAl | Mn | Mn | Al | xa  | 0.000  | -0.228 | 5.776 | 703.050 | 1.000 | 2.747  | -1.378 | -1.378 | 0.021  | 0.012 | 24 |
| 856  | Mn2CuSb | Mn | Cu | Sb | xa  | -0.058 | 0.132  | 6.191 | 696.280 | 0.514 | 3.398  | -2.398 | 0.022  | 0.062  | 1.084 | 20 |
| 2054 | Ru2TiSb | Ru | Ti | Sb | l21 | 1.734  | -0.370 | 6.304 | 695.271 | 0.917 | 0.398  | 0.398  | 0.096  | 0.010  | 0.902 | 25 |
| 823  | Mn2CdSb | Mn | Cd | Sb | l21 | 0.531  | 0.252  | 6.567 | 694.751 | 0.763 | 3.256  | 3.256  | -0.056 | -0.076 | 6.380 | 21 |
| 2644 | V2AgGa  | V  | Ag | Ga | l21 | 0.003  | 0.266  | 6.209 | 688.158 | 0.138 | 0.379  | 0.379  | -0.012 | -0.015 | 0.731 | 14 |
| 548  | Fe2AuSb | Fe | Au | Sb | l21 | 0.908  | 0.251  | 6.288 | 682.404 | 0.727 | 2.323  | 2.323  | 0.049  | -0.064 | 4.631 | 22 |
| 1734 | Rh2PdPb | Rh | Pd | Pb | l21 | 0.276  | 0.016  | 6.411 | 676.656 | 0.613 | 0.260  | 0.260  | 0.143  | -0.018 | 0.645 | 32 |

|      |         |    |    |    |     |        |        |       |         |       |        |        |        |        |       |    |
|------|---------|----|----|----|-----|--------|--------|-------|---------|-------|--------|--------|--------|--------|-------|----|
| 547  | Fe2AuPb | Fe | Au | Pb | 121 | 0.775  | 0.431  | 6.434 | 675.007 | 0.806 | 2.656  | 2.656  | 0.040  | -0.127 | 5.225 | 21 |
| 2653 | V2AuB   | V  | Au | B  | 121 | 0.538  | 0.465  | 5.940 | 674.381 | 0.321 | 0.390  | 0.390  | 0.018  | -0.024 | 0.774 | 14 |
| 2214 | Sc2MnBi | Sc | Mn | Bi | 121 | 0.691  | -0.139 | 6.985 | 670.840 | 0.726 | -0.415 | -0.415 | 3.155  | 0.026  | 2.351 | 18 |
| 2625 | Ti2ZnPb | Ti | Zn | Pb | 121 | 0.991  | 0.103  | 6.650 | 668.988 | 0.097 | 0.369  | 0.369  | 0.007  | 0.007  | 0.752 | 14 |
| 2005 | Ru2PtBi | Ru | Pt | Bi | 121 | 0.716  | 0.410  | 6.450 | 666.883 | 0.211 | 0.501  | 0.501  | 0.181  | -0.026 | 1.157 | 31 |
| 1636 | Rh2CrSb | Rh | Cr | Sb | 121 | 0.967  | -0.166 | 6.299 | 665.972 | 0.011 | 0.459  | 0.459  | 3.261  | 0.021  | 4.200 | 29 |
| 541  | Fe2AuAs | Fe | Au | As | 121 | 0.934  | 0.225  | 6.129 | 663.830 | 0.543 | 2.475  | 2.475  | 0.068  | -0.057 | 4.961 | 22 |
| 2512 | Ti2NiGa | Ti | Ni | Ga | 121 | 0.351  | -0.349 | 6.185 | 663.750 | 0.405 | 0.319  | 0.319  | 0.440  | 0.041  | 1.119 | 21 |
| 1037 | Mn2ZnB  | Mn | Zn | B  | 121 | 0.357  | 0.224  | 5.535 | 660.362 | 0.585 | 2.168  | 2.168  | 0.025  | -0.129 | 4.232 | 19 |
| 722  | Fe2ScIn | Fe | Sc | In | 121 | 0.800  | 0.041  | 6.362 | 660.360 | 0.544 | 2.264  | 2.264  | -0.463 | -0.147 | 3.918 | 22 |
| 510  | Cr2ZnBi | Cr | Zn | Bi | xa  | -0.160 | 0.519  | 6.682 | 658.934 | 0.245 | 3.484  | -3.431 | 0.002  | -0.023 | 0.032 | 19 |
| 2102 | Ru2ZrAs | Ru | Zr | As | 121 | 1.297  | -0.319 | 6.328 | 653.739 | 0.905 | 0.383  | 0.383  | -0.018 | 0.041  | 0.789 | 25 |
| 1872 | Ru2CdB  | Ru | Cd | B  | 121 | 0.497  | 0.855  | 5.994 | 645.837 | 0.141 | 0.453  | 0.453  | 0.020  | -0.030 | 0.896 | 21 |
| 26   | Co2CdBi | Co | Cd | Bi | 121 | 1.352  | 0.433  | 6.418 | 645.567 | 0.034 | 0.938  | 0.938  | -0.032 | -0.037 | 1.807 | 25 |
| 13   | Co2AuAs | Co | Au | As | 121 | 0.929  | 0.226  | 6.043 | 639.854 | 0.666 | 1.193  | 1.193  | 0.009  | -0.015 | 2.380 | 24 |
| 2390 | Ti2AuBi | Ti | Au | Bi | 121 | 1.502  | -0.094 | 6.757 | 637.856 | 0.275 | 0.318  | 0.318  | 0.010  | 0.014  | 0.660 | 14 |
| 131  | Co2NbSi | Co | Nb | Si | 121 | 0.720  | -0.327 | 5.876 | 635.776 | 0.619 | 0.847  | 0.847  | 0.035  | 0.025  | 1.754 | 27 |
| 1360 | Pd2CoPb | Pd | Co | Pb | xa  | -0.039 | 0.087  | 6.378 | 635.751 | 0.704 | 0.049  | 0.028  | 1.404  | -0.061 | 1.420 | 33 |
| 350  | Cr2HfSb | Cr | Hf | Sb | 121 | 1.224  | 0.056  | 6.351 | 632.873 | 0.936 | 1.591  | 1.591  | -0.219 | -0.047 | 2.916 | 21 |
| 2679 | V2CoIn  | V  | Co | In | xa  | -0.708 | 0.164  | 6.149 | 631.819 | 0.795 | -0.391 | 1.567  | 0.668  | 0.029  | 1.873 | 22 |
| 372  | Cr2MnSb | Cr | Mn | Sb | 121 | 0.207  | 0.148  | 6.116 | 629.071 | 0.937 | -1.557 | -1.557 | 3.122  | 0.069  | 0.077 | 24 |
| 1891 | Ru2CoSn | Ru | Co | Sn | 121 | 0.405  | 0.158  | 6.187 | 627.824 | 0.513 | 0.583  | 0.583  | 1.995  | -0.003 | 3.158 | 29 |
| 168  | Co2RhB  | Co | Rh | B  | xa  | -0.978 | 0.200  | 5.499 | 626.897 | 0.722 | 1.622  | 1.297  | 0.388  | 0.003  | 3.310 | 30 |
| 1652 | Rh2FeB  | Rh | Fe | B  | 121 | 1.526  | 0.092  | 5.719 | 625.039 | 0.721 | 0.596  | 0.596  | 3.049  | 0.015  | 4.256 | 29 |
| 2511 | Ti2NiBi | Ti | Ni | Bi | 121 | 0.664  | 0.036  | 6.530 | 619.667 | 0.317 | 0.470  | 0.470  | 0.051  | 0.010  | 1.001 | 23 |
| 1795 | Rh2VB   | Rh | V  | B  | 121 | 1.043  | 0.028  | 5.770 | 617.769 | 0.581 | 0.192  | 0.192  | 1.029  | 0.011  | 1.424 | 26 |
| 2558 | Ti2RuIn | Ti | Ru | In | xa  | -0.067 | -0.216 | 6.440 | 617.264 | 1.000 | 0.309  | 0.714  | -0.176 | -0.021 | 0.826 | 19 |
| 712  | Fe2RuPb | Fe | Ru | Pb | 121 | 0.076  | 0.542  | 6.230 | 616.039 | 0.580 | 2.404  | 2.404  | 1.357  | -0.115 | 6.050 | 28 |
| 183  | Co2RuIn | Co | Ru | In | 121 | 0.584  | 0.212  | 6.078 | 613.930 | 0.016 | 1.566  | 1.566  | 1.514  | -0.108 | 4.538 | 29 |

|      |         |    |    |    |     |        |        |       |         |       |        |        |        |        |       |    |
|------|---------|----|----|----|-----|--------|--------|-------|---------|-------|--------|--------|--------|--------|-------|----|
| 554  | Fe2CdBi | Fe | Cd | Bi | l21 | 0.981  | 0.577  | 6.539 | 613.738 | 0.676 | 2.345  | 2.345  | -0.075 | -0.117 | 4.498 | 23 |
| 688  | Fe2PtGe | Fe | Pt | Ge | l21 | 0.153  | 0.000  | 5.975 | 613.415 | 0.749 | 2.215  | 2.215  | 0.265  | -0.115 | 4.580 | 30 |
| 987  | Mn2ScPb | Mn | Sc | Pb | l21 | 0.300  | 0.139  | 6.604 | 613.400 | 0.562 | 3.180  | 3.180  | -0.395 | -0.120 | 5.845 | 21 |
| 1922 | Ru2FeSb | Ru | Fe | Sb | l21 | 1.096  | 0.033  | 6.207 | 612.193 | 0.686 | 0.586  | 0.586  | 3.105  | 0.008  | 4.285 | 29 |
| 464  | Cr2TiAs | Cr | Ti | As | l21 | 0.500  | -0.109 | 5.958 | 611.064 | 0.508 | 1.629  | 1.629  | -0.426 | -0.039 | 2.793 | 21 |
| 1656 | Rh2FeIn | Rh | Fe | In | l21 | 1.108  | -0.231 | 6.242 | 611.000 | 0.873 | 0.494  | 0.494  | 3.262  | -0.029 | 4.221 | 29 |
| 622  | Fe2IrGe | Fe | Ir | Ge | xa  | -0.233 | 0.037  | 5.946 | 608.598 | 0.245 | 2.483  | -2.166 | 0.210  | 0.063  | 0.590 | 29 |
| 794  | Mn2AgAs | Mn | Ag | As | l21 | 0.217  | 0.160  | 6.294 | 607.501 | 0.670 | 3.453  | 3.453  | 0.053  | -0.061 | 6.898 | 20 |
| 2029 | Ru2RuGe | Ru | Ru | Ge | l21 | 0.000  | 0.195  | 6.099 | 607.458 | 0.103 | 0.329  | 0.329  | 1.039  | 0.016  | 1.713 | 28 |
| 1688 | Rh2MnGe | Rh | Mn | Ge | l21 | 1.439  | -0.464 | 6.069 | 607.069 | 0.380 | 0.456  | 0.456  | 3.696  | -0.001 | 4.607 | 29 |
| 602  | Fe2FePb | Fe | Fe | Pb | xa  | 0.000  | 0.655  | 6.115 | 606.998 | 0.376 | -2.570 | 1.831  | 1.833  | -0.099 | 0.995 | 28 |
| 2466 | Ti2IrB  | Ti | Ir | B  | xa  | -0.063 | -0.174 | 5.936 | 606.740 | 0.472 | 0.554  | 1.199  | -0.018 | -0.026 | 1.709 | 20 |
| 599  | Fe2FeGa | Fe | Fe | Ga | l21 | 0.176  | 0.078  | 5.702 | 604.292 | 0.424 | -0.560 | -0.560 | 2.334  | 0.072  | 1.286 | 27 |
| 812  | Mn2AuSb | Mn | Au | Sb | l21 | 0.282  | 0.091  | 6.505 | 603.619 | 0.776 | 3.411  | 3.411  | 0.031  | -0.087 | 6.766 | 20 |
| 1965 | Ru2MoPb | Ru | Mo | Pb | l21 | 0.583  | 0.506  | 6.426 | 603.129 | 0.917 | 0.329  | 0.329  | 1.214  | -0.015 | 1.857 | 26 |
| 1043 | Mn2ZnSb | Mn | Zn | Sb | l21 | 0.337  | 0.157  | 6.319 | 603.016 | 0.451 | 3.033  | 3.033  | -0.053 | -0.079 | 5.934 | 21 |
| 852  | Mn2CuGa | Mn | Cu | Ga | xa  | -0.256 | -0.115 | 5.904 | 602.785 | 0.516 | 3.045  | -2.743 | 0.024  | -0.020 | 0.306 | 18 |
| 1365 | Pd2CrAs | Pd | Cr | As | l21 | 0.073  | -0.088 | 6.272 | 602.780 | 0.388 | 0.012  | 0.012  | 3.393  | -0.048 | 3.369 | 31 |
| 2809 | V2RhGa  | V  | Rh | Ga | xa  | -0.865 | -0.318 | 6.053 | 593.403 | 0.869 | -0.253 | 1.666  | 0.207  | 0.021  | 1.641 | 22 |
| 690  | Fe2PtPb | Fe | Pt | Pb | l21 | 0.386  | 0.318  | 6.305 | 588.674 | 0.643 | 2.551  | 2.551  | 0.241  | -0.149 | 5.194 | 30 |
| 514  | Cr2ZnPb | Cr | Zn | Pb | xa  | -0.098 | 0.535  | 6.595 | 586.568 | 0.087 | 3.476  | -3.392 | 0.025  | -0.039 | 0.070 | 18 |
| 1882 | Ru2CoAs | Ru | Co | As | l21 | 0.967  | 0.075  | 5.964 | 586.247 | 0.092 | 0.439  | 0.439  | 1.672  | -0.009 | 2.541 | 30 |
| 2470 | Ti2IrIn | Ti | Ir | In | xa  | -0.366 | -0.397 | 6.457 | 585.134 | 1.000 | 0.539  | 1.217  | -0.091 | -0.002 | 1.663 | 20 |
| 97   | Co2IrSb | Co | Ir | Sb | xa  | -0.129 | 0.230  | 6.109 | 584.979 | 0.433 | 1.658  | -0.815 | 0.143  | 0.006  | 0.992 | 32 |
| 555  | Fe2CdGa | Fe | Cd | Ga | l21 | 0.556  | 0.265  | 6.136 | 584.382 | 0.779 | 2.389  | 2.389  | -0.040 | -0.131 | 4.607 | 21 |
| 2823 | V2RuPb  | V  | Ru | Pb | xa  | -0.673 | 0.273  | 6.351 | 583.766 | 0.744 | -0.544 | 1.766  | 0.295  | 0.037  | 1.554 | 22 |
| 495  | Cr2WSn  | Cr | W  | Sn | l21 | 0.847  | 0.273  | 6.195 | 582.899 | 0.822 | 1.242  | 1.242  | -0.551 | -0.020 | 1.913 | 22 |
| 2444 | Ti2FeB  | Ti | Fe | B  | l21 | 0.711  | -0.143 | 5.795 | 576.826 | 0.531 | -0.230 | -0.230 | 1.350  | 0.089  | 0.979 | 19 |
| 1770 | Rh2RuSn | Rh | Ru | Sn | xa  | -0.203 | 0.021  | 6.298 | 574.319 | 0.528 | 0.444  | 0.330  | 0.803  | -0.023 | 1.554 | 30 |

|      |         |    |    |    |     |        |        |       |         |       |        |        |        |        |       |    |
|------|---------|----|----|----|-----|--------|--------|-------|---------|-------|--------|--------|--------|--------|-------|----|
| 294  | Cr2CdPb | Cr | Cd | Pb | l21 | 0.034  | 0.572  | 6.866 | 572.914 | 0.597 | 3.719  | 3.719  | -0.007 | -0.145 | 7.286 | 18 |
| 31   | Co2CdSb | Co | Cd | Sb | l21 | 1.603  | 0.224  | 6.249 | 572.513 | 0.353 | 0.827  | 0.827  | -0.025 | 0.000  | 1.629 | 25 |
| 314  | Cr2CrGe | Cr | Cr | Ge | xa  | 0.000  | 0.038  | 5.857 | 570.745 | 0.918 | -1.547 | 1.711  | 1.711  | -0.024 | 1.851 | 22 |
| 2416 | Ti2CoPb | Ti | Co | Pb | l21 | 0.020  | 0.111  | 6.484 | 570.232 | 0.051 | 0.379  | 0.379  | 1.359  | 0.066  | 2.183 | 21 |
| 1824 | Rh2YSi  | Rh | Y  | Si | l21 | 1.689  | -0.696 | 6.383 | 569.887 | 0.376 | 0.000  | 0.000  | 0.000  | 0.000  | 0.000 | 25 |
| 2235 | Sc2NbB  | Sc | Nb | B  | l21 | 0.038  | 0.510  | 6.465 | 568.194 | 0.617 | 0.082  | 0.082  | 0.718  | -0.011 | 0.871 | 14 |
| 492  | Cr2WPb  | Cr | W  | Pb | l21 | 0.699  | 0.666  | 6.280 | 565.755 | 0.843 | 1.266  | 1.266  | -0.618 | -0.018 | 1.896 | 22 |
| 870  | Mn2HfAl | Mn | Hf | Al | l21 | 1.468  | -0.316 | 6.114 | 565.319 | 0.950 | 1.688  | 1.688  | -0.268 | -0.044 | 3.064 | 21 |
| 1239 | Ni2RuIn | Ni | Ru | In | l21 | 0.015  | 0.151  | 6.048 | 562.934 | 0.568 | 0.249  | 0.249  | 0.673  | -0.039 | 1.132 | 31 |
| 425  | Cr2PtIn | Cr | Pt | In | xa  | -0.550 | 0.011  | 6.369 | 562.362 | 0.439 | 3.268  | -2.963 | 0.172  | -0.023 | 0.454 | 25 |
| 2394 | Ti2AuPb | Ti | Au | Pb | l21 | 1.104  | -0.074 | 6.727 | 562.056 | 0.653 | 0.420  | 0.420  | 0.004  | -0.001 | 0.843 | 13 |
| 276  | Cr2AuAl | Cr | Au | Al | xa  | -0.582 | 0.038  | 6.211 | 554.545 | 0.097 | 3.142  | -2.715 | 0.084  | 0.001  | 0.512 | 16 |
| 279  | Cr2AuBi | Cr | Au | Bi | l21 | 0.233  | 0.397  | 6.805 | 554.400 | 0.625 | 3.724  | 3.724  | 0.051  | -0.160 | 7.339 | 18 |
| 1620 | Rh2CoBi | Rh | Co | Bi | l21 | 0.245  | 0.231  | 6.345 | 553.833 | 0.812 | -0.004 | -0.004 | 1.760  | -0.021 | 1.731 | 32 |
| 147  | Co2PdBi | Co | Pd | Bi | l21 | 0.488  | 0.287  | 6.263 | 553.601 | 0.717 | 1.426  | 1.426  | 0.157  | -0.040 | 2.969 | 33 |
| 231  | Co2WSn  | Co | W  | Sn | l21 | 0.813  | 0.256  | 6.084 | 552.756 | 0.520 | 0.381  | 0.381  | 0.068  | 0.002  | 0.832 | 28 |
| 255  | Co2ZrAs | Co | Zr | As | l21 | 0.720  | -0.265 | 6.074 | 552.733 | 0.890 | 0.853  | 0.853  | -0.081 | 0.043  | 1.668 | 27 |
| 809  | Mn2AuGe | Mn | Au | Ge | l21 | 0.090  | 0.014  | 6.320 | 550.901 | 0.462 | 3.557  | 3.557  | 0.058  | -0.105 | 7.067 | 19 |
| 2734 | V2IrIn  | V  | Ir | In | xa  | -0.691 | -0.071 | 6.297 | 550.699 | 0.736 | -0.464 | 1.832  | 0.178  | 0.061  | 1.607 | 22 |
| 1820 | Rh2YGe  | Rh | Y  | Ge | l21 | 1.431  | -0.669 | 6.459 | 546.774 | 0.034 | 0.000  | 0.000  | 0.000  | 0.000  | 0.000 | 25 |
| 877  | Mn2HfPb | Mn | Hf | Pb | l21 | 0.680  | 0.187  | 6.365 | 546.496 | 0.976 | 1.198  | 1.198  | -0.303 | -0.075 | 2.018 | 22 |
| 715  | Fe2RuSn | Fe | Ru | Sn | l21 | 0.020  | 0.211  | 6.123 | 545.896 | 0.459 | 2.307  | 2.307  | 1.285  | -0.121 | 5.778 | 28 |
| 176  | Co2RhSn | Co | Rh | Sn | l21 | 0.001  | 0.053  | 6.066 | 540.791 | 0.471 | 1.408  | 1.408  | 0.456  | -0.083 | 3.189 | 31 |
| 545  | Fe2AuGe | Fe | Au | Ge | l21 | 0.663  | 0.175  | 6.107 | 538.621 | 0.724 | 2.498  | 2.498  | 0.070  | -0.080 | 4.986 | 21 |
| 49   | Co2CrGa | Co | Cr | Ga | l21 | 0.337  | -0.026 | 5.708 | 538.504 | 0.590 | -0.537 | -0.537 | 1.992  | -0.028 | 0.890 | 27 |
| 1986 | Ru2NiIn | Ru | Ni | In | xa  | -0.105 | 0.274  | 6.179 | 538.466 | 0.080 | 0.220  | 0.316  | 0.208  | -0.008 | 0.736 | 29 |
| 163  | Co2PtSb | Co | Pt | Sb | l21 | 0.466  | 0.071  | 6.107 | 538.245 | 0.813 | 1.055  | 1.055  | 0.081  | -0.029 | 2.162 | 33 |
| 2269 | Sc2PtBi | Sc | Pt | Bi | l21 | 1.605  | -0.691 | 6.975 | 537.128 | 0.264 | 0.158  | 0.158  | 0.008  | -0.010 | 0.314 | 21 |
| 2698 | V2CuBi  | V  | Cu | Bi | l21 | 0.201  | 0.523  | 6.375 | 535.725 | 0.173 | 0.867  | 0.867  | -0.003 | -0.005 | 1.726 | 16 |



|      |         |    |    |    |     |        |        |       |         |       |        |        |        |        |       |    |
|------|---------|----|----|----|-----|--------|--------|-------|---------|-------|--------|--------|--------|--------|-------|----|
| 2826 | V2RuSn  | V  | Ru | Sn | xa  | -0.875 | -0.077 | 6.264 | 534.255 | 0.806 | -0.480 | 1.752  | 0.310  | 0.037  | 1.619 | 22 |
| 2076 | Ru2WSb  | Ru | W  | Sb | l21 | 0.141  | 0.417  | 6.368 | 533.807 | 0.302 | 0.757  | 0.757  | 0.205  | 0.038  | 1.757 | 27 |
| 2732 | V2IrGa  | V  | Ir | Ga | xa  | -0.835 | -0.360 | 6.070 | 533.351 | 0.808 | -0.303 | 1.684  | 0.187  | 0.025  | 1.593 | 22 |
| 882  | Mn2IrAs | Mn | Ir | As | xa  | -0.907 | -0.067 | 6.117 | 532.669 | 0.406 | 3.368  | -3.320 | -0.044 | 0.014  | 0.018 | 28 |
| 2478 | Ti2MnBi | Ti | Mn | Bi | l21 | 0.275  | 0.083  | 6.600 | 530.690 | 0.609 | -1.074 | -1.074 | 2.618  | 0.029  | 0.499 | 20 |
| 582  | Fe2CrSi | Fe | Cr | Si | xa  | -0.072 | -0.233 | 5.637 | 528.654 | 0.376 | 2.334  | 0.880  | -1.194 | 0.025  | 2.045 | 26 |
| 1660 | Rh2FeSn | Rh | Fe | Sn | l21 | 0.864  | -0.246 | 6.242 | 528.398 | 0.845 | 0.209  | 0.209  | 3.109  | -0.016 | 3.511 | 30 |
| 483  | Cr2VSi  | Cr | V  | Si | l21 | 0.387  | -0.285 | 5.807 | 527.583 | 0.291 | 1.697  | 1.697  | -0.692 | -0.038 | 2.664 | 21 |
| 1987 | Ru2NiPb | Ru | Ni | Pb | l21 | 0.272  | 0.480  | 6.269 | 527.456 | 0.064 | 0.630  | 0.630  | 0.803  | -0.015 | 2.048 | 30 |
| 2762 | V2NbAs  | V  | Nb | As | l21 | 0.186  | -0.087 | 6.162 | 526.121 | 0.344 | 0.728  | 0.728  | -0.115 | -0.011 | 1.330 | 20 |
| 177  | Co2RuAl | Co | Ru | Al | l21 | 0.152  | -0.139 | 5.838 | 524.307 | 0.409 | 1.525  | 1.525  | 1.323  | -0.025 | 4.348 | 29 |
| 1650 | Rh2FeAl | Rh | Fe | Al | l21 | 1.476  | -0.587 | 5.997 | 523.181 | 0.812 | 0.554  | 0.554  | 3.194  | -0.003 | 4.299 | 29 |
| 618  | Fe2IrAs | Fe | Ir | As | xa  | 0.000  | 0.197  | 5.988 | 522.854 | 0.175 | 2.568  | -2.211 | 0.219  | 0.041  | 0.617 | 30 |
| 2713 | V2FePb  | V  | Fe | Pb | xa  | -0.102 | 0.401  | 6.235 | 522.015 | 0.905 | -0.749 | 1.456  | 1.199  | 0.005  | 1.911 | 22 |
| 805  | Mn2AuAs | Mn | Au | As | l21 | 0.300  | 0.054  | 6.326 | 520.987 | 0.756 | 3.463  | 3.463  | 0.047  | -0.100 | 6.873 | 20 |
| 836  | Mn2CoSn | Mn | Co | Sn | xa  | -1.373 | -0.009 | 6.066 | 518.604 | 0.419 | 3.220  | -2.518 | 0.823  | 0.014  | 1.539 | 27 |
| 581  | Fe2CrSb | Fe | Cr | Sb | l21 | 0.101  | 0.201  | 5.999 | 517.972 | 0.259 | -1.284 | -1.284 | 2.608  | 0.035  | 0.075 | 27 |
| 537  | Fe2AgSb | Fe | Ag | Sb | l21 | 0.770  | 0.348  | 6.275 | 516.485 | 0.752 | 2.364  | 2.364  | 0.059  | -0.047 | 4.740 | 22 |
| 2742 | V2MnBi  | V  | Mn | Bi | l21 | 0.177  | 0.314  | 6.468 | 515.887 | 0.053 | 2.081  | 2.081  | -3.115 | -0.049 | 0.998 | 22 |
| 1888 | Ru2CoPb | Ru | Co | Pb | l21 | 0.402  | 0.530  | 6.281 | 515.024 | 0.532 | 0.632  | 0.632  | 1.999  | -0.009 | 3.254 | 29 |
| 1222 | Ni2RhAl | Ni | Rh | Al | xa  | -0.377 | -0.408 | 5.815 | 513.797 | 0.753 | 0.485  | 0.150  | 0.205  | -0.005 | 0.835 | 32 |
| 822  | Mn2CdPb | Mn | Cd | Pb | l21 | 0.271  | 0.365  | 6.740 | 513.710 | 0.564 | 3.579  | 3.579  | -0.052 | -0.114 | 6.992 | 20 |
| 1692 | Rh2MnSi | Rh | Mn | Si | l21 | 1.930  | -0.605 | 5.973 | 511.133 | 0.459 | 0.458  | 0.458  | 3.656  | 0.003  | 4.575 | 29 |
| 1001 | Mn2TiSn | Mn | Ti | Sn | l21 | 0.955  | -0.200 | 6.127 | 508.974 | 0.975 | 1.323  | 1.323  | -0.574 | -0.061 | 2.011 | 22 |
| 1654 | Rh2FeGa | Rh | Fe | Ga | l21 | 1.327  | -0.438 | 6.017 | 507.997 | 0.904 | 0.533  | 0.533  | 3.189  | -0.014 | 4.241 | 29 |
| 360  | Cr2IrPb | Cr | Ir | Pb | xa  | -0.525 | 0.411  | 6.382 | 507.680 | 0.668 | 3.164  | -2.528 | 0.222  | 0.008  | 0.866 | 25 |
| 734  | Fe2TiPb | Fe | Ti | Pb | l21 | 0.941  | 0.154  | 6.212 | 506.708 | 0.410 | 1.689  | 1.689  | -0.719 | -0.070 | 2.589 | 24 |
| 2777 | V2NiGe  | V  | Ni | Ge | l21 | 0.152  | -0.098 | 5.934 | 504.500 | 0.241 | 0.346  | 0.346  | 0.021  | -0.008 | 0.705 | 24 |
| 538  | Fe2AgSi | Fe | Ag | Si | l21 | 0.236  | 0.216  | 5.917 | 503.817 | 0.677 | 2.130  | 2.130  | 0.076  | -0.089 | 4.247 | 21 |

|      |         |    |    |    |     |        |        |       |         |       |        |        |        |        |       |    |
|------|---------|----|----|----|-----|--------|--------|-------|---------|-------|--------|--------|--------|--------|-------|----|
| 774  | Fe2ZnBi | Fe | Zn | Bi | 121 | 0.831  | 0.498  | 6.315 | 503.415 | 0.717 | 2.205  | 2.205  | -0.081 | -0.105 | 4.224 | 23 |
| 2047 | Ru2TiAs | Ru | Ti | As | 121 | 1.399  | -0.370 | 6.125 | 503.114 | 0.877 | 0.298  | 0.298  | 0.091  | 0.032  | 0.719 | 25 |
| 24   | Co2CdAs | Co | Cd | As | 121 | 1.216  | 0.270  | 6.067 | 501.611 | 0.121 | 0.914  | 0.914  | -0.032 | 0.005  | 1.801 | 25 |
| 1765 | Rh2RuGe | Rh | Ru | Ge | xa  | -0.438 | -0.008 | 6.110 | 501.239 | 0.054 | 0.316  | 0.311  | 0.615  | -0.010 | 1.232 | 30 |
| 2405 | Ti2CdPb | Ti | Cd | Pb | 121 | 0.910  | 0.169  | 6.832 | 498.996 | 0.182 | 0.430  | 0.430  | 0.007  | 0.005  | 0.872 | 14 |
| 1707 | Rh2NbB  | Rh | Nb | B  | 121 | 0.330  | 0.166  | 6.011 | 498.446 | 0.330 | 0.148  | 0.148  | 0.033  | 0.033  | 0.362 | 26 |
| 127  | Co2NbGe | Co | Nb | Ge | 121 | 0.688  | -0.182 | 5.961 | 496.493 | 0.688 | 0.844  | 0.844  | 0.012  | 0.024  | 1.724 | 27 |
| 1876 | Ru2CdIn | Ru | Cd | In | 121 | 0.366  | 0.319  | 6.463 | 494.781 | 0.685 | 0.650  | 0.650  | 0.006  | -0.031 | 1.275 | 21 |
| 816  | Mn2CdAs | Mn | Cd | As | 121 | 0.335  | 0.233  | 6.370 | 493.611 | 0.717 | 3.277  | 3.277  | -0.057 | -0.097 | 6.400 | 21 |
| 2468 | Ti2IrGa | Ti | Ir | Ga | xa  | -0.281 | -0.602 | 6.245 | 493.459 | 1.000 | 0.540  | 1.226  | -0.068 | -0.007 | 1.691 | 20 |
| 2813 | V2RhSb  | V  | Rh | Sb | xa  | -0.400 | -0.091 | 6.256 | 491.152 | 0.919 | 0.873  | -0.875 | 0.054  | -0.005 | 0.047 | 24 |
| 550  | Fe2AuSn | Fe | Au | Sn | 121 | 0.595  | 0.205  | 6.276 | 490.135 | 0.762 | 2.409  | 2.409  | 0.041  | -0.163 | 4.696 | 21 |
| 2034 | Ru2RuSn | Ru | Ru | Sn | xa  | 0.000  | 0.286  | 6.292 | 488.264 | 0.070 | 1.275  | 0.449  | 0.449  | 0.001  | 2.174 | 28 |
| 693  | Fe2PtSn | Fe | Pt | Sn | 121 | 0.180  | 0.045  | 6.183 | 486.027 | 0.606 | 2.357  | 2.357  | 0.235  | -0.168 | 4.781 | 30 |
| 1755 | Rh2RhIn | Rh | Rh | In | xa  | 0.000  | -0.028 | 6.314 | 485.163 | 0.498 | 0.718  | 0.646  | 0.646  | -0.026 | 1.984 | 30 |
| 367  | Cr2MnBi | Cr | Mn | Bi | 121 | 0.025  | 0.502  | 6.272 | 483.673 | 0.940 | -1.664 | -1.664 | 3.298  | 0.061  | 0.031 | 24 |
| 901  | Mn2MnSi | Mn | Mn | Si | xa  | 0.000  | -0.429 | 5.635 | 483.002 | 0.944 | 2.541  | -0.798 | -0.798 | 0.045  | 0.990 | 25 |
| 491  | Cr2WIn  | Cr | W  | In | 121 | 0.993  | 0.328  | 6.236 | 473.492 | 0.289 | 1.798  | 1.798  | -0.749 | -0.013 | 2.834 | 21 |
| 921  | Mn2NbPb | Mn | Nb | Pb | 121 | 0.348  | 0.326  | 6.266 | 473.351 | 0.045 | 1.735  | 1.735  | -0.701 | -0.082 | 2.687 | 23 |
| 1503 | Pd2RuPb | Pd | Ru | Pb | xa  | -0.479 | 0.145  | 6.456 | 473.195 | 0.346 | 0.109  | 0.044  | 0.486  | -0.028 | 0.611 | 32 |
| 1149 | Ni2IrGa | Ni | Ir | Ga | xa  | -0.372 | -0.194 | 5.869 | 472.910 | 0.767 | 0.519  | 0.196  | 0.229  | -0.010 | 0.934 | 32 |
| 170  | Co2RhGa | Co | Rh | Ga | 121 | 0.031  | -0.072 | 5.854 | 472.715 | 0.489 | 1.451  | 1.451  | 0.681  | -0.084 | 3.499 | 30 |
| 123  | Co2NbAs | Co | Nb | As | xa  | 0.000  | 0.017  | 5.988 | 471.960 | 0.785 | 0.135  | 0.726  | -0.094 | -0.009 | 0.758 | 28 |
| 1740 | Rh2PtB  | Rh | Pt | B  | 121 | 0.255  | 0.495  | 5.938 | 471.796 | 0.078 | 0.060  | 0.060  | 0.019  | -0.002 | 0.137 | 31 |
| 694  | Fe2RhAl | Fe | Rh | Al | xa  | -0.259 | -0.204 | 5.883 | 470.815 | 0.334 | 2.469  | -1.905 | 0.273  | 0.029  | 0.866 | 28 |
| 664  | Fe2NiBi | Fe | Ni | Bi | 121 | 0.187  | 0.456  | 6.174 | 469.875 | 0.642 | 2.374  | 2.374  | 0.543  | -0.094 | 5.197 | 31 |
| 146  | Co2PdB  | Co | Pd | B  | 121 | 0.035  | 0.471  | 5.591 | 467.041 | 0.169 | 1.305  | 1.305  | 0.187  | -0.074 | 2.723 | 31 |
| 529  | Fe2AgAl | Fe | Ag | Al | 121 | 0.107  | 0.189  | 6.046 | 466.888 | 0.603 | 2.431  | 2.431  | 0.056  | -0.074 | 4.844 | 20 |
| 2891 | V2ZnSi  | V  | Zn | Si | 121 | 0.315  | -0.008 | 5.972 | 466.877 | 0.025 | 0.494  | 0.494  | 0.027  | -0.004 | 1.011 | 16 |

|      |         |    |    |    |     |        |        |       |         |       |        |        |        |        |       |    |
|------|---------|----|----|----|-----|--------|--------|-------|---------|-------|--------|--------|--------|--------|-------|----|
| 2033 | Ru2RuSi | Ru | Ru | Si | xa  | 0.000  | 0.043  | 6.020 | 466.535 | 0.252 | 1.099  | 0.334  | 0.334  | 0.022  | 1.789 | 28 |
| 285  | Cr2AuSi | Cr | Au | Si | xa  | -0.176 | 0.222  | 6.110 | 465.983 | 0.017 | 3.046  | -2.097 | 0.094  | 0.029  | 1.072 | 17 |
| 580  | Fe2CrPb | Fe | Cr | Pb | l21 | 0.088  | 0.664  | 6.095 | 465.828 | 0.001 | 1.885  | 1.885  | -0.480 | -0.074 | 3.216 | 26 |
| 1027 | Mn2YBi  | Mn | Y  | Bi | l21 | 0.963  | 0.133  | 6.860 | 465.434 | 0.566 | 0.000  | 0.000  | 0.005  | 0.000  | 0.005 | 22 |
| 865  | Mn2FeIn | Mn | Fe | In | xa  | -0.745 | 0.162  | 6.090 | 464.239 | 0.591 | 3.040  | -2.935 | 1.161  | -0.054 | 1.212 | 25 |
| 899  | Mn2MnPb | Mn | Mn | Pb | xa  | 0.000  | 0.337  | 6.401 | 462.989 | 0.040 | -3.569 | 3.258  | 3.258  | -0.074 | 2.873 | 25 |
| 515  | Cr2ZnSb | Cr | Zn | Sb | l21 | 0.072  | 0.354  | 6.258 | 462.415 | 0.734 | 2.199  | 2.199  | 0.009  | -0.071 | 4.336 | 19 |
| 345  | Cr2HfBi | Cr | Hf | Bi | l21 | 0.806  | 0.382  | 6.487 | 462.206 | 0.913 | 1.659  | 1.659  | -0.294 | -0.055 | 2.969 | 21 |
| 764  | Fe2YGa  | Fe | Y  | Ga | xa  | -0.143 | 0.047  | 6.419 | 461.867 | 0.305 | 0.000  | 0.000  | 0.001  | 0.000  | 0.001 | 22 |
| 944  | Mn2PdSb | Mn | Pd | Sb | xa  | -0.290 | -0.124 | 6.370 | 461.858 | 0.084 | 3.652  | -3.164 | 0.040  | 0.043  | 0.571 | 29 |
| 2159 | Sc2CrBi | Sc | Cr | Bi | l21 | 0.471  | -0.003 | 7.066 | 460.989 | 0.076 | -0.297 | -0.297 | 3.521  | -0.017 | 2.910 | 17 |
| 1033 | Mn2YSi  | Mn | Y  | Si | l21 | 0.499  | -0.057 | 6.153 | 460.765 | 0.577 | 0.000  | 0.000  | 0.009  | 0.000  | 0.009 | 21 |
| 38   | Co2CoGa | Co | Co | Ga | xa  | 0.000  | -0.099 | 5.680 | 460.652 | 0.714 | 1.716  | 1.260  | 1.260  | -0.080 | 4.156 | 30 |
| 178  | Co2RuAs | Co | Ru | As | xa  | -0.512 | 0.165  | 5.824 | 459.833 | 0.094 | -0.824 | 0.919  | -0.039 | -0.009 | 0.047 | 31 |
| 2476 | Ti2MnAs | Ti | Mn | As | l21 | 0.394  | -0.349 | 6.176 | 459.807 | 0.054 | -0.707 | -0.707 | 1.978  | 0.052  | 0.616 | 20 |
| 1659 | Rh2FeSi | Rh | Fe | Si | l21 | 1.078  | -0.424 | 5.931 | 459.441 | 0.865 | 0.255  | 0.255  | 2.988  | -0.001 | 3.497 | 30 |
| 489  | Cr2WGa  | Cr | W  | Ga | l21 | 0.765  | 0.034  | 6.019 | 459.277 | 0.577 | 1.687  | 1.687  | -0.560 | -0.027 | 2.787 | 21 |
| 2217 | Sc2MnIn | Sc | Mn | In | l21 | 0.226  | -0.174 | 6.912 | 459.209 | 0.623 | -0.294 | -0.294 | 3.399  | -0.086 | 2.725 | 16 |
| 17   | Co2AuGe | Co | Au | Ge | l21 | 0.733  | 0.145  | 5.988 | 458.924 | 0.696 | 1.019  | 1.019  | 0.011  | -0.047 | 2.002 | 23 |
| 2736 | V2IrSb  | V  | Ir | Sb | xa  | -0.322 | -0.015 | 6.270 | 458.379 | 0.926 | 0.844  | -0.787 | -0.031 | -0.004 | 0.022 | 24 |
| 1356 | Pd2CoBi | Pd | Co | Bi | xa  | -0.126 | 0.073  | 6.448 | 458.195 | 0.725 | 0.067  | 0.064  | 1.555  | -0.024 | 1.662 | 34 |
| 82   | Co2HfGa | Co | Hf | Ga | l21 | 1.569  | -0.483 | 6.016 | 457.290 | 0.954 | 0.584  | 0.584  | -0.105 | -0.009 | 1.054 | 25 |
| 318  | Cr2CrSi | Cr | Cr | Si | l21 | 0.000  | -0.169 | 5.713 | 456.521 | 0.071 | 1.190  | 1.190  | -0.832 | -0.020 | 1.528 | 22 |
| 1736 | Rh2PdSi | Rh | Pd | Si | l21 | 0.523  | -0.307 | 6.057 | 456.046 | 0.199 | 0.143  | 0.143  | 0.043  | -0.006 | 0.323 | 32 |
| 111  | Co2MoAl | Co | Mo | Al | l21 | 0.771  | -0.188 | 5.877 | 454.588 | 0.410 | 1.165  | 1.165  | 0.448  | -0.004 | 2.774 | 27 |
| 1753 | Rh2RhGa | Rh | Rh | Ga | l21 | 0.000  | -0.165 | 6.121 | 451.705 | 0.444 | 0.614  | 0.614  | 0.637  | -0.017 | 1.848 | 30 |
| 745  | Fe2VPb  | Fe | V  | Pb | l21 | 0.192  | 0.382  | 6.145 | 451.305 | 0.059 | 1.878  | 1.878  | -0.923 | -0.046 | 2.787 | 25 |
| 2153 | Sc2CoSb | Sc | Co | Sb | l21 | 1.031  | -0.385 | 6.719 | 449.567 | 0.242 | -0.121 | -0.121 | 0.820  | 0.030  | 0.608 | 20 |
| 858  | Mn2CuSn | Mn | Cu | Sn | xa  | -0.253 | 0.043  | 6.210 | 448.942 | 0.310 | 3.392  | -2.967 | 0.012  | 0.022  | 0.459 | 19 |

|      |         |    |    |    |     |        |        |       |         |       |        |        |        |        |       |    |
|------|---------|----|----|----|-----|--------|--------|-------|---------|-------|--------|--------|--------|--------|-------|----|
| 714  | Fe2RuSi | Fe | Ru | Si | xa  | -0.606 | -0.204 | 5.764 | 448.785 | 0.277 | 2.644  | -0.162 | 0.462  | 0.048  | 2.992 | 28 |
| 2537 | Ti2PtPb | Ti | Pt | Pb | l21 | 0.519  | -0.226 | 6.650 | 448.221 | 0.411 | 0.832  | 0.832  | 0.123  | 0.013  | 1.800 | 22 |
| 2544 | Ti2RhBi | Ti | Rh | Bi | l21 | 0.180  | -0.131 | 6.623 | 448.187 | 0.289 | 0.695  | 0.695  | 0.143  | 0.010  | 1.543 | 22 |
| 645  | Fe2MoIn | Fe | Mo | In | l21 | 0.735  | 0.273  | 6.143 | 447.596 | 0.347 | 1.848  | 1.848  | -0.515 | -0.083 | 3.098 | 25 |
| 2535 | Ti2PtGe | Ti | Pt | Ge | l21 | 0.647  | -0.563 | 6.372 | 447.408 | 0.289 | 0.693  | 0.693  | 0.111  | 0.002  | 1.499 | 22 |
| 102  | Co2MnB  | Co | Mn | B  | l21 | 0.585  | 0.017  | 5.350 | 447.187 | 0.820 | 0.781  | 0.781  | 2.505  | -0.042 | 4.025 | 28 |
| 704  | Fe2RhSn | Fe | Rh | Sn | xa  | -0.132 | 0.072  | 6.168 | 445.295 | 0.115 | 2.745  | -2.259 | 0.235  | 0.075  | 0.796 | 29 |
| 536  | Fe2AgPb | Fe | Ag | Pb | l21 | 0.564  | 0.553  | 6.422 | 443.152 | 0.729 | 2.662  | 2.662  | 0.046  | -0.117 | 5.253 | 21 |
| 2457 | Ti2HfGa | Ti | Hf | Ga | xa  | -0.091 | -0.120 | 6.587 | 441.258 | 0.112 | 1.103  | 0.236  | 0.156  | -0.041 | 1.454 | 15 |
| 1097 | Ni2CoPb | Ni | Co | Pb | xa  | -0.055 | 0.316  | 6.005 | 440.902 | 0.750 | 0.170  | 0.074  | 0.856  | -0.042 | 1.058 | 33 |
| 2811 | V2RhIn  | V  | Rh | In | xa  | -0.837 | -0.065 | 6.284 | 439.410 | 0.798 | -0.435 | 1.822  | 0.203  | 0.057  | 1.647 | 22 |
| 485  | Cr2WAl  | Cr | W  | Al | l21 | 0.791  | -0.059 | 6.020 | 439.176 | 0.338 | 1.680  | 1.680  | -0.551 | -0.022 | 2.787 | 21 |
| 181  | Co2RuGa | Co | Ru | Ga | l21 | 0.149  | 0.000  | 5.855 | 436.076 | 0.234 | 1.514  | 1.514  | 1.397  | -0.068 | 4.357 | 29 |
| 677  | Fe2PdGe | Fe | Pd | Ge | l21 | 0.127  | 0.024  | 5.960 | 435.667 | 0.642 | 2.327  | 2.327  | 0.165  | -0.126 | 4.693 | 30 |
| 997  | Mn2TiIn | Mn | Ti | In | l21 | 0.806  | -0.077 | 6.218 | 435.102 | 0.035 | 2.182  | 2.182  | -0.957 | -0.129 | 3.278 | 21 |
| 423  | Cr2PtGa | Cr | Pt | Ga | xa  | -0.742 | -0.174 | 6.079 | 430.443 | 0.687 | 2.909  | -2.210 | 0.212  | -0.003 | 0.908 | 25 |
| 750  | Fe2WAs  | Fe | W  | As | xa  | -0.156 | 0.245  | 5.979 | 429.916 | 0.153 | 2.320  | 1.889  | -0.264 | 0.062  | 4.007 | 27 |
| 851  | Mn2CuBi | Mn | Cu | Bi | xa  | -0.073 | 0.349  | 6.458 | 428.684 | 0.361 | 3.583  | -3.205 | 0.004  | 0.029  | 0.411 | 20 |
| 18   | Co2AuIn | Co | Au | In | l21 | 0.254  | 0.172  | 6.192 | 428.462 | 0.698 | 1.316  | 1.316  | 0.034  | -0.117 | 2.549 | 22 |
| 801  | Mn2AgSb | Mn | Ag | Sb | l21 | 0.226  | 0.183  | 6.484 | 427.681 | 0.764 | 3.414  | 3.414  | 0.041  | -0.066 | 6.803 | 20 |
| 819  | Mn2CdGa | Mn | Cd | Ga | l21 | 0.046  | 0.103  | 6.320 | 425.921 | 0.242 | 3.378  | 3.378  | -0.043 | -0.154 | 6.559 | 19 |
| 237  | Co2YGe  | Co | Y  | Ge | l21 | 1.066  | -0.228 | 6.193 | 425.594 | 0.905 | 0.000  | 0.000  | 0.005  | 0.000  | 0.005 | 25 |
| 594  | Fe2CuSn | Fe | Cu | Sn | xa  | -0.301 | 0.155  | 6.064 | 424.862 | 0.384 | 2.594  | 2.086  | 0.026  | -0.078 | 4.628 | 21 |
| 770  | Fe2YSn  | Fe | Y  | Sn | l21 | 1.187  | 0.017  | 6.542 | 424.320 | 0.547 | 0.000  | 0.000  | 0.000  | 0.000  | 0.000 | 23 |
| 35   | Co2CoAs | Co | Co | As | l21 | 0.000  | 0.163  | 5.724 | 424.009 | 0.068 | 0.682  | 0.682  | -1.092 | -0.009 | 0.263 | 32 |
| 1044 | Mn2ZnSi | Mn | Zn | Si | l21 | 0.421  | -0.145 | 5.759 | 423.955 | 0.766 | 1.807  | 1.807  | -0.005 | -0.086 | 3.523 | 20 |
| 353  | Cr2IrAl | Cr | Ir | Al | xa  | -1.196 | -0.285 | 5.974 | 423.821 | 0.973 | 2.087  | -2.035 | 0.002  | 0.001  | 0.055 | 24 |
| 81   | Co2HfBi | Co | Hf | Bi | l21 | 1.545  | 0.026  | 6.377 | 421.303 | 0.870 | 0.817  | 0.817  | -0.091 | 0.022  | 1.565 | 27 |
| 157  | Co2PtB  | Co | Pt | B  | xa  | -0.319 | 0.403  | 5.582 | 421.264 | 0.032 | -0.728 | 1.192  | -0.013 | -0.026 | 0.425 | 31 |

|      |         |    |    |    |     |        |        |       |         |       |        |        |        |        |       |    |
|------|---------|----|----|----|-----|--------|--------|-------|---------|-------|--------|--------|--------|--------|-------|----|
| 678  | Fe2PdIn | Fe | Pd | In | xa  | -0.047 | 0.139  | 6.233 | 421.136 | 0.424 | 2.786  | -2.461 | 0.068  | 0.046  | 0.439 | 29 |
| 889  | Mn2IrSb | Mn | Ir | Sb | xa  | -0.614 | -0.026 | 6.315 | 419.255 | 0.567 | 3.461  | -3.368 | -0.033 | 0.024  | 0.084 | 28 |
| 1042 | Mn2ZnPb | Mn | Zn | Pb | l21 | 0.134  | 0.333  | 6.497 | 419.144 | 0.622 | 3.400  | 3.400  | -0.061 | -0.113 | 6.626 | 20 |
| 2508 | Ti2NiAl | Ti | Ni | Al | l21 | 0.030  | -0.269 | 6.215 | 417.802 | 0.093 | 0.421  | 0.421  | 0.493  | 0.017  | 1.352 | 21 |
| 494  | Cr2WSi  | Cr | W  | Si | l21 | 0.527  | -0.112 | 5.886 | 416.940 | 0.103 | 0.812  | 0.812  | -0.273 | -0.022 | 1.329 | 22 |
| 657  | Fe2NbPb | Fe | Nb | Pb | l21 | 0.987  | 0.318  | 6.297 | 416.530 | 0.304 | 1.748  | 1.748  | -0.537 | -0.057 | 2.902 | 25 |
| 1369 | Pd2CrGe | Pd | Cr | Ge | l21 | 0.241  | -0.180 | 6.213 | 415.453 | 0.383 | 0.059  | 0.059  | 3.320  | -0.054 | 3.384 | 30 |
| 1852 | Ru2AgGa | Ru | Ag | Ga | xa  | -0.060 | 0.285  | 6.203 | 415.210 | 0.188 | 0.153  | 0.055  | -0.003 | 0.004  | 0.209 | 20 |
| 1547 | Pd2WPb  | Pd | W  | Pb | xa  | -0.103 | 0.458  | 6.546 | 412.203 | 0.648 | 0.081  | 0.019  | 0.439  | 0.040  | 0.579 | 30 |
| 534  | Fe2AgGe | Fe | Ag | Ge | l21 | 0.438  | 0.289  | 6.047 | 411.747 | 0.751 | 2.416  | 2.416  | 0.071  | -0.096 | 4.807 | 21 |
| 1865 | Ru2AuIn | Ru | Au | In | l21 | 0.144  | 0.336  | 6.408 | 411.664 | 0.049 | 0.301  | 0.301  | 0.052  | -0.011 | 0.643 | 20 |
| 2104 | Ru2ZrBi | Ru | Zr | Bi | l21 | 1.734  | -0.106 | 6.609 | 411.632 | 0.941 | 0.464  | 0.464  | -0.027 | 0.019  | 0.920 | 25 |
| 477  | Cr2VBi  | Cr | V  | Bi | l21 | 0.056  | 0.501  | 6.248 | 411.582 | 0.942 | 1.565  | 1.565  | -1.135 | -0.018 | 1.977 | 22 |
| 775  | Fe2ZnGa | Fe | Zn | Ga | xa  | -0.060 | 0.015  | 5.872 | 411.324 | 0.305 | 2.280  | 2.036  | -0.036 | -0.075 | 4.205 | 21 |
| 1436 | Pd2MoIn | Pd | Mo | In | l21 | 0.177  | 0.013  | 6.455 | 411.013 | 0.442 | 0.056  | 0.056  | 1.122  | -0.031 | 1.203 | 29 |
| 2219 | Sc2MnSb | Sc | Mn | Sb | l21 | 0.591  | -0.319 | 6.832 | 408.325 | 0.743 | -0.392 | -0.392 | 2.964  | 0.044  | 2.224 | 18 |
| 568  | Fe2CoIn | Fe | Co | In | l21 | 0.302  | 0.234  | 6.028 | 407.909 | 0.817 | 2.463  | 2.463  | 1.800  | -0.132 | 6.594 | 28 |
| 1372 | Pd2CrSb | Pd | Cr | Sb | l21 | 0.267  | -0.188 | 6.450 | 407.099 | 0.180 | 0.024  | 0.024  | 3.531  | -0.047 | 3.532 | 31 |
| 40   | Co2CoIn | Co | Co | In | l21 | 0.675  | 0.194  | 5.944 | 406.072 | 0.667 | 1.351  | 1.351  | 1.781  | -0.120 | 4.363 | 30 |
| 2716 | V2FeSn  | V  | Fe | Sn | xa  | -0.282 | 0.054  | 6.138 | 405.225 | 0.965 | -0.650 | 1.444  | 1.102  | 0.009  | 1.905 | 22 |
| 1353 | Pd2CoAl | Pd | Co | Al | l21 | 0.346  | -0.388 | 6.054 | 403.274 | 0.774 | 0.025  | 0.025  | 1.722  | -0.010 | 1.762 | 32 |
| 246  | Co2ZnBi | Co | Zn | Bi | l21 | 1.178  | 0.315  | 6.189 | 402.980 | 0.076 | 0.786  | 0.786  | -0.031 | -0.035 | 1.506 | 25 |
| 1358 | Pd2CoGe | Pd | Co | Ge | l21 | 0.023  | -0.105 | 6.089 | 402.469 | 0.796 | 0.034  | 0.034  | 1.652  | -0.013 | 1.707 | 33 |
| 1678 | Rh2IrIn | Rh | Ir | In | l21 | 0.061  | 0.081  | 6.326 | 401.982 | 0.539 | 0.433  | 0.433  | 0.668  | 0.001  | 1.535 | 30 |
| 2449 | Ti2FePb | Ti | Fe | Pb | l21 | 0.289  | 0.087  | 6.505 | 399.392 | 0.084 | -0.138 | -0.138 | 2.291  | 0.044  | 2.059 | 20 |
| 80   | Co2HfB  | Co | Hf | B  | l21 | 0.787  | -0.009 | 5.705 | 395.799 | 0.984 | 0.541  | 0.541  | -0.090 | 0.027  | 1.019 | 25 |
| 1025 | Mn2YAs  | Mn | Y  | As | xa  | -0.118 | 0.053  | 6.629 | 393.277 | 0.223 | 0.000  | 0.000  | 0.006  | 0.000  | 0.006 | 22 |
| 701  | Fe2RhPb | Fe | Rh | Pb | xa  | -0.010 | 0.396  | 6.280 | 391.348 | 0.301 | 2.804  | -2.401 | 0.224  | 0.064  | 0.691 | 29 |
| 848  | Mn2CuAl | Mn | Cu | Al | xa  | -0.407 | -0.179 | 5.865 | 391.156 | 0.530 | 2.760  | -2.548 | 0.005  | -0.010 | 0.207 | 18 |

|      |         |    |    |    |     |        |        |       |         |       |        |        |        |        |       |    |
|------|---------|----|----|----|-----|--------|--------|-------|---------|-------|--------|--------|--------|--------|-------|----|
| 257  | Co2ZrBi | Co | Zr | Bi | l21 | 1.422  | 0.001  | 6.410 | 390.557 | 0.877 | 0.910  | 0.910  | -0.082 | 0.022  | 1.760 | 27 |
| 2221 | Sc2MnSn | Sc | Mn | Sn | l21 | 0.342  | -0.286 | 6.890 | 389.501 | 0.732 | -0.331 | -0.331 | 3.379  | 0.030  | 2.747 | 17 |
| 760  | Fe2YAl  | Fe | Y  | Al | l21 | 0.298  | 0.037  | 6.228 | 388.446 | 0.907 | 0.000  | 0.000  | 0.001  | 0.000  | 0.001 | 22 |
| 872  | Mn2HfB  | Mn | Hf | B  | l21 | 0.395  | 0.157  | 5.766 | 388.422 | 0.800 | 1.614  | 1.614  | -0.159 | -0.077 | 2.992 | 21 |
| 106  | Co2MnIn | Co | Mn | In | l21 | 1.215  | 0.024  | 5.971 | 387.774 | 0.267 | 0.795  | 0.795  | 3.019  | -0.179 | 4.430 | 28 |
| 1723 | Rh2NiPb | Rh | Ni | Pb | l21 | 0.466  | 0.086  | 6.275 | 387.709 | 0.832 | 0.192  | 0.192  | 0.647  | -0.011 | 1.020 | 32 |
| 281  | Cr2AuGe | Cr | Au | Ge | l21 | 0.137  | 0.236  | 6.360 | 387.698 | 0.410 | 3.294  | 3.294  | 0.083  | -0.157 | 6.514 | 17 |
| 590  | Fe2CuIn | Fe | Cu | In | l21 | 0.138  | 0.292  | 6.082 | 387.318 | 0.404 | 2.487  | 2.487  | 0.087  | -0.165 | 4.896 | 20 |
| 1732 | Rh2PdGe | Rh | Pd | Ge | l21 | 0.445  | -0.213 | 6.141 | 386.875 | 0.481 | 0.160  | 0.160  | 0.059  | -0.009 | 0.370 | 32 |
| 1040 | Mn2ZnGe | Mn | Zn | Ge | l21 | 0.284  | 0.006  | 5.883 | 386.365 | 0.701 | 1.948  | 1.948  | -0.025 | -0.101 | 3.770 | 20 |
| 695  | Fe2RhAs | Fe | Rh | As | xa  | -0.002 | 0.095  | 5.954 | 385.852 | 0.117 | 2.660  | -2.105 | 0.184  | 0.040  | 0.779 | 30 |
| 2643 | V2AgBi  | V  | Ag | Bi | l21 | 0.468  | 0.517  | 6.755 | 385.335 | 0.878 | 2.556  | 2.556  | 0.052  | -0.077 | 5.087 | 16 |
| 1937 | Ru2IrAs | Ru | Ir | As | l21 | 0.423  | 0.322  | 6.165 | 385.181 | 0.087 | 0.534  | 0.534  | 0.283  | -0.007 | 1.344 | 30 |
| 171  | Co2RhGe | Co | Rh | Ge | xa  | -0.157 | -0.037 | 5.858 | 384.947 | 0.772 | 1.666  | 0.186  | 0.272  | 0.012  | 2.136 | 31 |
| 145  | Co2PdAs | Co | Pd | As | l21 | 0.489  | 0.062  | 5.933 | 384.583 | 0.667 | 1.430  | 1.430  | 0.177  | 0.005  | 3.042 | 33 |
| 2791 | V2PdSb  | V  | Pd | Sb | l21 | 0.132  | 0.007  | 6.324 | 384.550 | 0.083 | 0.234  | 0.234  | -0.035 | -0.009 | 0.424 | 25 |
| 482  | Cr2VSb  | Cr | V  | Sb | l21 | 0.380  | 0.106  | 6.106 | 384.285 | 0.920 | 1.438  | 1.438  | -0.919 | -0.025 | 1.932 | 22 |
| 605  | Fe2FeSn | Fe | Fe | Sn | xa  | 0.000  | 0.321  | 5.997 | 384.039 | 0.047 | -2.435 | 1.600  | 1.600  | -0.107 | 0.658 | 28 |
| 508  | Cr2ZnAs | Cr | Zn | As | l21 | 0.179  | 0.242  | 6.016 | 382.438 | 0.486 | 2.143  | 2.143  | 0.033  | -0.075 | 4.244 | 19 |
| 706  | Fe2RuAs | Fe | Ru | As | xa  | -0.289 | 0.163  | 5.904 | 382.301 | 0.085 | 2.299  | -2.120 | 0.200  | 0.050  | 0.429 | 29 |
| 1422 | Pd2MnBi | Pd | Mn | Bi | l21 | 0.378  | -0.201 | 6.610 | 382.188 | 0.221 | 0.083  | 0.083  | 4.042  | -0.059 | 4.149 | 32 |
| 2677 | V2CoGa  | V  | Co | Ga | xa  | -0.341 | -0.127 | 5.902 | 382.060 | 0.884 | -0.185 | 1.435  | 0.564  | 0.009  | 1.823 | 22 |
| 2866 | V2WIn   | V  | W  | In | l21 | 0.695  | 0.206  | 6.332 | 381.424 | 0.727 | 0.621  | 0.621  | -0.187 | 0.009  | 1.064 | 19 |
| 1629 | Rh2CrAs | Rh | Cr | As | l21 | 0.568  | -0.088 | 6.122 | 381.381 | 0.212 | 0.546  | 0.546  | 3.103  | 0.077  | 4.272 | 29 |
| 2428 | Ti2CrSb | Ti | Cr | Sb | l21 | 0.048  | -0.058 | 6.375 | 381.081 | 0.056 | 0.207  | 0.207  | -0.185 | 0.003  | 0.232 | 19 |
| 451  | Cr2RuSn | Cr | Ru | Sn | xa  | -1.037 | 0.130  | 6.226 | 380.993 | 0.966 | 2.636  | -2.508 | -0.088 | -0.010 | 0.030 | 24 |
| 471  | Cr2TiSb | Cr | Ti | Sb | l21 | 0.816  | -0.012 | 6.212 | 380.460 | 0.948 | 1.737  | 1.737  | -0.577 | -0.039 | 2.858 | 21 |
| 244  | Co2ZnAs | Co | Zn | As | l21 | 1.287  | -0.018 | 5.789 | 379.644 | 0.170 | 0.703  | 0.703  | -0.032 | 0.002  | 1.376 | 25 |
| 273  | Cr2AgSb | Cr | Ag | Sb | xa  | -0.071 | 0.379  | 6.570 | 376.826 | 0.223 | 3.519  | -3.292 | 0.037  | 0.016  | 0.280 | 18 |

|      |         |    |    |    |     |        |        |       |         |       |        |        |        |        |       |    |
|------|---------|----|----|----|-----|--------|--------|-------|---------|-------|--------|--------|--------|--------|-------|----|
| 1910 | Ru2CuPb | Ru | Cu | Pb | l21 | 0.296  | 0.509  | 6.305 | 376.177 | 0.568 | 0.572  | 0.572  | 0.145  | -0.021 | 1.268 | 21 |
| 2128 | Sc2AuGe | Sc | Au | Ge | l21 | 2.200  | -0.730 | 6.782 | 375.403 | 0.583 | 0.192  | 0.192  | 0.026  | -0.014 | 0.396 | 11 |
| 498  | Cr2YB   | Cr | Y  | B  | xa  | -1.647 | 0.537  | 6.197 | 375.354 | 1.000 | 0.000  | 0.000  | 0.012  | 0.000  | 0.012 | 18 |
| 752  | Fe2WBi  | Fe | W  | Bi | l21 | 0.766  | 0.711  | 6.238 | 375.132 | 0.748 | 1.407  | 1.407  | 0.036  | -0.025 | 2.825 | 27 |
| 756  | Fe2WPb  | Fe | W  | Pb | l21 | 0.981  | 0.618  | 6.187 | 374.842 | 0.161 | 1.281  | 1.281  | -0.240 | -0.056 | 2.266 | 26 |
| 2892 | V2ZnSn  | V  | Zn | Sn | l21 | 0.169  | 0.254  | 6.387 | 374.695 | 0.732 | 1.610  | 1.610  | 0.018  | 0.001  | 3.239 | 16 |
| 895  | Mn2MnBi | Mn | Mn | Bi | l21 | 0.000  | 0.362  | 6.427 | 373.236 | 0.600 | 3.071  | 3.071  | -3.579 | -0.073 | 2.490 | 26 |
| 2682 | V2CoSi  | V  | Co | Si | xa  | -0.345 | -0.286 | 5.776 | 373.054 | 0.917 | -0.186 | 0.716  | 0.386  | -0.004 | 0.912 | 23 |
| 2562 | Ti2RuSn | Ti | Ru | Sn | xa  | -0.532 | -0.354 | 6.437 | 373.015 | 1.000 | 0.535  | 1.228  | -0.113 | -0.003 | 1.647 | 20 |
| 2875 | V2YGa   | V  | Y  | Ga | xa  | -0.979 | 0.108  | 6.624 | 372.992 | 0.640 | 0.000  | 0.000  | 0.005  | 0.000  | 0.005 | 16 |
| 362  | Cr2IrSi | Cr | Ir | Si | xa  | -1.156 | -0.269 | 5.872 | 370.497 | 0.975 | 2.064  | -1.141 | 0.036  | 0.016  | 0.975 | 25 |
| 2781 | V2NiSi  | V  | Ni | Si | l21 | 0.022  | -0.212 | 5.851 | 369.794 | 0.216 | 0.151  | 0.151  | 0.090  | -0.003 | 0.389 | 24 |
| 1607 | Rh2CdAs | Rh | Cd | As | l21 | 0.919  | -0.062 | 6.329 | 369.181 | 0.100 | 0.299  | 0.299  | -0.001 | 0.035  | 0.632 | 25 |
| 1933 | Ru2HfSb | Ru | Hf | Sb | l21 | 2.202  | -0.406 | 6.461 | 368.620 | 0.976 | 0.496  | 0.496  | -0.042 | 0.022  | 0.972 | 25 |
| 2787 | V2PdGa  | V  | Pd | Ga | xa  | -0.403 | -0.130 | 6.109 | 368.507 | 0.846 | -0.551 | 1.281  | 0.049  | 0.024  | 0.803 | 23 |
| 1367 | Pd2CrBi | Pd | Cr | Bi | l21 | 0.287  | -0.034 | 6.613 | 367.980 | 0.470 | 0.041  | 0.041  | 3.652  | -0.053 | 3.681 | 31 |
| 2580 | Ti2TiIn | Ti | Ti | In | xa  | 0.000  | -0.034 | 6.650 | 367.475 | 0.317 | 1.135  | 0.262  | 0.262  | -0.054 | 1.605 | 15 |
| 419  | Cr2PtAl | Cr | Pt | Al | xa  | -1.104 | -0.297 | 6.047 | 367.082 | 0.976 | 2.758  | -2.001 | 0.218  | 0.000  | 0.975 | 25 |
| 1827 | Rh2ZnAs | Rh | Zn | As | l21 | 1.168  | -0.286 | 6.107 | 367.028 | 0.027 | 0.253  | 0.253  | 0.000  | 0.031  | 0.537 | 25 |
| 2831 | V2ScGa  | V  | Sc | Ga | xa  | -0.927 | -0.051 | 6.364 | 366.283 | 0.492 | 1.533  | -1.410 | 0.145  | -0.005 | 0.263 | 16 |
| 758  | Fe2WSi  | Fe | W  | Si | l21 | 0.406  | -0.149 | 5.793 | 366.162 | 0.889 | 1.020  | 1.020  | -0.100 | 0.000  | 1.940 | 26 |
| 354  | Cr2IrAs | Cr | Ir | As | xa  | -0.499 | 0.078  | 5.998 | 365.673 | 0.843 | 2.555  | -0.903 | 0.084  | 0.052  | 1.788 | 26 |
| 1592 | Rh2AgSb | Rh | Ag | Sb | l21 | 1.018  | -0.148 | 6.386 | 365.251 | 0.124 | 0.118  | 0.118  | -0.003 | 0.008  | 0.241 | 24 |
| 627  | Fe2IrSn | Fe | Ir | Sn | xa  | -0.021 | 0.159  | 6.191 | 364.694 | 0.570 | 2.738  | -2.279 | 0.244  | 0.079  | 0.782 | 29 |
| 2610 | Ti2YBi  | Ti | Y  | Bi | xa  | -0.204 | 0.084  | 7.113 | 364.690 | 0.109 | 0.000  | 0.000  | 0.006  | 0.000  | 0.006 | 16 |
| 559  | Fe2CdSb | Fe | Cd | Sb | l21 | 1.187  | 0.397  | 6.358 | 364.412 | 0.634 | 2.193  | 2.193  | -0.057 | -0.053 | 4.276 | 23 |
| 560  | Fe2CdSi | Fe | Cd | Si | l21 | 0.891  | 0.279  | 5.990 | 363.897 | 0.467 | 1.926  | 1.926  | -0.031 | -0.080 | 3.741 | 22 |
| 348  | Cr2HfIn | Cr | Hf | In | l21 | 0.363  | 0.240  | 6.491 | 363.723 | 0.784 | 2.376  | 2.376  | -0.085 | -0.099 | 4.568 | 19 |
| 928  | Mn2NiBi | Mn | Ni | Bi | xa  | -0.384 | 0.231  | 6.326 | 363.114 | 0.167 | 3.550  | -3.147 | 0.100  | 0.028  | 0.531 | 29 |

|      |         |    |    |    |     |        |        |       |         |       |        |        |        |        |       |    |
|------|---------|----|----|----|-----|--------|--------|-------|---------|-------|--------|--------|--------|--------|-------|----|
| 2800 | V2PtIn  | V  | Pt | In | xa  | -0.372 | -0.074 | 6.340 | 362.949 | 0.905 | -0.926 | 1.613  | 0.038  | 0.070  | 0.795 | 23 |
| 1045 | Mn2ZnSn | Mn | Zn | Sn | l21 | 0.218  | 0.101  | 6.307 | 362.480 | 0.401 | 3.142  | 3.142  | -0.046 | -0.130 | 6.108 | 20 |
| 1617 | Rh2CoAl | Rh | Co | Al | l21 | 0.916  | -0.453 | 5.958 | 362.092 | 0.854 | 0.553  | 0.553  | 1.999  | -0.006 | 3.099 | 30 |
| 910  | Mn2MoPb | Mn | Mo | Pb | xa  | -0.308 | 0.479  | 6.398 | 361.959 | 0.886 | 3.236  | -2.669 | -0.609 | 0.055  | 0.013 | 24 |
| 359  | Cr2IrIn | Cr | Ir | In | xa  | -0.700 | 0.125  | 6.290 | 361.914 | 0.846 | 2.877  | -2.847 | 0.060  | -0.038 | 0.052 | 24 |
| 619  | Fe2IrB  | Fe | Ir | B  | xa  | -0.918 | 0.278  | 5.574 | 361.668 | 0.435 | 2.058  | -1.552 | 0.131  | 0.078  | 0.715 | 28 |
| 187  | Co2RuSn | Co | Ru | Sn | l21 | 0.210  | 0.189  | 6.071 | 361.340 | 0.589 | 1.486  | 1.486  | 1.278  | -0.062 | 4.188 | 30 |
| 2256 | Sc2PdAs | Sc | Pd | As | l21 | 2.118  | -0.872 | 6.662 | 360.944 | 0.474 | 0.255  | 0.255  | 0.029  | -0.018 | 0.521 | 21 |
| 2387 | Ti2AuAl | Ti | Au | Al | l21 | 0.154  | -0.271 | 6.496 | 360.304 | 0.077 | 0.749  | 0.749  | 0.055  | -0.010 | 1.543 | 12 |
| 833  | Mn2CoPb | Mn | Co | Pb | xa  | -0.217 | 0.301  | 6.212 | 357.625 | 0.278 | 3.444  | -3.126 | 0.197  | 0.011  | 0.526 | 27 |
| 2854 | V2VGe   | V  | V  | Ge | l21 | 0.000  | -0.166 | 6.007 | 357.616 | 0.797 | 0.554  | 0.554  | -0.190 | -0.002 | 0.916 | 19 |
| 993  | Mn2TiB  | Mn | Ti | B  | l21 | 0.437  | -0.100 | 5.556 | 357.613 | 0.726 | 1.663  | 1.663  | -0.405 | -0.073 | 2.848 | 21 |
| 716  | Fe2ScAl | Fe | Sc | Al | l21 | 0.289  | -0.189 | 6.010 | 356.763 | 0.886 | 1.126  | 1.126  | -0.206 | -0.034 | 2.012 | 22 |
| 2599 | Ti2WBi  | Ti | W  | Bi | l21 | 0.547  | 0.227  | 6.616 | 355.320 | 0.153 | 0.166  | 0.166  | -0.044 | 0.011  | 0.299 | 19 |
| 268  | Cr2AgBi | Cr | Ag | Bi | xa  | -0.054 | 0.512  | 6.770 | 354.067 | 0.207 | 3.679  | -3.528 | 0.037  | -0.007 | 0.181 | 18 |
| 1145 | Ni2IrAl | Ni | Ir | Al | xa  | -0.383 | -0.362 | 5.845 | 353.899 | 0.754 | 0.533  | 0.205  | 0.251  | -0.004 | 0.985 | 32 |
| 93   | Co2IrGa | Co | Ir | Ga | l21 | 0.043  | -0.027 | 5.885 | 350.961 | 0.531 | 1.508  | 1.508  | 0.697  | -0.060 | 3.653 | 30 |
| 186  | Co2RuSi | Co | Ru | Si | xa  | -0.481 | -0.150 | 5.708 | 349.409 | 0.018 | 0.653  | -0.724 | 0.098  | 0.021  | 0.048 | 30 |
| 2805 | V2RhAl  | V  | Rh | Al | xa  | -1.137 | -0.388 | 6.053 | 349.000 | 0.834 | -0.282 | 1.718  | 0.210  | 0.000  | 1.646 | 22 |
| 2665 | V2CdBi  | V  | Cd | Bi | l21 | 0.646  | 0.531  | 6.874 | 348.208 | 0.233 | 2.609  | 2.609  | 0.039  | -0.062 | 5.195 | 17 |
| 2547 | Ti2RhIn | Ti | Rh | In | xa  | -0.443 | -0.372 | 6.457 | 348.059 | 1.000 | 0.618  | 1.159  | -0.087 | -0.021 | 1.669 | 20 |
| 174  | Co2RhSb | Co | Rh | Sb | l21 | 0.007  | 0.102  | 6.059 | 347.740 | 0.681 | 1.274  | 1.274  | 0.288  | -0.026 | 2.810 | 32 |
| 2267 | Sc2PtAs | Sc | Pt | As | l21 | 2.133  | -0.979 | 6.677 | 346.999 | 0.327 | 0.137  | 0.137  | 0.003  | -0.008 | 0.269 | 21 |
| 411  | Cr2PdBi | Cr | Pd | Bi | xa  | -0.287 | 0.289  | 6.590 | 346.289 | 0.092 | 3.545  | -3.368 | 0.020  | -0.014 | 0.183 | 27 |
| 135  | Co2NiB  | Co | Ni | B  | l21 | 0.241  | 0.174  | 5.310 | 345.758 | 0.038 | 1.044  | 1.044  | 0.533  | -0.057 | 2.564 | 31 |
| 2448 | Ti2FeIn | Ti | Fe | In | l21 | 0.322  | -0.053 | 6.425 | 345.328 | 0.785 | -0.405 | -0.405 | 1.993  | 0.027  | 1.210 | 19 |
| 2676 | V2CoBi  | V  | Co | Bi | xa  | -0.281 | 0.427  | 6.256 | 344.801 | 0.830 | 0.784  | -0.973 | 0.339  | -0.034 | 0.116 | 24 |
| 2654 | V2AuBi  | V  | Au | Bi | l21 | 0.696  | 0.379  | 6.566 | 343.564 | 0.204 | 1.058  | 1.058  | 0.004  | -0.018 | 2.102 | 16 |
| 337  | Cr2FeIn | Cr | Fe | In | xa  | -0.480 | 0.377  | 6.096 | 341.761 | 0.951 | -2.331 | 2.454  | 0.834  | 0.043  | 1.000 | 23 |



|      |         |    |    |    |     |        |        |       |         |       |        |        |        |        |       |    |
|------|---------|----|----|----|-----|--------|--------|-------|---------|-------|--------|--------|--------|--------|-------|----|
| 52   | Co2CrPb | Co | Cr | Pb | l21 | 0.468  | 0.491  | 6.080 | 341.482 | 0.785 | -0.824 | -0.824 | 2.821  | -0.034 | 1.139 | 28 |
| 890  | Mn2IrSi | Mn | Ir | Si | xa  | -1.364 | -0.448 | 5.823 | 341.269 | 1.000 | 2.959  | -0.234 | 0.160  | 0.024  | 2.909 | 27 |
| 763  | Fe2YBi  | Fe | Y  | Bi | l21 | 1.012  | 0.209  | 6.681 | 341.247 | 0.829 | 0.000  | 0.000  | 0.002  | 0.000  | 0.002 | 24 |
| 674  | Fe2PdBi | Fe | Pd | Bi | xa  | -0.227 | 0.438  | 5.612 | 340.821 | 0.003 | 2.568  | -1.335 | 0.066  | 0.056  | 1.355 | 29 |
| 322  | Cr2CuB  | Cr | Cu | B  | l21 | 0.219  | 0.434  | 5.465 | 339.670 | 0.404 | 0.539  | 0.539  | -0.004 | -0.026 | 1.048 | 16 |
| 519  | Cr2ZrAs | Cr | Zr | As | l21 | 0.656  | 0.005  | 6.147 | 339.000 | 0.886 | 1.591  | 1.591  | -0.258 | -0.050 | 2.874 | 21 |
| 530  | Fe2AgAs | Fe | Ag | As | l21 | 0.815  | 0.331  | 6.093 | 338.018 | 0.769 | 2.482  | 2.482  | 0.074  | -0.036 | 5.002 | 22 |
| 950  | Mn2PtBi | Mn | Pt | Bi | l21 | 0.013  | 0.093  | 6.581 | 337.603 | 0.754 | 3.697  | 3.697  | 0.217  | -0.123 | 7.488 | 29 |
| 682  | Fe2PdSn | Fe | Pd | Sn | l21 | 0.084  | 0.080  | 6.193 | 337.566 | 0.501 | 2.458  | 2.458  | 0.134  | -0.177 | 4.873 | 30 |
| 939  | Mn2PdBi | Mn | Pd | Bi | xa  | -0.140 | 0.074  | 6.562 | 337.332 | 0.045 | 3.805  | -3.422 | 0.054  | 0.042  | 0.479 | 29 |
| 2874 | V2YBi   | V  | Y  | Bi | xa  | -0.435 | 0.276  | 6.972 | 335.812 | 0.604 | 0.000  | 0.000  | 0.005  | 0.000  | 0.005 | 18 |
| 937  | Mn2PdAs | Mn | Pd | As | xa  | -0.163 | -0.134 | 6.164 | 335.606 | 0.072 | 3.611  | -3.134 | 0.066  | 0.042  | 0.585 | 29 |
| 863  | Mn2FeGa | Mn | Fe | Ga | xa  | -0.385 | -0.148 | 5.758 | 335.274 | 0.943 | 2.776  | -1.934 | 0.169  | 0.001  | 1.012 | 25 |
| 1550 | Pd2WSn  | Pd | W  | Sn | xa  | -0.174 | 0.164  | 6.456 | 335.267 | 0.387 | 0.084  | 0.027  | 0.374  | 0.045  | 0.530 | 30 |
| 1761 | Rh2RuAs | Rh | Ru | As | xa  | -0.600 | 0.116  | 6.129 | 333.553 | 0.307 | 0.176  | 0.300  | 0.442  | -0.003 | 0.915 | 31 |
| 2545 | Ti2RhGa | Ti | Rh | Ga | xa  | -0.234 | -0.547 | 6.242 | 333.364 | 1.000 | 0.617  | 1.173  | -0.064 | -0.022 | 1.704 | 20 |
| 256  | Co2ZrB  | Co | Zr | B  | l21 | 0.484  | 0.040  | 5.737 | 332.229 | 0.933 | 0.544  | 0.544  | -0.082 | 0.024  | 1.030 | 25 |
| 1776 | Rh2ScGe | Rh | Sc | Ge | l21 | 1.583  | -0.823 | 6.246 | 332.179 | 0.352 | 0.216  | 0.216  | -0.001 | 0.025  | 0.456 | 25 |
| 1887 | Ru2CoIn | Ru | Co | In | xa  | -0.048 | 0.326  | 6.210 | 331.618 | 0.283 | 1.439  | 0.611  | 1.540  | -0.057 | 3.533 | 28 |
| 2030 | Ru2RuIn | Ru | Ru | In | l21 | 0.000  | 0.368  | 6.286 | 331.617 | 0.098 | 0.188  | 0.188  | 1.049  | 0.002  | 1.427 | 27 |
| 2841 | V2TiBi  | V  | Ti | Bi | xa  | -0.125 | 0.253  | 6.468 | 331.338 | 0.833 | -0.468 | 1.226  | 0.047  | 0.007  | 0.812 | 19 |
| 705  | Fe2RuAl | Fe | Ru | Al | xa  | -0.565 | -0.208 | 5.873 | 330.931 | 0.179 | 2.599  | 2.124  | 0.430  | -0.027 | 5.126 | 27 |
| 641  | Fe2MoB  | Fe | Mo | B  | xa  | -0.296 | 0.195  | 5.600 | 329.517 | 0.045 | 1.885  | 1.806  | -0.243 | 0.007  | 3.455 | 25 |
| 579  | Fe2CrIn | Fe | Cr | In | l21 | 0.451  | 0.345  | 6.077 | 328.920 | 0.556 | 2.075  | 2.075  | -2.640 | -0.035 | 1.475 | 25 |
| 759  | Fe2WSn  | Fe | W  | Sn | l21 | 0.967  | 0.215  | 6.093 | 328.557 | 0.642 | 1.141  | 1.141  | -0.169 | -0.056 | 2.057 | 26 |
| 814  | Mn2AuSn | Mn | Au | Sn | l21 | 0.029  | 0.036  | 6.513 | 328.139 | 0.643 | 3.578  | 3.578  | 0.043  | -0.152 | 7.047 | 19 |
| 2058 | Ru2VAs  | Ru | V  | As | l21 | 0.652  | -0.042 | 6.057 | 327.680 | 0.439 | 0.230  | 0.230  | 0.030  | 0.014  | 0.504 | 26 |
| 966  | Mn2RhSb | Mn | Rh | Sb | xa  | -0.611 | -0.144 | 6.272 | 327.304 | 0.327 | 3.526  | -3.084 | 0.093  | 0.042  | 0.577 | 28 |
| 59   | Co2CuBi | Co | Cu | Bi | l21 | 0.703  | 0.398  | 6.084 | 326.829 | 0.111 | 0.595  | 0.595  | -0.023 | -0.037 | 1.130 | 24 |

|      |         |    |    |    |     |        |        |       |         |       |        |        |        |        |       |    |
|------|---------|----|----|----|-----|--------|--------|-------|---------|-------|--------|--------|--------|--------|-------|----|
| 585  | Fe2CuAs | Fe | Cu | As | l21 | 0.665  | 0.143  | 5.793 | 326.186 | 0.629 | 2.017  | 2.017  | 0.129  | -0.050 | 4.113 | 22 |
| 1363 | Pd2CoSn | Pd | Co | Sn | l21 | 0.025  | -0.172 | 6.292 | 326.104 | 0.788 | 0.024  | 0.024  | 1.703  | -0.024 | 1.727 | 33 |
| 86   | Co2HfSb | Co | Hf | Sb | l21 | 1.708  | -0.278 | 6.223 | 325.889 | 0.861 | 0.676  | 0.676  | -0.058 | 0.027  | 1.321 | 27 |
| 141  | Co2NiSb | Co | Ni | Sb | l21 | 0.281  | 0.066  | 5.899 | 325.456 | 0.681 | 0.907  | 0.907  | 0.230  | -0.026 | 2.018 | 33 |
| 1880 | Ru2CdSn | Ru | Cd | Sn | l21 | 1.201  | 0.168  | 6.434 | 324.843 | 0.454 | 0.161  | 0.161  | 0.000  | -0.010 | 0.312 | 22 |
| 898  | Mn2MnIn | Mn | Mn | In | xa  | 0.000  | 0.133  | 6.265 | 324.567 | 0.659 | -3.557 | 3.052  | 3.052  | -0.105 | 2.442 | 24 |
| 703  | Fe2RhSi | Fe | Rh | Si | xa  | -0.361 | -0.197 | 5.801 | 324.397 | 0.010 | 2.480  | -1.691 | 0.213  | 0.047  | 1.049 | 29 |
| 180  | Co2RuBi | Co | Ru | Bi | xa  | -0.032 | 0.568  | 6.214 | 322.573 | 0.607 | 1.629  | -0.237 | 0.512  | 0.023  | 1.927 | 31 |
| 335  | Cr2FeGa | Cr | Fe | Ga | xa  | -0.788 | 0.025  | 5.770 | 322.300 | 0.949 | -1.280 | 1.567  | 0.675  | 0.012  | 0.974 | 23 |
| 1658 | Rh2FeSb | Rh | Fe | Sb | l21 | 0.442  | -0.116 | 6.251 | 322.160 | 0.457 | 0.112  | 0.112  | 3.030  | -0.006 | 3.248 | 31 |
| 211  | Co2VAs  | Co | V  | As | xa  | -0.126 | -0.042 | 5.771 | 321.756 | 0.464 | 0.091  | 0.596  | -0.124 | -0.008 | 0.555 | 28 |
| 2258 | Sc2PdBi | Sc | Pd | Bi | l21 | 1.506  | -0.597 | 6.995 | 321.036 | 0.510 | 0.287  | 0.287  | 0.028  | -0.022 | 0.580 | 21 |
| 2483 | Ti2MnSb | Ti | Mn | Sb | l21 | 0.093  | -0.185 | 6.446 | 320.881 | 0.431 | -0.919 | -0.919 | 2.363  | 0.047  | 0.572 | 20 |
| 636  | Fe2MnSb | Fe | Mn | Sb | xa  | -0.164 | 0.101  | 6.047 | 320.685 | 0.285 | 2.580  | 1.946  | 2.323  | -0.053 | 6.796 | 28 |
| 357  | Cr2IrGa | Cr | Ir | Ga | xa  | -0.990 | -0.148 | 6.009 | 320.216 | 0.958 | 2.316  | -2.259 | -0.002 | -0.012 | 0.043 | 24 |
| 19   | Co2AuPb | Co | Au | Pb | l21 | 0.875  | 0.404  | 6.292 | 320.075 | 0.788 | 1.149  | 1.149  | 0.011  | -0.081 | 2.228 | 23 |
| 1030 | Mn2YIn  | Mn | Y  | In | l21 | 0.292  | 0.057  | 6.761 | 319.796 | 0.528 | 0.000  | 0.000  | 0.007  | 0.000  | 0.007 | 20 |
| 1424 | Pd2MnGe | Pd | Mn | Ge | l21 | 0.444  | -0.356 | 6.211 | 318.248 | 0.126 | 0.099  | 0.099  | 3.858  | -0.040 | 4.016 | 31 |
| 772  | Fe2ZnAs | Fe | Zn | As | l21 | 1.074  | 0.115  | 5.745 | 318.097 | 0.377 | 0.070  | 0.070  | -0.002 | -0.005 | 0.133 | 23 |
| 266  | Cr2AgAs | Cr | Ag | As | xa  | -0.174 | 0.383  | 6.354 | 317.908 | 0.087 | 3.402  | -3.238 | 0.038  | 0.013  | 0.215 | 18 |
| 1928 | Ru2HfBi | Ru | Hf | Bi | l21 | 1.982  | -0.115 | 6.583 | 317.534 | 0.964 | 0.434  | 0.434  | -0.034 | 0.017  | 0.851 | 25 |
| 2702 | V2CuPb  | V  | Cu | Pb | l21 | 0.012  | 0.535  | 6.357 | 317.226 | 0.434 | 1.263  | 1.263  | -0.004 | -0.016 | 2.506 | 15 |
| 1039 | Mn2ZnGa | Mn | Zn | Ga | l21 | 0.059  | -0.082 | 5.932 | 316.848 | 0.628 | 2.444  | 2.444  | -0.039 | -0.133 | 4.716 | 19 |
| 361  | Cr2IrSb | Cr | Ir | Sb | xa  | -0.841 | 0.141  | 6.218 | 316.775 | 0.999 | 2.880  | -1.224 | 0.174  | 0.030  | 1.860 | 26 |
| 286  | Cr2AuSn | Cr | Au | Sn | xa  | -0.019 | 0.253  | 6.537 | 316.563 | 0.201 | 3.482  | -3.289 | 0.033  | -0.019 | 0.207 | 17 |
| 596  | Fe2FeAs | Fe | Fe | As | xa  | 0.000  | 0.188  | 5.693 | 316.016 | 0.340 | 2.073  | -1.067 | -1.062 | 0.060  | 0.004 | 29 |
| 956  | Mn2PtSi | Mn | Pt | Si | xa  | -0.992 | -0.342 | 5.982 | 315.249 | 0.177 | 3.312  | -2.649 | 0.106  | 0.045  | 0.814 | 28 |
| 2870 | V2WSn   | V  | W  | Sn | l21 | 0.482  | 0.115  | 6.332 | 314.797 | 0.675 | 1.024  | 1.024  | -0.303 | 0.016  | 1.761 | 20 |
| 430  | Cr2RhAl | Cr | Rh | Al | xa  | -1.197 | -0.239 | 5.982 | 314.671 | 0.972 | 2.318  | -2.318 | 0.107  | -0.007 | 0.100 | 24 |

|      |         |    |    |    |     |        |        |       |         |       |        |        |        |        |       |    |
|------|---------|----|----|----|-----|--------|--------|-------|---------|-------|--------|--------|--------|--------|-------|----|
| 1361 | Pd2CoSb | Pd | Co | Sb | xa  | -0.171 | -0.111 | 6.277 | 314.240 | 0.551 | 0.011  | 0.011  | 1.125  | -0.020 | 1.127 | 34 |
| 1366 | Pd2CrB  | Pd | Cr | B  | l21 | 0.446  | 0.401  | 5.886 | 314.099 | 0.149 | 0.122  | 0.122  | 2.973  | -0.044 | 3.173 | 29 |
| 164  | Co2PtSi | Co | Pt | Si | xa  | -0.012 | -0.130 | 5.814 | 313.421 | 0.593 | 1.586  | -0.530 | 0.028  | 0.009  | 1.093 | 32 |
| 421  | Cr2PtB  | Cr | Pt | B  | xa  | -0.852 | 0.278  | 5.716 | 313.377 | 0.896 | 2.222  | -1.396 | 0.146  | 0.023  | 0.995 | 25 |
| 336  | Cr2FeGe | Cr | Fe | Ge | xa  | -0.155 | 0.019  | 5.755 | 313.346 | 0.904 | 1.535  | -1.243 | -0.284 | 0.001  | 0.009 | 24 |
| 751  | Fe2WB   | Fe | W  | B  | xa  | -0.076 | 0.274  | 5.622 | 312.490 | 0.162 | 1.851  | 1.752  | -0.231 | 0.021  | 3.393 | 25 |
| 1163 | Ni2MnPb | Ni | Mn | Pb | l21 | 0.534  | 0.103  | 6.152 | 312.031 | 0.214 | 0.243  | 0.243  | 3.658  | -0.071 | 4.073 | 31 |
| 708  | Fe2RuBi | Fe | Ru | Bi | l21 | 0.025  | 0.576  | 6.272 | 311.806 | 0.475 | 2.337  | 2.337  | 1.295  | -0.061 | 5.908 | 29 |
| 544  | Fe2AuGa | Fe | Au | Ga | l21 | 0.332  | 0.097  | 6.074 | 311.584 | 0.374 | 2.471  | 2.471  | 0.030  | -0.162 | 4.810 | 20 |
| 2190 | Sc2HfAs | Sc | Hf | As | l21 | 0.128  | -0.118 | 6.852 | 309.696 | 0.024 | 0.025  | 0.025  | 0.119  | -0.005 | 0.164 | 15 |
| 1373 | Pd2CrSi | Pd | Cr | Si | l21 | 0.424  | -0.236 | 6.113 | 309.308 | 0.229 | 0.078  | 0.078  | 3.228  | -0.045 | 3.339 | 30 |
| 1428 | Pd2MnSi | Pd | Mn | Si | l21 | 0.562  | -0.413 | 6.107 | 308.416 | 0.049 | 0.098  | 0.098  | 3.782  | -0.036 | 3.942 | 31 |
| 413  | Cr2PdGe | Cr | Pd | Ge | xa  | -0.381 | 0.023  | 6.085 | 308.305 | 0.214 | 2.999  | -1.575 | 0.293  | 0.034  | 1.751 | 26 |
| 815  | Mn2CdAl | Mn | Cd | Al | l21 | 0.025  | 0.077  | 6.301 | 307.858 | 0.131 | 3.260  | 3.260  | -0.040 | -0.082 | 6.398 | 19 |
| 718  | Fe2ScB  | Fe | Sc | B  | xa  | -0.308 | 0.158  | 5.755 | 307.620 | 0.942 | 2.179  | 1.977  | -0.094 | -0.029 | 4.033 | 22 |
| 1889 | Ru2CoSb | Ru | Co | Sb | l21 | 0.797  | 0.126  | 6.170 | 307.196 | 0.654 | 0.500  | 0.500  | 1.857  | -0.010 | 2.847 | 30 |
| 2237 | Sc2NbGa | Sc | Nb | Ga | l21 | 0.183  | -0.085 | 6.810 | 307.059 | 0.612 | 0.102  | 0.102  | 0.878  | -0.017 | 1.065 | 14 |
| 857  | Mn2CuSi | Mn | Cu | Si | xa  | -0.009 | -0.164 | 5.741 | 306.973 | 1.000 | 2.715  | -1.741 | -0.018 | 0.020  | 0.976 | 19 |
| 1242 | Ni2RuSi | Ni | Ru | Si | xa  | -0.944 | -0.282 | 5.731 | 306.600 | 0.205 | 0.417  | 0.174  | 0.338  | -0.006 | 0.923 | 32 |
| 1389 | Pd2FeBi | Pd | Fe | Bi | l21 | 0.005  | 0.041  | 6.553 | 304.042 | 0.442 | 0.099  | 0.099  | 3.154  | -0.012 | 3.340 | 33 |
| 9    | Co2AgSb | Co | Ag | Sb | l21 | 1.062  | 0.230  | 6.142 | 303.855 | 0.126 | 0.659  | 0.659  | -0.019 | -0.020 | 1.279 | 24 |
| 2393 | Ti2AuIn | Ti | Au | In | l21 | 0.299  | -0.188 | 6.671 | 303.121 | 0.223 | 0.786  | 0.786  | 0.042  | -0.010 | 1.604 | 12 |
| 1991 | Ru2PdAl | Ru | Pd | Al | xa  | -0.033 | -0.072 | 6.123 | 302.859 | 0.092 | 0.158  | 0.176  | 0.038  | 0.001  | 0.373 | 29 |
| 1420 | Pd2MnAs | Pd | Mn | As | l21 | 0.259  | -0.268 | 6.274 | 301.588 | 0.072 | 0.088  | 0.088  | 3.934  | -0.039 | 4.071 | 32 |
| 1174 | Ni2MoPb | Ni | Mo | Pb | l21 | 0.383  | 0.433  | 6.218 | 300.542 | 0.537 | 0.134  | 0.134  | 1.149  | -0.025 | 1.392 | 30 |
| 2415 | Ti2CoIn | Ti | Co | In | l21 | 0.023  | -0.073 | 6.385 | 299.955 | 0.635 | 0.204  | 0.204  | 1.497  | 0.080  | 1.985 | 20 |
| 713  | Fe2RuSb | Fe | Ru | Sb | xa  | -0.114 | 0.235  | 6.132 | 299.487 | 0.636 | 2.544  | -2.120 | 0.268  | 0.051  | 0.743 | 29 |
| 1737 | Rh2PdSn | Rh | Pd | Sn | l21 | 0.324  | -0.265 | 6.323 | 299.255 | 0.483 | 0.220  | 0.220  | 0.102  | -0.017 | 0.525 | 32 |
| 2740 | V2MnAs  | V  | Mn | As | xa  | -0.042 | -0.170 | 5.878 | 298.764 | 0.689 | -0.558 | 1.145  | 1.245  | -0.016 | 1.816 | 22 |

|      |         |    |    |    |     |        |        |       |         |       |        |        |        |        |       |    |
|------|---------|----|----|----|-----|--------|--------|-------|---------|-------|--------|--------|--------|--------|-------|----|
| 777  | Fe2ZnIn | Fe | Zn | In | l21 | 0.545  | 0.245  | 6.148 | 298.489 | 0.762 | 2.351  | 2.351  | -0.060 | -0.147 | 4.495 | 21 |
| 1855 | Ru2AgPb | Ru | Ag | Pb | l21 | 0.309  | 0.600  | 6.467 | 298.432 | 0.481 | 0.628  | 0.628  | 0.087  | -0.034 | 1.309 | 21 |
| 639  | Fe2MoAl | Fe | Mo | Al | l21 | 0.885  | -0.183 | 5.834 | 298.359 | 0.875 | 0.476  | 0.476  | -0.085 | -0.011 | 0.856 | 25 |
| 2460 | Ti2HfPb | Ti | Hf | Pb | l21 | 0.204  | 0.102  | 6.794 | 297.933 | 0.004 | 0.054  | 0.054  | 0.062  | -0.005 | 0.165 | 16 |
| 754  | Fe2WGe  | Fe | W  | Ge | l21 | 0.401  | 0.066  | 5.882 | 297.574 | 0.851 | 1.050  | 1.050  | -0.142 | -0.015 | 1.943 | 26 |
| 1621 | Rh2CoGa | Rh | Co | Ga | l21 | 0.837  | -0.306 | 5.977 | 297.316 | 0.864 | 0.550  | 0.550  | 1.979  | -0.021 | 3.058 | 30 |
| 609  | Fe2HfBi | Fe | Hf | Bi | l21 | 1.003  | 0.153  | 6.328 | 296.406 | 0.674 | 0.720  | 0.720  | -0.202 | -0.041 | 1.197 | 25 |
| 433  | Cr2RhBi | Cr | Rh | Bi | xa  | -0.554 | 0.329  | 6.437 | 295.854 | 0.589 | 3.387  | -2.742 | 0.192  | 0.033  | 0.870 | 26 |
| 226  | Co2WGe  | Co | W  | Ge | l21 | 0.073  | 0.156  | 5.881 | 295.312 | 0.508 | 0.359  | 0.359  | 0.050  | 0.007  | 0.775 | 28 |
| 2629 | Ti2ZrAl | Ti | Zr | Al | xa  | -0.071 | -0.133 | 6.653 | 294.948 | 0.181 | 1.165  | 0.338  | 0.122  | -0.018 | 1.607 | 15 |
| 1769 | Rh2RuSi | Rh | Ru | Si | xa  | -0.482 | -0.127 | 6.028 | 294.614 | 0.036 | 0.288  | 0.283  | 0.528  | -0.006 | 1.093 | 30 |
| 36   | Co2CoB  | Co | Co | B  | xa  | 0.000  | 0.313  | 5.325 | 294.595 | 0.219 | 0.840  | -0.348 | -0.341 | 0.034  | 0.185 | 30 |
| 894  | Mn2MnB  | Mn | Mn | B  | l21 | 0.000  | -0.050 | 5.379 | 294.440 | 0.887 | -1.000 | -1.000 | 2.017  | 0.066  | 0.083 | 24 |
| 47   | Co2CrB  | Co | Cr | B  | l21 | 0.169  | 0.153  | 5.360 | 294.395 | 0.972 | 0.842  | 0.842  | 1.337  | -0.024 | 2.997 | 27 |
| 1940 | Ru2IrGa | Ru | Ir | Ga | l21 | 0.128  | 0.090  | 6.118 | 294.287 | 0.346 | 0.050  | 0.050  | 0.192  | 0.001  | 0.293 | 28 |
| 2774 | V2NiB   | V  | Ni | B  | l21 | 0.615  | 0.069  | 5.583 | 294.188 | 0.341 | 0.325  | 0.325  | 0.245  | 0.000  | 0.895 | 23 |
| 1720 | Rh2NiGa | Rh | Ni | Ga | l21 | 0.802  | -0.349 | 5.963 | 294.022 | 0.801 | 0.519  | 0.519  | 0.851  | -0.029 | 1.860 | 31 |
| 296  | Cr2CdSi | Cr | Cd | Si | l21 | 0.110  | 0.385  | 6.185 | 293.594 | 0.423 | 2.537  | 2.537  | 0.025  | -0.100 | 4.999 | 18 |
| 1749 | Rh2RhAl | Rh | Rh | Al | l21 | 0.000  | -0.296 | 6.109 | 293.556 | 0.717 | 0.641  | 0.641  | 0.745  | -0.005 | 2.022 | 30 |
| 2096 | Ru2ZnIn | Ru | Zn | In | l21 | 0.413  | 0.160  | 6.279 | 293.351 | 0.648 | 0.621  | 0.621  | -0.002 | -0.014 | 1.226 | 21 |
| 429  | Cr2PtSn | Cr | Pt | Sn | xa  | -0.419 | 0.014  | 6.377 | 292.898 | 0.283 | 3.309  | -2.952 | 0.090  | -0.007 | 0.440 | 26 |
| 1854 | Ru2AgIn | Ru | Ag | In | xa  | -0.236 | 0.398  | 6.392 | 292.339 | 0.379 | 0.148  | 0.061  | -0.003 | 0.000  | 0.206 | 20 |
| 943  | Mn2PdPb | Mn | Pd | Pb | xa  | -0.226 | 0.061  | 6.484 | 292.053 | 0.001 | 3.747  | -3.504 | 0.033  | 0.012  | 0.288 | 28 |
| 89   | Co2IrAl | Co | Ir | Al | xa  | -0.013 | -0.190 | 5.838 | 291.360 | 0.019 | 1.372  | -0.983 | 0.228  | 0.023  | 0.640 | 30 |
| 531  | Fe2AgB  | Fe | Ag | B  | l21 | 0.176  | 0.760  | 5.727 | 291.025 | 0.454 | 2.391  | 2.391  | 0.077  | -0.147 | 4.712 | 20 |
| 1437 | Pd2MoPb | Pd | Mo | Pb | xa  | -0.121 | 0.246  | 6.536 | 291.023 | 0.501 | 0.131  | 0.021  | 0.908  | 0.033  | 1.093 | 30 |
| 781  | Fe2ZnSn | Fe | Zn | Sn | l21 | 0.703  | 0.208  | 6.105 | 290.470 | 0.571 | 2.035  | 2.035  | -0.059 | -0.135 | 3.876 | 22 |
| 586  | Fe2CuB  | Fe | Cu | B  | l21 | 0.212  | 0.306  | 5.380 | 290.027 | 0.829 | 1.685  | 1.685  | 0.163  | -0.125 | 3.408 | 20 |
| 484  | Cr2VSn  | Cr | V  | Sn | l21 | 0.419  | 0.101  | 6.179 | 289.787 | 0.772 | 2.057  | 2.057  | -1.206 | -0.014 | 2.894 | 21 |

|      |         |    |    |    |     |        |        |       |         |       |        |        |        |        |       |    |
|------|---------|----|----|----|-----|--------|--------|-------|---------|-------|--------|--------|--------|--------|-------|----|
| 150  | Co2PdIn | Co | Pd | In | l21 | 0.639  | 0.092  | 6.110 | 289.574 | 0.415 | 1.436  | 1.436  | 0.182  | -0.133 | 2.921 | 31 |
| 1426 | Pd2MnPb | Pd | Mn | Pb | l21 | 0.445  | -0.196 | 6.527 | 289.138 | 0.016 | 0.095  | 0.095  | 4.001  | -0.058 | 4.133 | 31 |
| 767  | Fe2YPb  | Fe | Y  | Pb | l21 | 0.943  | 0.253  | 6.667 | 288.766 | 0.641 | 0.000  | 0.000  | 0.001  | 0.000  | 0.001 | 23 |
| 2274 | Sc2PtSb | Sc | Pt | Sb | l21 | 1.645  | -0.835 | 6.877 | 288.202 | 0.373 | 0.174  | 0.174  | 0.010  | -0.010 | 0.348 | 21 |
| 2065 | Ru2VSb  | Ru | V  | Sb | l21 | 0.885  | -0.001 | 6.250 | 287.721 | 0.501 | 0.386  | 0.386  | -0.012 | 0.004  | 0.764 | 26 |
| 431  | Cr2RhAs | Cr | Rh | As | xa  | -0.589 | -0.004 | 5.970 | 287.229 | 0.967 | 2.671  | -1.113 | 0.269  | 0.047  | 1.874 | 26 |
| 463  | Cr2TiAl | Cr | Ti | Al | xa  | -0.147 | -0.033 | 6.027 | 286.314 | 0.778 | -0.729 | 1.547  | 0.039  | -0.005 | 0.852 | 19 |
| 2049 | Ru2TiBi | Ru | Ti | Bi | l21 | 1.434  | -0.025 | 6.438 | 286.151 | 0.926 | 0.386  | 0.386  | 0.112  | 0.011  | 0.895 | 25 |
| 569  | Fe2CoPb | Fe | Co | Pb | l21 | 0.201  | 0.501  | 6.117 | 286.120 | 0.732 | 2.358  | 2.358  | 1.713  | -0.109 | 6.320 | 29 |
| 604  | Fe2FeSi | Fe | Fe | Si | l21 | 0.020  | -0.320 | 5.592 | 286.065 | 0.467 | 1.332  | 1.332  | 2.559  | -0.045 | 5.178 | 28 |
| 262  | Co2ZrSb | Co | Zr | Sb | l21 | 1.559  | -0.290 | 6.260 | 285.799 | 0.923 | 0.798  | 0.798  | -0.054 | 0.026  | 1.568 | 27 |
| 490  | Cr2WGe  | Cr | W  | Ge | l21 | 0.656  | 0.086  | 5.980 | 285.275 | 0.655 | 1.167  | 1.167  | -0.435 | -0.031 | 1.868 | 22 |
| 343  | Cr2HfAs | Cr | Hf | As | l21 | 0.771  | 0.040  | 6.131 | 284.805 | 0.882 | 1.565  | 1.565  | -0.146 | -0.044 | 2.940 | 21 |
| 941  | Mn2PdGe | Mn | Pd | Ge | xa  | -0.361 | -0.210 | 6.103 | 284.544 | 0.053 | 3.513  | -3.026 | 0.073  | 0.042  | 0.602 | 28 |
| 1780 | Rh2ScSi | Rh | Sc | Si | l21 | 1.930  | -0.911 | 6.157 | 284.242 | 0.217 | 0.168  | 0.168  | 0.000  | 0.017  | 0.353 | 25 |
| 1781 | Rh2ScSn | Rh | Sc | Sn | l21 | 1.837  | -0.856 | 6.445 | 284.124 | 0.021 | 0.168  | 0.168  | 0.001  | 0.020  | 0.357 | 25 |
| 2661 | V2AuSn  | V  | Au | Sn | l21 | 0.295  | 0.171  | 6.463 | 283.519 | 0.395 | 1.329  | 1.329  | -0.017 | -0.035 | 2.606 | 15 |
| 1226 | Ni2RhGa | Ni | Rh | Ga | xa  | -0.394 | -0.281 | 5.835 | 283.192 | 0.802 | 0.497  | 0.153  | 0.194  | -0.012 | 0.832 | 32 |
| 2135 | Sc2CdAs | Sc | Cd | As | l21 | 1.950  | -0.468 | 6.907 | 281.209 | 0.287 | 0.075  | 0.075  | 0.003  | 0.004  | 0.157 | 13 |
| 2873 | V2YB    | V  | Y  | B  | xa  | -1.047 | 0.560  | 6.215 | 281.094 | 0.426 | 0.000  | 0.000  | 0.007  | 0.000  | 0.007 | 16 |
| 55   | Co2CrSn | Co | Cr | Sn | l21 | 0.530  | 0.158  | 5.975 | 280.960 | 0.844 | -0.795 | -0.795 | 2.691  | -0.028 | 1.073 | 28 |
| 2521 | Ti2PdB  | Ti | Pd | B  | l21 | 0.625  | -0.073 | 6.043 | 280.664 | 0.125 | 0.437  | 0.437  | 0.114  | -0.017 | 0.971 | 21 |
| 2750 | V2MoAl  | V  | Mo | Al | l21 | 0.279  | -0.138 | 6.123 | 280.482 | 0.522 | 0.485  | 0.485  | -0.152 | -0.006 | 0.812 | 19 |
| 1371 | Pd2CrPb | Pd | Cr | Pb | l21 | 0.301  | -0.027 | 6.530 | 279.211 | 0.247 | 0.046  | 0.046  | 3.567  | -0.066 | 3.593 | 30 |
| 1895 | Ru2CrBi | Ru | Cr | Bi | l21 | 1.262  | 0.367  | 6.363 | 279.190 | 0.976 | -0.037 | -0.037 | 2.883  | 0.001  | 2.810 | 27 |
| 540  | Fe2AuAl | Fe | Au | Al | l21 | 0.124  | 0.029  | 6.056 | 278.620 | 0.639 | 2.374  | 2.374  | 0.031  | -0.076 | 4.703 | 20 |
| 2690 | V2CrIn  | V  | Cr | In | xa  | -0.072 | 0.272  | 6.248 | 278.133 | 0.563 | -0.878 | 0.475  | 2.104  | -0.013 | 1.688 | 19 |
| 920  | Mn2NbIn | Mn | Nb | In | l21 | 0.842  | 0.038  | 6.230 | 277.818 | 0.766 | 1.346  | 1.346  | -0.587 | -0.073 | 2.032 | 22 |
| 355  | Cr2IrB  | Cr | Ir | B  | xa  | -1.197 | 0.175  | 5.647 | 277.742 | 0.865 | 1.478  | -1.343 | -0.067 | 0.026  | 0.094 | 24 |

|      |         |    |    |    |     |        |        |       |         |       |        |        |        |        |       |    |
|------|---------|----|----|----|-----|--------|--------|-------|---------|-------|--------|--------|--------|--------|-------|----|
| 34   | Co2CoAl | Co | Co | Al | l21 | 0.001  | -0.056 | 5.662 | 277.610 | 0.104 | 0.453  | 0.453  | -0.855 | -0.018 | 0.033 | 30 |
| 1875 | Ru2CdGe | Ru | Cd | Ge | l21 | 1.150  | 0.201  | 6.247 | 277.345 | 0.444 | 0.198  | 0.198  | 0.003  | -0.012 | 0.387 | 22 |
| 1866 | Ru2AuPb | Ru | Au | Pb | l21 | 0.667  | 0.519  | 6.488 | 276.269 | 0.219 | 0.646  | 0.646  | 0.118  | -0.034 | 1.376 | 21 |
| 626  | Fe2IrSi | Fe | Ir | Si | xa  | -0.461 | -0.172 | 5.829 | 275.977 | 0.407 | 2.334  | -1.998 | 0.181  | 0.050  | 0.567 | 29 |
| 1053 | Mn2ZrPb | Mn | Zr | Pb | l21 | 0.944  | 0.095  | 6.578 | 275.673 | 0.071 | 3.011  | 3.011  | -0.653 | -0.094 | 5.275 | 22 |
| 1102 | Ni2CrAs | Ni | Cr | As | xa  | -0.102 | -0.003 | 5.766 | 275.663 | 0.385 | 0.239  | 0.071  | 1.663  | -0.020 | 1.953 | 31 |
| 2397 | Ti2AuSn | Ti | Au | Sn | l21 | 0.991  | -0.264 | 6.649 | 275.200 | 0.498 | 0.415  | 0.415  | 0.004  | 0.003  | 0.837 | 13 |
| 2865 | V2WGe   | V  | W  | Ge | l21 | 0.269  | -0.035 | 6.114 | 274.651 | 0.111 | 0.740  | 0.740  | -0.150 | -0.006 | 1.324 | 20 |
| 2821 | V2RuGe  | V  | Ru | Ge | xa  | -0.809 | -0.252 | 6.024 | 274.252 | 0.424 | -0.300 | 1.208  | 0.193  | 0.001  | 1.102 | 22 |
| 2703 | V2CuSb  | V  | Cu | Sb | l21 | 0.177  | 0.224  | 6.229 | 273.497 | 0.161 | 0.641  | 0.641  | 0.001  | -0.010 | 1.273 | 16 |
| 778  | Fe2ZnPb | Fe | Zn | Pb | l21 | 0.785  | 0.491  | 6.266 | 273.273 | 0.759 | 2.307  | 2.307  | -0.061 | -0.111 | 4.442 | 22 |
| 450  | Cr2RuSi | Cr | Ru | Si | xa  | -1.039 | -0.233 | 5.829 | 273.252 | 0.903 | 1.594  | -1.424 | -0.128 | 0.014  | 0.056 | 24 |
| 365  | Cr2MnAs | Cr | Mn | As | l21 | 0.178  | -0.027 | 5.842 | 273.135 | 0.767 | -1.389 | -1.389 | 2.799  | 0.081  | 0.102 | 24 |
| 2793 | V2PdSn  | V  | Pd | Sn | xa  | -0.301 | -0.012 | 6.359 | 272.546 | 0.752 | 1.422  | -1.436 | 0.108  | -0.049 | 0.045 | 24 |
| 382  | Cr2MoPb | Cr | Mo | Pb | l21 | 0.178  | 0.627  | 6.296 | 271.820 | 0.829 | 1.416  | 1.416  | -0.816 | -0.030 | 1.986 | 22 |
| 2015 | Ru2RhB  | Ru | Rh | B  | l21 | 0.453  | 0.506  | 5.829 | 271.555 | 0.410 | 0.031  | 0.031  | 0.145  | 0.001  | 0.208 | 28 |
| 239  | Co2YPb  | Co | Y  | Pb | l21 | 1.264  | 0.013  | 6.518 | 271.438 | 0.766 | 0.000  | 0.000  | 0.004  | 0.000  | 0.004 | 25 |
| 2733 | V2IrGe  | V  | Ir | Ge | xa  | -0.622 | -0.266 | 6.052 | 271.146 | 0.356 | -0.365 | 0.964  | 0.121  | 0.007  | 0.727 | 23 |
| 445  | Cr2RuGa | Cr | Ru | Ga | xa  | -0.873 | -0.049 | 5.965 | 270.928 | 0.867 | -1.754 | 2.350  | 0.227  | 0.026  | 0.849 | 23 |
| 2607 | Ti2YAl  | Ti | Y  | Al | xa  | -0.411 | -0.014 | 6.885 | 270.921 | 0.112 | 0.000  | 0.000  | 0.009  | 0.000  | 0.009 | 14 |
| 2163 | Sc2CrPb | Sc | Cr | Pb | l21 | 0.301  | 0.032  | 7.033 | 270.208 | 0.530 | -0.227 | -0.227 | 3.545  | -0.068 | 3.023 | 16 |
| 813  | Mn2AuSi | Mn | Au | Si | xa  | -0.120 | -0.007 | 6.123 | 269.837 | 0.108 | 3.386  | -2.966 | 0.012  | 0.049  | 0.481 | 19 |
| 2211 | Sc2MnAl | Sc | Mn | Al | l21 | 0.157  | -0.192 | 6.702 | 268.318 | 0.693 | -0.253 | -0.253 | 3.132  | -0.014 | 2.612 | 16 |
| 503  | Cr2YPb  | Cr | Y  | Pb | xa  | -0.691 | 0.308  | 7.023 | 268.078 | 0.343 | 0.000  | 0.000  | 0.007  | 0.000  | 0.007 | 19 |
| 825  | Mn2CdSn | Mn | Cd | Sn | l21 | 0.378  | 0.189  | 6.566 | 268.001 | 0.709 | 3.393  | 3.393  | -0.038 | -0.126 | 6.622 | 20 |
| 1035 | Mn2ZnAl | Mn | Zn | Al | l21 | 0.324  | -0.132 | 5.924 | 267.857 | 0.742 | 2.410  | 2.410  | -0.033 | -0.068 | 4.719 | 19 |
| 2808 | V2RhBi  | V  | Rh | Bi | xa  | -0.190 | 0.227  | 6.413 | 267.641 | 0.958 | 1.318  | -1.354 | 0.096  | -0.026 | 0.034 | 24 |
| 1870 | Ru2CdAl | Ru | Cd | Al | l21 | 0.515  | 0.079  | 6.247 | 267.049 | 0.102 | 0.466  | 0.466  | 0.014  | -0.013 | 0.933 | 21 |
| 720  | Fe2ScGa | Fe | Sc | Ga | l21 | 0.821  | -0.133 | 6.002 | 266.901 | 0.934 | 1.142  | 1.142  | -0.241 | -0.089 | 1.954 | 22 |

|      |         |    |    |    |     |        |        |       |         |       |        |        |        |        |       |    |
|------|---------|----|----|----|-----|--------|--------|-------|---------|-------|--------|--------|--------|--------|-------|----|
| 741  | Fe2VBi  | Fe | V  | Bi | l2l | 0.032  | 0.413  | 6.171 | 266.682 | 0.626 | 1.722  | 1.722  | -1.157 | -0.031 | 2.256 | 26 |
| 159  | Co2PtGa | Co | Pt | Ga | xa  | -0.112 | -0.156 | 5.925 | 266.429 | 0.817 | 1.620  | 1.560  | 0.201  | -0.033 | 3.348 | 31 |
| 280  | Cr2AuGa | Cr | Au | Ga | xa  | -0.239 | 0.128  | 6.249 | 266.174 | 0.170 | 3.232  | -3.002 | 0.060  | -0.013 | 0.277 | 16 |
| 395  | Cr2NbSi | Cr | Nb | Si | l2l | 0.701  | -0.185 | 6.003 | 266.039 | 0.652 | 1.626  | 1.626  | -0.389 | -0.048 | 2.815 | 21 |
| 2181 | Sc2FeBi | Sc | Fe | Bi | l2l | 1.033  | -0.164 | 6.894 | 265.598 | 0.004 | -0.385 | -0.385 | 2.214  | 0.056  | 1.500 | 19 |
| 1228 | Ni2RhIn | Ni | Rh | In | xa  | -0.054 | -0.061 | 6.075 | 265.456 | 0.830 | 0.539  | 0.146  | 0.186  | -0.016 | 0.855 | 32 |
| 1760 | Rh2RuAl | Rh | Ru | Al | xa  | -0.046 | -0.191 | 6.085 | 265.421 | 0.432 | 0.270  | 0.103  | 0.354  | 0.001  | 0.728 | 29 |
| 1763 | Rh2RuBi | Rh | Ru | Bi | xa  | -0.353 | 0.330  | 6.416 | 265.381 | 0.171 | 0.379  | 0.316  | 0.714  | -0.019 | 1.390 | 31 |
| 2779 | V2NiPb  | V  | Ni | Pb | xa  | -0.268 | 0.393  | 6.282 | 263.841 | 0.704 | 1.238  | -1.345 | 0.244  | -0.050 | 0.087 | 24 |
| 149  | Co2PdGe | Co | Pd | Ge | l2l | 0.104  | -0.020 | 5.885 | 263.826 | 0.642 | 1.263  | 1.263  | 0.156  | -0.055 | 2.627 | 32 |
| 443  | Cr2RuB  | Cr | Ru | B  | xa  | -1.049 | 0.191  | 5.587 | 263.802 | 0.512 | -0.602 | 1.232  | 0.187  | -0.020 | 0.797 | 23 |
| 378  | Cr2MoBi | Cr | Mo | Bi | xa  | -0.161 | 0.655  | 6.459 | 263.788 | 0.907 | -2.576 | 2.802  | 0.704  | -0.037 | 0.893 | 23 |
| 424  | Cr2PtGe | Cr | Pt | Ge | xa  | -0.605 | -0.036 | 6.056 | 263.629 | 0.972 | 2.865  | -1.268 | 0.248  | 0.024  | 1.869 | 26 |
| 14   | Co2AuB  | Co | Au | B  | l2l | 0.252  | 0.672  | 5.709 | 263.549 | 0.537 | 1.259  | 1.259  | 0.058  | -0.067 | 2.509 | 22 |
| 346  | Cr2HfGa | Cr | Hf | Ga | l2l | 0.103  | 0.088  | 6.268 | 263.442 | 0.655 | 2.275  | 2.275  | 0.051  | -0.090 | 4.511 | 19 |
| 78   | Co2HfAl | Co | Hf | Al | l2l | 1.993  | -0.573 | 6.022 | 262.742 | 0.870 | 0.586  | 0.586  | -0.101 | -0.001 | 1.070 | 25 |
| 151  | Co2PdPb | Co | Pd | Pb | l2l | 0.149  | 0.299  | 6.198 | 262.683 | 0.623 | 1.344  | 1.344  | 0.154  | -0.093 | 2.749 | 32 |
| 1159 | Ni2MnBi | Ni | Mn | Bi | l2l | 0.517  | 0.117  | 6.228 | 262.552 | 0.461 | 0.215  | 0.215  | 3.718  | -0.037 | 4.111 | 32 |
| 2797 | V2PtBi  | V  | Pt | Bi | l2l | 0.462  | 0.192  | 6.518 | 262.532 | 0.204 | 1.611  | 1.611  | -0.022 | -0.035 | 3.165 | 25 |
| 595  | Fe2FeAl | Fe | Fe | Al | l2l | 1.012  | -0.161 | 5.606 | 262.162 | 0.449 | 1.801  | 1.801  | 2.326  | -0.054 | 5.874 | 27 |
| 2860 | V2WAl   | V  | W  | Al | l2l | 0.452  | -0.110 | 6.135 | 262.075 | 0.699 | 0.493  | 0.493  | -0.126 | -0.005 | 0.855 | 19 |
| 384  | Cr2MoSi | Cr | Mo | Si | l2l | 0.253  | -0.128 | 5.889 | 261.815 | 0.663 | 1.196  | 1.196  | -0.445 | -0.037 | 1.910 | 22 |
| 2152 | Sc2CoPb | Sc | Co | Pb | l2l | 0.815  | -0.191 | 6.829 | 261.649 | 0.319 | -0.175 | -0.175 | 1.302  | 0.089  | 1.041 | 19 |
| 333  | Cr2FeB  | Cr | Fe | B  | xa  | -0.248 | 0.125  | 5.387 | 261.127 | 0.608 | -0.445 | 0.877  | 0.585  | -0.023 | 0.994 | 23 |
| 121  | Co2MoSn | Co | Mo | Sn | l2l | 0.585  | 0.168  | 6.077 | 260.589 | 0.155 | 1.287  | 1.287  | 1.168  | -0.022 | 3.720 | 28 |
| 562  | Fe2CoAl | Fe | Co | Al | xa  | -1.212 | -0.263 | 5.690 | 259.714 | 0.479 | 2.566  | 1.603  | 1.047  | -0.045 | 5.171 | 28 |
| 521  | Cr2ZrBi | Cr | Zr | Bi | l2l | 0.641  | 0.338  | 6.509 | 259.652 | 0.909 | 1.689  | 1.689  | -0.379 | -0.065 | 2.934 | 21 |
| 1936 | Ru2IrAl | Ru | Ir | Al | xa  | -0.007 | -0.049 | 6.115 | 258.308 | 0.275 | 1.224  | 0.525  | 0.373  | 0.007  | 2.129 | 28 |
| 2583 | Ti2TiSi | Ti | Ti | Si | xa  | 0.000  | -0.316 | 6.289 | 258.293 | 0.366 | 0.922  | 0.207  | 0.207  | -0.027 | 1.309 | 16 |

|      |         |    |    |    |     |        |        |       |         |       |        |        |        |        |       |    |
|------|---------|----|----|----|-----|--------|--------|-------|---------|-------|--------|--------|--------|--------|-------|----|
| 1125 | Ni2FeB  | Ni | Fe | B  | xa  | -0.204 | 0.146  | 5.342 | 258.213 | 0.192 | 0.480  | 0.162  | 1.965  | -0.058 | 2.549 | 31 |
| 1368 | Pd2CrGa | Pd | Cr | Ga | l21 | 0.482  | -0.311 | 6.192 | 258.016 | 0.206 | 0.119  | 0.119  | 3.299  | -0.045 | 3.492 | 29 |
| 1094 | Ni2CoGa | Ni | Co | Ga | xa  | -0.097 | -0.162 | 5.676 | 257.935 | 0.709 | 0.414  | 0.208  | 1.186  | -0.054 | 1.754 | 32 |
| 2678 | V2CoGe  | V  | Co | Ge | xa  | -0.214 | -0.120 | 5.880 | 257.876 | 0.835 | -0.263 | 0.791  | 0.376  | 0.004  | 0.908 | 23 |
| 1041 | Mn2ZnIn | Mn | Zn | In | l21 | 0.001  | 0.094  | 6.336 | 257.795 | 0.264 | 3.345  | 3.345  | -0.066 | -0.159 | 6.465 | 19 |
| 1921 | Ru2FePb | Ru | Fe | Pb | l21 | 0.896  | 0.381  | 6.312 | 257.570 | 0.623 | 0.537  | 0.537  | 3.152  | -0.010 | 4.216 | 28 |
| 817  | Mn2CdB  | Mn | Cd | B  | xa  | -0.183 | 0.661  | 5.930 | 257.109 | 0.031 | 3.205  | -2.885 | 0.018  | 0.065  | 0.403 | 19 |
| 305  | Cr2CoPb | Cr | Co | Pb | xa  | -1.126 | 0.497  | 6.218 | 257.060 | 0.753 | 2.886  | -2.610 | 0.826  | -0.066 | 1.036 | 25 |
| 2557 | Ti2RuGe | Ti | Ru | Ge | xa  | -0.224 | -0.459 | 6.216 | 256.981 | 1.000 | 0.540  | 1.229  | -0.075 | -0.015 | 1.679 | 20 |
| 449  | Cr2RuSb | Cr | Ru | Sb | xa  | -1.094 | 0.134  | 6.186 | 256.971 | 0.973 | 2.695  | -1.787 | 0.008  | 0.030  | 0.946 | 25 |
| 278  | Cr2AuB  | Cr | Au | B  | xa  | -0.216 | 0.709  | 5.817 | 256.494 | 0.529 | 2.676  | -1.105 | 0.192  | 0.037  | 1.800 | 16 |
| 583  | Fe2CrSn | Fe | Cr | Sn | l21 | 0.272  | 0.287  | 5.980 | 255.980 | 0.249 | 1.656  | 1.656  | -0.589 | -0.076 | 2.647 | 26 |
| 2725 | V2HfSb  | V  | Hf | Sb | l21 | 0.376  | 0.019  | 6.466 | 254.813 | 0.400 | 0.723  | 0.723  | 0.007  | -0.017 | 1.436 | 19 |
| 533  | Fe2AgGa | Fe | Ag | Ga | l21 | 0.270  | 0.235  | 6.059 | 254.051 | 0.553 | 2.504  | 2.504  | 0.053  | -0.161 | 4.900 | 20 |
| 2883 | V2ZnAs  | V  | Zn | As | l21 | 0.729  | 0.080  | 6.082 | 254.026 | 0.043 | 0.675  | 0.675  | 0.042  | -0.009 | 1.383 | 17 |
| 435  | Cr2RhGe | Cr | Rh | Ge | xa  | -0.974 | -0.112 | 5.984 | 253.124 | 0.916 | 2.614  | -1.857 | 0.218  | 0.009  | 0.984 | 25 |
| 1693 | Rh2MnSn | Rh | Mn | Sn | l21 | 1.429  | -0.458 | 6.281 | 252.743 | 0.457 | 0.434  | 0.434  | 3.801  | -0.030 | 4.639 | 29 |
| 301  | Cr2CoBi | Cr | Co | Bi | xa  | -1.001 | 0.506  | 6.237 | 252.102 | 0.953 | 2.960  | -2.105 | 1.088  | -0.009 | 1.934 | 26 |
| 2615 | Ti2YSb  | Ti | Y  | Sb | xa  | -0.095 | -0.100 | 6.973 | 251.041 | 0.019 | 0.000  | 0.000  | 0.006  | 0.000  | 0.006 | 16 |
| 771  | Fe2ZnAl | Fe | Zn | Al | l21 | 0.563  | -0.043 | 5.788 | 250.881 | 0.859 | 1.429  | 1.429  | -0.034 | -0.055 | 2.769 | 21 |
| 1772 | Rh2ScAs | Rh | Sc | As | l21 | 0.927  | -0.649 | 6.289 | 250.498 | 0.588 | 0.304  | 0.304  | 0.005  | 0.053  | 0.666 | 26 |
| 2785 | V2PdB   | V  | Pd | B  | xa  | -0.049 | 0.282  | 5.775 | 250.237 | 0.673 | -0.184 | 0.932  | 0.080  | -0.021 | 0.807 | 23 |
| 565  | Fe2CoBi | Fe | Co | Bi | l21 | 0.224  | 0.513  | 6.177 | 250.042 | 0.725 | 2.350  | 2.350  | 1.685  | -0.068 | 6.317 | 30 |
| 2438 | Ti2CuPb | Ti | Cu | Pb | l21 | 0.785  | 0.108  | 6.559 | 249.699 | 0.274 | 0.290  | 0.290  | 0.005  | 0.002  | 0.587 | 13 |
| 885  | Mn2IrGa | Mn | Ir | Ga | xa  | -1.436 | -0.332 | 5.949 | 249.463 | 0.694 | 3.150  | -1.513 | 0.240  | 0.032  | 1.909 | 26 |
| 2871 | V2YAl   | V  | Y  | Al | xa  | -0.775 | 0.154  | 6.655 | 249.336 | 0.530 | 0.000  | 0.000  | 0.005  | 0.000  | 0.005 | 16 |
| 768  | Fe2YSb  | Fe | Y  | Sb | l21 | 1.212  | -0.016 | 6.499 | 249.019 | 0.818 | 0.000  | 0.000  | 0.002  | 0.000  | 0.002 | 24 |
| 1130 | Ni2FePb | Ni | Fe | Pb | l21 | 0.225  | 0.261  | 6.102 | 248.800 | 0.306 | 0.228  | 0.228  | 2.932  | -0.040 | 3.348 | 32 |
| 841  | Mn2CrGa | Mn | Cr | Ga | l21 | 0.176  | -0.121 | 5.738 | 248.311 | 0.913 | 1.121  | 1.121  | -1.225 | -0.005 | 1.012 | 23 |



|      |         |    |    |    |     |        |        |       |         |       |        |        |        |        |       |    |
|------|---------|----|----|----|-----|--------|--------|-------|---------|-------|--------|--------|--------|--------|-------|----|
| 867  | Mn2FeSb | Mn | Fe | Sb | xa  | -0.643 | 0.117  | 5.970 | 248.247 | 0.286 | 3.144  | -2.128 | -0.792 | 0.065  | 0.289 | 27 |
| 459  | Cr2ScPb | Cr | Sc | Pb | xa  | -0.536 | 0.269  | 6.744 | 246.778 | 0.886 | 3.542  | -3.216 | 0.356  | 0.046  | 0.728 | 19 |
| 681  | Fe2PdSi | Fe | Pd | Si | l21 | 0.000  | -0.072 | 5.845 | 245.804 | 0.576 | 2.091  | 2.091  | 0.179  | -0.102 | 4.259 | 30 |
| 631  | Fe2MnBi | Fe | Mn | Bi | l21 | 0.557  | 0.484  | 6.206 | 245.745 | 0.485 | 1.872  | 1.872  | -3.348 | -0.052 | 0.344 | 28 |
| 2212 | Sc2MnAs | Sc | Mn | As | l21 | 0.850  | -0.406 | 6.568 | 245.231 | 0.818 | -0.352 | -0.352 | 2.580  | 0.054  | 1.930 | 18 |
| 137  | Co2NiGa | Co | Ni | Ga | l21 | 0.380  | -0.112 | 5.670 | 245.107 | 0.171 | 1.140  | 1.140  | 0.572  | -0.093 | 2.759 | 31 |
| 41   | Co2CoPb | Co | Co | Pb | xa  | 0.000  | 0.454  | 6.046 | 244.949 | 0.664 | 1.652  | 1.326  | 1.326  | -0.079 | 4.225 | 31 |
| 436  | Cr2RhIn | Cr | Rh | In | xa  | -0.891 | 0.068  | 6.288 | 244.288 | 0.737 | 2.995  | -2.994 | 0.142  | -0.062 | 0.081 | 24 |
| 1881 | Ru2CoAl | Ru | Co | Al | l21 | 0.328  | -0.136 | 5.930 | 244.263 | 0.289 | 0.257  | 0.257  | 1.589  | 0.009  | 2.112 | 28 |
| 1013 | Mn2WAl  | Mn | W  | Al | l21 | 1.321  | -0.285 | 5.889 | 244.260 | 0.882 | 0.616  | 0.616  | -0.229 | -0.011 | 0.992 | 23 |
| 479  | Cr2VGe  | Cr | V  | Ge | l21 | 0.414  | -0.111 | 5.908 | 244.099 | 0.646 | 1.845  | 1.845  | -0.856 | -0.030 | 2.804 | 21 |
| 139  | Co2NiIn | Co | Ni | In | l21 | 0.320  | 0.170  | 5.933 | 243.602 | 0.381 | 1.274  | 1.274  | 0.571  | -0.126 | 2.993 | 31 |
| 769  | Fe2YSi  | Fe | Y  | Si | l21 | 0.330  | -0.061 | 6.061 | 243.513 | 0.809 | 0.000  | 0.000  | 0.002  | 0.000  | 0.002 | 23 |
| 328  | Cr2CuSb | Cr | Cu | Sb | xa  | -0.278 | 0.295  | 6.245 | 243.462 | 0.175 | 3.044  | -2.757 | 0.019  | 0.002  | 0.308 | 18 |
| 1627 | Rh2CoSn | Rh | Co | Sn | l21 | 0.552  | -0.152 | 6.200 | 242.662 | 0.898 | 0.269  | 0.269  | 1.844  | -0.015 | 2.367 | 31 |
| 1362 | Pd2CoSi | Pd | Co | Si | l21 | 0.114  | -0.194 | 5.988 | 242.445 | 0.766 | 0.016  | 0.016  | 1.570  | -0.009 | 1.593 | 33 |
| 2683 | V2CoSn  | V  | Co | Sn | xa  | -0.580 | 0.072  | 6.129 | 242.051 | 0.715 | -0.469 | 1.001  | 0.412  | 0.029  | 0.973 | 23 |
| 1559 | Pd2YSb  | Pd | Y  | Sb | l21 | 0.799  | -0.857 | 6.810 | 242.042 | 0.000 | 0.000  | 0.000  | 0.000  | 0.000  | 0.000 | 28 |
| 1506 | Pd2RuSn | Pd | Ru | Sn | xa  | -0.542 | -0.127 | 6.365 | 242.011 | 0.265 | 0.105  | 0.048  | 0.443  | -0.025 | 0.571 | 32 |
| 152  | Co2PdSb | Co | Pd | Sb | l21 | 0.435  | 0.035  | 6.085 | 241.898 | 0.653 | 1.078  | 1.078  | 0.074  | -0.032 | 2.198 | 33 |
| 2515 | Ti2NiPb | Ti | Ni | Pb | l21 | 0.300  | 0.053  | 6.499 | 241.446 | 0.082 | 0.058  | 0.058  | 0.072  | 0.000  | 0.188 | 22 |
| 218  | Co2VSb  | Co | V  | Sb | l21 | 0.356  | 0.051  | 5.975 | 241.102 | 0.692 | 0.638  | 0.638  | -0.726 | 0.020  | 0.570 | 28 |
| 2552 | Ti2RuAl | Ti | Ru | Al | xa  | -0.086 | -0.450 | 6.235 | 240.938 | 1.000 | 0.264  | 0.725  | -0.126 | -0.010 | 0.853 | 19 |
| 600  | Fe2FeGe | Fe | Fe | Ge | l21 | 0.000  | -0.102 | 5.706 | 240.548 | 0.400 | 1.420  | 1.420  | 2.604  | -0.073 | 5.371 | 28 |
| 2778 | V2NiIn  | V  | Ni | In | xa  | -0.469 | 0.188  | 6.178 | 240.159 | 0.824 | -0.598 | 1.342  | 0.122  | 0.054  | 0.920 | 23 |
| 1924 | Ru2FeSn | Ru | Fe | Sn | l21 | 1.056  | 0.005  | 6.218 | 240.035 | 0.555 | 0.501  | 0.501  | 3.139  | -0.001 | 4.140 | 28 |
| 1717 | Rh2NiAs | Rh | Ni | As | l21 | 0.769  | -0.139 | 5.983 | 239.970 | 0.156 | 0.011  | 0.011  | 0.072  | -0.001 | 0.093 | 33 |
| 589  | Fe2CuGe | Fe | Cu | Ge | xa  | -0.073 | 0.062  | 5.799 | 239.943 | 0.512 | 2.472  | 1.833  | 0.029  | -0.035 | 4.299 | 21 |
| 2252 | Sc2NiSb | Sc | Ni | Sb | l21 | 1.511  | -0.495 | 6.756 | 239.931 | 0.492 | 0.149  | 0.149  | 0.058  | -0.009 | 0.347 | 21 |

|      |         |    |    |    |     |        |        |       |         |       |        |        |        |        |       |    |
|------|---------|----|----|----|-----|--------|--------|-------|---------|-------|--------|--------|--------|--------|-------|----|
| 2795 | V2PtAs  | V  | Pt | As | l21 | 0.833  | -0.208 | 6.142 | 238.823 | 0.030 | 0.113  | 0.113  | -0.003 | -0.003 | 0.220 | 25 |
| 2185 | Sc2FePb | Sc | Fe | Pb | l21 | 0.644  | -0.124 | 6.862 | 237.925 | 0.696 | -0.281 | -0.281 | 2.217  | 0.056  | 1.711 | 18 |
| 391  | Cr2NbGe | Cr | Nb | Ge | l21 | 0.759  | -0.049 | 6.087 | 237.909 | 0.752 | 1.674  | 1.674  | -0.465 | -0.048 | 2.835 | 21 |
| 2549 | Ti2RhSb | Ti | Rh | Sb | l21 | 0.088  | -0.365 | 6.497 | 237.621 | 0.034 | 0.526  | 0.526  | 0.143  | -0.001 | 1.194 | 22 |
| 653  | Fe2NbBi | Fe | Nb | Bi | l21 | 0.957  | 0.353  | 6.302 | 237.605 | 0.450 | 1.376  | 1.376  | -0.401 | -0.040 | 2.311 | 26 |
| 2715 | V2FeSi  | V  | Fe | Si | xa  | -0.775 | -0.337 | 5.786 | 237.078 | 0.941 | -0.332 | 1.295  | 0.893  | -0.018 | 1.838 | 22 |
| 2747 | V2MnSb  | V  | Mn | Sb | xa  | -0.112 | -0.018 | 6.135 | 237.051 | 0.922 | -0.782 | 1.277  | 1.409  | -0.016 | 1.888 | 22 |
| 12   | Co2AuAl | Co | Au | Al | l21 | 0.313  | -0.054 | 5.957 | 237.002 | 0.714 | 1.162  | 1.162  | 0.037  | -0.037 | 2.324 | 22 |
| 2133 | Sc2AuSn | Sc | Au | Sn | l21 | 1.806  | -0.667 | 6.987 | 236.738 | 0.482 | 0.227  | 0.227  | 0.026  | -0.018 | 0.462 | 11 |
| 2510 | Ti2NiB  | Ti | Ni | B  | l21 | 1.246  | -0.170 | 5.815 | 236.311 | 0.154 | 0.302  | 0.302  | 0.364  | 0.002  | 0.970 | 21 |
| 525  | Cr2ZrPb | Cr | Zr | Pb | l21 | 0.565  | 0.353  | 6.535 | 236.277 | 0.918 | 2.128  | 2.128  | -0.390 | -0.094 | 3.772 | 20 |
| 1034 | Mn2YSn  | Mn | Y  | Sn | l21 | 0.603  | -0.044 | 6.709 | 236.034 | 0.242 | 0.000  | 0.000  | 0.006  | 0.000  | 0.006 | 21 |
| 1726 | Rh2NiSn | Rh | Ni | Sn | l21 | 0.622  | -0.244 | 6.180 | 236.009 | 0.845 | 0.210  | 0.210  | 0.632  | -0.013 | 1.039 | 32 |
| 2060 | Ru2VBi  | Ru | V  | Bi | l21 | 0.661  | 0.360  | 6.374 | 235.695 | 0.351 | 0.357  | 0.357  | 0.035  | -0.002 | 0.747 | 26 |
| 284  | Cr2AuSb | Cr | Au | Sb | l21 | 0.265  | 0.274  | 6.649 | 235.155 | 0.364 | 3.624  | 3.624  | 0.072  | -0.114 | 7.206 | 18 |
| 105  | Co2MnGe | Co | Mn | Ge | l21 | 1.195  | -0.272 | 5.726 | 235.126 | 0.991 | 0.990  | 0.990  | 3.065  | -0.051 | 4.994 | 29 |
| 2158 | Sc2CrB  | Sc | Cr | B  | l21 | 0.472  | 0.351  | 6.278 | 233.856 | 0.781 | -0.070 | -0.070 | 2.641  | -0.053 | 2.448 | 15 |
| 375  | Cr2MoAl | Cr | Mo | Al | l21 | 0.462  | -0.050 | 6.023 | 233.308 | 0.159 | 1.733  | 1.733  | -0.638 | -0.025 | 2.803 | 21 |
| 136  | Co2NiBi | Co | Ni | Bi | l21 | 0.256  | 0.403  | 6.057 | 233.249 | 0.674 | 1.083  | 1.083  | 0.353  | -0.046 | 2.473 | 33 |
| 1273 | Ni2VPb  | Ni | V  | Pb | l21 | 0.360  | 0.221  | 6.140 | 233.105 | 0.538 | 0.007  | 0.007  | 1.219  | -0.047 | 1.186 | 29 |
| 753  | Fe2WGa  | Fe | W  | Ga | l21 | 0.935  | -0.056 | 5.860 | 233.086 | 0.952 | 0.555  | 0.555  | -0.105 | -0.031 | 0.974 | 25 |
| 185  | Co2RuSb | Co | Ru | Sb | xa  | -0.488 | 0.167  | 6.068 | 232.986 | 0.350 | 1.570  | 1.244  | 0.569  | -0.013 | 3.370 | 31 |
| 2743 | V2MnGa  | V  | Mn | Ga | xa  | -0.182 | -0.158 | 5.922 | 232.970 | 0.934 | -0.379 | 1.183  | 1.064  | -0.013 | 1.855 | 20 |
| 96   | Co2IrPb | Co | Ir | Pb | l21 | 0.289  | 0.482  | 6.188 | 232.581 | 0.512 | 1.462  | 1.462  | 0.478  | -0.064 | 3.338 | 31 |
| 909  | Mn2MoIn | Mn | Mo | In | l21 | 0.339  | 0.208  | 6.111 | 232.204 | 0.807 | 0.724  | 0.724  | -0.424 | -0.025 | 0.999 | 23 |
| 1900 | Ru2CrSb | Ru | Cr | Sb | l21 | 1.349  | 0.016  | 6.231 | 232.143 | 0.985 | 0.019  | 0.019  | 2.801  | 0.009  | 2.848 | 27 |
| 2459 | Ti2HfIn | Ti | Hf | In | l21 | 0.070  | -0.003 | 6.758 | 231.911 | 0.022 | 0.173  | 0.173  | 0.343  | -0.019 | 0.670 | 15 |
| 165  | Co2PtSn | Co | Pt | Sn | l21 | 0.368  | -0.006 | 6.112 | 231.792 | 0.706 | 1.287  | 1.287  | 0.152  | -0.083 | 2.643 | 32 |
| 1243 | Ni2RuSn | Ni | Ru | Sn | xa  | -0.234 | 0.038  | 6.070 | 231.696 | 0.812 | 0.494  | 0.144  | 0.395  | -0.018 | 1.015 | 32 |

|      |         |    |    |    |     |        |        |       |         |       |        |        |        |        |       |    |
|------|---------|----|----|----|-----|--------|--------|-------|---------|-------|--------|--------|--------|--------|-------|----|
| 699  | Fe2RhGe | Fe | Rh | Ge | xa  | -0.219 | -0.030 | 5.921 | 231.478 | 0.402 | 2.559  | -2.114 | 0.258  | 0.063  | 0.766 | 29 |
| 2411 | Ti2CoB  | Ti | Co | B  | l21 | 0.789  | -0.141 | 5.802 | 231.475 | 0.010 | 0.000  | 0.000  | 0.005  | 0.001  | 0.006 | 20 |
| 634  | Fe2MnIn | Fe | Mn | In | xa  | -0.235 | 0.362  | 6.128 | 231.432 | 0.335 | -2.695 | 2.075  | 3.008  | -0.122 | 2.266 | 26 |
| 2755 | V2MoGe  | V  | Mo | Ge | l21 | 0.031  | -0.103 | 6.100 | 231.252 | 0.281 | 0.612  | 0.612  | -0.159 | -0.010 | 1.055 | 20 |
| 961  | Mn2RhBi | Mn | Rh | Bi | xa  | -0.347 | 0.103  | 6.467 | 231.149 | 0.237 | 3.665  | -3.520 | -0.006 | 0.001  | 0.140 | 28 |
| 755  | Fe2WIn  | Fe | W  | In | l21 | 1.313  | 0.268  | 6.075 | 231.100 | 0.858 | 0.655  | 0.655  | -0.172 | -0.054 | 1.084 | 25 |
| 1101 | Ni2CrAl | Ni | Cr | Al | l21 | 0.602  | -0.263 | 5.773 | 231.086 | 0.305 | 0.326  | 0.326  | 2.535  | -0.029 | 3.158 | 29 |
| 2814 | V2RhSi  | V  | Rh | Si | xa  | -0.847 | -0.420 | 5.942 | 230.788 | 0.674 | -0.285 | 0.947  | 0.152  | -0.005 | 0.809 | 23 |
| 2867 | V2WPb   | V  | W  | Pb | l21 | 0.560  | 0.458  | 6.412 | 230.194 | 0.565 | 1.065  | 1.065  | -0.354 | 0.015  | 1.791 | 20 |
| 153  | Co2PdSi | Co | Pd | Si | xa  | 0.000  | -0.131 | 5.797 | 230.114 | 0.707 | 1.524  | 1.184  | 0.009  | -0.006 | 2.711 | 32 |
| 1427 | Pd2MnSb | Pd | Mn | Sb | l21 | 0.418  | -0.351 | 6.459 | 228.824 | 0.058 | 0.088  | 0.088  | 3.990  | -0.016 | 4.150 | 32 |
| 905  | Mn2MoB  | Mn | Mo | B  | l21 | 0.250  | 0.135  | 5.582 | 228.520 | 0.699 | 0.599  | 0.599  | -0.208 | -0.025 | 0.965 | 23 |
| 2372 | Sc2ZrPb | Sc | Zr | Pb | l21 | 0.104  | -0.055 | 7.203 | 228.452 | 0.505 | 0.259  | 0.259  | 0.828  | -0.044 | 1.302 | 14 |
| 169  | Co2RhBi | Co | Rh | Bi | l21 | 0.182  | 0.373  | 6.233 | 227.259 | 0.445 | 1.547  | 1.547  | 0.490  | -0.023 | 3.561 | 32 |
| 2669 | V2CdPb  | V  | Cd | Pb | l21 | 0.500  | 0.564  | 6.807 | 227.256 | 0.691 | 2.501  | 2.501  | 0.030  | -0.068 | 4.964 | 16 |
| 512  | Cr2ZnGe | Cr | Zn | Ge | l21 | 0.147  | 0.189  | 6.046 | 226.908 | 0.331 | 2.529  | 2.529  | 0.020  | -0.077 | 5.001 | 18 |
| 584  | Fe2CuAl | Fe | Cu | Al | l21 | 0.232  | -0.006 | 5.750 | 226.624 | 0.743 | 1.847  | 1.847  | 0.135  | -0.065 | 3.764 | 20 |
| 572  | Fe2CoSn | Fe | Co | Sn | l21 | 0.257  | 0.153  | 5.880 | 226.605 | 0.503 | 1.802  | 1.802  | 1.735  | -0.134 | 5.205 | 29 |
| 396  | Cr2NbSn | Cr | Nb | Sn | l21 | 0.959  | 0.082  | 6.310 | 226.171 | 0.900 | 1.761  | 1.761  | -0.606 | -0.048 | 2.868 | 21 |
| 427  | Cr2PtSb | Cr | Pt | Sb | xa  | -0.483 | 0.125  | 6.423 | 225.645 | 0.053 | 3.397  | -3.066 | 0.031  | 0.027  | 0.389 | 27 |
| 666  | Fe2NiGe | Fe | Ni | Ge | l21 | 0.119  | -0.026 | 5.714 | 225.339 | 0.489 | 1.867  | 1.867  | 0.472  | -0.112 | 4.094 | 30 |
| 1893 | Ru2CrAs | Ru | Cr | As | l21 | 1.108  | -0.012 | 6.033 | 224.956 | 0.869 | 0.014  | 0.014  | 2.679  | 0.047  | 2.754 | 27 |
| 2464 | Ti2IrAl | Ti | Ir | Al | xa  | -0.602 | -0.663 | 6.249 | 224.473 | 1.000 | 0.504  | 1.233  | -0.071 | -0.010 | 1.656 | 20 |
| 861  | Mn2FeB  | Mn | Fe | B  | xa  | -0.109 | -0.012 | 5.345 | 223.912 | 0.927 | 2.054  | -0.961 | -0.045 | 0.037  | 1.085 | 25 |
| 2720 | V2HfBi  | V  | Hf | Bi | l21 | 0.338  | 0.311  | 6.627 | 223.866 | 0.182 | 1.239  | 1.239  | 0.068  | -0.029 | 2.517 | 19 |
| 166  | Co2RhAl | Co | Rh | Al | l21 | 0.087  | -0.195 | 5.840 | 223.828 | 0.496 | 1.451  | 1.451  | 0.701  | -0.028 | 3.575 | 30 |
| 520  | Cr2ZrB  | Cr | Zr | B  | xa  | -0.610 | 0.372  | 5.870 | 223.810 | 0.105 | -0.337 | 0.450  | -0.025 | -0.006 | 0.082 | 19 |
| 1787 | Rh2TiGe | Rh | Ti | Ge | l21 | 1.119  | -0.655 | 6.149 | 223.791 | 0.125 | 0.195  | 0.195  | 0.063  | 0.026  | 0.479 | 26 |
| 129  | Co2NbPb | Co | Nb | Pb | l21 | 1.135  | 0.238  | 6.258 | 223.678 | 0.807 | 0.847  | 0.847  | 0.000  | 0.007  | 1.701 | 27 |

|      |         |    |    |    |     |        |        |       |         |       |        |        |        |        |       |    |
|------|---------|----|----|----|-----|--------|--------|-------|---------|-------|--------|--------|--------|--------|-------|----|
| 1537 | Pd2VSb  | Pd | V  | Sb | xa  | -0.006 | -0.194 | 6.415 | 223.670 | 0.583 | -0.001 | -0.025 | 1.492  | -0.030 | 1.436 | 30 |
| 802  | Mn2AgSi | Mn | Ag | Si | xa  | -0.079 | 0.093  | 6.090 | 223.319 | 0.238 | 3.355  | -2.837 | 0.007  | 0.043  | 0.568 | 19 |
| 50   | Co2CrGe | Co | Cr | Ge | l21 | 0.606  | -0.102 | 5.730 | 222.925 | 1.000 | 0.932  | 0.932  | 2.154  | -0.045 | 3.973 | 28 |
| 2729 | V2IrAs  | V  | Ir | As | l21 | 0.018  | -0.103 | 6.115 | 222.161 | 0.068 | 0.681  | 0.681  | 0.118  | 0.005  | 1.485 | 24 |
| 2195 | Sc2HfIn | Sc | Hf | In | l21 | 0.148  | -0.073 | 7.151 | 222.117 | 0.194 | 0.372  | 0.372  | 0.874  | -0.035 | 1.583 | 13 |
| 977  | Mn2RuSb | Mn | Ru | Sb | xa  | -1.314 | -0.029 | 6.114 | 222.096 | 0.978 | 3.203  | -0.511 | 0.190  | 0.029  | 2.911 | 27 |
| 2786 | V2PdBi  | V  | Pd | Bi | l21 | 0.139  | 0.273  | 6.501 | 221.112 | 0.081 | 1.470  | 1.470  | -0.037 | -0.041 | 2.862 | 25 |
| 1551 | Pd2YAl  | Pd | Y  | Al | l21 | 1.170  | -0.849 | 6.621 | 221.071 | 0.000 | 0.000  | 0.000  | 0.000  | 0.000  | 0.000 | 26 |
| 442  | Cr2RuAs | Cr | Ru | As | xa  | -0.855 | 0.036  | 5.937 | 220.993 | 0.973 | 2.247  | -1.278 | -0.075 | 0.052  | 0.946 | 25 |
| 2446 | Ti2FeGa | Ti | Fe | Ga | l21 | 0.357  | -0.321 | 6.173 | 220.801 | 0.791 | -0.264 | -0.264 | 1.617  | 0.030  | 1.119 | 19 |
| 2772 | V2NiAl  | V  | Ni | Al | xa  | -0.468 | -0.101 | 5.934 | 220.546 | 0.729 | -0.131 | 0.996  | 0.153  | 0.001  | 1.019 | 23 |
| 2412 | Ti2CoBi | Ti | Co | Bi | l21 | 0.260  | 0.122  | 6.517 | 219.272 | 0.030 | 0.502  | 0.502  | 1.080  | 0.045  | 2.129 | 22 |
| 2032 | Ru2RuSb | Ru | Ru | Sb | xa  | 0.000  | 0.379  | 6.281 | 219.062 | 0.225 | -0.281 | 0.195  | 0.195  | -0.009 | 0.100 | 29 |
| 1943 | Ru2IrPb | Ru | Ir | Pb | l21 | 0.425  | 0.594  | 6.386 | 218.840 | 0.115 | 0.271  | 0.271  | 0.197  | -0.012 | 0.727 | 29 |
| 1976 | Ru2NbPb | Ru | Nb | Pb | l21 | 1.397  | 0.162  | 6.480 | 218.771 | 0.810 | 0.356  | 0.356  | 0.085  | -0.006 | 0.791 | 25 |
| 831  | Mn2CoGe | Mn | Co | Ge | xa  | -0.915 | -0.213 | 5.727 | 218.581 | 1.000 | 2.814  | -0.746 | 0.894  | 0.014  | 2.976 | 27 |
| 473  | Cr2TiSn | Cr | Ti | Sn | l21 | 0.462  | 0.058  | 6.283 | 218.192 | 0.860 | 2.107  | 2.107  | -0.525 | -0.060 | 3.629 | 20 |
| 2541 | Ti2RhAl | Ti | Rh | Al | xa  | -0.496 | -0.562 | 6.257 | 218.111 | 1.000 | 0.567  | 1.188  | -0.062 | -0.015 | 1.678 | 20 |
| 103  | Co2MnBi | Co | Mn | Bi | l21 | 1.250  | 0.222  | 6.166 | 217.868 | 0.929 | 1.226  | 1.226  | 3.506  | -0.037 | 5.921 | 30 |
| 869  | Mn2FeSn | Mn | Fe | Sn | xa  | -0.670 | 0.032  | 6.027 | 217.335 | 0.965 | 2.983  | -2.118 | 1.116  | -0.026 | 1.955 | 26 |
| 2810 | V2RhGe  | V  | Rh | Ge | xa  | -0.576 | -0.272 | 6.036 | 216.622 | 0.808 | -0.391 | 1.043  | 0.136  | 0.006  | 0.794 | 23 |
| 2675 | V2CoB   | V  | Co | B  | l21 | 0.170  | 0.051  | 5.561 | 216.399 | 0.114 | 0.582  | 0.582  | 1.278  | 0.067  | 2.509 | 22 |
| 1624 | Rh2CoPb | Rh | Co | Pb | l21 | 0.416  | 0.179  | 6.298 | 215.852 | 0.863 | 0.263  | 0.263  | 1.849  | -0.019 | 2.356 | 31 |
| 837  | Mn2CrAl | Mn | Cr | Al | l21 | 0.411  | -0.229 | 5.714 | 215.776 | 0.854 | 1.015  | 1.015  | -0.964 | -0.008 | 1.058 | 23 |
| 985  | Mn2ScGe | Mn | Sc | Ge | l21 | 0.208  | -0.188 | 6.038 | 215.633 | 0.899 | 1.636  | 1.636  | -0.247 | -0.081 | 2.944 | 21 |
| 2673 | V2CoAl  | V  | Co | Al | xa  | -0.596 | -0.176 | 5.904 | 215.438 | 0.966 | -0.202 | 1.462  | 0.542  | -0.004 | 1.798 | 22 |
| 2901 | V2ZrSb  | V  | Zr | Sb | l21 | 0.351  | -0.033 | 6.484 | 214.328 | 0.389 | 0.605  | 0.605  | -0.067 | -0.015 | 1.128 | 19 |
| 879  | Mn2HfSi | Mn | Hf | Si | l21 | 1.201  | -0.420 | 5.958 | 214.216 | 0.975 | 1.099  | 1.099  | -0.144 | -0.039 | 2.015 | 22 |
| 30   | Co2CdPb | Co | Cd | Pb | l21 | 1.198  | 0.451  | 6.335 | 213.948 | 0.102 | 0.633  | 0.633  | -0.026 | -0.055 | 1.185 | 24 |

|      |         |    |    |    |     |        |        |       |         |       |        |        |        |        |       |    |
|------|---------|----|----|----|-----|--------|--------|-------|---------|-------|--------|--------|--------|--------|-------|----|
| 2754 | V2MoGa  | V  | Mo | Ga | l21 | 0.268  | -0.104 | 6.111 | 213.638 | 0.783 | 0.503  | 0.503  | -0.153 | -0.001 | 0.852 | 19 |
| 2680 | V2CoPb  | V  | Co | Pb | xa  | -0.470 | 0.404  | 6.221 | 212.828 | 0.554 | -0.571 | 1.107  | 0.380  | 0.028  | 0.944 | 23 |
| 201  | Co2TiB  | Co | Ti | B  | l21 | 1.092  | -0.209 | 5.473 | 212.748 | 0.973 | 0.551  | 0.551  | -0.109 | 0.022  | 1.015 | 25 |
| 643  | Fe2MoGa | Fe | Mo | Ga | l21 | 0.612  | -0.048 | 5.847 | 212.710 | 0.826 | 0.493  | 0.493  | -0.085 | -0.035 | 0.866 | 25 |
| 434  | Cr2RhGa | Cr | Rh | Ga | xa  | -0.991 | -0.150 | 6.006 | 212.531 | 0.899 | 2.489  | -2.468 | 0.086  | -0.030 | 0.077 | 24 |
| 1355 | Pd2CoB  | Pd | Co | B  | l21 | 0.410  | 0.420  | 5.772 | 212.180 | 0.561 | 0.028  | 0.028  | 1.690  | -0.023 | 1.723 | 32 |
| 487  | Cr2WB   | Cr | W  | B  | l21 | 0.011  | 0.366  | 5.712 | 212.022 | 0.319 | 1.425  | 1.425  | -0.291 | -0.051 | 2.508 | 21 |
| 614  | Fe2HfSb | Fe | Hf | Sb | l21 | 1.304  | -0.198 | 6.195 | 211.864 | 0.941 | 0.648  | 0.648  | -0.170 | -0.013 | 1.113 | 25 |
| 1096 | Ni2CoIn | Ni | Co | In | l21 | 0.023  | 0.080  | 5.945 | 211.826 | 0.807 | 0.174  | 0.174  | 1.612  | -0.046 | 1.914 | 32 |
| 138  | Co2NiGe | Co | Ni | Ge | l21 | 0.162  | -0.088 | 5.667 | 211.367 | 0.643 | 1.059  | 1.059  | 0.449  | -0.048 | 2.519 | 32 |
| 790  | Fe2ZrSb | Fe | Zr | Sb | l21 | 1.490  | -0.192 | 6.229 | 210.581 | 0.917 | 0.661  | 0.661  | -0.161 | -0.014 | 1.147 | 25 |
| 903  | Mn2MoAl | Mn | Mo | Al | l21 | 0.802  | -0.256 | 5.876 | 210.558 | 0.821 | 0.674  | 0.674  | -0.309 | -0.012 | 1.027 | 23 |
| 2611 | Ti2YGa  | Ti | Y  | Ga | xa  | -0.498 | -0.057 | 6.850 | 210.522 | 0.103 | 0.000  | 0.000  | 0.009  | 0.000  | 0.009 | 14 |
| 228  | Co2WPb  | Co | W  | Pb | l21 | 0.778  | 0.640  | 6.172 | 210.116 | 0.463 | 0.307  | 0.307  | 0.022  | 0.000  | 0.636 | 28 |
| 1157 | Ni2MnAs | Ni | Mn | As | l21 | 0.182  | -0.144 | 5.845 | 209.639 | 0.067 | 0.239  | 0.239  | 3.559  | 0.000  | 4.037 | 32 |
| 2796 | V2PtB   | V  | Pt | B  | xa  | -0.399 | 0.118  | 5.789 | 207.884 | 0.604 | -0.219 | 0.900  | 0.080  | -0.015 | 0.746 | 23 |
| 172  | Co2RhIn | Co | Rh | In | xa  | -0.170 | 0.079  | 6.080 | 206.899 | 0.632 | 1.863  | 1.463  | 0.417  | -0.086 | 3.657 | 30 |
| 2671 | V2CdSi  | V  | Cd | Si | l21 | 0.414  | 0.276  | 6.201 | 205.987 | 0.238 | 0.678  | 0.678  | 0.023  | -0.014 | 1.365 | 16 |
| 698  | Fe2RhGa | Fe | Rh | Ga | xa  | -0.232 | -0.097 | 5.915 | 205.692 | 0.319 | 2.403  | -2.349 | 0.209  | 0.055  | 0.318 | 28 |
| 173  | Co2RhPb | Co | Rh | Pb | l21 | 0.094  | 0.363  | 6.164 | 205.684 | 0.561 | 1.423  | 1.423  | 0.455  | -0.085 | 3.216 | 31 |
| 1500 | Pd2RuGa | Pd | Ru | Ga | xa  | -0.455 | -0.136 | 6.180 | 205.679 | 0.382 | 0.279  | 0.145  | 1.007  | -0.031 | 1.400 | 31 |
| 850  | Mn2CuB  | Mn | Cu | B  | l21 | 0.073  | 0.228  | 5.502 | 205.395 | 0.339 | 2.459  | 2.459  | 0.143  | -0.161 | 4.900 | 18 |
| 522  | Cr2ZrGa | Cr | Zr | Ga | l21 | 0.007  | 0.092  | 6.295 | 204.927 | 0.682 | 2.338  | 2.338  | -0.159 | -0.089 | 4.428 | 19 |
| 1440 | Pd2MoSn | Pd | Mo | Sn | xa  | -0.166 | -0.023 | 6.445 | 204.444 | 0.449 | 0.130  | 0.027  | 0.710  | 0.037  | 0.904 | 30 |
| 2570 | Ti2ScPb | Ti | Sc | Pb | xa  | -0.365 | 0.032  | 6.877 | 204.327 | 0.489 | 1.249  | 0.346  | 0.076  | -0.062 | 1.609 | 15 |
| 115  | Co2MoGa | Co | Mo | Ga | l21 | 0.551  | -0.059 | 5.885 | 204.196 | 0.133 | 1.141  | 1.141  | 0.450  | -0.011 | 2.721 | 27 |
| 1005 | Mn2VBi  | Mn | V  | Bi | l21 | 0.075  | 0.319  | 6.465 | 204.040 | 0.646 | 3.242  | 3.242  | -2.166 | -0.010 | 4.308 | 24 |
| 356  | Cr2IrBi | Cr | Ir | Bi | xa  | -0.778 | 0.464  | 6.463 | 203.969 | 0.519 | 3.326  | -2.738 | 0.169  | 0.025  | 0.782 | 26 |
| 2409 | Ti2CoAl | Ti | Co | Al | l21 | 0.082  | -0.282 | 6.180 | 203.509 | 0.065 | 0.233  | 0.233  | 1.405  | 0.032  | 1.903 | 20 |

|      |         |    |    |    |     |        |        |       |         |       |        |        |        |        |       |    |
|------|---------|----|----|----|-----|--------|--------|-------|---------|-------|--------|--------|--------|--------|-------|----|
| 2187 | Sc2FeSi | Sc | Fe | Si | l21 | 0.452  | -0.399 | 6.439 | 203.377 | 0.207 | -0.212 | -0.212 | 1.671  | 0.045  | 1.292 | 18 |
| 2859 | V2VSn   | V  | V  | Sn | xa  | 0.000  | 0.052  | 6.256 | 203.025 | 0.723 | -0.331 | 0.696  | 0.697  | 0.009  | 1.071 | 19 |
| 2711 | V2FeGe  | V  | Fe | Ge | xa  | -0.662 | -0.161 | 5.882 | 202.879 | 0.900 | -0.421 | 1.335  | 0.951  | -0.010 | 1.855 | 22 |
| 142  | Co2NiSi | Co | Ni | Si | l21 | 0.184  | -0.280 | 5.549 | 202.244 | 0.655 | 0.940  | 0.940  | 0.406  | -0.032 | 2.254 | 32 |
| 2648 | V2AgSb  | V  | Ag | Sb | l21 | 0.454  | 0.313  | 6.427 | 201.971 | 0.134 | 1.018  | 1.018  | -0.004 | -0.025 | 2.007 | 16 |
| 2827 | V2ScAl  | V  | Sc | Al | xa  | -0.795 | -0.012 | 6.402 | 201.476 | 0.527 | 1.659  | -1.363 | 0.159  | -0.001 | 0.454 | 16 |
| 2026 | Ru2RuB  | Ru | Ru | B  | l21 | 0.000  | 0.586  | 5.839 | 201.230 | 0.383 | 0.131  | 0.131  | 1.004  | 0.045  | 1.311 | 27 |
| 2070 | Ru2WB   | Ru | W  | B  | l21 | 0.983  | 0.420  | 5.914 | 201.081 | 0.716 | 0.182  | 0.182  | 0.047  | 0.005  | 0.416 | 25 |
| 342  | Cr2HfAl | Cr | Hf | Al | l21 | 0.293  | 0.046  | 6.284 | 201.040 | 0.644 | 2.269  | 2.269  | 0.080  | -0.049 | 4.569 | 19 |
| 721  | Fe2ScGe | Fe | Sc | Ge | l21 | 0.214  | -0.234 | 5.942 | 200.969 | 0.971 | 0.539  | 0.539  | -0.120 | -0.030 | 0.928 | 23 |
| 376  | Cr2MoAs | Cr | Mo | As | xa  | -0.001 | 0.176  | 6.033 | 200.380 | 0.456 | -1.774 | 2.012  | 0.550  | -0.048 | 0.740 | 23 |
| 1031 | Mn2YPb  | Mn | Y  | Pb | l21 | 0.405  | 0.166  | 6.842 | 200.353 | 0.292 | 0.000  | 0.000  | 0.006  | 0.000  | 0.006 | 21 |
| 1496 | Pd2RuAl | Pd | Ru | Al | xa  | -0.377 | -0.246 | 6.168 | 199.626 | 0.420 | 0.272  | 0.136  | 0.949  | -0.013 | 1.344 | 31 |
| 1093 | Ni2CoBi | Ni | Co | Bi | xa  | -0.150 | 0.315  | 6.050 | 199.507 | 0.194 | 0.026  | 0.048  | 0.694  | -0.019 | 0.749 | 34 |
| 2193 | Sc2HfGa | Sc | Hf | Ga | l21 | 0.004  | -0.072 | 6.955 | 198.249 | 0.286 | 0.373  | 0.373  | 0.895  | -0.030 | 1.611 | 13 |
| 2782 | V2NiSn  | V  | Ni | Sn | xa  | -0.353 | 0.086  | 6.178 | 198.084 | 0.750 | 0.977  | -1.086 | 0.183  | -0.047 | 0.027 | 24 |
| 1768 | Rh2RuSb | Rh | Ru | Sb | xa  | -0.443 | 0.060  | 6.294 | 197.213 | 0.288 | 0.301  | 0.268  | 0.602  | -0.010 | 1.161 | 31 |
| 932  | Mn2NiPb | Mn | Ni | Pb | xa  | -0.439 | 0.208  | 6.260 | 196.205 | 0.206 | 3.513  | -3.222 | 0.101  | 0.002  | 0.394 | 28 |
| 1829 | Rh2ZnBi | Rh | Zn | Bi | l21 | 0.955  | -0.107 | 6.440 | 194.477 | 0.286 | 0.098  | 0.098  | 0.001  | 0.008  | 0.205 | 25 |
| 709  | Fe2RuGa | Fe | Ru | Ga | xa  | -0.167 | 0.008  | 5.861 | 194.362 | 0.409 | 2.363  | -1.876 | 0.346  | 0.073  | 0.906 | 27 |
| 2635 | Ti2ZrIn | Ti | Zr | In | l21 | 0.036  | -0.044 | 6.778 | 194.342 | 0.121 | 0.103  | 0.103  | 0.223  | -0.009 | 0.420 | 15 |
| 2887 | V2ZnGe  | V  | Zn | Ge | l21 | 0.425  | 0.085  | 6.070 | 194.279 | 0.115 | 0.565  | 0.565  | 0.029  | 0.000  | 1.159 | 16 |
| 963  | Mn2RhGe | Mn | Rh | Ge | xa  | -1.310 | -0.285 | 5.911 | 193.911 | 0.998 | 3.160  | -0.589 | 0.315  | 0.029  | 2.915 | 27 |
| 2857 | V2VSb   | V  | V  | Sb | xa  | 0.000  | -0.002 | 6.243 | 192.979 | 0.553 | -0.545 | 1.135  | 1.135  | -0.007 | 1.718 | 20 |
| 1128 | Ni2FeGe | Ni | Fe | Ge | xa  | -0.007 | -0.130 | 5.716 | 192.342 | 0.205 | 0.492  | 0.217  | 2.219  | -0.048 | 2.880 | 32 |
| 2161 | Sc2CrGe | Sc | Cr | Ge | l21 | 0.295  | -0.178 | 6.673 | 191.869 | 0.553 | -0.178 | -0.178 | 3.213  | -0.021 | 2.836 | 16 |
| 603  | Fe2FeSb | Fe | Fe | Sb | xa  | 0.000  | 0.315  | 5.956 | 191.641 | 0.074 | -2.321 | 1.251  | 1.253  | -0.065 | 0.118 | 29 |
| 2462 | Ti2HfSi | Ti | Hf | Si | xa  | -0.009 | -0.204 | 6.471 | 191.599 | 0.449 | 1.047  | 0.248  | 0.147  | -0.027 | 1.415 | 16 |
| 46   | Co2CrAs | Co | Cr | As | xa  | -0.124 | 0.089  | 5.678 | 191.274 | 0.075 | 0.026  | 0.068  | -0.036 | 0.001  | 0.059 | 29 |

|      |         |    |    |    |     |        |        |       |         |       |        |        |        |        |       |    |
|------|---------|----|----|----|-----|--------|--------|-------|---------|-------|--------|--------|--------|--------|-------|----|
| 832  | Mn2CoIn | Mn | Co | In | xa  | -0.126 | 0.059  | 6.077 | 190.888 | 0.088 | 3.282  | -2.590 | 1.054  | -0.030 | 1.716 | 26 |
| 2434 | Ti2CuBi | Ti | Cu | Bi | l21 | 1.099  | 0.108  | 6.591 | 190.720 | 0.034 | 0.079  | 0.079  | 0.000  | 0.004  | 0.162 | 14 |
| 840  | Mn2CrBi | Mn | Cr | Bi | l21 | 0.103  | 0.410  | 6.490 | 190.112 | 0.820 | 3.303  | 3.303  | -3.402 | -0.041 | 3.163 | 25 |
| 43   | Co2CoSi | Co | Co | Si | xa  | 0.000  | -0.244 | 5.568 | 190.103 | 0.619 | 1.507  | 1.223  | 1.223  | -0.013 | 3.940 | 31 |
| 2165 | Sc2CrSi | Sc | Cr | Si | l21 | 0.164  | -0.154 | 6.573 | 189.736 | 0.583 | -0.175 | -0.175 | 3.006  | -0.016 | 2.640 | 16 |
| 1111 | Ni2CrSn | Ni | Cr | Sn | l21 | 0.521  | -0.035 | 6.041 | 189.725 | 0.240 | 0.192  | 0.192  | 2.994  | -0.080 | 3.298 | 30 |
| 1029 | Mn2YGe  | Mn | Y  | Ge | l21 | 0.207  | 0.003  | 6.431 | 189.579 | 0.304 | 0.000  | 0.000  | 0.010  | 0.000  | 0.010 | 21 |
| 160  | Co2PtGe | Co | Pt | Ge | l21 | 0.244  | -0.016 | 5.918 | 189.567 | 0.653 | 1.264  | 1.264  | 0.157  | -0.047 | 2.638 | 32 |
| 2559 | Ti2RuPb | Ti | Ru | Pb | xa  | -0.364 | -0.061 | 6.517 | 189.162 | 1.000 | 0.546  | 1.227  | -0.127 | -0.008 | 1.638 | 20 |
| 918  | Mn2NbGa | Mn | Nb | Ga | l21 | 0.926  | -0.236 | 5.999 | 189.046 | 0.971 | 1.223  | 1.223  | -0.434 | -0.055 | 1.957 | 22 |
| 474  | Cr2VAl  | Cr | V  | Al | l21 | 0.197  | -0.059 | 5.936 | 188.887 | 0.132 | 1.666  | 1.666  | -0.791 | -0.021 | 2.520 | 20 |
| 1357 | Pd2CoGa | Pd | Co | Ga | l21 | 0.269  | -0.259 | 6.072 | 187.803 | 0.707 | 0.029  | 0.029  | 1.746  | -0.028 | 1.776 | 32 |
| 460  | Cr2ScSb | Cr | Sc | Sb | l21 | 0.185  | 0.097  | 6.373 | 187.639 | 0.954 | 1.965  | 1.965  | -0.092 | -0.070 | 3.768 | 20 |
| 158  | Co2PtBi | Co | Pt | Bi | l21 | 0.648  | 0.291  | 6.279 | 187.600 | 0.746 | 1.429  | 1.429  | 0.171  | -0.045 | 2.984 | 33 |
| 989  | Mn2ScSi | Mn | Sc | Si | l21 | 0.515  | -0.313 | 5.941 | 187.480 | 0.864 | 1.598  | 1.598  | -0.179 | -0.065 | 2.952 | 21 |
| 200  | Co2TiAs | Co | Ti | As | l21 | 0.647  | -0.312 | 5.843 | 187.179 | 0.817 | 0.767  | 0.767  | -0.046 | 0.046  | 1.534 | 27 |
| 283  | Cr2AuPb | Cr | Au | Pb | l21 | 0.027  | 0.441  | 6.689 | 186.612 | 0.707 | 3.472  | 3.472  | 0.037  | -0.194 | 6.787 | 17 |
| 317  | Cr2CrSb | Cr | Cr | Sb | l21 | 0.000  | 0.275  | 6.120 | 186.397 | 0.979 | 1.688  | 1.688  | -2.378 | -0.051 | 0.947 | 23 |
| 2538 | Ti2PtSb | Ti | Pt | Sb | l21 | 0.921  | -0.454 | 6.565 | 186.384 | 0.125 | 0.682  | 0.682  | 0.053  | -0.006 | 1.411 | 23 |
| 2714 | V2FeSb  | V  | Fe | Sb | xa  | -0.111 | 0.056  | 6.094 | 186.372 | 0.934 | -0.491 | 0.778  | 0.684  | -0.001 | 0.970 | 23 |
| 2783 | V2PdAl  | V  | Pd | Al | xa  | -0.723 | -0.184 | 6.110 | 184.963 | 0.929 | -0.606 | 1.339  | 0.049  | 0.006  | 0.788 | 23 |
| 321  | Cr2CuAs | Cr | Cu | As | l21 | 0.031  | 0.243  | 5.938 | 184.913 | 0.161 | 2.203  | 2.203  | 0.120  | -0.065 | 4.461 | 18 |
| 976  | Mn2RuPb | Mn | Ru | Pb | xa  | -0.442 | 0.273  | 6.324 | 184.594 | 0.254 | 3.546  | -2.889 | 0.265  | 0.066  | 0.988 | 26 |
| 58   | Co2CuB  | Co | Cu | B  | l21 | 0.410  | 0.272  | 5.330 | 184.577 | 0.742 | 0.591  | 0.591  | 0.093  | -0.050 | 1.225 | 22 |
| 2776 | V2NiGa  | V  | Ni | Ga | xa  | -0.149 | -0.058 | 5.929 | 184.130 | 0.780 | -0.158 | 0.984  | 0.175  | 0.017  | 1.018 | 23 |
| 986  | Mn2ScIn | Mn | Sc | In | l21 | 0.184  | -0.010 | 6.518 | 183.777 | 0.328 | 3.093  | 3.093  | -0.267 | -0.187 | 5.732 | 20 |
| 1626 | Rh2CoSi | Rh | Co | Si | l21 | 0.928  | -0.354 | 5.887 | 183.435 | 0.903 | 0.294  | 0.294  | 1.752  | -0.003 | 2.337 | 31 |
| 21   | Co2AuSi | Co | Au | Si | l21 | 0.594  | 0.056  | 5.884 | 183.351 | 0.757 | 0.871  | 0.871  | 0.001  | -0.034 | 1.709 | 23 |
| 553  | Fe2CdB  | Fe | Cd | B  | xa  | -0.143 | 0.794  | 5.812 | 183.214 | 0.243 | 2.427  | 2.134  | -0.014 | -0.021 | 4.526 | 21 |

|      |         |    |    |    |     |        |        |       |         |       |        |        |        |        |       |    |
|------|---------|----|----|----|-----|--------|--------|-------|---------|-------|--------|--------|--------|--------|-------|----|
| 2452 | Ti2FeSn | Ti | Fe | Sn | l21 | 0.162  | -0.169 | 6.425 | 183.007 | 0.285 | -0.116 | -0.116 | 2.244  | 0.050  | 2.062 | 20 |
| 1172 | Ni2MoGe | Ni | Mo | Ge | xa  | -0.386 | -0.025 | 5.919 | 182.938 | 0.261 | 0.196  | 0.071  | 0.249  | 0.024  | 0.540 | 30 |
| 110  | Co2MnSn | Co | Mn | Sn | l21 | 1.334  | -0.132 | 5.976 | 182.903 | 0.771 | 0.960  | 0.960  | 3.206  | -0.127 | 4.999 | 29 |
| 399  | Cr2NiB  | Cr | Ni | B  | xa  | -0.069 | 0.241  | 5.433 | 182.851 | 0.948 | 1.333  | -0.782 | 0.472  | 0.002  | 1.025 | 25 |
| 2329 | Sc2VSb  | Sc | V  | Sb | l21 | 0.141  | -0.179 | 6.850 | 182.452 | 0.960 | -0.103 | -0.103 | 1.977  | -0.033 | 1.738 | 16 |
| 2707 | V2FeAs  | V  | Fe | As | xa  | -0.354 | -0.092 | 5.845 | 182.429 | 0.854 | -0.312 | 0.629  | 0.648  | -0.001 | 0.964 | 23 |
| 945  | Mn2PdSi | Mn | Pd | Si | xa  | -0.987 | -0.292 | 5.962 | 182.310 | 0.263 | 3.337  | -2.538 | 0.069  | 0.040  | 0.908 | 28 |
| 441  | Cr2RuAl | Cr | Ru | Al | xa  | -0.960 | -0.151 | 5.937 | 182.163 | 0.906 | -1.516 | 2.158  | 0.212  | 0.002  | 0.856 | 23 |
| 54   | Co2CrSi | Co | Cr | Si | xa  | -0.004 | -0.162 | 5.577 | 181.999 | 0.449 | 0.091  | -0.113 | 0.056  | 0.006  | 0.040 | 28 |
| 957  | Mn2PtSn | Mn | Pt | Sn | xa  | -0.373 | -0.207 | 6.361 | 181.865 | 0.037 | 3.566  | -3.426 | 0.034  | 0.011  | 0.185 | 28 |
| 20   | Co2AuSb | Co | Au | Sb | l21 | 1.070  | 0.188  | 6.184 | 181.435 | 0.112 | 0.779  | 0.779  | -0.026 | -0.018 | 1.514 | 24 |
| 990  | Mn2ScSn | Mn | Sc | Sn | l21 | 0.456  | -0.114 | 6.465 | 181.280 | 0.488 | 2.973  | 2.973  | -0.346 | -0.136 | 5.464 | 21 |
| 56   | Co2CuAl | Co | Cu | Al | l21 | 0.363  | -0.138 | 5.675 | 180.930 | 0.862 | 0.643  | 0.643  | 0.078  | -0.027 | 1.337 | 22 |
| 962  | Mn2RhGa | Mn | Rh | Ga | xa  | -0.646 | -0.368 | 5.954 | 180.770 | 0.198 | 3.333  | -2.104 | 0.304  | 0.039  | 1.572 | 26 |
| 2328 | Sc2VPb  | Sc | V  | Pb | l21 | 0.304  | 0.018  | 7.006 | 180.747 | 0.771 | 0.047  | 0.047  | 2.376  | -0.104 | 2.366 | 15 |
| 2391 | Ti2AuGa | Ti | Au | Ga | l21 | 0.607  | -0.338 | 6.468 | 180.655 | 0.060 | 0.661  | 0.661  | 0.047  | -0.015 | 1.354 | 12 |
| 1049 | Mn2ZrBi | Mn | Zr | Bi | l21 | 0.883  | 0.096  | 6.621 | 180.017 | 0.412 | 3.033  | 3.033  | -0.658 | -0.047 | 5.361 | 23 |
| 366  | Cr2MnB  | Cr | Mn | B  | xa  | -0.353 | 0.061  | 5.414 | 179.779 | 0.043 | -0.583 | 0.988  | 0.899  | -0.028 | 1.276 | 22 |
| 426  | Cr2PtPb | Cr | Pt | Pb | xa  | -0.207 | 0.287  | 6.525 | 179.608 | 0.149 | 3.455  | -3.285 | 0.065  | -0.007 | 0.228 | 26 |
| 338  | Cr2FePb | Cr | Fe | Pb | xa  | -0.294 | 0.598  | 6.201 | 179.326 | 0.936 | 2.763  | -2.570 | -0.145 | -0.033 | 0.015 | 24 |
| 762  | Fe2YB   | Fe | Y  | B  | xa  | -0.590 | 0.451  | 6.053 | 179.195 | 0.296 | 0.000  | 0.000  | 0.002  | 0.000  | 0.002 | 22 |
| 883  | Mn2IrB  | Mn | Ir | B  | xa  | -1.650 | -0.025 | 5.595 | 178.759 | 0.850 | 2.597  | -0.772 | 0.076  | 0.053  | 1.954 | 26 |
| 835  | Mn2CoSi | Mn | Co | Si | xa  | -0.848 | -0.429 | 5.608 | 178.693 | 1.000 | 2.627  | -0.500 | 0.850  | 0.011  | 2.988 | 27 |
| 167  | Co2RhAs | Co | Rh | As | xa  | -0.034 | 0.109  | 5.874 | 178.453 | 0.480 | 1.603  | -0.840 | 0.162  | -0.006 | 0.919 | 32 |
| 2807 | V2RhB   | V  | Rh | B  | xa  | -0.710 | 0.019  | 5.725 | 177.980 | 0.152 | -0.058 | 1.344  | 0.182  | -0.027 | 1.441 | 22 |
| 667  | Fe2NiIn | Fe | Ni | In | xa  | -0.042 | 0.237  | 6.031 | 177.853 | 0.473 | 2.585  | -2.287 | 0.150  | 0.027  | 0.475 | 29 |
| 57   | Co2CuAs | Co | Cu | As | l21 | 0.886  | 0.037  | 5.695 | 177.847 | 0.223 | 0.483  | 0.483  | -0.027 | -0.007 | 0.932 | 24 |
| 849  | Mn2CuAs | Mn | Cu | As | xa  | -0.041 | 0.061  | 5.957 | 177.345 | 0.360 | 3.271  | -2.352 | 0.030  | 0.062  | 1.011 | 20 |
| 1682 | Rh2IrSn | Rh | Ir | Sn | xa  | -0.084 | 0.016  | 6.321 | 177.331 | 0.023 | 0.017  | 0.025  | 0.026  | -0.001 | 0.067 | 31 |



|      |         |    |    |    |     |        |        |       |         |       |        |        |        |        |       |    |
|------|---------|----|----|----|-----|--------|--------|-------|---------|-------|--------|--------|--------|--------|-------|----|
| 2216 | Sc2MnGe | Sc | Mn | Ge | l21 | 0.504  | -0.343 | 6.621 | 176.319 | 0.824 | -0.283 | -0.283 | 3.107  | 0.046  | 2.587 | 17 |
| 438  | Cr2RhSb | Cr | Rh | Sb | xa  | -1.016 | 0.039  | 6.207 | 176.307 | 0.970 | 2.987  | -1.474 | 0.330  | 0.027  | 1.870 | 26 |
| 2027 | Ru2RuBi | Ru | Ru | Bi | l21 | 0.000  | 0.683  | 6.400 | 175.971 | 0.377 | -0.139 | -0.139 | 0.332  | 0.010  | 0.064 | 29 |
| 1105 | Ni2CrGa | Ni | Cr | Ga | l21 | 0.406  | -0.155 | 5.786 | 175.768 | 0.082 | 0.291  | 0.291  | 2.580  | -0.068 | 3.094 | 29 |
| 2442 | Ti2FeAl | Ti | Fe | Al | l21 | 0.135  | -0.263 | 6.184 | 175.751 | 0.449 | -0.201 | -0.201 | 1.413  | 0.012  | 1.023 | 19 |
| 723  | Fe2ScPb | Fe | Sc | Pb | l21 | 0.761  | 0.187  | 6.417 | 175.692 | 0.846 | 2.158  | 2.158  | -0.463 | -0.091 | 3.762 | 23 |
| 1716 | Rh2NiAl | Rh | Ni | Al | l21 | 0.839  | -0.487 | 5.944 | 175.462 | 0.650 | 0.507  | 0.507  | 0.862  | -0.012 | 1.864 | 31 |
| 2864 | V2WGa   | V  | W  | Ga | l21 | 0.472  | -0.059 | 6.125 | 174.950 | 0.738 | 0.508  | 0.508  | -0.126 | 0.001  | 0.891 | 19 |
| 466  | Cr2TiBi | Cr | Ti | Bi | l21 | 0.525  | 0.341  | 6.350 | 174.478 | 0.782 | 1.821  | 1.821  | -0.704 | -0.038 | 2.900 | 21 |
| 640  | Fe2MoAs | Fe | Mo | As | xa  | -0.455 | 0.092  | 5.954 | 174.271 | 0.099 | 2.434  | 1.817  | -0.302 | 0.050  | 3.999 | 27 |
| 2539 | Ti2PtSi | Ti | Pt | Si | l21 | 0.351  | -0.564 | 6.298 | 174.195 | 0.001 | 0.408  | 0.408  | 0.071  | -0.002 | 0.885 | 22 |
| 5    | Co2AgGa | Co | Ag | Ga | l21 | 0.006  | 0.185  | 5.946 | 173.929 | 0.709 | 1.084  | 1.084  | 0.040  | -0.098 | 2.110 | 22 |
| 880  | Mn2HfSn | Mn | Hf | Sn | l21 | 1.022  | -0.157 | 6.278 | 173.703 | 0.996 | 1.165  | 1.165  | -0.254 | -0.072 | 2.004 | 22 |
| 2856 | V2VPb   | V  | V  | Pb | l21 | 0.001  | 0.372  | 6.340 | 173.535 | 0.532 | 0.810  | 0.810  | -0.433 | 0.004  | 1.191 | 19 |
| 62   | Co2CuIn | Co | Cu | In | l21 | 0.244  | 0.228  | 5.951 | 173.121 | 0.721 | 0.905  | 0.905  | 0.060  | -0.111 | 1.759 | 22 |
| 610  | Fe2HfGa | Fe | Hf | Ga | l21 | 0.707  | -0.280 | 6.012 | 172.930 | 0.868 | 0.556  | 0.556  | -0.124 | -0.036 | 0.952 | 23 |
| 948  | Mn2PtAs | Mn | Pt | As | xa  | -0.087 | -0.123 | 6.194 | 172.826 | 0.116 | 3.622  | -3.177 | 0.107  | 0.057  | 0.609 | 29 |
| 2784 | V2PdAs  | V  | Pd | As | l21 | 0.686  | -0.143 | 6.108 | 172.704 | 0.003 | 0.233  | 0.233  | -0.017 | -0.008 | 0.441 | 25 |
| 101  | Co2MnAs | Co | Mn | As | l21 | 0.823  | -0.115 | 5.780 | 172.609 | 0.334 | 1.095  | 1.095  | 3.368  | 0.058  | 5.616 | 30 |
| 444  | Cr2RuBi | Cr | Ru | Bi | xa  | -1.104 | 0.468  | 6.355 | 172.174 | 0.978 | 3.009  | -2.261 | 0.095  | 0.028  | 0.871 | 25 |
| 2367 | Sc2ZrB  | Sc | Zr | B  | xa  | -0.246 | 0.478  | 6.548 | 171.953 | 0.187 | 0.040  | 0.018  | 0.029  | -0.002 | 0.085 | 13 |
| 109  | Co2MnSi | Co | Mn | Si | l21 | 1.051  | -0.467 | 5.618 | 171.875 | 1.000 | 1.029  | 1.029  | 2.997  | -0.029 | 5.026 | 29 |
| 1104 | Ni2CrBi | Ni | Cr | Bi | l21 | 0.417  | 0.282  | 6.229 | 171.381 | 0.239 | 0.075  | 0.075  | 3.304  | -0.051 | 3.403 | 31 |
| 506  | Cr2YSn  | Cr | Y  | Sn | xa  | -0.341 | 0.149  | 6.913 | 171.247 | 0.249 | 0.000  | 0.000  | 0.008  | 0.000  | 0.008 | 19 |
| 696  | Fe2RhB  | Fe | Rh | B  | xa  | -0.709 | 0.269  | 5.561 | 170.790 | 0.492 | 2.115  | -1.951 | 0.153  | 0.075  | 0.392 | 28 |
| 1901 | Ru2CrSi | Ru | Cr | Si | l21 | 1.726  | -0.394 | 5.912 | 170.769 | 0.527 | -0.113 | -0.113 | 2.137  | 0.008  | 1.919 | 26 |
| 1020 | Mn2WPb  | Mn | W  | Pb | l21 | 0.389  | 0.575  | 6.345 | 170.227 | 0.721 | 2.696  | 2.696  | -0.817 | -0.053 | 4.522 | 24 |
| 2719 | V2HfB   | V  | Hf | B  | xa  | -0.774 | 0.264  | 5.984 | 169.964 | 0.074 | -0.045 | 0.114  | -0.011 | -0.002 | 0.056 | 17 |
| 388  | Cr2NbB  | Cr | Nb | B  | xa  | -0.080 | 0.350  | 5.762 | 169.836 | 0.127 | -0.232 | 0.862  | 0.137  | -0.013 | 0.754 | 20 |

|      |         |    |    |    |     |        |        |       |         |       |        |        |        |        |       |    |
|------|---------|----|----|----|-----|--------|--------|-------|---------|-------|--------|--------|--------|--------|-------|----|
| 74   | Co2FePb | Co | Fe | Pb | l21 | 1.013  | 0.342  | 6.090 | 169.800 | 0.727 | 1.429  | 1.429  | 2.989  | -0.048 | 5.799 | 30 |
| 220  | Co2VSn  | Co | V  | Sn | l21 | 0.894  | -0.065 | 6.007 | 169.652 | 1.000 | 1.057  | 1.057  | 0.894  | -0.039 | 2.969 | 27 |
| 783  | Fe2ZrAs | Fe | Zr | As | l21 | 0.918  | -0.188 | 6.011 | 169.359 | 0.982 | 0.628  | 0.628  | -0.148 | -0.002 | 1.106 | 25 |
| 113  | Co2MoB  | Co | Mo | B  | xa  | -0.511 | 0.232  | 5.543 | 169.249 | 0.758 | 0.700  | 0.081  | -0.135 | 0.024  | 0.670 | 27 |
| 1008 | Mn2VIn  | Mn | V  | In | l21 | 0.640  | 0.010  | 6.235 | 168.624 | 0.055 | 2.984  | 2.984  | -1.753 | -0.059 | 4.156 | 22 |
| 798  | Mn2AgGe | Mn | Ag | Ge | xa  | -0.018 | 0.127  | 6.233 | 168.602 | 0.170 | 3.548  | -3.135 | 0.017  | 0.048  | 0.478 | 19 |
| 2480 | Ti2MnGe | Ti | Mn | Ge | l21 | 0.334  | -0.357 | 6.164 | 168.383 | 0.121 | -0.394 | -0.394 | 1.525  | 0.026  | 0.763 | 19 |
| 2423 | Ti2CrBi | Ti | Cr | Bi | l21 | 0.106  | 0.245  | 6.542 | 168.291 | 0.176 | -0.563 | -0.563 | 1.275  | -0.017 | 0.132 | 19 |
| 312  | Cr2CrBi | Cr | Cr | Bi | l21 | 0.001  | 0.612  | 6.537 | 168.266 | 0.675 | 3.233  | 3.233  | -3.258 | -0.074 | 3.134 | 23 |
| 1920 | Ru2FeIn | Ru | Fe | In | l21 | 0.621  | 0.185  | 6.216 | 167.956 | 0.695 | 0.192  | 0.192  | 2.902  | -0.005 | 3.281 | 27 |
| 839  | Mn2CrB  | Mn | Cr | B  | l21 | 0.431  | -0.053 | 5.361 | 167.687 | 0.656 | 0.750  | 0.750  | -0.472 | -0.026 | 1.002 | 23 |
| 341  | Cr2FeSn | Cr | Fe | Sn | xa  | -0.270 | 0.260  | 6.065 | 166.873 | 0.963 | -2.371 | 2.137  | 0.216  | 0.031  | 0.013 | 24 |
| 500  | Cr2YGa  | Cr | Y  | Ga | xa  | -0.893 | 0.079  | 6.629 | 166.261 | 0.574 | 0.000  | 0.000  | 0.008  | 0.000  | 0.008 | 18 |
| 193  | Co2ScGe | Co | Sc | Ge | l21 | 1.219  | -0.451 | 5.955 | 166.199 | 0.928 | 0.605  | 0.605  | -0.120 | -0.002 | 1.088 | 25 |
| 295  | Cr2CdSb | Cr | Cd | Sb | xa  | -0.105 | 0.488  | 6.742 | 165.563 | 0.036 | 3.588  | -3.375 | 0.029  | 0.030  | 0.272 | 19 |
| 2574 | Ti2TiAl | Ti | Ti | Al | xa  | 0.000  | -0.156 | 6.458 | 165.517 | 0.279 | 1.067  | 0.235  | 0.235  | -0.020 | 1.517 | 15 |
| 369  | Cr2MnGe | Cr | Mn | Ge | l21 | 0.004  | -0.036 | 5.900 | 165.475 | 0.903 | 1.865  | 1.865  | -2.823 | -0.078 | 0.829 | 23 |
| 1862 | Ru2AuBi | Ru | Au | Bi | l21 | 0.811  | 0.480  | 6.517 | 165.021 | 0.242 | 0.226  | 0.226  | 0.048  | -0.015 | 0.485 | 22 |
| 469  | Cr2TiIn | Cr | Ti | In | xa  | -0.008 | 0.248  | 6.329 | 164.319 | 0.897 | -1.839 | 2.615  | -0.009 | 0.033  | 0.800 | 19 |
| 1983 | Ru2NiBi | Ru | Ni | Bi | l21 | 0.545  | 0.435  | 6.292 | 164.112 | 0.308 | 0.490  | 0.490  | 0.769  | -0.019 | 1.730 | 31 |
| 298  | Cr2CoAl | Cr | Co | Al | xa  | -1.117 | -0.080 | 5.771 | 164.003 | 0.958 | 1.550  | -1.690 | 0.270  | -0.015 | 0.115 | 24 |
| 1276 | Ni2VSn  | Ni | V  | Sn | l21 | 0.484  | -0.111 | 6.031 | 163.895 | 0.458 | -0.010 | -0.010 | 0.613  | -0.026 | 0.567 | 29 |
| 649  | Fe2MoSn | Fe | Mo | Sn | l21 | 0.504  | 0.193  | 6.091 | 163.064 | 0.297 | 1.167  | 1.167  | -0.194 | -0.071 | 2.069 | 26 |
| 2815 | V2RhSn  | V  | Rh | Sn | xa  | -0.698 | -0.136 | 6.267 | 162.644 | 0.825 | -0.679 | 1.339  | 0.119  | 0.043  | 0.822 | 23 |
| 251  | Co2ZnSb | Co | Zn | Sb | l21 | 1.450  | 0.023  | 6.013 | 162.634 | 0.332 | 0.718  | 0.718  | -0.021 | -0.002 | 1.413 | 25 |
| 647  | Fe2MoSb | Fe | Mo | Sb | l21 | 0.531  | 0.246  | 6.090 | 162.574 | 0.655 | 1.343  | 1.343  | 0.159  | -0.020 | 2.825 | 27 |
| 2031 | Ru2RuPb | Ru | Ru | Pb | l21 | 0.000  | 0.633  | 6.376 | 162.199 | 0.286 | 0.493  | 0.493  | 1.264  | -0.009 | 2.241 | 28 |
| 719  | Fe2ScBi | Fe | Sc | Bi | l21 | 0.880  | 0.141  | 6.412 | 162.144 | 0.683 | 1.954  | 1.954  | -0.454 | -0.048 | 3.406 | 24 |
| 195  | Co2ScPb | Co | Sc | Pb | l21 | 1.399  | -0.084 | 6.300 | 161.279 | 0.567 | 0.694  | 0.694  | -0.159 | -0.038 | 1.191 | 25 |

|      |         |    |    |    |     |        |        |       |         |       |        |        |        |        |       |    |
|------|---------|----|----|----|-----|--------|--------|-------|---------|-------|--------|--------|--------|--------|-------|----|
| 202  | Co2TiBi | Co | Ti | Bi | l21 | 0.943  | 0.069  | 6.212 | 161.089 | 0.823 | 0.836  | 0.836  | -0.029 | 0.021  | 1.664 | 27 |
| 967  | Mn2RhSi | Mn | Rh | Si | xa  | -1.378 | -0.469 | 5.800 | 161.015 | 1.000 | 3.026  | -0.422 | 0.299  | 0.022  | 2.925 | 27 |
| 310  | Cr2CrAs | Cr | Cr | As | l21 | 0.000  | 0.095  | 5.833 | 160.399 | 0.865 | 1.399  | 1.399  | -1.822 | -0.051 | 0.925 | 23 |
| 1947 | Ru2MnAl | Ru | Mn | Al | l21 | 1.612  | -0.415 | 5.962 | 160.382 | 0.577 | -0.203 | -0.203 | 2.516  | 0.003  | 2.113 | 26 |
| 447  | Cr2RuIn | Cr | Ru | In | xa  | -0.767 | 0.251  | 6.250 | 160.320 | 0.909 | -2.414 | 2.924  | 0.239  | 0.062  | 0.811 | 23 |
| 785  | Fe2ZrBi | Fe | Zr | Bi | l21 | 1.220  | 0.132  | 6.434 | 160.013 | 0.428 | 1.776  | 1.776  | -0.399 | -0.034 | 3.119 | 25 |
| 2688 | V2CrGa  | V  | Cr | Ga | l21 | 0.058  | -0.051 | 5.959 | 159.814 | 0.704 | 0.610  | 0.610  | -0.374 | 0.015  | 0.861 | 19 |
| 470  | Cr2TiPb | Cr | Ti | Pb | l21 | 0.351  | 0.376  | 6.379 | 159.667 | 0.815 | 2.204  | 2.204  | -0.690 | -0.062 | 3.656 | 20 |
| 2115 | Sc2AgBi | Sc | Ag | Bi | l21 | 1.575  | -0.341 | 7.122 | 159.564 | 0.072 | 0.314  | 0.314  | 0.014  | -0.011 | 0.631 | 12 |
| 2775 | V2NiBi  | V  | Ni | Bi | xa  | -0.009 | 0.415  | 6.307 | 159.245 | 0.505 | 1.282  | -0.926 | 0.374  | -0.016 | 0.714 | 25 |
| 302  | Cr2CoGa | Cr | Co | Ga | xa  | -0.934 | 0.004  | 5.799 | 159.085 | 0.888 | 1.768  | -1.969 | 0.373  | -0.060 | 0.112 | 24 |
| 710  | Fe2RuGe | Fe | Ru | Ge | xa  | -0.254 | 0.054  | 5.871 | 158.964 | 0.454 | 2.175  | -2.016 | 0.208  | 0.066  | 0.433 | 28 |
| 2726 | V2HfSi  | V  | Hf | Si | xa  | -0.150 | -0.161 | 6.245 | 158.547 | 0.261 | -0.601 | 0.968  | -0.241 | -0.002 | 0.124 | 18 |
| 2766 | V2NbGe  | V  | Nb | Ge | l21 | 0.276  | -0.141 | 6.178 | 158.313 | 0.219 | 0.316  | 0.316  | -0.063 | -0.006 | 0.563 | 19 |
| 1630 | Rh2CrB  | Rh | Cr | B  | l21 | 1.277  | 0.138  | 5.752 | 158.269 | 0.792 | 0.214  | 0.214  | 2.467  | 0.001  | 2.896 | 27 |
| 672  | Fe2PdAl | Fe | Pd | Al | xa  | -0.231 | -0.124 | 5.956 | 158.184 | 0.269 | 2.562  | -2.045 | 0.046  | 0.025  | 0.588 | 29 |
| 1601 | Rh2AuIn | Rh | Au | In | l21 | 0.531  | -0.148 | 6.410 | 158.106 | 0.341 | 0.158  | 0.158  | 0.026  | -0.014 | 0.328 | 22 |
| 2877 | V2YIn   | V  | Y  | In | xa  | -0.523 | 0.212  | 6.875 | 157.909 | 0.645 | 0.000  | 0.000  | 0.004  | 0.000  | 0.004 | 16 |
| 2647 | V2AgPb  | V  | Ag | Pb | l21 | 0.087  | 0.574  | 6.546 | 157.825 | 0.721 | 1.341  | 1.341  | -0.011 | -0.046 | 2.625 | 15 |
| 2790 | V2PdPb  | V  | Pd | Pb | xa  | -0.138 | 0.266  | 6.469 | 157.394 | 0.735 | 1.647  | -1.648 | 0.128  | -0.046 | 0.081 | 24 |
| 958  | Mn2RhAl | Mn | Rh | Al | xa  | -1.760 | -0.467 | 5.920 | 157.110 | 0.188 | 3.202  | -1.747 | 0.337  | 0.013  | 1.805 | 26 |
| 468  | Cr2TiGe | Cr | Ti | Ge | l21 | 0.207  | -0.094 | 6.009 | 157.037 | 0.119 | 1.769  | 1.769  | -0.341 | -0.051 | 3.146 | 20 |
| 2233 | Sc2NbAl | Sc | Nb | Al | l21 | 0.064  | -0.044 | 6.857 | 156.845 | 0.725 | 0.131  | 0.131  | 1.034  | -0.010 | 1.286 | 14 |
| 1892 | Ru2CrAl | Ru | Cr | Al | l21 | 1.572  | -0.333 | 5.960 | 156.733 | 0.930 | -0.127 | -0.127 | 1.303  | -0.005 | 1.044 | 25 |
| 1974 | Ru2NbGe | Ru | Nb | Ge | l21 | 1.332  | -0.245 | 6.216 | 156.708 | 0.749 | 0.317  | 0.317  | 0.064  | 0.006  | 0.704 | 25 |
| 340  | Cr2FeSi | Cr | Fe | Si | xa  | -0.368 | -0.222 | 5.613 | 156.698 | 0.114 | -0.054 | 0.057  | 0.026  | 0.000  | 0.029 | 24 |
| 2263 | Sc2PdSb | Sc | Pd | Sb | l21 | 1.580  | -0.754 | 6.879 | 156.668 | 0.254 | 0.267  | 0.267  | 0.034  | -0.017 | 0.551 | 21 |
| 886  | Mn2IrGe | Mn | Ir | Ge | xa  | -1.136 | -0.214 | 6.037 | 156.277 | 0.494 | 3.286  | -2.903 | 0.085  | 0.051  | 0.519 | 27 |
| 648  | Fe2MoSi | Fe | Mo | Si | l21 | 0.047  | -0.167 | 5.773 | 156.128 | 0.812 | 0.955  | 0.955  | -0.066 | -0.010 | 1.834 | 26 |

|      |         |    |    |    |     |        |        |       |         |       |        |        |        |        |       |    |
|------|---------|----|----|----|-----|--------|--------|-------|---------|-------|--------|--------|--------|--------|-------|----|
| 1019 | Mn2WIn  | Mn | W  | In | l21 | 1.015  | 0.196  | 6.110 | 156.106 | 0.814 | 0.643  | 0.643  | -0.284 | -0.021 | 0.981 | 23 |
| 1791 | Rh2TiSi | Rh | Ti | Si | l21 | 1.406  | -0.777 | 6.063 | 156.102 | 0.178 | 0.146  | 0.146  | 0.040  | 0.017  | 0.349 | 26 |
| 2651 | V2AuAl  | V  | Au | Al | xa  | -0.451 | -0.011 | 6.218 | 155.870 | 0.921 | 1.296  | -1.282 | 0.051  | -0.012 | 0.053 | 14 |
| 60   | Co2CuGa | Co | Cu | Ga | l21 | 0.052  | -0.038 | 5.691 | 155.703 | 0.843 | 0.618  | 0.618  | 0.071  | -0.068 | 1.239 | 22 |
| 2162 | Sc2CrIn | Sc | Cr | In | l21 | 0.267  | -0.067 | 6.960 | 155.550 | 0.436 | -0.090 | -0.090 | 3.480  | -0.139 | 3.161 | 15 |
| 289  | Cr2CdB  | Cr | Cd | B  | xa  | -0.099 | 0.907  | 5.960 | 155.305 | 0.188 | 2.706  | -2.634 | 0.035  | 0.006  | 0.113 | 17 |
| 2657 | V2AuIn  | V  | Au | In | xa  | -0.122 | 0.208  | 6.485 | 155.297 | 0.592 | 1.771  | -1.735 | 0.064  | -0.073 | 0.027 | 14 |
| 925  | Mn2NiAl | Mn | Ni | Al | xa  | -0.623 | -0.318 | 5.786 | 155.262 | 0.565 | 2.927  | -2.064 | 0.300  | 0.003  | 1.166 | 27 |
| 847  | Mn2CrSn | Mn | Cr | Sn | xa  | -0.196 | 0.102  | 6.115 | 155.181 | 0.902 | 3.234  | -1.088 | -2.147 | 0.045  | 0.044 | 24 |
| 2896 | V2ZrBi  | V  | Zr | Bi | l21 | 0.261  | 0.262  | 6.626 | 155.166 | 0.415 | 0.960  | 0.960  | -0.102 | -0.025 | 1.793 | 19 |
| 803  | Mn2AgSn | Mn | Ag | Sn | xa  | -0.054 | 0.133  | 6.471 | 155.117 | 0.220 | 3.662  | -3.260 | 0.012  | 0.046  | 0.460 | 19 |
| 217  | Co2VPb  | Co | V  | Pb | l21 | 0.687  | 0.302  | 6.107 | 155.055 | 1.000 | 1.028  | 1.028  | 0.947  | -0.042 | 2.961 | 27 |
| 2113 | Sc2AgAs | Sc | Ag | As | l21 | 2.185  | -0.560 | 6.778 | 154.634 | 0.115 | 0.341  | 0.341  | 0.018  | -0.011 | 0.689 | 12 |
| 405  | Cr2NiSb | Cr | Ni | Sb | xa  | -0.641 | 0.179  | 6.111 | 154.263 | 0.312 | 2.920  | -2.009 | 0.299  | 0.021  | 1.231 | 27 |
| 2017 | Ru2RhGa | Ru | Rh | Ga | l21 | 0.133  | 0.027  | 6.085 | 153.676 | 0.536 | 0.020  | 0.020  | 0.093  | 0.001  | 0.134 | 28 |
| 2895 | V2ZrB   | V  | Zr | B  | xa  | -0.577 | 0.276  | 6.016 | 153.151 | 0.143 | -0.077 | 0.161  | -0.018 | -0.003 | 0.063 | 17 |
| 349  | Cr2HfPb | Cr | Hf | Pb | l21 | 0.680  | 0.390  | 6.510 | 153.112 | 0.814 | 2.062  | 2.062  | -0.257 | -0.087 | 3.780 | 20 |
| 542  | Fe2AuB  | Fe | Au | B  | l21 | 0.192  | 0.671  | 5.779 | 152.140 | 0.554 | 2.317  | 2.317  | 0.040  | -0.163 | 4.511 | 20 |
| 331  | Cr2FeAl | Cr | Fe | Al | xa  | -0.969 | -0.069 | 5.748 | 152.061 | 0.916 | -1.078 | 1.386  | 0.688  | -0.002 | 0.994 | 23 |
| 440  | Cr2RhSn | Cr | Rh | Sn | xa  | -1.195 | -0.007 | 6.251 | 151.928 | 0.688 | 3.039  | -2.393 | 0.285  | -0.011 | 0.920 | 25 |
| 1885 | Ru2CoGa | Ru | Co | Ga | l21 | 0.330  | 0.002  | 5.941 | 151.899 | 0.343 | 0.134  | 0.134  | 1.271  | 0.011  | 1.550 | 28 |
| 2313 | Sc2TiBi | Sc | Ti | Bi | l21 | 0.292  | -0.085 | 7.115 | 151.673 | 0.433 | 0.266  | 0.266  | 1.487  | -0.057 | 1.962 | 15 |
| 368  | Cr2MnGa | Cr | Mn | Ga | xa  | -0.189 | -0.045 | 5.824 | 151.596 | 0.946 | -1.517 | 1.798  | 1.657  | -0.003 | 1.935 | 22 |
| 2517 | Ti2NiSi | Ti | Ni | Si | l21 | 0.751  | -0.442 | 6.100 | 151.559 | 0.198 | 0.293  | 0.293  | 0.262  | -0.001 | 0.847 | 22 |
| 133  | Co2NiAl | Co | Ni | Al | xa  | -0.057 | -0.229 | 5.634 | 151.299 | 0.400 | 1.520  | 1.347  | 0.218  | -0.014 | 3.071 | 31 |
| 1012 | Mn2VSn  | Mn | V  | Sn | l21 | 0.458  | -0.067 | 6.012 | 150.939 | 0.920 | 0.843  | 0.843  | -0.627 | -0.022 | 1.037 | 23 |
| 274  | Cr2AgSi | Cr | Ag | Si | xa  | -0.133 | 0.312  | 6.107 | 150.425 | 0.044 | 2.996  | -2.401 | 0.072  | 0.020  | 0.687 | 17 |
| 2759 | V2MoSi  | V  | Mo | Si | l21 | 0.012  | -0.244 | 6.009 | 150.361 | 0.064 | 0.252  | 0.252  | -0.013 | -0.005 | 0.486 | 20 |
| 332  | Cr2FeAs | Cr | Fe | As | xa  | -0.053 | 0.076  | 5.743 | 150.309 | 0.958 | 1.793  | -0.830 | -0.014 | 0.022  | 0.971 | 25 |

|      |         |    |    |    |     |        |        |       |         |       |        |        |        |        |       |    |
|------|---------|----|----|----|-----|--------|--------|-------|---------|-------|--------|--------|--------|--------|-------|----|
| 1364 | Pd2CrAl | Pd | Cr | Al | l21 | 1.212  | -0.422 | 6.179 | 150.131 | 0.361 | 0.142  | 0.142  | 3.275  | -0.021 | 3.538 | 29 |
| 2247 | Sc2NiBi | Sc | Ni | Bi | l21 | 1.448  | -0.312 | 6.870 | 150.129 | 0.485 | 0.181  | 0.181  | 0.055  | -0.011 | 0.406 | 21 |
| 2758 | V2MoSb  | V  | Mo | Sb | xa  | -0.055 | 0.075  | 6.328 | 150.097 | 0.086 | -0.419 | 1.529  | 0.325  | -0.007 | 1.428 | 21 |
| 728  | Fe2TiAs | Fe | Ti | As | l21 | 0.566  | -0.326 | 5.791 | 149.445 | 0.999 | 0.654  | 0.654  | -0.226 | -0.005 | 1.077 | 25 |
| 73   | Co2FeIn | Co | Fe | In | l21 | 0.278  | 0.147  | 5.963 | 149.252 | 0.408 | 0.712  | 0.712  | 3.005  | -0.045 | 4.384 | 29 |
| 2571 | Ti2ScSb | Ti | Sc | Sb | xa  | -0.319 | -0.220 | 6.737 | 148.764 | 0.167 | 1.040  | 0.294  | 0.042  | -0.031 | 1.345 | 16 |
| 408  | Cr2PdAl | Cr | Pd | Al | xa  | -1.041 | -0.143 | 6.066 | 148.384 | 0.489 | 2.909  | -2.277 | 0.243  | 0.003  | 0.878 | 25 |
| 1794 | Rh2VAs  | Rh | V  | As | xa  | -0.234 | -0.148 | 6.097 | 147.949 | 0.303 | -0.007 | 0.084  | 0.264  | -0.002 | 0.339 | 28 |
| 117  | Co2MoIn | Co | Mo | In | l21 | 1.072  | 0.184  | 6.107 | 147.852 | 0.939 | 1.210  | 1.210  | 0.603  | -0.041 | 2.982 | 27 |
| 2160 | Sc2CrGa | Sc | Cr | Ga | l21 | 0.369  | -0.149 | 6.722 | 147.642 | 0.421 | -0.066 | -0.066 | 3.335  | -0.095 | 3.108 | 15 |
| 2215 | Sc2MnGa | Sc | Mn | Ga | l21 | 0.335  | -0.270 | 6.648 | 147.566 | 0.487 | -0.261 | -0.261 | 3.015  | -0.061 | 2.432 | 16 |
| 91   | Co2IrB  | Co | Ir | B  | xa  | -0.986 | 0.307  | 5.551 | 147.284 | 0.061 | -0.668 | 1.171  | 0.015  | -0.035 | 0.483 | 30 |
| 373  | Cr2MnSi | Cr | Mn | Si | xa  | -0.308 | -0.271 | 5.649 | 146.858 | 0.493 | -0.599 | 0.881  | 0.804  | -0.015 | 1.071 | 23 |
| 660  | Fe2NbSn | Fe | Nb | Sn | l21 | 1.209  | -0.046 | 6.150 | 146.726 | 0.878 | 0.678  | 0.678  | -0.233 | -0.048 | 1.075 | 25 |
| 2567 | Ti2ScGa | Ti | Sc | Ga | xa  | -0.378 | -0.166 | 6.630 | 146.682 | 0.136 | 1.400  | 0.870  | 0.251  | -0.062 | 2.459 | 14 |
| 2484 | Ti2MnSi | Ti | Mn | Si | l21 | 0.180  | -0.428 | 6.057 | 146.390 | 0.008 | -0.289 | -0.289 | 0.714  | 0.010  | 0.146 | 19 |
| 655  | Fe2NbGe | Fe | Nb | Ge | l21 | 0.876  | -0.176 | 5.930 | 145.960 | 0.979 | 0.626  | 0.626  | -0.192 | -0.016 | 1.044 | 25 |
| 2721 | V2HfGa  | V  | Hf | Ga | xa  | -0.380 | -0.043 | 6.366 | 145.883 | 0.405 | -1.140 | 1.466  | -0.250 | 0.004  | 0.080 | 17 |
| 564  | Fe2CoB  | Fe | Co | B  | xa  | -0.373 | 0.084  | 5.330 | 145.468 | 0.034 | 2.434  | 0.898  | 0.898  | -0.024 | 4.206 | 28 |
| 881  | Mn2IrAl | Mn | Ir | Al | xa  | -1.518 | -0.482 | 5.920 | 145.367 | 1.000 | 3.043  | -1.353 | 0.237  | 0.015  | 1.942 | 26 |
| 403  | Cr2NiIn | Cr | Ni | In | xa  | -0.767 | 0.218  | 6.156 | 145.191 | 0.123 | 2.968  | -2.656 | 0.402  | -0.057 | 0.657 | 25 |
| 607  | Fe2HfAs | Fe | Hf | As | l21 | 0.617  | -0.196 | 5.984 | 145.188 | 0.986 | 0.604  | 0.604  | -0.156 | -0.001 | 1.051 | 25 |
| 566  | Fe2CoGa | Fe | Co | Ga | xa  | -0.658 | 0.006  | 5.708 | 145.179 | 0.064 | 2.599  | -1.163 | 1.007  | 0.040  | 2.483 | 28 |
| 389  | Cr2NbBi | Cr | Nb | Bi | l21 | 0.496  | 0.482  | 6.387 | 144.933 | 0.943 | 1.278  | 1.278  | -0.560 | -0.041 | 1.955 | 22 |
| 773  | Fe2ZnB  | Fe | Zn | B  | l21 | 0.319  | 0.316  | 5.424 | 144.712 | 0.666 | 1.342  | 1.342  | -0.013 | -0.107 | 2.564 | 21 |
| 383  | Cr2MoSb | Cr | Mo | Sb | l21 | 0.093  | 0.295  | 6.160 | 144.544 | 0.733 | 0.766  | 0.766  | -0.342 | -0.021 | 1.169 | 23 |
| 161  | Co2PtIn | Co | Pt | In | l21 | 0.456  | 0.024  | 6.114 | 144.107 | 0.138 | 1.421  | 1.421  | 0.200  | -0.116 | 2.926 | 31 |
| 1597 | Rh2AuB  | Rh | Au | B  | l21 | 0.690  | 0.580  | 5.998 | 144.079 | 0.016 | 0.039  | 0.039  | 0.008  | -0.002 | 0.084 | 22 |
| 2589 | Ti2VGa  | Ti | V  | Ga | l21 | 0.372  | -0.199 | 6.285 | 143.584 | 0.594 | -0.002 | -0.002 | 1.002  | -0.029 | 0.969 | 16 |

|      |         |    |    |    |     |        |        |       |         |       |        |        |        |        |       |    |
|------|---------|----|----|----|-----|--------|--------|-------|---------|-------|--------|--------|--------|--------|-------|----|
| 1966 | Ru2MoSb | Ru | Mo | Sb | xa  | -0.095 | 0.293  | 6.337 | 143.566 | 0.187 | 0.772  | 0.233  | -0.080 | 0.019  | 0.944 | 27 |
| 69   | Co2FeB  | Co | Fe | B  | l21 | 0.891  | 0.056  | 5.352 | 143.058 | 0.510 | 1.148  | 1.148  | 2.694  | -0.016 | 4.974 | 29 |
| 2641 | V2AgAs  | V  | Ag | As | l21 | 0.888  | 0.211  | 6.186 | 143.035 | 0.487 | 0.449  | 0.449  | -0.004 | -0.008 | 0.886 | 16 |
| 323  | Cr2CuBi | Cr | Cu | Bi | xa  | -0.495 | 0.510  | 6.495 | 142.531 | 0.091 | 3.431  | -3.263 | 0.022  | -0.025 | 0.165 | 18 |
| 462  | Cr2ScSn | Cr | Sc | Sn | xa  | -0.212 | 0.067  | 6.620 | 142.412 | 1.000 | 3.414  | -3.033 | 0.347  | 0.058  | 0.786 | 19 |
| 2148 | Sc2CoBi | Sc | Co | Bi | l21 | 1.080  | -0.195 | 6.866 | 142.271 | 0.299 | -0.177 | -0.177 | 0.922  | 0.041  | 0.609 | 20 |
| 199  | Co2TiAl | Co | Ti | Al | l21 | 1.677  | -0.611 | 5.824 | 141.768 | 0.985 | 0.602  | 0.602  | -0.129 | -0.002 | 1.073 | 25 |
| 504  | Cr2YSb  | Cr | Y  | Sb | xa  | -0.034 | 0.210  | 6.959 | 141.752 | 0.713 | 0.000  | 0.000  | 0.007  | 0.000  | 0.007 | 20 |
| 16   | Co2AuGa | Co | Au | Ga | l21 | 0.172  | 0.051  | 5.977 | 141.737 | 0.674 | 1.225  | 1.225  | 0.041  | -0.090 | 2.401 | 22 |
| 2021 | Ru2RhSb | Ru | Rh | Sb | l21 | 0.492  | 0.168  | 6.277 | 141.651 | 0.278 | 0.230  | 0.230  | 0.173  | -0.006 | 0.627 | 30 |
| 2745 | V2MnIn  | V  | Mn | In | xa  | -0.202 | 0.146  | 6.237 | 141.351 | 0.451 | -1.089 | 1.446  | 2.534  | -0.018 | 2.873 | 20 |
| 455  | Cr2ScBi | Cr | Sc | Bi | xa  | -0.316 | 0.317  | 6.835 | 141.300 | 0.116 | 3.606  | -3.258 | 0.320  | 0.051  | 0.719 | 20 |
| 927  | Mn2NiB  | Mn | Ni | B  | xa  | -0.290 | 0.044  | 5.399 | 141.285 | 0.549 | 2.541  | -1.238 | 0.374  | 0.037  | 1.714 | 27 |
| 1502 | Pd2RuIn | Pd | Ru | In | xa  | -0.154 | -0.032 | 6.381 | 141.249 | 0.720 | 0.327  | 0.135  | 1.257  | -0.042 | 1.677 | 31 |
| 2833 | V2ScIn  | V  | Sc | In | xa  | -0.664 | 0.103  | 6.623 | 141.013 | 0.523 | 1.820  | -1.828 | 0.168  | -0.033 | 0.127 | 16 |
| 2668 | V2CdIn  | V  | Cd | In | xa  | -0.074 | 0.428  | 6.610 | 140.669 | 0.002 | 1.880  | -1.792 | 0.021  | -0.043 | 0.066 | 15 |
| 593  | Fe2CuSi | Fe | Cu | Si | l21 | 0.027  | -0.101 | 5.602 | 140.627 | 0.696 | 1.249  | 1.249  | 0.150  | -0.072 | 2.576 | 21 |
| 2239 | Sc2NbIn | Sc | Nb | In | l21 | 0.294  | -0.049 | 7.004 | 140.429 | 0.570 | 0.096  | 0.096  | 0.871  | -0.025 | 1.038 | 14 |
| 549  | Fe2AuSi | Fe | Au | Si | l21 | 0.491  | 0.107  | 5.950 | 140.322 | 0.605 | 2.101  | 2.101  | 0.062  | -0.093 | 4.171 | 21 |
| 179  | Co2RuB  | Co | Ru | B  | xa  | -0.873 | 0.277  | 5.461 | 140.013 | 0.487 | 0.384  | 0.100  | 0.090  | 0.011  | 0.585 | 29 |
| 971  | Mn2RuB  | Mn | Ru | B  | xa  | -1.367 | 0.019  | 5.565 | 139.882 | 0.896 | 2.529  | -1.452 | -0.112 | 0.073  | 1.038 | 25 |
| 804  | Mn2AuAl | Mn | Au | Al | xa  | -0.476 | -0.195 | 6.187 | 139.659 | 0.471 | 3.398  | -3.194 | 0.025  | 0.008  | 0.237 | 18 |
| 2735 | V2IrPb  | V  | Ir | Pb | xa  | -0.288 | 0.252  | 6.378 | 139.599 | 0.790 | -0.829 | 1.467  | 0.103  | 0.045  | 0.786 | 23 |
| 2561 | Ti2RuSi | Ti | Ru | Si | xa  | -0.386 | -0.554 | 6.136 | 139.524 | 1.000 | 0.525  | 1.219  | -0.060 | -0.021 | 1.663 | 20 |
| 2097 | Ru2ZnPb | Ru | Zn | Pb | l21 | 1.050  | 0.331  | 6.353 | 139.522 | 0.403 | 0.175  | 0.175  | -0.003 | -0.006 | 0.341 | 22 |
| 210  | Co2VAl  | Co | V  | Al | l21 | 1.221  | -0.413 | 5.743 | 138.709 | 0.965 | 0.912  | 0.912  | 0.251  | -0.008 | 2.067 | 26 |
| 385  | Cr2MoSn | Cr | Mo | Sn | l21 | 0.359  | 0.252  | 6.206 | 138.680 | 0.860 | 1.362  | 1.362  | -0.696 | -0.031 | 1.997 | 22 |
| 476  | Cr2VB   | Cr | V  | B  | xa  | -0.020 | 0.124  | 5.516 | 138.458 | 0.243 | -0.152 | 0.499  | 0.498  | -0.013 | 0.832 | 20 |
| 297  | Cr2CdSn | Cr | Cd | Sn | l21 | 0.049  | 0.412  | 6.689 | 138.186 | 0.076 | 3.519  | 3.519  | -0.017 | -0.159 | 6.862 | 18 |

|      |         |    |    |    |     |        |        |       |         |       |        |        |        |        |       |    |
|------|---------|----|----|----|-----|--------|--------|-------|---------|-------|--------|--------|--------|--------|-------|----|
| 1126 | Ni2FeBi | Ni | Fe | Bi | l21 | 0.123  | 0.297  | 6.171 | 137.946 | 0.600 | 0.281  | 0.281  | 2.962  | 0.003  | 3.527 | 33 |
| 528  | Cr2ZrSn | Cr | Zr | Sn | l21 | 0.826  | 0.059  | 6.449 | 137.721 | 0.957 | 2.073  | 2.073  | -0.314 | -0.091 | 3.741 | 20 |
| 1619 | Rh2CoB  | Rh | Co | B  | l21 | 1.252  | 0.194  | 5.678 | 137.412 | 0.842 | 0.576  | 0.576  | 1.855  | -0.007 | 3.000 | 30 |
| 1647 | Rh2CuSb | Rh | Cu | Sb | l21 | 1.033  | -0.264 | 6.209 | 137.383 | 0.558 | 0.089  | 0.089  | -0.003 | 0.006  | 0.181 | 24 |
| 124  | Co2NbB  | Co | Nb | B  | l21 | 0.210  | 0.138  | 5.667 | 137.312 | 1.000 | 0.998  | 0.998  | -0.055 | 0.052  | 1.993 | 26 |
| 216  | Co2VIn  | Co | V  | In | l21 | 1.073  | -0.002 | 5.999 | 136.606 | 0.890 | 0.975  | 0.975  | 0.143  | -0.051 | 2.042 | 26 |
| 984  | Mn2ScGa | Mn | Sc | Ga | l21 | 0.058  | -0.139 | 6.126 | 136.149 | 0.934 | 2.132  | 2.132  | -0.205 | -0.139 | 3.920 | 20 |
| 2119 | Sc2AgPb | Sc | Ag | Pb | l21 | 1.591  | -0.329 | 7.076 | 135.504 | 0.087 | 0.296  | 0.296  | 0.013  | -0.030 | 0.575 | 11 |
| 374  | Cr2MnSn | Cr | Mn | Sn | l21 | 0.169  | 0.179  | 6.192 | 134.925 | 0.913 | 2.095  | 2.095  | -3.272 | -0.062 | 0.856 | 23 |
| 608  | Fe2HfB  | Fe | Hf | B  | l21 | 0.048  | 0.131  | 5.685 | 134.203 | 0.842 | 0.509  | 0.509  | -0.070 | -0.019 | 0.929 | 23 |
| 2850 | V2VAs   | V  | V  | As | xa  | 0.000  | -0.151 | 5.967 | 133.991 | 0.012 | -0.134 | 0.405  | 0.405  | -0.005 | 0.671 | 20 |
| 646  | Fe2MoPb | Fe | Mo | Pb | l21 | 0.509  | 0.573  | 6.204 | 133.734 | 0.244 | 1.563  | 1.563  | -0.313 | -0.072 | 2.741 | 26 |
| 467  | Cr2TiGa | Cr | Ti | Ga | xa  | -0.261 | -0.034 | 6.017 | 133.584 | 0.683 | -0.827 | 1.659  | -0.001 | 0.000  | 0.831 | 19 |
| 154  | Co2PdSn | Co | Pd | Sn | l21 | 0.073  | 0.015  | 6.098 | 133.560 | 0.705 | 1.273  | 1.273  | 0.142  | -0.096 | 2.592 | 32 |
| 659  | Fe2NbSi | Fe | Nb | Si | l21 | 0.700  | -0.352 | 5.843 | 133.467 | 0.975 | 0.603  | 0.603  | -0.168 | -0.005 | 1.033 | 25 |
| 821  | Mn2CdIn | Mn | Cd | In | l21 | 0.098  | 0.170  | 6.562 | 133.403 | 0.272 | 3.484  | 3.484  | -0.057 | -0.184 | 6.727 | 19 |
| 2130 | Sc2AuPb | Sc | Au | Pb | l21 | 1.842  | -0.532 | 7.059 | 133.326 | 0.289 | 0.252  | 0.252  | 0.025  | -0.019 | 0.510 | 11 |
| 1938 | Ru2IrB  | Ru | Ir | B  | l21 | 0.193  | 0.635  | 5.889 | 133.294 | 0.011 | 0.021  | 0.021  | 0.069  | 0.002  | 0.113 | 28 |
| 1953 | Ru2MnIn | Ru | Mn | In | l21 | 0.919  | 0.048  | 6.221 | 133.282 | 0.826 | -0.354 | -0.354 | 2.915  | -0.031 | 2.176 | 26 |
| 2731 | V2IrBi  | V  | Ir | Bi | l21 | 0.008  | 0.318  | 6.479 | 133.276 | 0.227 | 1.647  | 1.647  | 0.111  | 0.010  | 3.415 | 24 |
| 2089 | Ru2YSn  | Ru | Y  | Sn | l21 | 1.845  | -0.306 | 6.601 | 132.902 | 0.000 | 0.000  | 0.000  | 0.000  | 0.000  | 0.000 | 23 |
| 1684 | Rh2MnAs | Rh | Mn | As | l21 | 0.909  | -0.250 | 6.129 | 132.220 | 0.288 | 0.632  | 0.632  | 3.766  | 0.070  | 5.100 | 30 |
| 418  | Cr2PdSn | Cr | Pd | Sn | xa  | -0.515 | 0.041  | 6.376 | 132.180 | 0.306 | 3.317  | -3.013 | 0.087  | -0.019 | 0.372 | 26 |
| 1721 | Rh2NiGe | Rh | Ni | Ge | l21 | 0.915  | -0.293 | 5.962 | 131.794 | 0.847 | 0.245  | 0.245  | 0.569  | -0.012 | 1.047 | 32 |
| 1686 | Rh2MnBi | Rh | Mn | Bi | l21 | 0.902  | -0.066 | 6.455 | 131.790 | 0.334 | 0.557  | 0.557  | 3.919  | 0.033  | 5.066 | 30 |
| 2722 | V2HfGe  | V  | Hf | Ge | xa  | -0.199 | -0.081 | 6.325 | 131.769 | 0.077 | -0.723 | 1.146  | -0.286 | -0.002 | 0.135 | 18 |
| 859  | Mn2FeAl | Mn | Fe | Al | xa  | -0.406 | -0.226 | 5.731 | 131.366 | 0.982 | 2.616  | -1.698 | 0.091  | 0.007  | 1.016 | 25 |
| 980  | Mn2ScAl | Mn | Sc | Al | l21 | 0.405  | -0.175 | 6.144 | 131.337 | 0.833 | 2.126  | 2.126  | -0.180 | -0.061 | 4.011 | 20 |
| 860  | Mn2FeAs | Mn | Fe | As | xa  | -0.340 | -0.124 | 5.705 | 131.110 | 0.998 | 2.730  | -0.636 | 0.822  | 0.033  | 2.949 | 27 |

|      |         |    |    |    |     |        |        |       |         |       |        |        |        |        |       |    |
|------|---------|----|----|----|-----|--------|--------|-------|---------|-------|--------|--------|--------|--------|-------|----|
| 2839 | V2TiAs  | V  | Ti | As | xa  | -0.287 | -0.212 | 6.079 | 131.083 | 0.327 | 0.045  | -0.083 | 0.154  | 0.000  | 0.116 | 19 |
| 488  | Cr2WBi  | Cr | W  | Bi | l21 | 0.378  | 0.740  | 6.283 | 130.778 | 0.595 | 0.709  | 0.709  | -0.344 | -0.013 | 1.061 | 23 |
| 2819 | V2RuBi  | V  | Ru | Bi | xa  | -0.509 | 0.303  | 6.367 | 130.746 | 0.790 | -0.745 | 1.333  | 0.195  | 0.024  | 0.807 | 23 |
| 254  | Co2ZrAl | Co | Zr | Al | l21 | 1.758  | -0.525 | 6.060 | 130.724 | 0.964 | 0.599  | 0.599  | -0.095 | -0.003 | 1.100 | 25 |
| 854  | Mn2CuIn | Mn | Cu | In | xa  | -0.376 | 0.065  | 6.215 | 130.609 | 0.289 | 3.417  | -3.211 | 0.022  | -0.037 | 0.191 | 18 |
| 1913 | Ru2CuSn | Ru | Cu | Sn | l21 | 0.489  | 0.153  | 6.208 | 130.593 | 0.405 | 0.464  | 0.464  | 0.131  | -0.021 | 1.038 | 21 |
| 1388 | Pd2FeB  | Pd | Fe | B  | l21 | 0.416  | 0.352  | 5.831 | 130.538 | 0.443 | 0.090  | 0.090  | 2.996  | -0.036 | 3.140 | 31 |
| 76   | Co2FeSi | Co | Fe | Si | l21 | 0.386  | -0.347 | 5.610 | 130.537 | 0.365 | 1.336  | 1.336  | 2.800  | 0.010  | 5.482 | 30 |
| 577  | Fe2CrGa | Fe | Cr | Ga | l21 | 0.100  | -0.042 | 5.674 | 130.433 | 0.976 | -0.142 | -0.142 | 1.259  | -0.018 | 0.957 | 25 |
| 1867 | Ru2AuSb | Ru | Au | Sb | l21 | 1.117  | 0.232  | 6.397 | 130.143 | 0.035 | 0.103  | 0.103  | 0.024  | -0.005 | 0.225 | 22 |
| 2463 | Ti2HfSn | Ti | Hf | Sn | l21 | 0.170  | -0.145 | 6.718 | 130.023 | 0.102 | 0.042  | 0.042  | 0.046  | -0.003 | 0.127 | 16 |
| 2756 | V2MoIn  | V  | Mo | In | l21 | 0.374  | 0.172  | 6.328 | 129.394 | 0.581 | 0.625  | 0.625  | -0.250 | 0.006  | 1.006 | 19 |
| 198  | Co2ScSn | Co | Sc | Sn | l21 | 0.686  | -0.387 | 6.201 | 129.382 | 0.763 | 0.650  | 0.650  | -0.139 | -0.032 | 1.129 | 25 |
| 72   | Co2FeGe | Co | Fe | Ge | l21 | 0.441  | -0.154 | 5.727 | 129.259 | 0.389 | 1.382  | 1.382  | 2.877  | 0.004  | 5.645 | 30 |
| 208  | Co2TiSi | Co | Ti | Si | l21 | 1.416  | -0.654 | 5.743 | 129.241 | 0.919 | 1.017  | 1.017  | -0.019 | 0.030  | 2.045 | 26 |
| 2518 | Ti2NiSn | Ti | Ni | Sn | l21 | 0.216  | -0.183 | 6.408 | 129.031 | 0.009 | 0.002  | 0.002  | 0.001  | 0.000  | 0.005 | 22 |
| 2588 | Ti2VBi  | Ti | V  | Bi | xa  | -0.035 | 0.101  | 6.550 | 128.599 | 0.918 | -0.526 | -1.235 | 1.853  | -0.013 | 0.079 | 18 |
| 1622 | Rh2CoGe | Rh | Co | Ge | l21 | 0.722  | -0.194 | 5.983 | 128.193 | 0.928 | 0.290  | 0.290  | 1.767  | -0.007 | 2.340 | 31 |
| 412  | Cr2PdGa | Cr | Pd | Ga | xa  | -0.778 | -0.072 | 6.091 | 127.374 | 0.410 | 3.026  | -2.464 | 0.228  | 0.000  | 0.790 | 25 |
| 2383 | Ti2AgPb | Ti | Ag | Pb | l21 | 0.759  | 0.112  | 6.723 | 127.187 | 0.217 | 0.317  | 0.317  | 0.002  | -0.002 | 0.634 | 13 |
| 556  | Fe2CdGe | Fe | Cd | Ge | l21 | 0.868  | 0.341  | 6.144 | 127.125 | 0.668 | 2.294  | 2.294  | -0.036 | -0.068 | 4.484 | 22 |
| 597  | Fe2FeB  | Fe | Fe | B  | xa  | 0.000  | 0.111  | 5.308 | 126.585 | 0.778 | 2.236  | 0.390  | 0.391  | 0.013  | 3.030 | 27 |
| 307  | Cr2CoSi | Cr | Co | Si | xa  | -0.771 | -0.215 | 5.647 | 126.498 | 0.953 | 1.392  | -0.882 | 0.549  | -0.011 | 1.048 | 25 |
| 1631 | Rh2CrBi | Rh | Cr | Bi | l21 | 1.049  | 0.100  | 6.446 | 126.343 | 0.264 | 0.468  | 0.468  | 3.363  | 0.031  | 4.330 | 29 |
| 44   | Co2CoSn | Co | Co | Sn | xa  | 0.000  | 0.110  | 5.936 | 125.843 | 0.716 | 1.605  | 1.278  | 1.278  | -0.078 | 4.083 | 31 |
| 2672 | V2CdSn  | V  | Cd | Sn | l21 | 0.386  | 0.365  | 6.667 | 125.814 | 0.542 | 2.289  | 2.289  | 0.020  | -0.064 | 4.534 | 16 |
| 561  | Fe2CdSn | Fe | Cd | Sn | l21 | 0.932  | 0.353  | 6.345 | 125.692 | 0.712 | 2.271  | 2.271  | -0.049 | -0.138 | 4.355 | 22 |
| 71   | Co2FeGa | Co | Fe | Ga | l21 | 1.287  | -0.235 | 5.705 | 125.476 | 0.670 | 1.179  | 1.179  | 2.795  | -0.094 | 5.059 | 29 |
| 1954 | Ru2MnPb | Ru | Mn | Pb | l21 | 1.652  | 0.253  | 6.318 | 125.152 | 0.899 | -0.096 | -0.096 | 3.263  | -0.016 | 3.055 | 27 |



|      |         |    |    |    |     |        |        |       |         |       |        |        |        |        |       |    |
|------|---------|----|----|----|-----|--------|--------|-------|---------|-------|--------|--------|--------|--------|-------|----|
| 612  | Fe2HfIn | Fe | Hf | In | 121 | 0.818  | -0.048 | 6.239 | 124.846 | 0.939 | 0.605  | 0.605  | -0.185 | -0.060 | 0.965 | 23 |
| 1161 | Ni2MnGe | Ni | Mn | Ge | 121 | 0.318  | -0.256 | 5.795 | 124.766 | 0.076 | 0.255  | 0.255  | 3.442  | -0.039 | 3.913 | 31 |
| 214  | Co2VGa  | Co | V  | Ga | 121 | 0.967  | -0.306 | 5.751 | 124.390 | 1.000 | 0.930  | 0.930  | 0.198  | -0.025 | 2.033 | 26 |
| 748  | Fe2VSn  | Fe | V  | Sn | 121 | 0.353  | 0.004  | 5.972 | 124.254 | 0.818 | 0.705  | 0.705  | -0.394 | -0.050 | 0.966 | 25 |
| 2389 | Ti2AuB  | Ti | Au | B  | 121 | 1.293  | 0.087  | 6.167 | 124.247 | 0.052 | 0.625  | 0.625  | 0.062  | -0.037 | 1.275 | 12 |
| 1435 | Pd2MoGe | Pd | Mo | Ge | xa  | -0.822 | -0.082 | 6.245 | 124.186 | 0.252 | 0.075  | 0.026  | 0.337  | 0.014  | 0.452 | 30 |
| 707  | Fe2RuB  | Fe | Ru | B  | xa  | -1.298 | 0.173  | 5.506 | 124.144 | 0.646 | 2.321  | 0.648  | 0.036  | 0.027  | 3.032 | 27 |
| 493  | Cr2WSb  | Cr | W  | Sb | 121 | 0.599  | 0.329  | 6.152 | 123.838 | 0.246 | 0.595  | 0.595  | -0.245 | -0.014 | 0.931 | 23 |
| 364  | Cr2MnAl | Cr | Mn | Al | xa  | -0.361 | -0.124 | 5.810 | 123.777 | 0.976 | -1.411 | 1.738  | 1.612  | -0.012 | 1.927 | 22 |
| 1054 | Mn2ZrSb | Mn | Zr | Sb | 121 | 1.061  | -0.178 | 6.260 | 123.703 | 0.967 | 0.604  | 0.604  | -0.152 | -0.024 | 1.032 | 23 |
| 48   | Co2CrBi | Co | Cr | Bi | 121 | 1.139  | 0.359  | 6.149 | 123.485 | 0.825 | 1.098  | 1.098  | 2.839  | -0.076 | 4.959 | 29 |
| 844  | Mn2CrPb | Mn | Cr | Pb | 121 | 0.155  | 0.396  | 6.435 | 122.623 | 0.631 | 3.399  | 3.399  | -3.244 | -0.022 | 3.532 | 24 |
| 726  | Fe2ScSn | Fe | Sc | Sn | 121 | 1.120  | -0.123 | 6.197 | 122.522 | 0.862 | 0.577  | 0.577  | -0.154 | -0.051 | 0.949 | 23 |
| 523  | Cr2ZrGe | Cr | Zr | Ge | 121 | 0.566  | -0.007 | 6.220 | 122.069 | 0.761 | 2.000  | 2.000  | -0.237 | -0.073 | 3.690 | 20 |
| 258  | Co2ZrGa | Co | Zr | Ga | 121 | 1.371  | -0.449 | 6.053 | 121.874 | 0.952 | 0.592  | 0.592  | -0.100 | -0.013 | 1.071 | 25 |
| 893  | Mn2MnAs | Mn | Mn | As | xa  | 0.000  | -0.187 | 5.703 | 121.459 | 0.906 | 2.545  | -0.328 | -0.328 | 0.045  | 1.934 | 26 |
| 1541 | Pd2WAs  | Pd | W  | As | xa  | -1.389 | 0.085  | 6.273 | 121.379 | 0.001 | 0.000  | 0.000  | 0.000  | 0.000  | 0.000 | 31 |
| 978  | Mn2RuSi | Mn | Ru | Si | xa  | -1.351 | -0.448 | 5.778 | 121.309 | 0.888 | 2.683  | -0.825 | 0.062  | 0.031  | 1.951 | 26 |
| 2533 | Ti2PtBi | Ti | Pt | Bi | 121 | 1.002  | -0.257 | 6.679 | 121.169 | 0.241 | 0.849  | 0.849  | 0.051  | 0.000  | 1.749 | 23 |
| 1711 | Rh2NbIn | Rh | Nb | In | 121 | 1.347  | -0.364 | 6.428 | 120.529 | 0.112 | 0.099  | 0.099  | 0.048  | 0.008  | 0.254 | 26 |
| 1017 | Mn2WGa  | Mn | W  | Ga | 121 | 1.071  | -0.147 | 5.899 | 120.246 | 0.780 | 0.594  | 0.594  | -0.228 | -0.021 | 0.939 | 23 |
| 2455 | Ti2HfB  | Ti | Hf | B  | xa  | -0.338 | 0.323  | 6.215 | 120.027 | 0.321 | 0.889  | 0.135  | 0.103  | -0.023 | 1.104 | 15 |
| 291  | Cr2CdGa | Cr | Cd | Ga | xa  | -0.120 | 0.328  | 6.363 | 119.721 | 0.110 | 3.228  | -3.111 | 0.032  | -0.025 | 0.124 | 17 |
| 37   | Co2CoBi | Co | Co | Bi | 121 | 0.000  | 0.571  | 6.038 | 119.647 | 0.443 | 0.840  | 0.840  | -0.729 | -0.035 | 0.916 | 32 |
| 212  | Co2VB   | Co | V  | B  | 121 | 0.518  | -0.042 | 5.405 | 119.633 | 0.902 | 0.913  | 0.913  | 0.139  | 0.028  | 1.993 | 26 |
| 563  | Fe2CoAs | Fe | Co | As | 121 | 0.308  | 0.064  | 5.693 | 119.456 | 0.523 | 1.698  | 1.698  | 1.485  | -0.044 | 4.837 | 30 |
| 1156 | Ni2MnAl | Ni | Mn | Al | 121 | 0.607  | -0.435 | 5.772 | 118.945 | 0.220 | 0.402  | 0.402  | 3.348  | -0.028 | 4.124 | 30 |
| 1978 | Ru2NbSi | Ru | Nb | Si | 121 | 1.504  | -0.394 | 6.137 | 118.648 | 0.400 | 0.244  | 0.244  | 0.037  | 0.004  | 0.529 | 25 |
| 743  | Fe2VGe  | Fe | V  | Ge | 121 | 0.416  | -0.237 | 5.718 | 118.519 | 0.893 | 0.540  | 0.540  | -0.155 | -0.021 | 0.904 | 25 |

|      |         |    |    |    |     |        |        |       |         |       |        |        |        |        |       |    |
|------|---------|----|----|----|-----|--------|--------|-------|---------|-------|--------|--------|--------|--------|-------|----|
| 2812 | V2RhPb  | V  | Rh | Pb | xa  | -0.453 | 0.188  | 6.361 | 118.351 | 0.800 | -0.816 | 1.462  | 0.092  | 0.043  | 0.781 | 23 |
| 571  | Fe2CoSi | Fe | Co | Si | l21 | 0.305  | -0.223 | 5.574 | 117.516 | 0.827 | 1.411  | 1.411  | 1.696  | -0.042 | 4.476 | 29 |
| 1916 | Ru2FeB  | Ru | Fe | B  | l21 | 1.592  | 0.172  | 5.663 | 117.509 | 0.546 | 0.122  | 0.122  | 2.442  | 0.051  | 2.737 | 27 |
| 2143 | Sc2CdSi | Sc | Cd | Si | l21 | 2.022  | -0.375 | 6.801 | 117.361 | 0.000 | 0.000  | 0.000  | 0.000  | 0.000  | 0.000 | 12 |
| 204  | Co2TiGe | Co | Ti | Ge | l21 | 1.200  | -0.489 | 5.840 | 116.875 | 1.000 | 1.035  | 1.035  | -0.053 | 0.027  | 2.044 | 26 |
| 830  | Mn2CoGa | Mn | Co | Ga | xa  | -1.504 | -0.242 | 5.751 | 116.823 | 0.842 | 2.802  | -1.715 | 0.931  | -0.033 | 1.985 | 26 |
| 219  | Co2VSi  | Co | V  | Si | l21 | 0.688  | -0.417 | 5.660 | 116.430 | 0.142 | 0.994  | 0.994  | 0.714  | 0.008  | 2.710 | 27 |
| 453  | Cr2ScAs | Cr | Sc | As | xa  | -0.147 | 0.044  | 6.318 | 116.131 | 0.287 | 3.113  | -2.316 | 0.312  | 0.059  | 1.168 | 20 |
| 873  | Mn2HfBi | Mn | Hf | Bi | l21 | 1.199  | 0.177  | 6.357 | 115.938 | 0.948 | 0.608  | 0.608  | -0.174 | -0.032 | 1.010 | 23 |
| 842  | Mn2CrGe | Mn | Cr | Ge | xa  | -0.016 | -0.130 | 5.830 | 115.774 | 0.886 | 2.895  | -1.082 | -1.811 | 0.061  | 0.063 | 24 |
| 1825 | Rh2YSn  | Rh | Y  | Sn | l21 | 1.913  | -0.763 | 6.642 | 115.463 | 0.121 | 0.000  | 0.000  | 0.000  | 0.000  | 0.000 | 25 |
| 407  | Cr2NiSn | Cr | Ni | Sn | xa  | -0.635 | 0.154  | 6.134 | 115.169 | 0.168 | 2.921  | -2.366 | 0.336  | -0.029 | 0.862 | 26 |
| 1165 | Ni2MnSi | Ni | Mn | Si | l21 | 0.240  | -0.396 | 5.681 | 114.598 | 0.382 | 0.258  | 0.258  | 3.319  | -0.032 | 3.803 | 31 |
| 351  | Cr2HfSi | Cr | Hf | Si | l21 | 0.615  | -0.098 | 6.105 | 114.502 | 0.256 | 1.871  | 1.871  | -0.015 | -0.063 | 3.664 | 20 |
| 730  | Fe2TiBi | Fe | Ti | Bi | l21 | 0.976  | 0.145  | 6.221 | 114.176 | 0.284 | 1.456  | 1.456  | -0.594 | -0.045 | 2.273 | 25 |
| 2420 | Ti2CrAl | Ti | Cr | Al | l21 | 0.197  | -0.181 | 6.214 | 114.065 | 0.004 | -0.001 | -0.001 | 0.003  | 0.000  | 0.001 | 17 |
| 1131 | Ni2FeSb | Ni | Fe | Sb | l21 | 0.039  | 0.019  | 5.998 | 113.974 | 0.614 | 0.216  | 0.216  | 2.843  | 0.012  | 3.287 | 33 |
| 658  | Fe2NbSb | Fe | Nb | Sb | l21 | 1.137  | -0.003 | 6.165 | 113.730 | 0.643 | 1.208  | 1.208  | -0.311 | -0.012 | 2.093 | 26 |
| 2366 | Sc2ZrAs | Sc | Zr | As | l21 | 0.091  | -0.202 | 6.853 | 113.717 | 0.032 | 0.079  | 0.079  | 0.464  | -0.014 | 0.608 | 15 |
| 733  | Fe2TiIn | Fe | Ti | In | l21 | 1.134  | -0.055 | 6.074 | 113.540 | 0.863 | 0.747  | 0.747  | -0.404 | -0.065 | 1.025 | 23 |
| 2696 | V2CuAs  | V  | Cu | As | l21 | 0.753  | 0.017  | 5.975 | 113.379 | 0.580 | 0.352  | 0.352  | 0.005  | 0.000  | 0.709 | 16 |
| 143  | Co2NiSn | Co | Ni | Sn | l21 | 0.023  | 0.065  | 5.922 | 113.242 | 0.643 | 1.132  | 1.132  | 0.476  | -0.086 | 2.654 | 32 |
| 2302 | Sc2ScBi | Sc | Sc | Bi | l21 | 0.000  | -0.122 | 7.268 | 113.196 | 0.218 | 0.099  | 0.099  | 0.218  | -0.013 | 0.403 | 14 |
| 692  | Fe2PtSi | Fe | Pt | Si | xa  | -0.058 | -0.121 | 5.887 | 113.043 | 0.006 | 2.572  | -1.871 | 0.057  | 0.045  | 0.803 | 30 |
| 2074 | Ru2WIn  | Ru | W  | In | l21 | 1.720  | 0.140  | 6.327 | 112.930 | 0.564 | 0.215  | 0.215  | 0.083  | -0.014 | 0.499 | 25 |
| 292  | Cr2CdGe | Cr | Cd | Ge | l21 | 0.009  | 0.423  | 6.310 | 112.283 | 0.287 | 2.704  | 2.704  | 0.009  | -0.106 | 5.311 | 18 |
| 2737 | V2IrSi  | V  | Ir | Si | xa  | -1.004 | -0.460 | 5.949 | 111.869 | 0.226 | -0.060 | 0.172  | 0.022  | 0.000  | 0.134 | 23 |
| 1884 | Ru2CoBi | Ru | Co | Bi | l21 | 0.526  | 0.488  | 6.304 | 111.760 | 0.584 | 0.519  | 0.519  | 1.884  | -0.020 | 2.902 | 30 |
| 2890 | V2ZnSb  | V  | Zn | Sb | l21 | 0.410  | 0.243  | 6.408 | 111.642 | 0.385 | 1.811  | 1.811  | 0.047  | -0.017 | 3.652 | 17 |

|      |         |    |    |    |     |        |        |       |         |       |        |        |        |        |       |    |
|------|---------|----|----|----|-----|--------|--------|-------|---------|-------|--------|--------|--------|--------|-------|----|
| 339  | Cr2FeSb | Cr | Fe | Sb | xa  | -0.291 | 0.235  | 6.027 | 111.553 | 0.977 | 2.367  | -1.685 | 0.323  | 0.002  | 1.007 | 25 |
| 1394 | Pd2FeSb | Pd | Fe | Sb | l21 | 0.001  | -0.125 | 6.399 | 111.248 | 0.723 | 0.100  | 0.100  | 3.107  | 0.019  | 3.326 | 33 |
| 573  | Fe2CrAl | Fe | Cr | Al | l21 | 0.318  | -0.153 | 5.639 | 111.203 | 0.408 | 0.200  | 0.200  | -0.172 | -0.005 | 0.223 | 25 |
| 2684 | V2CrAl  | V  | Cr | Al | l21 | 0.047  | -0.062 | 5.970 | 110.843 | 0.714 | 0.606  | 0.606  | -0.384 | 0.000  | 0.828 | 19 |
| 2566 | Ti2ScBi | Ti | Sc | Bi | xa  | -0.360 | 0.004  | 6.879 | 110.586 | 0.028 | 1.076  | 0.286  | 0.046  | -0.045 | 1.363 | 16 |
| 1092 | Ni2CoB  | Ni | Co | B  | xa  | -0.301 | 0.190  | 5.322 | 110.481 | 0.622 | 0.354  | 0.112  | 0.857  | -0.033 | 1.290 | 32 |
| 1028 | Mn2YGa  | Mn | Y  | Ga | xa  | -0.001 | 0.029  | 6.575 | 110.260 | 0.654 | 0.000  | 0.000  | 0.007  | 0.000  | 0.007 | 20 |
| 94   | Co2IrGe | Co | Ir | Ge | xa  | -0.287 | 0.055  | 5.869 | 109.982 | 0.489 | 1.603  | -0.525 | 0.243  | 0.025  | 1.346 | 31 |
| 974  | Mn2RuGe | Mn | Ru | Ge | xa  | -1.342 | -0.241 | 5.890 | 109.767 | 0.931 | 2.914  | -1.133 | 0.112  | 0.038  | 1.931 | 26 |
| 2028 | Ru2RuGa | Ru | Ru | Ga | xa  | 0.000  | 0.100  | 6.088 | 109.659 | 0.470 | 0.966  | 0.159  | 0.159  | 0.014  | 1.298 | 27 |
| 125  | Co2NbBi | Co | Nb | Bi | l21 | 0.701  | 0.341  | 6.294 | 109.514 | 0.511 | 0.317  | 0.317  | -0.031 | 0.003  | 0.606 | 28 |
| 574  | Fe2CrAs | Fe | Cr | As | xa  | -0.149 | 0.046  | 5.747 | 109.202 | 0.190 | 2.425  | 1.457  | -0.895 | 0.055  | 3.042 | 27 |
| 1977 | Ru2NbSb | Ru | Nb | Sb | l21 | 0.865  | -0.010 | 6.418 | 109.087 | 0.783 | 0.700  | 0.700  | 0.228  | 0.039  | 1.667 | 26 |
| 2717 | V2HfAl  | V  | Hf | Al | xa  | -0.280 | -0.031 | 6.393 | 108.680 | 0.359 | 1.262  | -1.429 | 0.278  | 0.000  | 0.111 | 17 |
| 906  | Mn2MoBi | Mn | Mo | Bi | xa  | -0.518 | 0.479  | 6.394 | 108.211 | 0.956 | 3.195  | -1.984 | -0.408 | 0.061  | 0.864 | 25 |
| 2124 | Sc2AuAs | Sc | Au | As | l21 | 2.385  | -0.793 | 6.794 | 108.157 | 0.377 | 0.337  | 0.337  | 0.039  | -0.003 | 0.710 | 12 |
| 673  | Fe2PdAs | Fe | Pd | As | l21 | 0.447  | 0.059  | 6.002 | 108.095 | 0.612 | 2.456  | 2.456  | 0.207  | -0.055 | 5.064 | 31 |
| 1177 | Ni2MoSn | Ni | Mo | Sn | l21 | 0.386  | 0.103  | 6.124 | 108.033 | 0.515 | 0.142  | 0.142  | 1.010  | -0.018 | 1.276 | 30 |
| 2307 | Sc2ScSb | Sc | Sc | Sb | xa  | 0.000  | -0.279 | 7.093 | 107.952 | 0.162 | 0.185  | 0.069  | 0.069  | -0.008 | 0.315 | 14 |
| 868  | Mn2FeSi | Mn | Fe | Si | xa  | -0.385 | -0.427 | 5.591 | 107.920 | 0.840 | 2.364  | -0.722 | 0.347  | 0.011  | 2.000 | 26 |
| 144  | Co2PdAl | Co | Pd | Al | xa  | -0.295 | -0.240 | 5.881 | 107.079 | 0.366 | 1.640  | 1.454  | 0.073  | -0.014 | 3.153 | 31 |
| 665  | Fe2NiGa | Fe | Ni | Ga | l21 | 0.038  | -0.029 | 5.749 | 106.936 | 0.703 | 2.198  | 2.198  | 0.589  | -0.145 | 4.840 | 29 |
| 2331 | Sc2VSn  | Sc | V  | Sn | l21 | 0.248  | -0.183 | 6.909 | 106.547 | 0.901 | 0.069  | 0.069  | 2.307  | -0.102 | 2.343 | 15 |
| 820  | Mn2CdGe | Mn | Cd | Ge | l21 | 0.298  | 0.186  | 6.358 | 106.299 | 0.525 | 3.377  | 3.377  | -0.028 | -0.076 | 6.650 | 20 |
| 968  | Mn2RhSn | Mn | Rh | Sn | xa  | -0.602 | -0.209 | 6.271 | 106.112 | 0.360 | 3.578  | -3.215 | 0.041  | 0.033  | 0.437 | 27 |
| 926  | Mn2NiAs | Mn | Ni | As | xa  | -0.330 | -0.108 | 5.864 | 105.962 | 0.001 | 3.202  | -2.430 | 0.030  | 0.040  | 0.842 | 29 |
| 2817 | V2RuAs  | V  | Ru | As | xa  | -0.516 | -0.155 | 6.004 | 105.696 | 0.016 | -0.214 | 0.588  | 0.115  | -0.002 | 0.487 | 23 |
| 1951 | Ru2MnGa | Ru | Mn | Ga | l21 | 1.631  | -0.283 | 5.981 | 105.451 | 0.396 | -0.239 | -0.239 | 2.595  | -0.006 | 2.111 | 26 |
| 2609 | Ti2YB   | Ti | Y  | B  | xa  | -0.518 | 0.507  | 6.419 | 105.441 | 0.277 | 0.000  | 0.000  | 0.005  | 0.000  | 0.005 | 14 |



|      |         |    |    |    |     |        |        |       |         |       |        |        |        |        |       |    |
|------|---------|----|----|----|-----|--------|--------|-------|---------|-------|--------|--------|--------|--------|-------|----|
| 557  | Fe2CdIn | Fe | Cd | In | l21 | 0.634  | 0.362  | 6.379 | 100.637 | 0.850 | 2.506  | 2.506  | -0.048 | -0.156 | 4.808 | 21 |
| 1390 | Pd2FeGa | Pd | Fe | Ga | l21 | 0.411  | -0.332 | 6.124 | 100.627 | 0.423 | 0.076  | 0.076  | 3.047  | -0.042 | 3.157 | 31 |
| 267  | Cr2AgB  | Cr | Ag | B  | xa  | -0.283 | 0.829  | 5.846 | 100.402 | 0.097 | 2.750  | -2.268 | 0.100  | 0.036  | 0.618 | 16 |
| 496  | Cr2YAl  | Cr | Y  | Al | xa  | -0.586 | 0.140  | 6.647 | 100.303 | 0.655 | 0.000  | 0.000  | 0.007  | 0.000  | 0.007 | 18 |
| 2481 | Ti2MnIn | Ti | Mn | In | xa  | -0.162 | -0.114 | 6.477 | 99.949  | 1.000 | -1.204 | -1.285 | 2.957  | -0.038 | 0.430 | 18 |
| 203  | Co2TiGa | Co | Ti | Ga | l21 | 1.324  | -0.520 | 5.825 | 99.862  | 0.931 | 0.602  | 0.602  | -0.142 | -0.014 | 1.048 | 25 |
| 2532 | Ti2PtB  | Ti | Pt | B  | l21 | 0.384  | -0.166 | 6.073 | 99.642  | 0.202 | 0.187  | 0.187  | 0.033  | 0.001  | 0.408 | 21 |
| 1914 | Ru2FeAl | Ru | Fe | Al | l21 | 1.024  | -0.284 | 5.959 | 99.560  | 0.669 | 0.170  | 0.170  | 2.727  | 0.009  | 3.076 | 27 |
| 2174 | Sc2CuPb | Sc | Cu | Pb | l21 | 1.657  | -0.257 | 6.924 | 99.558  | 0.047 | 0.236  | 0.236  | 0.020  | -0.021 | 0.471 | 11 |
| 2427 | Ti2CrPb | Ti | Cr | Pb | xa  | -0.224 | 0.143  | 6.569 | 99.380  | 1.000 | -1.037 | -1.387 | 2.781  | -0.030 | 0.327 | 18 |
| 900  | Mn2MnSb | Mn | Mn | Sb | xa  | 0.000  | 0.005  | 5.966 | 99.368  | 0.982 | 2.856  | -0.475 | -0.476 | 0.034  | 1.939 | 26 |
| 998  | Mn2TiPb | Mn | Ti | Pb | l21 | 0.702  | 0.115  | 6.387 | 99.234  | 0.036 | 2.864  | 2.864  | -1.134 | -0.087 | 4.507 | 22 |
| 1269 | Ni2VBi  | Ni | V  | Bi | l21 | 0.230  | 0.256  | 6.227 | 98.942  | 0.665 | -0.007 | -0.007 | 1.734  | -0.043 | 1.677 | 30 |
| 1985 | Ru2NiGe | Ru | Ni | Ge | l21 | 0.895  | -0.067 | 5.938 | 98.864  | 0.001 | 0.107  | 0.107  | 0.175  | -0.002 | 0.387 | 30 |
| 2319 | Sc2TiSi | Sc | Ti | Si | l21 | 0.301  | -0.231 | 6.691 | 98.466  | 0.089 | 0.349  | 0.349  | 1.614  | -0.047 | 2.265 | 14 |
| 1667 | Rh2HfIn | Rh | Hf | In | l21 | 2.182  | -0.774 | 6.479 | 98.401  | 0.006 | 0.090  | 0.090  | 0.005  | 0.011  | 0.196 | 25 |
| 381  | Cr2MoIn | Cr | Mo | In | l21 | 0.543  | 0.312  | 6.248 | 97.871  | 0.783 | 1.880  | 1.880  | -0.897 | -0.024 | 2.839 | 21 |
| 567  | Fe2CoGe | Fe | Co | Ge | l21 | 0.151  | 0.005  | 5.626 | 97.216  | 0.506 | 1.619  | 1.619  | 1.618  | -0.070 | 4.786 | 29 |
| 2368 | Sc2ZrBi | Sc | Zr | Bi | l21 | 0.212  | -0.104 | 7.186 | 97.094  | 0.220 | -0.006 | -0.006 | 0.028  | -0.001 | 0.015 | 15 |
| 1006 | Mn2VGa  | Mn | V  | Ga | l21 | 0.748  | -0.301 | 5.807 | 96.587  | 0.943 | 1.423  | 1.423  | -0.827 | -0.037 | 1.982 | 22 |
| 811  | Mn2AuPb | Mn | Au | Pb | l21 | 0.186  | 0.205  | 6.635 | 96.523  | 0.797 | 3.688  | 3.688  | 0.026  | -0.155 | 7.247 | 19 |
| 2591 | Ti2VIn  | Ti | V  | In | l21 | 0.247  | 0.006  | 6.519 | 96.238  | 0.517 | -0.045 | -0.045 | 1.237  | -0.054 | 1.093 | 16 |
| 697  | Fe2RhBi | Fe | Rh | Bi | l21 | 0.118  | 0.392  | 6.312 | 96.025  | 0.716 | 2.584  | 2.584  | 0.629  | -0.083 | 5.714 | 30 |
| 675  | Fe2PdBi | Fe | Pd | Bi | l21 | 0.410  | 0.314  | 6.360 | 95.558  | 0.712 | 2.600  | 2.600  | 0.187  | -0.106 | 5.281 | 31 |
| 118  | Co2MoPb | Co | Mo | Pb | l21 | 0.580  | 0.520  | 6.216 | 95.547  | 0.171 | 1.320  | 1.320  | 1.286  | -0.032 | 3.894 | 28 |
| 472  | Cr2TiSi | Cr | Ti | Si | l21 | 0.193  | -0.234 | 5.909 | 95.430  | 0.206 | 1.564  | 1.564  | -0.243 | -0.047 | 2.838 | 20 |
| 2694 | V2CrSn  | V  | Cr | Sn | xa  | -0.200 | 0.103  | 6.218 | 95.088  | 0.462 | -0.776 | 1.157  | 1.764  | 0.000  | 2.145 | 20 |
| 140  | Co2NiPb | Co | Ni | Pb | l21 | 0.028  | 0.398  | 6.026 | 95.068  | 0.618 | 1.195  | 1.195  | 0.495  | -0.085 | 2.800 | 32 |
| 2771 | V2NbSn  | V  | Nb | Sn | l21 | 0.424  | -0.007 | 6.405 | 94.919  | 0.665 | 0.605  | 0.605  | -0.161 | -0.004 | 1.045 | 19 |

|      |         |    |    |    |     |        |        |       |        |       |        |        |        |        |       |    |
|------|---------|----|----|----|-----|--------|--------|-------|--------|-------|--------|--------|--------|--------|-------|----|
| 32   | Co2CdSi | Co | Cd | Si | l21 | 1.324  | 0.090  | 5.894 | 94.890 | 0.468 | 0.307  | 0.307  | -0.016 | -0.009 | 0.589 | 24 |
| 1374 | Pd2CrSn | Pd | Cr | Sn | l21 | 0.443  | -0.270 | 6.417 | 94.857 | 0.203 | 0.069  | 0.069  | 3.475  | -0.072 | 3.541 | 30 |
| 334  | Cr2FeBi | Cr | Fe | Bi | xa  | -0.413 | 0.588  | 6.221 | 94.829 | 0.953 | 2.773  | -2.373 | 0.624  | -0.034 | 0.990 | 25 |
| 1011 | Mn2VSi  | Mn | V  | Si | l21 | 1.082  | -0.581 | 5.657 | 94.409 | 0.713 | 0.678  | 0.678  | -0.375 | -0.018 | 0.963 | 23 |
| 99   | Co2IrSn | Co | Ir | Sn | l21 | 0.079  | 0.154  | 6.088 | 94.019 | 0.574 | 1.436  | 1.436  | 0.464  | -0.064 | 3.272 | 31 |
| 197  | Co2ScSi | Co | Sc | Si | l21 | 1.546  | -0.571 | 5.857 | 93.734 | 0.994 | 0.585  | 0.585  | -0.104 | 0.007  | 1.073 | 25 |
| 588  | Fe2CuGa | Fe | Cu | Ga | l21 | 0.204  | 0.049  | 5.797 | 93.711 | 0.471 | 2.247  | 2.247  | 0.117  | -0.143 | 4.468 | 20 |
| 1989 | Ru2NiSi | Ru | Ni | Si | l21 | 1.176  | -0.282 | 5.841 | 93.613 | 0.005 | 0.057  | 0.057  | 0.108  | -0.001 | 0.221 | 30 |
| 2072 | Ru2WGa  | Ru | W  | Ga | l21 | 1.585  | -0.124 | 6.142 | 93.524 | 0.285 | 0.106  | 0.106  | 0.044  | -0.003 | 0.253 | 25 |
| 2612 | Ti2YGe  | Ti | Y  | Ge | xa  | -0.329 | -0.093 | 6.779 | 93.484 | 0.555 | 0.000  | 0.000  | 0.008  | 0.000  | 0.008 | 15 |
| 2085 | Ru2YIn  | Ru | Y  | In | l21 | 1.164  | -0.117 | 6.626 | 92.883 | 0.001 | 0.000  | 0.000  | 0.000  | 0.000  | 0.000 | 22 |
| 2723 | V2HfIn  | V  | Hf | In | xa  | -0.229 | 0.166  | 6.611 | 92.466 | 0.294 | -1.413 | 1.837  | -0.287 | 0.027  | 0.164 | 17 |
| 970  | Mn2RuAs | Mn | Ru | As | xa  | -1.160 | -0.123 | 5.882 | 91.911 | 0.994 | 2.982  | -0.290 | 0.125  | 0.049  | 2.866 | 27 |
| 502  | Cr2YIn  | Cr | Y  | In | xa  | -0.712 | 0.176  | 6.889 | 91.852 | 0.370 | 0.000  | 0.000  | 0.006  | 0.000  | 0.006 | 18 |
| 735  | Fe2TiSb | Fe | Ti | Sb | l21 | 0.852  | -0.240 | 6.032 | 91.812 | 0.939 | 0.700  | 0.700  | -0.267 | -0.016 | 1.117 | 25 |
| 2617 | Ti2YSn  | Ti | Y  | Sn | xa  | -0.202 | -0.088 | 7.014 | 91.617 | 0.478 | 0.000  | 0.000  | 0.006  | 0.000  | 0.006 | 15 |
| 486  | Cr2WAs  | Cr | W  | As | l21 | 0.372  | 0.223  | 5.948 | 91.605 | 0.008 | 0.079  | 0.079  | -0.029 | -0.002 | 0.127 | 23 |
| 308  | Cr2CoSn | Cr | Co | Sn | xa  | -1.108 | 0.175  | 6.086 | 91.418 | 0.882 | 2.594  | -2.272 | 0.776  | -0.071 | 1.027 | 25 |
| 1419 | Pd2MnAl | Pd | Mn | Al | l21 | 0.859  | -0.619 | 6.166 | 91.338 | 0.252 | 0.137  | 0.137  | 3.805  | -0.023 | 4.056 | 30 |
| 1007 | Mn2VGe  | Mn | V  | Ge | l21 | 0.728  | -0.341 | 5.757 | 90.683 | 0.891 | 0.713  | 0.713  | -0.432 | -0.020 | 0.974 | 23 |
| 2739 | V2MnAl  | V  | Mn | Al | xa  | -0.277 | -0.189 | 5.928 | 90.540 | 0.964 | -0.297 | 1.282  | 0.840  | -0.013 | 1.812 | 20 |
| 2024 | Ru2RuAl | Ru | Ru | Al | xa  | 0.000  | -0.038 | 6.073 | 90.133 | 0.515 | 0.951  | 0.175  | 0.174  | 0.010  | 1.310 | 27 |
| 2218 | Sc2MnPb | Sc | Mn | Pb | l21 | 0.463  | -0.110 | 6.978 | 90.107 | 0.766 | -0.348 | -0.348 | 3.437  | 0.022  | 2.763 | 17 |
| 1532 | Pd2VBi  | Pd | V  | Bi | l21 | 0.092  | -0.026 | 6.612 | 89.990 | 0.692 | 0.002  | 0.002  | 2.273  | -0.049 | 2.228 | 30 |
| 2325 | Sc2VGa  | Sc | V  | Ga | l21 | 0.537  | -0.184 | 6.723 | 89.556 | 0.024 | 0.158  | 0.158  | 2.309  | -0.090 | 2.535 | 14 |
| 1764 | Rh2RuGa | Rh | Ru | Ga | xa  | -0.122 | -0.068 | 6.098 | 89.326 | 0.497 | 0.217  | 0.105  | 0.327  | -0.001 | 0.648 | 29 |
| 988  | Mn2ScSb | Mn | Sc | Sb | l21 | 0.466  | -0.123 | 6.224 | 89.299 | 0.964 | 1.135  | 1.135  | -0.224 | -0.046 | 2.000 | 22 |
| 637  | Fe2MnSi | Fe | Mn | Si | l21 | 0.244  | -0.369 | 5.574 | 89.237 | 1.000 | 0.234  | 0.234  | 2.541  | -0.008 | 3.001 | 27 |
| 206  | Co2TiPb | Co | Ti | Pb | l21 | 1.221  | -0.012 | 6.179 | 89.097 | 0.996 | 1.072  | 1.072  | -0.083 | 0.001  | 2.062 | 26 |

|      |         |    |    |    |     |        |        |       |        |       |        |        |        |        |       |    |
|------|---------|----|----|----|-----|--------|--------|-------|--------|-------|--------|--------|--------|--------|-------|----|
| 2798 | V2PtGa  | V  | Pt | Ga | xa  | -0.469 | -0.298 | 6.101 | 89.064 | 0.784 | -0.523 | 1.225  | 0.070  | 0.028  | 0.800 | 23 |
| 2343 | Sc2YAl  | Sc | Y  | Al | xa  | -0.250 | -0.122 | 7.227 | 88.925 | 0.100 | 0.000  | 0.000  | 0.002  | 0.000  | 0.002 | 12 |
| 982  | Mn2ScB  | Mn | Sc | B  | xa  | -0.307 | 0.175  | 5.741 | 88.805 | 0.691 | 2.138  | -0.412 | 0.047  | 0.021  | 1.794 | 20 |
| 2009 | Ru2PtPb | Ru | Pt | Pb | l21 | 0.599  | 0.416  | 6.406 | 88.545 | 0.187 | 0.094  | 0.094  | 0.038  | -0.005 | 0.221 | 30 |
| 687  | Fe2PtGa | Fe | Pt | Ga | xa  | -0.075 | -0.101 | 5.995 | 88.482 | 0.102 | 2.570  | -2.357 | 0.092  | 0.060  | 0.365 | 29 |
| 478  | Cr2VGa  | Cr | V  | Ga | l21 | 0.175  | -0.023 | 5.932 | 88.400 | 0.001 | 1.729  | 1.729  | -0.828 | -0.023 | 2.607 | 20 |
| 2168 | Sc2CuAs | Sc | Cu | As | l21 | 2.321  | -0.572 | 6.575 | 88.196 | 0.149 | 0.123  | 0.123  | 0.009  | -0.006 | 0.249 | 12 |
| 1902 | Ru2CrSn | Ru | Cr | Sn | l21 | 1.547  | -0.035 | 6.221 | 87.731 | 0.814 | -0.196 | -0.196 | 2.357  | -0.016 | 1.949 | 26 |
| 1655 | Rh2FeGe | Rh | Fe | Ge | l21 | 0.890  | -0.269 | 6.028 | 87.085 | 0.776 | 0.237  | 0.237  | 3.029  | -0.005 | 3.498 | 30 |
| 864  | Mn2FeGe | Mn | Fe | Ge | xa  | -0.427 | -0.200 | 5.714 | 87.046 | 0.904 | 2.615  | -1.132 | 0.494  | 0.010  | 1.987 | 26 |
| 263  | Co2ZrSi | Co | Zr | Si | l21 | 1.460  | -0.529 | 5.980 | 86.905 | 1.000 | 1.047  | 1.047  | -0.068 | 0.036  | 2.062 | 26 |
| 642  | Fe2MoBi | Fe | Mo | Bi | l21 | 0.324  | 0.634  | 6.225 | 86.887 | 0.111 | 1.397  | 1.397  | -0.454 | -0.048 | 2.292 | 27 |
| 3    | Co2AgB  | Co | Ag | B  | xa  | -0.013 | 0.744  | 5.650 | 86.870 | 0.290 | 1.549  | 1.279  | -0.007 | -0.012 | 2.809 | 22 |
| 1287 | Ni2WSn  | Ni | W  | Sn | l21 | 0.597  | 0.226  | 6.123 | 86.599 | 0.196 | 0.016  | 0.016  | 0.096  | 0.000  | 0.128 | 30 |
| 2749 | V2MnSn  | V  | Mn | Sn | xa  | -0.320 | -0.019 | 6.193 | 86.480 | 0.745 | -0.874 | 1.609  | 2.059  | -0.004 | 2.790 | 21 |
| 700  | Fe2RhIn | Fe | Rh | In | xa  | -0.035 | 0.142  | 6.176 | 86.394 | 0.164 | 2.562  | -2.718 | 0.144  | 0.029  | 0.017 | 28 |
| 994  | Mn2TiBi | Mn | Ti | Bi | l21 | 0.550  | 0.134  | 6.197 | 86.310 | 0.901 | 0.691  | 0.691  | -0.344 | -0.027 | 1.011 | 23 |
| 731  | Fe2TiGa | Fe | Ti | Ga | l21 | 0.656  | -0.368 | 5.823 | 86.270 | 0.923 | 0.629  | 0.629  | -0.279 | -0.038 | 0.941 | 23 |
| 2299 | Sc2ScAl | Sc | Sc | Al | l21 | 0.000  | -0.145 | 7.035 | 85.619 | 0.386 | 0.151  | 0.151  | 0.228  | -0.006 | 0.524 | 12 |
| 1556 | Pd2YGe  | Pd | Y  | Ge | l21 | 0.481  | -0.744 | 6.622 | 85.297 | 0.000 | 0.000  | 0.000  | 0.000  | 0.000  | 0.000 | 27 |
| 2179 | Sc2FeAs | Sc | Fe | As | l21 | 1.313  | -0.488 | 6.498 | 85.207 | 0.257 | -0.317 | -0.317 | 1.896  | 0.069  | 1.331 | 19 |
| 259  | Co2ZrGe | Co | Zr | Ge | l21 | 1.305  | -0.424 | 6.064 | 85.062 | 1.000 | 1.059  | 1.059  | -0.086 | 0.035  | 2.067 | 26 |
| 916  | Mn2NbB  | Mn | Nb | B  | l21 | 0.512  | 0.105  | 5.687 | 85.044 | 0.930 | 1.148  | 1.148  | -0.296 | -0.049 | 1.951 | 22 |
| 1898 | Ru2CrIn | Ru | Cr | In | l21 | 1.065  | 0.159  | 6.213 | 84.924 | 0.888 | -0.272 | -0.272 | 1.765  | -0.037 | 1.184 | 25 |
| 1587 | Rh2AgBi | Rh | Ag | Bi | l21 | 0.816  | 0.058  | 6.525 | 84.886 | 0.558 | 0.080  | 0.080  | -0.001 | 0.006  | 0.165 | 24 |
| 344  | Cr2HfB  | Cr | Hf | B  | xa  | -0.780 | 0.341  | 5.840 | 84.479 | 0.004 | -0.002 | 0.002  | 0.000  | 0.000  | 0.000 | 19 |
| 77   | Co2FeSn | Co | Fe | Sn | l21 | 0.845  | -0.005 | 5.978 | 84.363 | 0.566 | 1.390  | 1.390  | 2.943  | -0.049 | 5.674 | 30 |
| 1392 | Pd2FeIn | Pd | Fe | In | l21 | 0.406  | -0.256 | 6.342 | 84.331 | 0.639 | 0.076  | 0.076  | 3.109  | -0.060 | 3.201 | 31 |
| 215  | Co2VGe  | Co | V  | Ge | l21 | 0.567  | -0.219 | 5.764 | 84.075 | 0.416 | 1.035  | 1.035  | 0.792  | 0.000  | 2.862 | 27 |

|      |         |    |    |    |     |        |        |       |        |       |        |        |        |        |       |    |
|------|---------|----|----|----|-----|--------|--------|-------|--------|-------|--------|--------|--------|--------|-------|----|
| 551  | Fe2CdAl | Fe | Cd | Al | l21 | 0.479  | 0.210  | 6.120 | 84.011 | 0.793 | 2.303  | 2.303  | -0.032 | -0.063 | 4.511 | 21 |
| 2323 | Sc2VB   | Sc | V  | B  | l21 | 0.816  | 0.336  | 6.335 | 83.834 | 0.349 | 0.162  | 0.162  | 2.211  | -0.067 | 2.468 | 14 |
| 2443 | Ti2FeAs | Ti | Fe | As | l21 | 0.629  | -0.354 | 6.152 | 83.717 | 0.018 | -0.071 | -0.071 | 2.046  | 0.056  | 1.960 | 21 |
| 1722 | Rh2NiIn | Rh | Ni | In | l21 | 0.452  | -0.126 | 6.194 | 83.036 | 0.847 | 0.517  | 0.517  | 0.882  | -0.037 | 1.879 | 31 |
| 2450 | Ti2FeSb | Ti | Fe | Sb | l21 | 0.196  | -0.174 | 6.406 | 82.993 | 0.315 | -0.332 | -0.332 | 2.254  | 0.043  | 1.633 | 21 |
| 1674 | Rh2IrB  | Rh | Ir | B  | xa  | -0.455 | 0.560  | 5.887 | 82.701 | 0.080 | 0.091  | 0.264  | 0.214  | -0.005 | 0.564 | 30 |
| 919  | Mn2NbGe | Mn | Nb | Ge | l21 | 0.841  | -0.242 | 5.965 | 82.448 | 0.910 | 0.614  | 0.614  | -0.230 | -0.025 | 0.973 | 23 |
| 1818 | Rh2YBi  | Rh | Y  | Bi | l21 | 1.385  | -0.509 | 6.779 | 82.290 | 0.000 | 0.000  | 0.000  | 0.000  | 0.000  | 0.000 | 26 |
| 1979 | Ru2NbSn | Ru | Nb | Sn | l21 | 1.639  | -0.198 | 6.396 | 82.077 | 0.199 | 0.242  | 0.242  | 0.042  | -0.004 | 0.522 | 25 |
| 1393 | Pd2FePb | Pd | Fe | Pb | l21 | 0.145  | 0.022  | 6.467 | 81.991 | 0.362 | 0.088  | 0.088  | 3.131  | -0.028 | 3.279 | 32 |
| 2869 | V2WSi   | V  | W  | Si | l21 | 0.170  | -0.180 | 6.027 | 81.484 | 0.100 | 0.292  | 0.292  | -0.033 | -0.006 | 0.545 | 20 |
| 2578 | Ti2TiGa | Ti | Ti | Ga | l21 | 0.000  | -0.183 | 6.411 | 81.250 | 0.150 | 0.181  | 0.181  | 1.012  | -0.038 | 1.336 | 15 |
| 2327 | Sc2VIn  | Sc | V  | In | l21 | 0.422  | -0.111 | 6.951 | 80.604 | 0.102 | 0.147  | 0.147  | 2.363  | -0.121 | 2.536 | 14 |
| 876  | Mn2HfIn | Mn | Hf | In | l21 | 1.096  | -0.045 | 6.424 | 80.315 | 0.329 | 2.538  | 2.538  | -0.514 | -0.157 | 4.405 | 21 |
| 1026 | Mn2YB   | Mn | Y  | B  | xa  | -0.494 | 0.458  | 6.132 | 80.223 | 0.956 | 0.000  | 0.000  | 0.011  | 0.000  | 0.011 | 20 |
| 575  | Fe2CrB  | Fe | Cr | B  | l21 | 0.170  | 0.073  | 5.316 | 79.753 | 0.902 | -0.032 | -0.032 | 0.986  | -0.009 | 0.913 | 25 |
| 327  | Cr2CuPb | Cr | Cu | Pb | xa  | -0.343 | 0.517  | 6.414 | 79.751 | 0.155 | 3.352  | -3.203 | 0.035  | -0.046 | 0.138 | 17 |
| 2386 | Ti2AgSn | Ti | Ag | Sn | l21 | 0.760  | -0.096 | 6.641 | 79.739 | 0.133 | 0.113  | 0.113  | 0.000  | 0.000  | 0.226 | 13 |
| 2012 | Ru2PtSn | Ru | Pt | Sn | l21 | 0.581  | 0.101  | 6.325 | 79.719 | 0.112 | 0.069  | 0.069  | 0.031  | -0.003 | 0.166 | 30 |
| 196  | Co2ScSb | Co | Sc | Sb | l21 | 1.577  | -0.397 | 6.205 | 79.479 | 1.000 | 1.093  | 1.093  | -0.123 | 0.036  | 2.099 | 26 |
| 2658 | V2AuPb  | V  | Au | Pb | l21 | 0.470  | 0.395  | 6.557 | 79.198 | 0.202 | 1.409  | 1.409  | -0.014 | -0.041 | 2.763 | 15 |
| 727  | Fe2TiAl | Fe | Ti | Al | l21 | 1.024  | -0.454 | 5.817 | 79.160 | 0.878 | 0.629  | 0.629  | -0.252 | -0.014 | 0.992 | 23 |
| 2753 | V2MoBi  | V  | Mo | Bi | l21 | 0.003  | 0.435  | 6.457 | 79.145 | 0.004 | 1.443  | 1.443  | -0.747 | 0.003  | 2.142 | 21 |
| 1090 | Ni2CoAl | Ni | Co | Al | xa  | -0.060 | -0.271 | 5.655 | 79.133 | 0.691 | 0.393  | 0.164  | 1.093  | -0.020 | 1.630 | 32 |
| 644  | Fe2MoGe | Fe | Mo | Ge | xa  | -0.002 | 0.038  | 5.942 | 79.033 | 0.081 | 2.209  | 1.730  | -0.480 | 0.007  | 3.466 | 26 |
| 789  | Fe2ZrPb | Fe | Zr | Pb | l21 | 1.161  | 0.148  | 6.422 | 78.956 | 0.615 | 1.870  | 1.870  | -0.438 | -0.070 | 3.232 | 24 |
| 725  | Fe2ScSi | Fe | Sc | Si | l21 | 0.641  | -0.378 | 5.840 | 78.902 | 0.895 | 0.535  | 0.535  | -0.092 | -0.020 | 0.958 | 23 |
| 1501 | Pd2RuGe | Pd | Ru | Ge | xa  | -0.877 | -0.089 | 6.177 | 78.876 | 0.012 | 0.010  | 0.006  | 0.041  | -0.002 | 0.055 | 32 |
| 1240 | Ni2RuPb | Ni | Ru | Pb | xa  | -0.165 | 0.380  | 6.170 | 78.756 | 0.806 | 0.492  | 0.126  | 0.385  | -0.015 | 0.988 | 32 |



|      |         |    |    |    |     |        |        |       |        |       |        |        |        |        |       |    |
|------|---------|----|----|----|-----|--------|--------|-------|--------|-------|--------|--------|--------|--------|-------|----|
| 1133 | Ni2FeSn | Ni | Fe | Sn | l21 | 0.229  | -0.054 | 5.991 | 78.654 | 0.513 | 0.210  | 0.210  | 2.882  | -0.038 | 3.264 | 32 |
| 788  | Fe2ZrIn | Fe | Zr | In | l21 | 1.283  | -0.029 | 6.362 | 78.353 | 0.629 | 1.997  | 1.997  | -0.451 | -0.118 | 3.425 | 23 |
| 1236 | Ni2RuBi | Ni | Ru | Bi | xa  | -0.379 | 0.360  | 6.201 | 77.945 | 0.005 | 0.001  | 0.000  | 0.001  | 0.000  | 0.002 | 33 |
| 2577 | Ti2TiBi | Ti | Ti | Bi | xa  | 0.000  | 0.062  | 6.682 | 77.868 | 0.576 | 0.322  | 0.119  | 0.109  | -0.017 | 0.533 | 17 |
| 2794 | V2PtAl  | V  | Pt | Al | xa  | -0.903 | -0.407 | 6.088 | 77.575 | 0.863 | -0.545 | 1.259  | 0.080  | 0.006  | 0.800 | 23 |
| 428  | Cr2PtSi | Cr | Pt | Si | xa  | -0.831 | -0.199 | 5.935 | 77.568 | 1.000 | 2.616  | -0.971 | 0.242  | 0.010  | 1.897 | 26 |
| 98   | Co2IrSi | Co | Ir | Si | xa  | -0.600 | -0.165 | 5.781 | 77.399 | 0.068 | 1.556  | -0.582 | 0.231  | 0.021  | 1.226 | 31 |
| 2616 | Ti2YSi  | Ti | Y  | Si | xa  | -0.262 | -0.079 | 6.704 | 76.669 | 0.470 | 0.000  | 0.000  | 0.008  | 0.000  | 0.008 | 15 |
| 205  | Co2TiIn | Co | Ti | In | l21 | 1.388  | -0.253 | 6.071 | 76.511 | 0.872 | 0.664  | 0.664  | -0.202 | -0.039 | 1.087 | 25 |
| 2664 | V2CdB   | V  | Cd | B  | l21 | 0.577  | 0.738  | 5.956 | 76.454 | 0.021 | 0.001  | 0.001  | 0.000  | 0.000  | 0.002 | 15 |
| 1293 | Ni2YGe  | Ni | Y  | Ge | l21 | 0.826  | -0.418 | 6.259 | 76.384 | 0.002 | 0.000  | 0.000  | 0.000  | 0.000  | 0.000 | 27 |
| 2318 | Sc2TiSb | Sc | Ti | Sb | l21 | 0.264  | -0.267 | 6.954 | 76.224 | 0.493 | 0.227  | 0.227  | 1.449  | -0.039 | 1.864 | 15 |
| 1725 | Rh2NiSi | Rh | Ni | Si | l21 | 1.158  | -0.458 | 5.864 | 76.072 | 0.793 | 0.255  | 0.255  | 0.553  | -0.008 | 1.055 | 32 |
| 233  | Co2YAs  | Co | Y  | As | l21 | 1.143  | -0.205 | 6.215 | 75.733 | 0.889 | 0.000  | 0.000  | 0.006  | 0.000  | 0.006 | 26 |
| 2371 | Sc2ZrIn | Sc | Zr | In | l21 | 0.105  | -0.135 | 7.180 | 75.720 | 0.093 | 0.361  | 0.361  | 0.985  | -0.032 | 1.675 | 13 |
| 1032 | Mn2YSb  | Mn | Y  | Sb | l21 | 0.917  | -0.053 | 6.660 | 75.671 | 0.680 | 0.000  | 0.000  | 0.006  | 0.000  | 0.006 | 22 |
| 2816 | V2RuAl  | V  | Ru | Al | xa  | -0.894 | -0.334 | 6.050 | 75.401 | 0.047 | -0.058 | 1.842  | 0.254  | -0.006 | 2.032 | 21 |
| 1863 | Ru2AuGa | Ru | Au | Ga | l21 | 0.365  | 0.171  | 6.203 | 75.322 | 0.038 | 0.048  | 0.048  | 0.011  | -0.002 | 0.105 | 20 |
| 53   | Co2CrSb | Co | Cr | Sb | l21 | 0.834  | 0.068  | 5.995 | 75.193 | 1.000 | 1.068  | 1.068  | 2.804  | -0.021 | 4.919 | 29 |
| 2825 | V2RuSi  | V  | Ru | Si | xa  | -1.001 | -0.422 | 5.929 | 74.970 | 0.375 | -0.191 | 0.818  | 0.132  | -0.006 | 0.753 | 22 |
| 2157 | Sc2CrAs | Sc | Cr | As | l21 | 0.471  | -0.190 | 6.491 | 74.958 | 0.404 | -0.236 | -0.236 | 3.035  | 0.030  | 2.593 | 17 |
| 969  | Mn2RuAl | Mn | Ru | Al | xa  | -1.090 | -0.317 | 5.850 | 74.517 | 0.968 | 2.847  | -1.887 | 0.011  | 0.021  | 0.992 | 25 |
| 2155 | Sc2CoSn | Sc | Co | Sn | l21 | 0.726  | -0.383 | 6.749 | 74.401 | 0.157 | -0.142 | -0.142 | 1.340  | 0.096  | 1.152 | 19 |
| 309  | Cr2CrAl | Cr | Cr | Al | xa  | 0.000  | -0.024 | 5.903 | 74.316 | 0.635 | -1.566 | 2.144  | 2.144  | -0.014 | 2.708 | 21 |
| 1604 | Rh2AuSi | Rh | Au | Si | l21 | 0.975  | -0.195 | 6.158 | 74.157 | 0.001 | 0.000  | 0.000  | 0.000  | 0.000  | 0.000 | 23 |
| 1359 | Pd2CoIn | Pd | Co | In | l21 | 0.192  | -0.170 | 6.291 | 74.083 | 0.780 | 0.032  | 0.032  | 1.816  | -0.042 | 1.838 | 32 |
| 2188 | Sc2FeSn | Sc | Fe | Sn | l21 | 0.467  | -0.310 | 6.781 | 73.864 | 0.667 | -0.264 | -0.264 | 2.146  | 0.061  | 1.679 | 18 |
| 299  | Cr2CoAs | Cr | Co | As | xa  | -0.382 | 0.048  | 5.774 | 73.698 | 0.891 | 2.157  | -1.081 | 0.898  | 0.016  | 1.990 | 26 |
| 2451 | Ti2FeSi | Ti | Fe | Si | l21 | 0.235  | -0.422 | 6.093 | 73.565 | 0.376 | -0.059 | -0.059 | 1.948  | 0.052  | 1.882 | 20 |

|      |         |    |    |    |     |        |        |       |        |       |        |        |        |        |       |    |
|------|---------|----|----|----|-----|--------|--------|-------|--------|-------|--------|--------|--------|--------|-------|----|
| 505  | Cr2YSi  | Cr | Y  | Si | xa  | -0.291 | 0.134  | 6.554 | 73.377 | 0.966 | 0.000  | 0.000  | 0.012  | 0.000  | 0.012 | 19 |
| 1015 | Mn2WB   | Mn | W  | B  | l21 | 0.466  | 0.163  | 5.613 | 73.009 | 0.823 | 0.539  | 0.539  | -0.159 | -0.023 | 0.896 | 23 |
| 2526 | Ti2PdPb | Ti | Pd | Pb | l21 | 0.298  | -0.133 | 6.659 | 72.890 | 0.255 | 0.772  | 0.772  | 0.088  | -0.023 | 1.609 | 22 |
| 952  | Mn2PtGe | Mn | Pt | Ge | xa  | -0.350 | -0.236 | 6.132 | 72.210 | 0.149 | 3.458  | -3.247 | 0.075  | 0.035  | 0.321 | 28 |
| 2847 | V2TiSi  | V  | Ti | Si | xa  | -0.438 | -0.347 | 6.041 | 72.037 | 0.056 | -0.292 | 0.727  | -0.349 | -0.001 | 0.085 | 18 |
| 1123 | Ni2FeAl | Ni | Fe | Al | l21 | 0.205  | -0.321 | 5.725 | 71.505 | 0.579 | 0.287  | 0.287  | 2.783  | -0.017 | 3.340 | 31 |
| 88   | Co2HfSn | Co | Hf | Sn | l21 | 2.040  | -0.379 | 6.243 | 71.486 | 1.000 | 1.066  | 1.066  | -0.093 | 0.021  | 2.060 | 26 |
| 757  | Fe2WSb  | Fe | W  | Sb | l21 | 0.780  | 0.324  | 6.098 | 71.188 | 0.758 | 1.387  | 1.387  | 0.041  | -0.007 | 2.808 | 27 |
| 955  | Mn2PtSb | Mn | Pt | Sb | xa  | -0.189 | -0.099 | 6.393 | 70.881 | 0.116 | 3.650  | -3.214 | 0.061  | 0.045  | 0.542 | 29 |
| 800  | Mn2AgPb | Mn | Ag | Pb | l21 | 0.015  | 0.332  | 6.631 | 70.725 | 0.815 | 3.672  | 3.672  | 0.038  | -0.148 | 7.234 | 19 |
| 1956 | Ru2MnSi | Ru | Mn | Si | l21 | 1.881  | -0.480 | 5.902 | 70.526 | 0.960 | -0.002 | -0.002 | 2.928  | 0.017  | 2.941 | 27 |
| 1429 | Pd2MnSn | Pd | Mn | Sn | l21 | 0.577  | -0.440 | 6.407 | 70.286 | 0.240 | 0.087  | 0.087  | 3.920  | -0.067 | 4.027 | 31 |
| 2062 | Ru2VGe  | Ru | V  | Ge | l21 | 1.648  | -0.339 | 6.024 | 70.227 | 0.997 | -0.061 | -0.061 | 1.010  | 0.004  | 0.892 | 25 |
| 1158 | Ni2MnB  | Ni | Mn | B  | xa  | -0.021 | 0.105  | 5.373 | 70.075 | 0.009 | 0.288  | 0.144  | 2.175  | -0.062 | 2.545 | 30 |
| 234  | Co2YB   | Co | Y  | B  | l21 | 0.580  | 0.360  | 5.855 | 70.001 | 0.001 | 0.000  | 0.000  | 0.000  | 0.000  | 0.000 | 24 |
| 264  | Co2ZrSn | Co | Zr | Sn | l21 | 1.856  | -0.381 | 6.280 | 69.987 | 1.000 | 1.082  | 1.082  | -0.088 | 0.010  | 2.086 | 26 |
| 1691 | Rh2MnSb | Rh | Mn | Sb | l21 | 1.061  | -0.327 | 6.297 | 69.491 | 0.665 | 0.408  | 0.408  | 3.816  | 0.020  | 4.652 | 30 |
| 1896 | Ru2CrGa | Ru | Cr | Ga | l21 | 1.435  | -0.185 | 5.984 | 69.482 | 0.834 | -0.172 | -0.172 | 1.453  | -0.014 | 1.095 | 25 |
| 1091 | Ni2CoAs | Ni | Co | As | xa  | -0.337 | -0.026 | 5.682 | 69.466 | 0.180 | 0.040  | 0.040  | 0.686  | -0.004 | 0.762 | 34 |
| 2695 | V2CuAl  | V  | Cu | Al | xa  | -0.047 | 0.104  | 6.022 | 69.325 | 0.292 | 1.138  | -0.872 | 0.063  | -0.011 | 0.318 | 14 |
| 2402 | Ti2CdGa | Ti | Cd | Ga | l21 | 0.912  | -0.112 | 6.522 | 69.298 | 0.138 | 0.098  | 0.098  | -0.001 | -0.001 | 0.194 | 13 |
| 621  | Fe2IrGa | Fe | Ir | Ga | xa  | -0.191 | -0.068 | 5.944 | 69.161 | 0.408 | -2.327 | 2.545  | -0.138 | -0.054 | 0.026 | 28 |
| 855  | Mn2CuPb | Mn | Cu | Pb | xa  | -0.210 | 0.303  | 6.362 | 69.039 | 0.363 | 3.570  | -3.218 | 0.021  | 0.016  | 0.389 | 19 |
| 1014 | Mn2WAs  | Mn | W  | As | xa  | -0.154 | 0.123  | 5.990 | 69.039 | 0.783 | 2.543  | -1.218 | -0.392 | 0.066  | 0.999 | 25 |
| 633  | Fe2MnGe | Fe | Mn | Ge | l21 | 0.267  | -0.138 | 5.685 | 68.858 | 0.959 | 0.171  | 0.171  | 2.659  | -0.017 | 2.984 | 27 |
| 191  | Co2ScBi | Co | Sc | Bi | l21 | 1.343  | -0.103 | 6.357 | 68.810 | 0.943 | 1.115  | 1.115  | -0.151 | 0.028  | 2.107 | 26 |
| 2640 | V2AgAl  | V  | Ag | Al | xa  | -0.283 | 0.227  | 6.247 | 68.801 | 0.592 | 1.443  | -1.419 | 0.049  | -0.012 | 0.061 | 14 |
| 7    | Co2AgIn | Co | Ag | In | l21 | 0.420  | 0.313  | 6.180 | 68.069 | 0.738 | 1.265  | 1.265  | 0.034  | -0.129 | 2.435 | 22 |
| 954  | Mn2PtPb | Mn | Pt | Pb | xa  | -0.072 | 0.062  | 6.502 | 68.056 | 0.001 | 3.701  | -3.614 | 0.024  | 0.001  | 0.112 | 28 |

|      |         |    |    |    |     |        |        |       |        |       |        |        |        |        |       |    |
|------|---------|----|----|----|-----|--------|--------|-------|--------|-------|--------|--------|--------|--------|-------|----|
| 2576 | Ti2TiB  | Ti | Ti | B  | xa  | 0.000  | 0.199  | 6.019 | 67.918 | 0.166 | 0.836  | 0.129  | 0.129  | -0.024 | 1.070 | 15 |
| 2430 | Ti2CrSn | Ti | Cr | Sn | xa  | -0.153 | -0.125 | 6.478 | 67.626 | 1.000 | -0.973 | -1.334 | 2.638  | -0.034 | 0.297 | 18 |
| 2474 | Ti2IrSn | Ti | Ir | Sn | xa  | -0.440 | -0.428 | 6.466 | 67.374 | 0.485 | 0.695  | 1.568  | 0.107  | 0.036  | 2.406 | 21 |
| 527  | Cr2ZrSi | Cr | Zr | Si | l2l | 0.601  | -0.097 | 6.130 | 67.357 | 0.106 | 1.873  | 1.873  | -0.175 | -0.065 | 3.506 | 20 |
| 272  | Cr2AgPb | Cr | Ag | Pb | xa  | -0.196 | 0.527  | 6.685 | 67.266 | 0.015 | 3.612  | -3.492 | 0.036  | -0.040 | 0.116 | 17 |
| 1957 | Ru2MnSn | Ru | Mn | Sn | l2l | 1.781  | -0.122 | 6.221 | 67.164 | 0.864 | -0.069 | -0.069 | 3.170  | -0.010 | 3.022 | 27 |
| 518  | Cr2ZrAl | Cr | Zr | Al | l2l | 0.197  | 0.062  | 6.315 | 67.132 | 0.548 | 2.315  | 2.315  | -0.128 | -0.049 | 4.453 | 19 |
| 686  | Fe2PtBi | Fe | Pt | Bi | l2l | 0.607  | 0.296  | 6.359 | 67.099 | 0.754 | 2.525  | 2.525  | 0.224  | -0.124 | 5.150 | 31 |
| 661  | Fe2NiAl | Fe | Ni | Al | xa  | -0.048 | -0.109 | 5.711 | 67.002 | 0.220 | 2.249  | -1.520 | -0.005 | 0.017  | 0.741 | 29 |
| 513  | Cr2ZnIn | Cr | Zn | In | xa  | -0.214 | 0.304  | 6.368 | 66.966 | 0.049 | -3.131 | 3.124  | -0.025 | 0.080  | 0.048 | 17 |
| 2712 | V2FeIn  | V  | Fe | In | xa  | -0.481 | 0.156  | 6.170 | 66.893 | 0.232 | -0.548 | 1.743  | 1.551  | -0.001 | 2.745 | 21 |
| 2655 | V2AuGa  | V  | Au | Ga | l2l | 0.004  | 0.077  | 6.286 | 66.060 | 0.464 | 1.586  | 1.586  | 0.027  | -0.049 | 3.150 | 14 |
| 207  | Co2TiSb | Co | Ti | Sb | l2l | 1.156  | -0.276 | 6.065 | 65.920 | 0.802 | 0.774  | 0.774  | 0.013  | 0.021  | 1.582 | 27 |
| 1815 | Rh2YAl  | Rh | Y  | Al | l2l | 2.166  | -0.869 | 6.448 | 65.831 | 0.000 | 0.000  | 0.000  | 0.000  | 0.000  | 0.000 | 24 |
| 2555 | Ti2RuBi | Ti | Ru | Bi | xa  | -0.271 | -0.025 | 6.562 | 65.819 | 0.201 | 0.606  | 1.516  | 0.167  | 0.021  | 2.310 | 21 |
| 2650 | V2AgSn  | V  | Ag | Sn | l2l | 0.051  | 0.341  | 6.460 | 65.759 | 0.317 | 1.303  | 1.303  | -0.012 | -0.039 | 2.555 | 15 |
| 28   | Co2CdGe | Co | Cd | Ge | l2l | 1.217  | 0.188  | 6.002 | 65.425 | 0.354 | 0.425  | 0.425  | -0.021 | -0.020 | 0.809 | 24 |
| 1    | Co2AgAl | Co | Ag | Al | xa  | -0.068 | 0.083  | 5.961 | 65.388 | 0.742 | 1.568  | 1.336  | -0.007 | -0.015 | 2.882 | 22 |
| 422  | Cr2PtBi | Cr | Pt | Bi | xa  | -0.081 | 0.307  | 6.621 | 65.372 | 0.051 | 3.532  | -3.453 | -0.020 | -0.026 | 0.033 | 27 |
| 2899 | V2ZrIn  | V  | Zr | In | xa  | -0.236 | 0.134  | 6.647 | 65.007 | 0.350 | -1.511 | 1.908  | -0.278 | 0.031  | 0.150 | 17 |
| 126  | Co2NbGa | Co | Nb | Ga | l2l | 1.173  | -0.310 | 5.964 | 64.809 | 1.000 | 1.031  | 1.031  | -0.031 | 0.002  | 2.033 | 26 |
| 960  | Mn2RhB  | Mn | Rh | B  | xa  | -1.624 | -0.026 | 5.568 | 64.556 | 0.943 | 2.732  | -1.018 | 0.199  | 0.044  | 1.957 | 26 |
| 1016 | Mn2WBi  | Mn | W  | Bi | l2l | 0.027  | 0.668  | 6.351 | 64.392 | 0.367 | 2.371  | 2.371  | -0.697 | -0.042 | 4.003 | 25 |
| 1804 | Rh2WAl  | Rh | W  | Al | l2l | 0.667  | -0.254 | 6.176 | 64.389 | 0.002 | 0.000  | 0.000  | 0.000  | 0.000  | 0.000 | 27 |
| 2556 | Ti2RuGa | Ti | Ru | Ga | l2l | 0.054  | -0.444 | 6.251 | 64.338 | 0.001 | 0.001  | 0.001  | -0.001 | 0.000  | 0.001 | 19 |
| 1816 | Rh2YAs  | Rh | Y  | As | l2l | 0.817  | -0.546 | 6.492 | 64.335 | 0.452 | 0.000  | 0.000  | 0.000  | 0.000  | 0.000 | 26 |
| 1132 | Ni2FeSi | Ni | Fe | Si | xa  | -0.072 | -0.300 | 5.596 | 64.330 | 0.339 | 0.478  | 0.213  | 2.002  | -0.037 | 2.656 | 32 |
| 1598 | Rh2AuBi | Rh | Au | Bi | l2l | 0.785  | 0.042  | 6.552 | 64.302 | 0.532 | 0.115  | 0.115  | -0.003 | 0.008  | 0.235 | 24 |
| 2818 | V2RuB   | V  | Ru | B  | xa  | -0.733 | 0.011  | 5.716 | 64.243 | 0.394 | -0.028 | 1.375  | 0.185  | -0.025 | 1.507 | 21 |

|      |         |    |    |    |     |        |        |       |        |       |        |        |        |        |       |    |
|------|---------|----|----|----|-----|--------|--------|-------|--------|-------|--------|--------|--------|--------|-------|----|
| 1823 | Rh2YSb  | Rh | Y  | Sb | l21 | 1.591  | -0.694 | 6.651 | 64.193 | 0.000 | 0.000  | 0.000  | 0.000  | 0.000  | 0.000 | 26 |
| 2150 | Sc2CoGe | Sc | Co | Ge | l21 | 1.094  | -0.515 | 6.488 | 64.135 | 0.279 | -0.132 | -0.132 | 1.073  | 0.075  | 0.884 | 19 |
| 1856 | Ru2AgSb | Ru | Ag | Sb | l21 | 1.001  | 0.256  | 6.359 | 64.071 | 0.050 | 0.063  | 0.063  | 0.013  | -0.003 | 0.136 | 22 |
| 2663 | V2CdAs  | V  | Cd | As | l21 | 0.786  | 0.324  | 6.312 | 63.816 | 0.018 | 0.787  | 0.787  | 0.031  | -0.019 | 1.586 | 17 |
| 270  | Cr2AgGe | Cr | Ag | Ge | xa  | -0.062 | 0.348  | 6.273 | 63.616 | 0.126 | 3.269  | -2.998 | 0.053  | 0.016  | 0.340 | 17 |
| 2829 | V2ScB   | V  | Sc | B  | xa  | -1.027 | 0.296  | 5.937 | 63.608 | 0.196 | 0.443  | -0.235 | 0.036  | 0.003  | 0.247 | 16 |
| 87   | Co2HfSi | Co | Hf | Si | l21 | 1.627  | -0.561 | 5.943 | 63.581 | 0.438 | 1.031  | 1.031  | -0.077 | 0.042  | 2.027 | 26 |
| 1498 | Pd2RuB  | Pd | Ru | B  | xa  | -0.964 | 0.543  | 5.915 | 63.384 | 0.191 | 0.144  | 0.132  | 0.562  | -0.015 | 0.823 | 31 |
| 786  | Fe2ZrGa | Fe | Zr | Ga | l21 | 1.192  | -0.246 | 6.041 | 63.376 | 0.952 | 0.557  | 0.557  | -0.133 | -0.038 | 0.943 | 23 |
| 929  | Mn2NiGa | Mn | Ni | Ga | xa  | -0.426 | -0.240 | 5.817 | 63.262 | 0.601 | 3.108  | -2.296 | 0.323  | 0.006  | 1.141 | 27 |
| 2699 | V2CuGa  | V  | Cu | Ga | l21 | 0.271  | 0.076  | 5.992 | 63.219 | 0.012 | 0.042  | 0.042  | -0.001 | -0.001 | 0.082 | 14 |
| 526  | Cr2ZrSb | Cr | Zr | Sb | l21 | 1.024  | 0.023  | 6.377 | 63.210 | 1.000 | 1.631  | 1.631  | -0.313 | -0.051 | 2.898 | 21 |
| 2840 | V2TiB   | V  | Ti | B  | xa  | -0.635 | 0.068  | 5.773 | 63.163 | 0.005 | -0.001 | 0.003  | -0.001 | 0.000  | 0.001 | 17 |
| 828  | Mn2CoB  | Mn | Co | B  | xa  | -0.661 | -0.047 | 5.352 | 62.449 | 0.754 | 2.272  | -0.900 | 0.664  | 0.004  | 2.040 | 26 |
| 457  | Cr2ScGe | Cr | Sc | Ge | xa  | -0.328 | -0.023 | 6.326 | 62.228 | 0.995 | 3.134  | -2.688 | 0.331  | 0.051  | 0.828 | 19 |
| 973  | Mn2RuGa | Mn | Ru | Ga | xa  | -1.252 | -0.237 | 5.942 | 61.949 | 0.964 | 3.102  | -2.229 | 0.061  | 0.043  | 0.977 | 25 |
| 630  | Fe2MnB  | Fe | Mn | B  | l21 | 0.115  | 0.015  | 5.317 | 61.444 | 0.655 | -0.083 | -0.083 | 2.157  | 0.009  | 2.000 | 26 |
| 780  | Fe2ZnSi | Fe | Zn | Si | l21 | 0.520  | -0.134 | 5.638 | 60.900 | 0.639 | 0.690  | 0.690  | -0.008 | -0.042 | 1.330 | 22 |
| 2310 | Sc2TiAl | Sc | Ti | Al | l21 | 0.291  | -0.146 | 6.876 | 60.864 | 0.339 | 0.307  | 0.307  | 1.503  | -0.027 | 2.090 | 13 |
| 1879 | Ru2CdSi | Ru | Cd | Si | l21 | 1.431  | 0.086  | 6.156 | 60.821 | 0.093 | 0.175  | 0.175  | 0.005  | -0.009 | 0.346 | 22 |
| 2902 | V2ZrSi  | V  | Zr | Si | l21 | 0.005  | -0.162 | 6.191 | 60.757 | 0.001 | 0.000  | 0.000  | 0.000  | 0.000  | 0.000 | 18 |
| 84   | Co2HfIn | Co | Hf | In | l21 | 1.900  | -0.290 | 6.237 | 60.735 | 0.834 | 0.627  | 0.627  | -0.131 | -0.034 | 1.089 | 25 |
| 2479 | Ti2MnGa | Ti | Mn | Ga | l21 | 0.269  | -0.359 | 6.139 | 60.702 | 0.154 | -0.106 | -0.106 | 0.346  | -0.008 | 0.126 | 18 |
| 651  | Fe2NbAs | Fe | Nb | As | l21 | 0.127  | -0.024 | 5.957 | 60.619 | 0.842 | 1.146  | 1.146  | -0.294 | 0.018  | 2.016 | 26 |
| 2126 | Sc2AuBi | Sc | Au | Bi | l21 | 1.822  | -0.550 | 7.109 | 60.544 | 0.176 | 0.292  | 0.292  | 0.020  | -0.009 | 0.595 | 12 |
| 1108 | Ni2CrPb | Ni | Cr | Pb | l21 | 0.429  | 0.272  | 6.158 | 60.488 | 0.306 | 0.143  | 0.143  | 3.157  | -0.076 | 3.367 | 30 |
| 2633 | Ti2ZrGa | Ti | Zr | Ga | xa  | -0.083 | -0.157 | 6.616 | 60.462 | 0.072 | 1.163  | 0.304  | 0.128  | -0.039 | 1.556 | 15 |
| 2199 | Sc2HfSn | Sc | Hf | Sn | l21 | 0.064  | -0.162 | 7.082 | 60.455 | 0.110 | 0.333  | 0.333  | 0.831  | -0.051 | 1.446 | 14 |
| 329  | Cr2CuSi | Cr | Cu | Si | xa  | -0.295 | 0.042  | 5.761 | 60.448 | 0.448 | 1.949  | -1.279 | 0.091  | -0.006 | 0.755 | 17 |

|      |         |    |    |    |     |        |        |       |        |       |        |        |        |        |       |    |
|------|---------|----|----|----|-----|--------|--------|-------|--------|-------|--------|--------|--------|--------|-------|----|
| 1886 | Ru2CoGe | Ru | Co | Ge | l21 | 0.797  | -0.014 | 5.943 | 60.429 | 0.267 | 0.273  | 0.273  | 1.452  | 0.003  | 2.001 | 29 |
| 2631 | Ti2ZrB  | Ti | Zr | B  | xa  | -0.254 | 0.297  | 6.243 | 60.409 | 0.226 | 0.918  | 0.149  | 0.056  | -0.022 | 1.101 | 15 |
| 2788 | V2PdGe  | V  | Pd | Ge | l21 | 0.046  | -0.088 | 6.132 | 59.916 | 0.462 | 0.550  | 0.550  | 0.016  | -0.023 | 1.093 | 24 |
| 393  | Cr2NbPb | Cr | Nb | Pb | l21 | 0.808  | 0.420  | 6.397 | 59.721 | 0.918 | 1.810  | 1.810  | -0.687 | -0.051 | 2.882 | 21 |
| 2324 | Sc2VBi  | Sc | V  | Bi | l21 | 0.201  | 0.011  | 7.037 | 59.159 | 0.315 | -0.107 | -0.107 | 2.325  | -0.063 | 2.048 | 16 |
| 1642 | Rh2CuBi | Rh | Cu | Bi | l21 | 0.755  | 0.014  | 6.358 | 59.062 | 0.408 | 0.043  | 0.043  | -0.002 | 0.003  | 0.087 | 24 |
| 2770 | V2NbSi  | V  | Nb | Si | l21 | 0.277  | -0.253 | 6.097 | 59.050 | 0.322 | 0.205  | 0.205  | -0.034 | -0.006 | 0.370 | 19 |
| 2240 | Sc2NbPb | Sc | Nb | Pb | l21 | 0.434  | 0.002  | 7.021 | 58.450 | 0.086 | 0.008  | 0.008  | 0.239  | -0.011 | 0.244 | 15 |
| 499  | Cr2YBi  | Cr | Y  | Bi | xa  | -0.536 | 0.337  | 7.124 | 58.385 | 0.598 | 0.000  | 0.000  | 0.006  | 0.000  | 0.006 | 20 |
| 2433 | Ti2CuB  | Ti | Cu | B  | l21 | 1.980  | -0.062 | 5.857 | 58.315 | 0.002 | 0.000  | 0.000  | 0.000  | 0.000  | 0.000 | 12 |
| 2138 | Sc2CdGa | Sc | Cd | Ga | l21 | 1.735  | -0.439 | 6.897 | 58.303 | 0.005 | 0.001  | 0.001  | 0.000  | 0.000  | 0.002 | 11 |
| 448  | Cr2RuPb | Cr | Ru | Pb | xa  | -0.860 | 0.461  | 6.344 | 57.992 | 0.958 | 2.901  | -2.779 | -0.078 | -0.007 | 0.037 | 24 |
| 2584 | Ti2TiSn | Ti | Ti | Sn | l21 | 0.000  | -0.184 | 6.606 | 57.897 | 0.110 | 0.201  | 0.201  | 0.957  | -0.048 | 1.311 | 16 |
| 67   | Co2FeAl | Co | Fe | Al | xa  | -0.604 | -0.181 | 5.682 | 57.832 | 0.669 | 1.748  | 1.041  | 1.964  | -0.033 | 4.720 | 29 |
| 480  | Cr2VIn  | Cr | V  | In | l21 | 0.321  | 0.263  | 6.248 | 57.693 | 0.532 | 2.495  | 2.495  | -1.446 | -0.010 | 3.534 | 20 |
| 64   | Co2CuSb | Co | Cu | Sb | l21 | 0.704  | 0.070  | 5.925 | 57.489 | 0.199 | 0.465  | 0.465  | -0.028 | -0.016 | 0.886 | 24 |
| 2646 | V2AgIn  | V  | Ag | In | xa  | -0.331 | 0.368  | 6.495 | 57.462 | 0.082 | 1.831  | -1.778 | 0.048  | -0.067 | 0.034 | 14 |
| 1860 | Ru2AuAs | Ru | Au | As | l21 | 0.926  | 0.301  | 6.236 | 57.404 | 0.003 | 0.003  | 0.003  | 0.001  | 0.000  | 0.007 | 22 |
| 749  | Fe2WAl  | Fe | W  | Al | l21 | 1.028  | -0.209 | 5.846 | 57.022 | 0.884 | 0.538  | 0.538  | -0.104 | -0.009 | 0.963 | 25 |
| 1223 | Ni2RhAs | Ni | Rh | As | xa  | -0.418 | -0.084 | 5.867 | 56.892 | 0.000 | 0.000  | 0.001  | 0.000  | 0.000  | 0.001 | 34 |
| 2231 | Sc2MoSi | Sc | Mo | Si | l21 | 0.457  | -0.224 | 6.561 | 56.749 | 0.001 | 0.000  | 0.000  | 0.001  | 0.000  | 0.001 | 16 |
| 330  | Cr2CuSn | Cr | Cu | Sn | xa  | -0.363 | 0.265  | 6.249 | 56.739 | 0.125 | 3.063  | -2.863 | 0.046  | -0.046 | 0.200 | 17 |
| 1098 | Ni2CoSb | Ni | Co | Sb | xa  | -0.226 | -0.008 | 5.899 | 56.286 | 0.144 | 0.003  | 0.047  | 0.551  | -0.008 | 0.593 | 34 |
| 2649 | V2AgSi  | V  | Ag | Si | l21 | 0.440  | 0.155  | 6.103 | 55.887 | 0.008 | 0.012  | 0.012  | -0.001 | 0.000  | 0.023 | 15 |
| 130  | Co2NbSb | Co | Nb | Sb | l21 | 0.728  | 0.015  | 6.156 | 55.678 | 0.450 | 0.305  | 0.305  | 0.009  | 0.004  | 0.623 | 28 |
| 2613 | Ti2YIn  | Ti | Y  | In | xa  | -0.418 | 0.001  | 7.072 | 55.587 | 0.202 | 0.000  | 0.000  | 0.007  | 0.000  | 0.007 | 14 |
| 739  | Fe2VAs  | Fe | V  | As | l21 | 0.106  | -0.095 | 5.737 | 55.033 | 0.803 | 1.062  | 1.062  | -0.234 | 0.006  | 1.896 | 26 |
| 2103 | Ru2ZrB  | Ru | Zr | B  | l21 | 1.267  | 0.066  | 6.036 | 54.528 | 0.000 | 0.000  | 0.000  | 0.000  | 0.000  | 0.000 | 23 |
| 1396 | Pd2FeSn | Pd | Fe | Sn | l21 | 0.227  | -0.238 | 6.352 | 54.319 | 0.439 | 0.069  | 0.069  | 3.075  | -0.032 | 3.181 | 32 |

|      |         |    |    |    |     |        |        |       |        |       |        |        |        |        |       |    |
|------|---------|----|----|----|-----|--------|--------|-------|--------|-------|--------|--------|--------|--------|-------|----|
| 1874 | Ru2CdGa | Ru | Cd | Ga | l21 | 0.486  | 0.200  | 6.261 | 54.047 | 0.284 | 0.571  | 0.571  | 0.013  | -0.029 | 1.126 | 21 |
| 2529 | Ti2PdSn | Ti | Pd | Sn | l21 | 0.200  | -0.344 | 6.582 | 54.003 | 0.148 | 0.732  | 0.732  | 0.104  | -0.017 | 1.551 | 22 |
| 1170 | Ni2MoBi | Ni | Mo | Bi | l21 | 0.049  | 0.502  | 6.303 | 53.584 | 0.487 | 0.131  | 0.131  | 1.628  | -0.008 | 1.882 | 31 |
| 2744 | V2MnGe  | V  | Mn | Ge | xa  | -0.295 | -0.225 | 5.919 | 53.549 | 0.563 | -0.506 | 1.549  | 1.563  | -0.021 | 2.585 | 21 |
| 2086 | Ru2YPb  | Ru | Y  | Pb | l21 | 1.505  | -0.029 | 6.689 | 53.378 | 0.000 | 0.000  | 0.000  | 0.000  | 0.000  | 0.000 | 23 |
| 2628 | Ti2ZnSn | Ti | Zn | Sn | l21 | 0.985  | -0.118 | 6.556 | 53.336 | 0.134 | 0.203  | 0.203  | 0.004  | 0.008  | 0.418 | 14 |
| 1106 | Ni2CrGe | Ni | Cr | Ge | l21 | 0.155  | -0.091 | 5.797 | 53.315 | 0.232 | 0.168  | 0.168  | 2.746  | -0.053 | 3.029 | 30 |
| 148  | Co2PdGa | Co | Pd | Ga | xa  | -0.187 | -0.116 | 5.899 | 53.162 | 0.565 | 1.649  | 1.486  | 0.077  | -0.043 | 3.169 | 31 |
| 2426 | Ti2CrIn | Ti | Cr | In | xa  | -0.064 | 0.020  | 6.523 | 53.012 | 0.496 | -0.907 | -1.102 | 2.982  | -0.015 | 0.958 | 17 |
| 1972 | Ru2NbBi | Ru | Nb | Bi | l21 | 0.796  | 0.292  | 6.544 | 52.892 | 0.599 | 0.667  | 0.667  | 0.281  | 0.042  | 1.657 | 26 |
| 729  | Fe2TiB  | Fe | Ti | B  | l21 | 0.567  | -0.141 | 5.460 | 52.822 | 0.881 | 0.537  | 0.537  | -0.165 | -0.022 | 0.887 | 23 |
| 1970 | Ru2NbAs | Ru | Nb | As | l21 | 0.388  | 0.016  | 6.268 | 52.699 | 0.518 | 0.611  | 0.611  | 0.142  | 0.078  | 1.442 | 26 |
| 676  | Fe2PdGa | Fe | Pd | Ga | xa  | -0.111 | -0.032 | 5.979 | 52.597 | 0.306 | 2.614  | -2.246 | 0.060  | 0.053  | 0.481 | 29 |
| 1421 | Pd2MnB  | Pd | Mn | B  | l21 | 0.582  | 0.206  | 5.880 | 52.481 | 0.180 | 0.141  | 0.141  | 3.678  | -0.051 | 3.909 | 30 |
| 386  | Cr2NbAl | Cr | Nb | Al | l21 | 0.546  | -0.034 | 6.146 | 52.471 | 0.009 | 1.971  | 1.971  | -0.503 | -0.037 | 3.402 | 20 |
| 2080 | Ru2YAs  | Ru | Y  | As | l21 | 1.495  | -0.269 | 6.395 | 52.428 | 0.000 | 0.000  | 0.000  | 0.000  | 0.000  | 0.000 | 24 |
| 1653 | Rh2FeBi | Rh | Fe | Bi | l21 | 0.355  | 0.160  | 6.407 | 52.272 | 0.468 | 0.282  | 0.282  | 3.141  | 0.005  | 3.710 | 31 |
| 370  | Cr2MnIn | Cr | Mn | In | xa  | -0.091 | 0.275  | 6.274 | 52.229 | 0.017 | -2.717 | 2.958  | 3.196  | -0.006 | 3.431 | 22 |
| 793  | Mn2AgAl | Mn | Ag | Al | xa  | -0.395 | -0.015 | 6.167 | 52.150 | 0.684 | 3.346  | -3.070 | 0.011  | 0.004  | 0.291 | 18 |
| 2581 | Ti2TiPb | Ti | Ti | Pb | xa  | 0.000  | 0.071  | 6.686 | 52.043 | 0.236 | 0.946  | 0.208  | 0.207  | -0.050 | 1.311 | 16 |
| 2681 | V2CoSb  | V  | Co | Sb | xa  | -0.372 | 0.070  | 6.099 | 51.909 | 0.477 | 0.134  | -0.156 | 0.109  | -0.001 | 0.086 | 24 |
| 1897 | Ru2CrGe | Ru | Cr | Ge | l21 | 1.587  | -0.194 | 6.003 | 51.812 | 0.648 | -0.147 | -0.147 | 2.214  | 0.006  | 1.926 | 26 |
| 2799 | V2PtGe  | V  | Pt | Ge | l21 | 0.016  | -0.168 | 6.176 | 51.690 | 0.205 | 1.252  | 1.252  | 0.080  | -0.020 | 2.564 | 24 |
| 2400 | Ti2CdB  | Ti | Cd | B  | l21 | 1.520  | 0.372  | 6.193 | 51.559 | 0.104 | 0.064  | 0.064  | 0.002  | -0.003 | 0.127 | 13 |
| 2660 | V2AuSi  | V  | Au | Si | l21 | 0.521  | -0.011 | 6.135 | 51.488 | 0.087 | 0.038  | 0.038  | -0.001 | -0.002 | 0.073 | 15 |
| 2568 | Ti2ScGe | Ti | Sc | Ge | xa  | -0.344 | -0.223 | 6.551 | 51.438 | 0.503 | 1.202  | 0.405  | 0.097  | -0.044 | 1.660 | 15 |
| 379  | Cr2MoGa | Cr | Mo | Ga | l21 | 0.425  | 0.024  | 6.020 | 51.127 | 0.043 | 1.746  | 1.746  | -0.655 | -0.034 | 2.803 | 21 |
| 2828 | V2ScAs  | V  | Sc | As | xa  | -0.828 | -0.167 | 6.267 | 51.064 | 0.586 | -0.994 | 1.288  | -0.231 | -0.009 | 0.054 | 18 |
| 85   | Co2HfPb | Co | Hf | Pb | l21 | 1.782  | -0.051 | 6.336 | 50.945 | 1.000 | 1.076  | 1.076  | -0.107 | 0.021  | 2.066 | 26 |

|      |         |    |    |    |     |        |        |       |        |       |        |        |        |        |       |    |
|------|---------|----|----|----|-----|--------|--------|-------|--------|-------|--------|--------|--------|--------|-------|----|
| 570  | Fe2CoSb | Fe | Co | Sb | l21 | 0.141  | 0.179  | 5.955 | 50.910 | 0.650 | 1.905  | 1.905  | 1.591  | -0.056 | 5.345 | 30 |
| 2751 | V2MoAs  | V  | Mo | As | xa  | -0.106 | -0.056 | 6.082 | 50.893 | 0.002 | -0.166 | 0.608  | 0.122  | -0.006 | 0.558 | 21 |
| 2693 | V2CrSi  | V  | Cr | Si | xa  | -0.112 | -0.273 | 5.853 | 50.613 | 0.340 | -0.259 | 1.066  | 0.813  | -0.020 | 1.600 | 20 |
| 2183 | Sc2FeGe | Sc | Fe | Ge | l21 | 0.653  | -0.419 | 6.517 | 50.434 | 0.031 | -0.224 | -0.224 | 1.880  | 0.062  | 1.494 | 18 |
| 979  | Mn2RuSn | Mn | Ru | Sn | xa  | -1.427 | -0.056 | 6.171 | 50.273 | 0.443 | 3.361  | -1.959 | 0.269  | 0.049  | 1.720 | 26 |
| 63   | Co2CuPb | Co | Cu | Pb | l21 | 0.289  | 0.407  | 6.032 | 50.209 | 0.349 | 0.100  | 0.100  | -0.006 | -0.016 | 0.178 | 23 |
| 2692 | V2CrSb  | V  | Cr | Sb | xa  | -0.303 | 0.057  | 6.206 | 50.171 | 0.097 | -0.938 | 1.557  | 2.022  | -0.019 | 2.622 | 21 |
| 1554 | Pd2YBi  | Pd | Y  | Bi | l21 | 0.798  | -0.742 | 6.939 | 49.971 | 0.000 | 0.000  | 0.000  | 0.000  | 0.000  | 0.000 | 28 |
| 1988 | Ru2NiSb | Ru | Ni | Sb | l21 | 0.838  | 0.074  | 6.158 | 49.724 | 0.324 | 0.437  | 0.437  | 0.738  | -0.015 | 1.597 | 31 |
| 592  | Fe2CuSb | Fe | Cu | Sb | l21 | 0.550  | 0.238  | 6.017 | 49.625 | 0.574 | 1.949  | 1.949  | 0.096  | -0.075 | 3.919 | 22 |
| 1618 | Rh2CoAs | Rh | Co | As | l21 | 0.434  | -0.002 | 6.014 | 49.510 | 0.712 | 0.089  | 0.089  | 1.611  | -0.027 | 1.762 | 32 |
| 845  | Mn2CrSb | Mn | Cr | Sb | xa  | -0.170 | 0.072  | 6.046 | 49.457 | 0.989 | 3.032  | -0.437 | -1.650 | 0.049  | 0.994 | 25 |
| 887  | Mn2IrIn | Mn | Ir | In | xa  | -0.300 | -0.088 | 6.294 | 49.258 | 0.048 | 3.611  | -3.240 | 0.187  | 0.054  | 0.612 | 26 |
| 2531 | Ti2PtAs | Ti | Pt | As | l21 | 1.408  | -0.612 | 6.357 | 49.212 | 0.126 | 0.171  | 0.171  | 0.015  | 0.001  | 0.358 | 23 |
| 1213 | Ni2PtB  | Ni | Pt | B  | xa  | -0.829 | 0.215  | 5.580 | 48.544 | 0.000 | 0.000  | 0.000  | 0.000  | 0.000  | 0.000 | 33 |
| 2846 | V2TiSb  | V  | Ti | Sb | xa  | -0.125 | -0.067 | 6.325 | 48.510 | 0.012 | -0.244 | 0.583  | -0.076 | -0.001 | 0.262 | 19 |
| 2674 | V2CoAs  | V  | Co | As | l21 | 0.112  | -0.084 | 5.899 | 48.494 | 0.411 | -0.044 | -0.044 | 0.967  | 0.027  | 0.906 | 24 |
| 2746 | V2MnPb  | V  | Mn | Pb | xa  | -0.110 | 0.318  | 6.299 | 48.300 | 0.751 | -1.069 | 1.603  | 2.316  | -0.008 | 2.842 | 21 |
| 782  | Fe2ZrAl | Fe | Zr | Al | l21 | 1.665  | -0.325 | 6.041 | 48.266 | 0.806 | 0.544  | 0.544  | -0.119 | -0.013 | 0.956 | 23 |
| 277  | Cr2AuAs | Cr | Au | As | l21 | 0.364  | 0.245  | 6.460 | 47.858 | 0.272 | 3.616  | 3.616  | 0.092  | -0.125 | 7.199 | 18 |
| 261  | Co2ZrPb | Co | Zr | Pb | l21 | 1.609  | -0.071 | 6.369 | 47.704 | 0.991 | 1.092  | 1.092  | -0.103 | 0.010  | 2.091 | 26 |
| 2667 | V2CdGe  | V  | Cd | Ge | l21 | 0.508  | 0.321  | 6.307 | 47.403 | 0.036 | 0.957  | 0.957  | 0.029  | -0.014 | 1.929 | 16 |
| 2304 | Sc2ScGe | Sc | Sc | Ge | xa  | 0.000  | -0.214 | 6.907 | 47.329 | 0.413 | 0.556  | 0.307  | 0.307  | -0.028 | 1.142 | 13 |
| 1961 | Ru2MoBi | Ru | Mo | Bi | xa  | -0.027 | 0.618  | 6.450 | 46.954 | 0.258 | 0.725  | 0.221  | -0.094 | 0.013  | 0.865 | 27 |
| 765  | Fe2YGe  | Fe | Y  | Ge | xa  | -0.056 | 0.011  | 6.418 | 46.902 | 0.184 | 0.000  | 0.000  | 0.001  | 0.000  | 0.001 | 23 |
| 1107 | Ni2CrIn | Ni | Cr | In | l21 | 0.568  | 0.039  | 6.043 | 46.629 | 0.170 | 0.273  | 0.273  | 2.916  | -0.085 | 3.377 | 29 |
| 1175 | Ni2MoSb | Ni | Mo | Sb | xa  | -0.193 | 0.176  | 6.159 | 46.445 | 0.002 | 0.001  | 0.000  | 0.002  | 0.000  | 0.003 | 31 |
| 1552 | Pd2YAs  | Pd | Y  | As | l21 | 0.164  | -0.752 | 6.650 | 46.437 | 0.000 | 0.000  | 0.000  | 0.000  | 0.000  | 0.000 | 28 |
| 2792 | V2PdSi  | V  | Pd | Si | xa  | -0.146 | -0.186 | 6.003 | 46.331 | 0.665 | -0.269 | 0.309  | -0.016 | 0.000  | 0.024 | 24 |

|      |         |    |    |    |     |        |        |       |        |       |        |        |        |        |       |    |
|------|---------|----|----|----|-----|--------|--------|-------|--------|-------|--------|--------|--------|--------|-------|----|
| 2375 | Sc2ZrSn | Sc | Zr | Sn | l21 | 0.036  | -0.236 | 7.126 | 46.327 | 0.536 | 0.278  | 0.278  | 0.868  | -0.049 | 1.375 | 14 |
| 1964 | Ru2MoIn | Ru | Mo | In | l21 | 1.253  | 0.136  | 6.323 | 46.261 | 0.701 | 0.070  | 0.070  | 0.453  | -0.005 | 0.588 | 25 |
| 1282 | Ni2WGe  | Ni | W  | Ge | xa  | -0.281 | 0.113  | 5.937 | 46.105 | 0.054 | 0.019  | 0.010  | 0.021  | 0.004  | 0.054 | 30 |
| 1811 | Rh2WPb  | Rh | W  | Pb | l21 | 0.101  | 0.442  | 6.457 | 45.948 | 0.059 | 0.009  | 0.009  | 0.058  | 0.001  | 0.077 | 28 |
| 2820 | V2RuGa  | V  | Ru | Ga | xa  | -0.786 | -0.265 | 6.049 | 45.795 | 0.163 | -0.083 | 1.783  | 0.257  | 0.013  | 1.970 | 21 |
| 795  | Mn2AgB  | Mn | Ag | B  | xa  | -0.240 | 0.573  | 5.821 | 45.634 | 0.374 | 3.250  | -2.823 | 0.031  | 0.037  | 0.495 | 18 |
| 2220 | Sc2MnSi | Sc | Mn | Si | l21 | 0.332  | -0.312 | 6.399 | 45.616 | 0.003 | -0.059 | -0.059 | 0.472  | -0.006 | 0.348 | 17 |
| 2852 | V2VBi   | V  | V  | Bi | xa  | 0.000  | 0.347  | 6.375 | 45.607 | 0.580 | -0.696 | 1.225  | 1.224  | 0.014  | 1.767 | 20 |
| 2316 | Sc2TiIn | Sc | Ti | In | l21 | 0.365  | -0.158 | 7.047 | 45.570 | 0.125 | 0.331  | 0.331  | 1.568  | -0.070 | 2.160 | 13 |
| 936  | Mn2PdAl | Mn | Pd | Al | xa  | -0.649 | -0.363 | 6.060 | 45.558 | 0.173 | 3.471  | -2.827 | 0.106  | 0.014  | 0.764 | 27 |
| 306  | Cr2CoSb | Cr | Co | Sb | xa  | -0.906 | 0.164  | 6.038 | 45.489 | 0.941 | 2.523  | -1.511 | 0.987  | -0.002 | 1.997 | 26 |
| 1709 | Rh2NbGa | Rh | Nb | Ga | l21 | 1.053  | -0.492 | 6.250 | 45.450 | 0.146 | 0.040  | 0.040  | 0.021  | 0.003  | 0.104 | 26 |
| 924  | Mn2NbSn | Mn | Nb | Sn | l21 | 0.850  | -0.080 | 6.183 | 45.397 | 0.966 | 0.653  | 0.653  | -0.288 | -0.032 | 0.986 | 23 |
| 1858 | Ru2AgSn | Ru | Ag | Sn | l21 | 0.430  | 0.296  | 6.376 | 45.139 | 0.411 | 0.500  | 0.500  | 0.080  | -0.030 | 1.050 | 21 |
| 66   | Co2CuSn | Co | Cu | Sn | l21 | 0.595  | 0.079  | 5.927 | 44.862 | 0.042 | 0.094  | 0.094  | -0.004 | -0.015 | 0.169 | 23 |
| 1665 | Rh2HfGa | Rh | Hf | Ga | l21 | 1.965  | -0.891 | 6.294 | 44.858 | 0.241 | 0.058  | 0.058  | 0.001  | 0.007  | 0.124 | 25 |
| 1911 | Ru2CuSb | Ru | Cu | Sb | l21 | 1.081  | 0.085  | 6.185 | 44.857 | 0.097 | 0.054  | 0.054  | 0.022  | -0.003 | 0.127 | 22 |
| 2709 | V2FeBi  | V  | Fe | Bi | l21 | 0.042  | 0.424  | 6.339 | 44.729 | 0.203 | -0.888 | -0.888 | 2.588  | 0.036  | 0.848 | 23 |
| 2868 | V2WSb   | V  | W  | Sb | l21 | 0.302  | 0.163  | 6.300 | 44.573 | 0.021 | 0.562  | 0.562  | -0.191 | -0.008 | 0.925 | 21 |
| 2064 | Ru2VPb  | Ru | V  | Pb | l21 | 1.211  | 0.244  | 6.320 | 44.380 | 0.078 | 0.038  | 0.038  | -0.008 | -0.003 | 0.065 | 25 |
| 2178 | Sc2FeAl | Sc | Fe | Al | l21 | 0.430  | -0.236 | 6.525 | 44.092 | 0.080 | -0.142 | -0.142 | 0.896  | -0.012 | 0.600 | 17 |
| 2893 | V2ZrAl  | V  | Zr | Al | xa  | -0.227 | -0.033 | 6.431 | 43.943 | 0.351 | 1.357  | -1.531 | 0.264  | -0.001 | 0.089 | 17 |
| 2551 | Ti2RhSn | Ti | Rh | Sn | xa  | -0.468 | -0.447 | 6.470 | 43.881 | 1.000 | 0.834  | 1.533  | 0.133  | 0.010  | 2.510 | 21 |
| 878  | Mn2HfSb | Mn | Hf | Sb | l21 | 1.536  | -0.182 | 6.229 | 43.829 | 0.949 | 0.586  | 0.586  | -0.145 | -0.023 | 1.004 | 23 |
| 1278 | Ni2WAs  | Ni | W  | As | xa  | -1.056 | 0.143  | 5.950 | 43.755 | 0.000 | 0.000  | 0.000  | 0.000  | 0.000  | 0.000 | 31 |
| 2824 | V2RuSb  | V  | Ru | Sb | xa  | -0.777 | -0.057 | 6.229 | 43.717 | 0.495 | -0.525 | 1.088  | 0.203  | 0.003  | 0.769 | 23 |
| 628  | Fe2MnAl | Fe | Mn | Al | xa  | -0.329 | -0.159 | 5.713 | 43.697 | 0.225 | 2.307  | 1.361  | -1.661 | 0.001  | 2.008 | 26 |
| 1759 | Rh2RhSn | Rh | Rh | Sn | xa  | 0.000  | -0.119 | 6.298 | 43.425 | 0.011 | 0.051  | 0.042  | 0.042  | -0.001 | 0.134 | 31 |
| 2379 | Ti2AgBi | Ti | Ag | Bi | l21 | 0.959  | 0.098  | 6.754 | 43.357 | 0.028 | 0.048  | 0.048  | 0.000  | 0.000  | 0.096 | 14 |



|      |         |    |    |    |     |        |        |       |        |       |        |        |        |        |       |    |
|------|---------|----|----|----|-----|--------|--------|-------|--------|-------|--------|--------|--------|--------|-------|----|
| 404  | Cr2NiPb | Cr | Ni | Pb | xa  | -0.540 | 0.445  | 6.287 | 43.173 | 0.244 | 3.186  | -2.910 | 0.185  | -0.036 | 0.425 | 26 |
| 2768 | V2NbPb  | V  | Nb | Pb | l21 | 0.400  | 0.305  | 6.488 | 42.992 | 0.674 | 0.695  | 0.695  | -0.202 | -0.009 | 1.179 | 19 |
| 1224 | Ni2RhB  | Ni | Rh | B  | xa  | -1.081 | 0.169  | 5.507 | 42.885 | 0.284 | 0.266  | 0.103  | 0.121  | -0.006 | 0.484 | 32 |
| 134  | Co2NiAs | Co | Ni | As | l21 | 0.305  | 0.008  | 5.677 | 42.706 | 0.611 | 1.025  | 1.025  | 0.308  | -0.007 | 2.351 | 33 |
| 2308 | Sc2ScSi | Sc | Sc | Si | xa  | 0.000  | -0.181 | 6.826 | 42.550 | 0.006 | 0.401  | 0.234  | 0.234  | -0.019 | 0.850 | 13 |
| 501  | Cr2YGe  | Cr | Y  | Ge | xa  | -0.583 | 0.100  | 6.655 | 42.419 | 0.598 | 0.000  | 0.000  | 0.011  | 0.000  | 0.011 | 19 |
| 2172 | Sc2CuGe | Sc | Cu | Ge | l21 | 2.199  | -0.531 | 6.582 | 42.304 | 0.089 | 0.054  | 0.054  | 0.012  | -0.005 | 0.115 | 11 |
| 914  | Mn2NbAl | Mn | Nb | Al | l21 | 1.181  | -0.321 | 6.002 | 42.023 | 1.000 | 1.213  | 1.213  | -0.415 | -0.025 | 1.986 | 22 |
| 2180 | Sc2FeB  | Sc | Fe | B  | l21 | 0.985  | 0.014  | 6.104 | 41.919 | 0.066 | -0.083 | -0.083 | 0.644  | 0.000  | 0.478 | 17 |
| 1055 | Mn2ZrSi | Mn | Zr | Si | l21 | 1.112  | -0.395 | 5.990 | 41.909 | 1.000 | 1.121  | 1.121  | -0.203 | -0.040 | 1.999 | 22 |
| 414  | Cr2PdIn | Cr | Pd | In | xa  | -0.714 | 0.069  | 6.377 | 41.776 | 0.239 | 3.322  | -3.086 | 0.147  | -0.036 | 0.347 | 25 |
| 2467 | Ti2IrBi | Ti | Ir | Bi | l21 | 0.313  | -0.094 | 6.632 | 41.737 | 0.461 | 0.758  | 0.758  | 0.116  | 0.030  | 1.662 | 22 |
| 2582 | Ti2TiSb | Ti | Ti | Sb | l21 | 0.000  | -0.209 | 6.554 | 41.606 | 0.464 | 0.100  | 0.100  | 0.295  | -0.011 | 0.484 | 17 |
| 2458 | Ti2HfGe | Ti | Hf | Ge | l21 | 0.030  | -0.169 | 6.496 | 41.572 | 0.004 | 0.018  | 0.018  | 0.021  | -0.001 | 0.056 | 16 |
| 953  | Mn2PtIn | Mn | Pt | In | xa  | -0.315 | -0.228 | 6.358 | 41.336 | 0.199 | 3.685  | -3.486 | 0.045  | 0.015  | 0.259 | 27 |
| 2701 | V2CuIn  | V  | Cu | In | xa  | -0.250 | 0.319  | 6.287 | 41.282 | 0.228 | 1.527  | -1.518 | 0.064  | -0.065 | 0.008 | 14 |
| 304  | Cr2CoIn | Cr | Co | In | xa  | -1.203 | 0.293  | 6.112 | 41.230 | 0.810 | 2.476  | -2.739 | 0.550  | -0.121 | 0.166 | 24 |
| 2780 | V2NiSb  | V  | Ni | Sb | xa  | -0.029 | 0.085  | 6.151 | 41.053 | 0.403 | 0.941  | -0.546 | 0.350  | -0.003 | 0.742 | 25 |
| 2898 | V2ZrGe  | V  | Zr | Ge | xa  | -0.103 | -0.103 | 6.364 | 41.044 | 0.263 | -0.844 | 1.342  | -0.330 | -0.004 | 0.164 | 18 |
| 2305 | Sc2ScIn | Sc | Sc | In | xa  | 0.000  | -0.178 | 7.207 | 41.022 | 0.534 | 0.415  | 0.273  | 0.273  | -0.024 | 0.937 | 12 |
| 2872 | V2YAs   | V  | Y  | As | xa  | -0.774 | 0.030  | 6.574 | 40.936 | 0.233 | 0.000  | 0.000  | 0.007  | 0.000  | 0.007 | 18 |
| 347  | Cr2HfGe | Cr | Hf | Ge | l21 | 0.648  | 0.008  | 6.193 | 40.886 | 0.826 | 1.944  | 1.944  | -0.082 | -0.069 | 3.737 | 20 |
| 1949 | Ru2MnB  | Ru | Mn | B  | l21 | 1.925  | 0.025  | 5.677 | 40.870 | 0.745 | -0.172 | -0.172 | 2.371  | 0.031  | 2.058 | 26 |
| 2724 | V2HfPb  | V  | Hf | Pb | xa  | -0.050 | 0.344  | 6.663 | 40.642 | 0.443 | -1.223 | 1.731  | -0.417 | 0.007  | 0.098 | 18 |
| 999  | Mn2TiSb | Mn | Ti | Sb | l21 | 1.062  | -0.264 | 6.064 | 40.497 | 0.893 | 0.653  | 0.653  | -0.288 | -0.020 | 0.998 | 23 |
| 2473 | Ti2IrSi | Ti | Ir | Si | xa  | -0.399 | -0.613 | 6.163 | 40.331 | 0.401 | 0.627  | 1.504  | 0.110  | -0.011 | 2.230 | 21 |
| 2419 | Ti2CoSn | Ti | Co | Sn | xa  | -0.060 | -0.162 | 6.351 | 40.213 | 1.000 | 0.758  | 1.452  | 0.387  | 0.014  | 2.611 | 21 |
| 808  | Mn2AuGa | Mn | Au | Ga | xa  | -0.215 | -0.111 | 6.225 | 40.197 | 0.180 | 3.508  | -3.356 | 0.025  | 0.015  | 0.192 | 18 |
| 320  | Cr2CuAl | Cr | Cu | Al | xa  | -0.880 | 0.077  | 5.893 | 40.194 | 0.461 | 2.472  | -1.615 | 0.151  | -0.001 | 1.007 | 16 |

|      |         |    |    |    |     |        |        |       |        |       |        |        |        |        |       |    |
|------|---------|----|----|----|-----|--------|--------|-------|--------|-------|--------|--------|--------|--------|-------|----|
| 319  | Cr2CrSn | Cr | Cr | Sn | l21 | 0.000  | 0.270  | 6.181 | 40.021 | 0.970 | 2.194  | 2.194  | -2.464 | -0.011 | 1.913 | 22 |
| 947  | Mn2PtAl | Mn | Pt | Al | xa  | -0.740 | -0.494 | 6.067 | 39.677 | 0.269 | 3.444  | -2.961 | 0.103  | 0.018  | 0.604 | 27 |
| 1155 | Ni2IrSn | Ni | Ir | Sn | xa  | -0.164 | -0.040 | 6.101 | 39.661 | 0.003 | 0.002  | 0.000  | 0.000  | 0.000  | 0.002 | 33 |
| 2246 | Sc2NiB  | Sc | Ni | B  | l21 | 1.633  | -0.210 | 6.153 | 39.636 | 0.005 | 0.001  | 0.001  | 0.011  | 0.004  | 0.017 | 19 |
| 1127 | Ni2FeGa | Ni | Fe | Ga | l21 | 0.158  | -0.214 | 5.741 | 39.631 | 0.549 | 0.287  | 0.287  | 2.829  | -0.047 | 3.356 | 31 |
| 862  | Mn2FeBi | Mn | Fe | Bi | xa  | -0.601 | 0.419  | 6.308 | 39.406 | 0.469 | -3.458 | 3.022  | 1.964  | -0.057 | 1.471 | 27 |
| 2447 | Ti2FeGe | Ti | Fe | Ge | l21 | 0.409  | -0.365 | 6.171 | 39.386 | 0.281 | -0.074 | -0.074 | 2.048  | 0.056  | 1.956 | 20 |
| 481  | Cr2VPb  | Cr | V  | Pb | l21 | 0.270  | 0.449  | 6.281 | 39.261 | 0.738 | 2.159  | 2.159  | -1.386 | -0.018 | 2.914 | 21 |
| 2471 | Ti2IrPb | Ti | Ir | Pb | xa  | -0.110 | -0.117 | 6.560 | 39.090 | 0.527 | 0.711  | 1.547  | 0.099  | 0.029  | 2.386 | 21 |
| 2418 | Ti2CoSi | Ti | Co | Si | l21 | 0.262  | -0.422 | 6.067 | 38.739 | 0.044 | 0.418  | 0.418  | 1.333  | 0.049  | 2.218 | 21 |
| 2550 | Ti2RhSi | Ti | Rh | Si | xa  | -0.235 | -0.588 | 6.165 | 38.664 | 0.386 | 0.795  | 1.547  | 0.145  | -0.022 | 2.465 | 21 |
| 2482 | Ti2MnPb | Ti | Mn | Pb | l21 | 0.061  | 0.095  | 6.533 | 38.618 | 0.081 | -0.646 | -0.646 | 2.350  | 0.021  | 1.079 | 19 |
| 1425 | Pd2MnIn | Pd | Mn | In | l21 | 0.657  | -0.451 | 6.398 | 38.570 | 0.330 | 0.110  | 0.110  | 3.932  | -0.075 | 4.077 | 30 |
| 2465 | Ti2IrAs | Ti | Ir | As | l21 | 0.593  | -0.488 | 6.316 | 38.408 | 0.009 | 0.002  | 0.002  | 0.000  | 0.000  | 0.004 | 22 |
| 2175 | Sc2CuSb | Sc | Cu | Sb | l21 | 1.788  | -0.438 | 6.825 | 38.106 | 0.010 | 0.097  | 0.097  | 0.003  | -0.006 | 0.191 | 12 |
| 1491 | Pd2RhIn | Pd | Rh | In | xa  | -0.183 | -0.288 | 6.368 | 38.019 | 0.005 | 0.000  | 0.000  | 0.000  | 0.000  | 0.000 | 32 |
| 829  | Mn2CoBi | Mn | Co | Bi | xa  | -0.807 | 0.328  | 6.267 | 38.014 | 0.140 | 3.399  | -3.163 | 0.276  | 0.011  | 0.523 | 28 |
| 1623 | Rh2CoIn | Rh | Co | In | l21 | 0.561  | -0.083 | 6.207 | 37.866 | 0.881 | 0.535  | 0.535  | 2.031  | -0.038 | 3.063 | 30 |
| 797  | Mn2AgGa | Mn | Ag | Ga | xa  | -0.243 | 0.030  | 6.195 | 37.743 | 0.208 | 3.492  | -3.193 | 0.021  | 0.012  | 0.332 | 18 |
| 1047 | Mn2ZrAs | Mn | Zr | As | l21 | 0.705  | -0.205 | 6.033 | 37.702 | 0.963 | 0.582  | 0.582  | -0.131 | -0.025 | 1.008 | 23 |
| 290  | Cr2CdBi | Cr | Cd | Bi | l21 | 0.076  | 0.557  | 6.946 | 37.679 | 0.199 | 3.764  | 3.764  | -0.023 | -0.138 | 7.367 | 19 |
| 2546 | Ti2RhGe | Ti | Rh | Ge | xa  | -0.044 | -0.511 | 6.249 | 37.630 | 0.442 | 0.811  | 1.533  | 0.137  | -0.010 | 2.471 | 21 |
| 2083 | Ru2YGa  | Ru | Y  | Ga | l21 | 0.951  | -0.206 | 6.419 | 37.510 | 0.002 | 0.000  | 0.000  | 0.000  | 0.000  | 0.000 | 22 |
| 2769 | V2NbSb  | V  | Nb | Sb | l21 | 0.410  | -0.028 | 6.394 | 37.498 | 0.522 | 1.046  | 1.046  | -0.249 | -0.017 | 1.826 | 20 |
| 275  | Cr2AgSn | Cr | Ag | Sn | xa  | -0.180 | 0.333  | 6.521 | 37.449 | 0.150 | 3.437  | -3.249 | 0.040  | -0.028 | 0.200 | 17 |
| 1439 | Pd2MoSi | Pd | Mo | Si | xa  | -0.950 | -0.164 | 6.163 | 37.393 | 0.176 | 0.053  | 0.020  | 0.205  | 0.007  | 0.285 | 30 |
| 2177 | Sc2CuSn | Sc | Cu | Sn | l21 | 1.637  | -0.425 | 6.838 | 37.355 | 0.172 | 0.134  | 0.134  | 0.019  | -0.011 | 0.276 | 11 |
| 2718 | V2HfAs  | V  | Hf | As | xa  | -0.009 | -0.009 | 6.298 | 37.211 | 0.001 | 0.000  | 0.001  | 0.000  | 0.000  | 0.001 | 19 |
| 543  | Fe2AuBi | Fe | Au | Bi | l21 | 0.883  | 0.435  | 6.466 | 37.010 | 0.819 | 2.543  | 2.543  | 0.032  | -0.113 | 5.005 | 22 |

|      |         |    |    |    |     |        |        |       |        |       |        |        |        |        |       |    |
|------|---------|----|----|----|-----|--------|--------|-------|--------|-------|--------|--------|--------|--------|-------|----|
| 668  | Fe2NiPb | Fe | Ni | Pb | l21 | 0.071  | 0.466  | 6.112 | 36.919 | 0.555 | 2.355  | 2.355  | 0.449  | -0.149 | 5.010 | 30 |
| 2151 | Sc2CoIn | Sc | Co | In | l21 | 0.311  | -0.279 | 6.748 | 36.778 | 0.295 | -0.137 | -0.137 | 1.125  | 0.024  | 0.875 | 18 |
| 128  | Co2NbIn | Co | Nb | In | l21 | 1.592  | -0.095 | 6.177 | 36.756 | 1.000 | 1.057  | 1.057  | -0.056 | -0.020 | 2.038 | 26 |
| 2523 | Ti2PdGa | Ti | Pd | Ga | xa  | -0.016 | -0.423 | 6.331 | 36.599 | 1.000 | 1.005  | 1.467  | 0.095  | -0.022 | 2.545 | 21 |
| 2803 | V2PtSi  | V  | Pt | Si | xa  | -0.375 | -0.322 | 5.993 | 36.368 | 0.008 | -0.001 | 0.001  | 0.000  | 0.000  | 0.000 | 24 |
| 184  | Co2RuPb | Co | Ru | Pb | l21 | 0.284  | 0.526  | 6.174 | 36.362 | 0.595 | 1.505  | 1.505  | 1.375  | -0.060 | 4.325 | 30 |
| 92   | Co2IrBi | Co | Ir | Bi | l21 | 0.221  | 0.508  | 6.269 | 36.230 | 0.858 | 1.569  | 1.569  | 0.486  | -0.032 | 3.592 | 32 |
| 2569 | Ti2ScIn | Ti | Sc | In | xa  | -0.393 | -0.079 | 6.859 | 36.171 | 0.000 | 1.399  | 0.958  | 0.257  | -0.072 | 2.542 | 14 |
| 1677 | Rh2IrGe | Rh | Ir | Ge | xa  | -0.247 | 0.025  | 6.142 | 36.141 | 0.000 | 0.000  | 0.000  | 0.000  | 0.000  | 0.000 | 31 |
| 1002 | Mn2VAl  | Mn | V  | Al | l21 | 0.957  | -0.383 | 5.802 | 35.808 | 0.976 | 1.415  | 1.415  | -0.802 | -0.021 | 2.007 | 22 |
| 1051 | Mn2ZrGe | Mn | Zr | Ge | l21 | 0.966  | -0.262 | 6.077 | 35.772 | 0.992 | 1.149  | 1.149  | -0.241 | -0.052 | 2.005 | 22 |
| 2186 | Sc2FeSb | Sc | Fe | Sb | l21 | 0.972  | -0.362 | 6.752 | 35.677 | 0.168 | -0.344 | -0.344 | 2.111  | 0.059  | 1.482 | 19 |
| 2837 | V2ScSn  | V  | Sc | Sn | xa  | -0.638 | -0.044 | 6.583 | 35.553 | 0.346 | -1.474 | 1.936  | -0.180 | 0.020  | 0.302 | 17 |
| 2326 | Sc2VGe  | Sc | V  | Ge | l21 | 0.347  | -0.205 | 6.667 | 35.466 | 0.740 | 0.098  | 0.098  | 2.245  | -0.062 | 2.379 | 15 |
| 2834 | V2ScPb  | V  | Sc | Pb | xa  | -0.693 | 0.195  | 6.675 | 35.351 | 0.330 | -1.543 | 2.102  | -0.179 | 0.030  | 0.410 | 17 |
| 2525 | Ti2PdIn | Ti | Pd | In | xa  | -0.308 | -0.310 | 6.546 | 35.296 | 1.000 | 1.008  | 1.430  | 0.086  | -0.018 | 2.506 | 21 |
| 458  | Cr2ScIn | Cr | Sc | In | xa  | -0.690 | 0.099  | 6.610 | 35.036 | 0.555 | -3.124 | 3.268  | -0.201 | 0.059  | 0.002 | 18 |
| 1942 | Ru2IrIn | Ru | Ir | In | l21 | 0.109  | 0.328  | 6.300 | 34.995 | 0.400 | 0.039  | 0.039  | 0.168  | 0.001  | 0.247 | 28 |
| 409  | Cr2PdAs | Cr | Pd | As | xa  | -0.215 | 0.117  | 6.176 | 34.924 | 0.398 | 3.240  | -2.786 | 0.090  | 0.040  | 0.584 | 27 |
| 2885 | V2ZnBi  | V  | Zn | Bi | l21 | 0.465  | 0.482  | 6.632 | 34.879 | 0.363 | 2.287  | 2.287  | 0.026  | -0.024 | 4.576 | 17 |
| 2311 | Sc2TiAs | Sc | Ti | As | l21 | 0.357  | -0.255 | 6.735 | 34.869 | 0.447 | 0.242  | 0.242  | 1.455  | -0.036 | 1.903 | 15 |
| 2830 | V2ScBi  | V  | Sc | Bi | xa  | -0.551 | 0.171  | 6.686 | 34.741 | 0.959 | -1.622 | 1.964  | -0.308 | 0.001  | 0.035 | 18 |
| 1883 | Ru2CoB  | Ru | Co | B  | l21 | 1.269  | 0.249  | 5.615 | 34.627 | 0.703 | -0.006 | -0.006 | 0.174  | 0.002  | 0.164 | 28 |
| 2156 | Sc2CrAl | Sc | Cr | Al | l21 | 0.223  | -0.092 | 6.750 | 34.570 | 0.518 | -0.074 | -0.074 | 3.261  | -0.037 | 3.076 | 15 |
| 2432 | Ti2CuAs | Ti | Cu | As | l21 | 1.710  | -0.330 | 6.216 | 34.444 | 0.004 | 0.002  | 0.002  | 0.000  | 0.000  | 0.004 | 14 |
| 1918 | Ru2FeGa | Ru | Fe | Ga | l21 | 0.969  | -0.140 | 5.980 | 34.230 | 0.657 | 0.178  | 0.178  | 2.755  | 0.017  | 3.128 | 27 |
| 1000 | Mn2TiSi | Mn | Ti | Si | l21 | 1.219  | -0.588 | 5.771 | 34.127 | 0.947 | 1.173  | 1.173  | -0.351 | -0.038 | 1.957 | 22 |
| 1193 | Ni2NiGa | Ni | Ni | Ga | l21 | 0.002  | -0.261 | 5.671 | 33.934 | 0.000 | 0.000  | 0.000  | 0.001  | 0.000  | 0.001 | 33 |
| 509  | Cr2ZnB  | Cr | Zn | B  | xa  | -0.008 | 0.514  | 5.542 | 33.909 | 0.223 | -0.451 | 0.539  | -0.007 | 0.004  | 0.085 | 17 |

|      |         |    |    |    |     |          |        |       |        |       |        |        |        |        |       |    |
|------|---------|----|----|----|-----|----------|--------|-------|--------|-------|--------|--------|--------|--------|-------|----|
| 1162 | Ni2MnIn | Ni | Mn | In | l21 | 0.615    | -0.143 | 6.040 | 33.768 | 0.199 | 0.340  | 0.340  | 3.551  | -0.102 | 4.129 | 30 |
| 1908 | Ru2CuGe | Ru | Cu | Ge | l21 | 0.893    | 0.012  | 5.975 | 33.685 | 0.052 | 0.017  | 0.017  | 0.005  | -0.001 | 0.038 | 21 |
| 2322 | Sc2VAs  | Sc | V  | As | l21 | 0.331    | -0.207 | 6.623 | 33.673 | 0.358 | -0.051 | -0.051 | 1.952  | -0.028 | 1.822 | 16 |
| 2145 | Sc2CoAl | Sc | Co | Al | l21 | 0.281    | -0.345 | 6.531 | 33.445 | 0.061 | -0.073 | -0.073 | 0.501  | 0.008  | 0.363 | 18 |
| 1176 | Ni2MoSi | Ni | Mo | Si | xa  | -0.489   | -0.194 | 5.818 | 33.331 | 0.007 | 0.022  | 0.008  | 0.022  | 0.002  | 0.054 | 30 |
| 2068 | Ru2WAl  | Ru | W  | Al | l21 | 1.845    | -0.306 | 6.126 | 33.279 | 0.203 | 0.067  | 0.067  | 0.013  | -0.001 | 0.146 | 25 |
| 2767 | V2NbIn  | V  | Nb | In | l21 | 0.375    | 0.126  | 6.416 | 33.207 | 0.109 | 0.013  | 0.013  | -0.011 | 0.000  | 0.015 | 18 |
| 1904 | Ru2CuAs | Ru | Cu | As | l21 | 1.119    | 0.061  | 5.978 | 33.123 | 0.049 | 0.143  | 0.143  | 0.053  | -0.008 | 0.331 | 22 |
| 2565 | Ti2ScB  | Ti | Sc | B  | xa  | -0.290   | 0.330  | 6.233 | 32.892 | 0.173 | 1.393  | 0.668  | 0.225  | -0.052 | 2.234 | 14 |
| 671  | Fe2NiSn | Fe | Ni | Sn | l21 | 2397.964 | 0.152  | 5.995 | 32.593 | 0.646 | 2.213  | 2.213  | 0.446  | -0.157 | 4.715 | 30 |
| 2662 | V2CdAl  | V  | Cd | Al | xa  | -0.132   | 0.291  | 6.345 | 32.515 | 0.206 | 1.428  | -1.198 | 0.018  | -0.003 | 0.245 | 15 |
| 2149 | Sc2CoGa | Sc | Co | Ga | l21 | 0.509    | -0.446 | 6.493 | 32.379 | 0.056 | -0.070 | -0.070 | 0.533  | 0.014  | 0.407 | 18 |
| 1548 | Pd2WSb  | Pd | W  | Sb | xa  | -0.873   | 0.152  | 6.462 | 32.370 | 0.002 | 0.000  | 0.000  | 0.000  | 0.000  | 0.000 | 31 |
| 2760 | V2MoSn  | V  | Mo | Sn | l21 | 0.135    | 0.067  | 6.332 | 32.233 | 0.466 | 1.041  | 1.041  | -0.391 | 0.008  | 1.699 | 20 |
| 1476 | Pd2PtB  | Pd | Pt | B  | xa  | -0.353   | 0.436  | 5.988 | 32.014 | 0.000 | 0.000  | 0.000  | 0.000  | 0.000  | 0.000 | 33 |
| 400  | Cr2NiBi | Cr | Ni | Bi | xa  | -0.523   | 0.454  | 6.353 | 31.996 | 0.072 | 3.295  | -2.992 | 0.077  | -0.011 | 0.369 | 27 |
| 1673 | Rh2IrAs | Rh | Ir | As | xa  | -0.208   | 0.171  | 6.174 | 31.922 | 0.000 | 0.000  | 0.000  | 0.000  | 0.000  | 0.000 | 32 |
| 132  | Co2NbSn | Co | Nb | Sn | l21 | 1.283    | -0.107 | 6.172 | 31.804 | 0.655 | 0.878  | 0.878  | 0.026  | 0.008  | 1.790 | 27 |
| 2147 | Sc2CoB  | Sc | Co | B  | l21 | 0.811    | -0.121 | 6.110 | 31.702 | 0.083 | -0.034 | -0.034 | 0.280  | 0.024  | 0.236 | 18 |
| 2587 | Ti2VB   | Ti | V  | B  | l21 | 0.488    | 0.092  | 5.899 | 31.589 | 0.078 | 0.002  | 0.002  | 0.049  | 0.000  | 0.053 | 16 |
| 2352 | Sc2YSi  | Sc | Y  | Si | xa  | -0.213   | -0.129 | 7.023 | 31.420 | 0.004 | 0.000  | 0.000  | 0.000  | 0.000  | 0.000 | 13 |
| 394  | Cr2NbSb | Cr | Nb | Sb | l21 | 0.780    | 0.119  | 6.260 | 31.396 | 0.986 | 1.226  | 1.226  | -0.477 | -0.036 | 1.939 | 22 |
| 461  | Cr2ScSi | Cr | Sc | Si | xa  | -0.061   | -0.042 | 6.033 | 31.273 | 0.116 | -0.409 | 0.450  | -0.036 | -0.002 | 0.003 | 19 |
| 2513 | Ti2NiGe | Ti | Ni | Ge | l21 | 0.838    | -0.400 | 6.164 | 31.172 | 0.062 | 0.240  | 0.240  | 0.205  | 0.001  | 0.686 | 22 |
| 1706 | Rh2NbAs | Rh | Nb | As | xa  | -0.383   | -0.225 | 6.265 | 31.135 | 0.011 | 0.001  | 0.004  | 0.001  | 0.000  | 0.006 | 28 |
| 761  | Fe2YAs  | Fe | Y  | As | l21 | 0.696    | 0.030  | 6.269 | 31.119 | 0.770 | 0.000  | 0.000  | 0.000  | 0.000  | 0.000 | 24 |
| 2851 | V2VB    | V  | V  | B  | xa  | 0.000    | 0.059  | 5.657 | 31.001 | 0.003 | -0.001 | -0.002 | 0.003  | 0.000  | 0.000 | 18 |
| 107  | Co2MnPb | Co | Mn | Pb | l21 | 1.193    | 0.217  | 6.081 | 30.947 | 0.648 | 0.943  | 0.943  | 3.298  | -0.127 | 5.057 | 29 |
| 1056 | Mn2ZrSn | Mn | Zr | Sn | l21 | 1.024    | -0.156 | 6.313 | 30.831 | 0.998 | 1.198  | 1.198  | -0.293 | -0.079 | 2.024 | 22 |

|      |         |    |    |    |     |        |        |       |        |       |        |        |        |        |       |    |
|------|---------|----|----|----|-----|--------|--------|-------|--------|-------|--------|--------|--------|--------|-------|----|
| 2131 | Sc2AuSb | Sc | Au | Sb | l21 | 1.995  | -0.685 | 7.001 | 30.752 | 0.356 | 0.333  | 0.333  | 0.030  | -0.006 | 0.690 | 12 |
| 931  | Mn2NiIn | Mn | Ni | In | xa  | -0.407 | -0.017 | 6.140 | 30.711 | 0.064 | 3.473  | -3.132 | 0.148  | -0.015 | 0.474 | 27 |
| 240  | Co2YSb  | Co | Y  | Sb | l21 | 1.661  | -0.269 | 6.428 | 30.663 | 1.000 | 0.000  | 0.000  | 0.006  | 0.000  | 0.006 | 26 |
| 390  | Cr2NbGa | Cr | Nb | Ga | l21 | 0.473  | 0.009  | 6.143 | 30.641 | 0.071 | 2.069  | 2.069  | -0.542 | -0.060 | 3.536 | 20 |
| 2879 | V2YSb   | V  | Y  | Sb | xa  | -0.342 | 0.080  | 6.816 | 30.553 | 0.179 | 0.000  | 0.000  | 0.006  | 0.000  | 0.006 | 18 |
| 2315 | Sc2TiGe | Sc | Ti | Ge | l21 | 0.366  | -0.254 | 6.766 | 30.487 | 0.169 | 0.354  | 0.354  | 1.626  | -0.054 | 2.280 | 14 |
| 2624 | Ti2ZnIn | Ti | Zn | In | l21 | 0.761  | -0.084 | 6.551 | 30.452 | 0.160 | 0.155  | 0.155  | -0.001 | -0.001 | 0.308 | 13 |
| 2727 | V2HfSn  | V  | Hf | Sn | l21 | 0.002  | 0.059  | 6.488 | 30.391 | 0.012 | 0.027  | 0.027  | -0.017 | 0.000  | 0.037 | 18 |
| 1354 | Pd2CoAs | Pd | Co | As | xa  | -0.087 | -0.008 | 6.137 | 30.277 | 0.699 | 0.093  | 0.060  | 1.580  | 0.000  | 1.733 | 34 |
| 996  | Mn2TiGe | Mn | Ti | Ge | l21 | 0.964  | -0.401 | 5.871 | 29.963 | 0.912 | 1.218  | 1.218  | -0.431 | -0.044 | 1.961 | 22 |
| 663  | Fe2NiB  | Fe | Ni | B  | l21 | 0.240  | 0.203  | 5.356 | 29.924 | 0.703 | 1.819  | 1.819  | 0.590  | -0.123 | 4.105 | 29 |
| 2842 | V2TiGa  | V  | Ti | Ga | xa  | -0.516 | -0.157 | 6.153 | 29.810 | 0.155 | -0.302 | 0.743  | -0.240 | -0.002 | 0.199 | 17 |
| 271  | Cr2AgIn | Cr | Ag | In | xa  | -0.423 | 0.334  | 6.517 | 29.582 | 0.075 | 3.444  | -3.357 | 0.043  | -0.067 | 0.063 | 16 |
| 1694 | Rh2MoAl | Rh | Mo | Al | l21 | 0.475  | -0.291 | 6.162 | 29.548 | 0.000 | 0.002  | 0.002  | 0.002  | 0.000  | 0.006 | 27 |
| 2176 | Sc2CuSi | Sc | Cu | Si | l21 | 2.126  | -0.495 | 6.517 | 29.495 | 0.000 | 0.000  | 0.000  | 0.000  | 0.000  | 0.000 | 11 |
| 2564 | Ti2ScAs | Ti | Sc | As | xa  | -0.412 | -0.237 | 6.507 | 29.366 | 0.207 | 1.040  | 0.313  | 0.059  | -0.026 | 1.386 | 16 |
| 2052 | Ru2TiIn | Ru | Ti | In | l21 | 1.823  | -0.331 | 6.313 | 29.326 | 0.001 | 0.000  | 0.000  | 0.000  | 0.000  | 0.000 | 23 |
| 1009 | Mn2VPb  | Mn | V  | Pb | l21 | 0.067  | 0.330  | 6.106 | 29.247 | 0.937 | 0.917  | 0.917  | -0.754 | -0.023 | 1.057 | 23 |
| 1433 | Pd2MoBi | Pd | Mo | Bi | xa  | -0.310 | 0.213  | 6.574 | 29.150 | 0.012 | 0.003  | 0.000  | 0.032  | -0.001 | 0.034 | 31 |
| 2706 | V2FeAl  | V  | Fe | Al | xa  | -0.663 | -0.197 | 5.918 | 29.113 | 0.347 | -0.211 | 1.749  | 1.142  | -0.015 | 2.665 | 21 |
| 446  | Cr2RuGe | Cr | Ru | Ge | xa  | -0.941 | -0.042 | 5.954 | 28.613 | 0.897 | 2.085  | -1.914 | -0.147 | 0.018  | 0.042 | 24 |
| 250  | Co2ZnPb | Co | Zn | Pb | l21 | 1.115  | 0.315  | 6.110 | 28.570 | 0.468 | 0.369  | 0.369  | -0.019 | -0.038 | 0.681 | 24 |
| 2710 | V2FeGa  | V  | Fe | Ga | xa  | -0.408 | -0.152 | 5.915 | 28.497 | 0.135 | -0.244 | 1.702  | 1.204  | -0.010 | 2.652 | 21 |
| 799  | Mn2AgIn | Mn | Ag | In | xa  | -0.217 | 0.117  | 6.460 | 28.497 | 0.162 | 3.667  | -3.460 | 0.013  | -0.011 | 0.209 | 18 |
| 1391 | Pd2FeGe | Pd | Fe | Ge | l21 | 0.118  | -0.167 | 6.154 | 28.470 | 0.285 | 0.086  | 0.086  | 3.055  | -0.010 | 3.217 | 32 |
| 1809 | Rh2WGe  | Rh | W  | Ge | xa  | -0.471 | 0.011  | 6.174 | 28.265 | 0.000 | 0.000  | 0.001  | 0.000  | 0.000  | 0.001 | 28 |
| 402  | Cr2NiGe | Cr | Ni | Ge | xa  | -0.528 | -0.001 | 5.814 | 28.073 | 0.172 | 2.369  | -1.101 | 0.592  | 0.000  | 1.860 | 26 |
| 1297 | Ni2YSi  | Ni | Y  | Si | l21 | 1.022  | -0.436 | 6.176 | 27.971 | 0.003 | 0.000  | 0.000  | 0.000  | 0.000  | 0.000 | 27 |
| 2894 | V2ZrAs  | V  | Zr | As | l21 | 0.058  | -0.067 | 6.236 | 27.947 | 0.198 | 0.158  | 0.158  | -0.015 | -0.003 | 0.298 | 19 |

|      |         |    |    |    |     |        |        |       |        |       |        |        |        |        |       |    |
|------|---------|----|----|----|-----|--------|--------|-------|--------|-------|--------|--------|--------|--------|-------|----|
| 2184 | Sc2FeIn | Sc | Fe | In | l21 | 0.463  | -0.181 | 6.769 | 27.923 | 0.300 | -0.262 | -0.262 | 1.793  | -0.087 | 1.182 | 17 |
| 2485 | Ti2MnSn | Ti | Mn | Sn | l21 | 0.193  | -0.160 | 6.434 | 27.918 | 0.086 | -0.553 | -0.553 | 2.062  | 0.015  | 0.971 | 19 |
| 392  | Cr2NbIn | Cr | Nb | In | l21 | 0.762  | 0.221  | 6.370 | 27.833 | 0.815 | 2.235  | 2.235  | -0.747 | -0.057 | 3.666 | 20 |
| 2608 | Ti2YAs  | Ti | Y  | As | xa  | -0.324 | -0.107 | 6.756 | 27.825 | 0.811 | 0.000  | 0.000  | 0.009  | 0.000  | 0.009 | 16 |
| 2171 | Sc2CuGa | Sc | Cu | Ga | l21 | 1.635  | -0.462 | 6.625 | 27.754 | 0.000 | 0.000  | 0.000  | 0.000  | 0.000  | 0.000 | 10 |
| 300  | Cr2CoB  | Cr | Co | B  | xa  | -0.486 | 0.168  | 5.383 | 27.711 | 0.126 | -0.066 | 0.090  | 0.026  | -0.001 | 0.049 | 24 |
| 1179 | Ni2NbAs | Ni | Nb | As | xa  | -0.554 | -0.153 | 6.035 | 27.697 | 0.000 | 0.000  | 0.000  | 0.000  | 0.000  | 0.000 | 30 |
| 951  | Mn2PtGa | Mn | Pt | Ga | xa  | -0.492 | -0.384 | 6.099 | 27.510 | 0.251 | 3.500  | -3.193 | 0.068  | 0.031  | 0.406 | 27 |
| 1409 | Pd2IrAs | Pd | Ir | As | xa  | -0.660 | 0.025  | 6.244 | 27.362 | 0.000 | 0.000  | 0.000  | 0.000  | 0.000  | 0.000 | 34 |
| 2306 | Sc2ScPb | Sc | Sc | Pb | l21 | 0.000  | -0.099 | 7.249 | 27.289 | 0.426 | 0.368  | 0.368  | 0.603  | -0.040 | 1.299 | 13 |
| 2536 | Ti2PtIn | Ti | Pt | In | xa  | -0.318 | -0.444 | 6.523 | 27.282 | 1.000 | 0.899  | 1.527  | 0.097  | 0.012  | 2.535 | 21 |
| 122  | Co2NbAl | Co | Nb | Al | l21 | 1.441  | -0.408 | 5.965 | 27.278 | 1.000 | 1.033  | 1.033  | -0.013 | 0.003  | 2.056 | 26 |
| 371  | Cr2MnPb | Cr | Mn | Pb | l21 | 0.032  | 0.492  | 6.302 | 27.262 | 0.903 | 2.180  | 2.180  | -3.416 | -0.067 | 0.877 | 23 |
| 912  | Mn2MoSi | Mn | Mo | Si | l21 | 0.564  | -0.352 | 5.772 | 27.260 | 0.000 | 0.001  | 0.001  | 0.000  | 0.000  | 0.002 | 24 |
| 1150 | Ni2IrGe | Ni | Ir | Ge | xa  | -0.657 | -0.129 | 5.873 | 27.227 | 0.000 | 0.000  | 0.000  | 0.000  | 0.000  | 0.000 | 33 |
| 2321 | Sc2VAl  | Sc | V  | Al | l21 | 0.453  | -0.139 | 6.764 | 27.173 | 0.280 | 0.163  | 0.163  | 2.298  | -0.041 | 2.583 | 14 |
| 1756 | Rh2RhPb | Rh | Rh | Pb | l21 | 0.000  | 0.171  | 6.382 | 27.019 | 0.052 | 0.028  | 0.028  | 0.036  | -0.001 | 0.091 | 31 |
| 2333 | Sc2WAs  | Sc | W  | As | l21 | 0.839  | -0.097 | 6.613 | 26.901 | 0.000 | 0.000  | 0.000  | 0.001  | 0.000  | 0.001 | 17 |
| 2763 | V2NbB   | V  | Nb | B  | xa  | -0.020 | 0.229  | 5.896 | 26.809 | 0.168 | -0.149 | 0.443  | -0.248 | -0.004 | 0.042 | 18 |
| 1147 | Ni2IrB  | Ni | Ir | B  | xa  | -1.443 | 0.207  | 5.540 | 26.805 | 0.007 | 0.085  | 0.052  | 0.046  | -0.002 | 0.181 | 32 |
| 1807 | Rh2WBi  | Rh | W  | Bi | xa  | -0.279 | 0.448  | 6.480 | 26.804 | 0.000 | 0.000  | 0.000  | 0.000  | 0.000  | 0.000 | 29 |
| 2166 | Sc2CrSn | Sc | Cr | Sn | l21 | 0.173  | -0.143 | 6.933 | 26.729 | 0.645 | -0.212 | -0.212 | 3.445  | -0.063 | 2.958 | 16 |
| 578  | Fe2CrGe | Fe | Cr | Ge | xa  | -0.040 | -0.030 | 5.765 | 26.697 | 0.477 | 2.501  | 1.111  | -1.705 | 0.018  | 1.925 | 26 |
| 2309 | Sc2ScSn | Sc | Sc | Sn | l21 | 0.000  | -0.275 | 7.147 | 26.594 | 0.246 | 0.324  | 0.324  | 0.550  | -0.038 | 1.160 | 13 |
| 2575 | Ti2TiAs | Ti | Ti | As | l21 | 0.000  | -0.265 | 6.308 | 26.558 | 0.026 | 0.007  | 0.007  | 0.021  | -0.001 | 0.034 | 17 |
| 1530 | Pd2VAs  | Pd | V  | As | xa  | -0.333 | -0.203 | 6.204 | 26.556 | 0.067 | 0.005  | 0.000  | 0.212  | 0.000  | 0.217 | 30 |
| 2704 | V2CuSi  | V  | Cu | Si | l21 | 0.443  | -0.089 | 5.889 | 26.491 | 0.000 | 0.000  | 0.000  | 0.000  | 0.000  | 0.000 | 15 |
| 2519 | Ti2PdAl | Ti | Pd | Al | xa  | -0.350 | -0.435 | 6.343 | 26.451 | 1.000 | 0.936  | 1.492  | 0.092  | -0.018 | 2.502 | 21 |
| 1234 | Ni2RuAs | Ni | Ru | As | xa  | -1.018 | -0.003 | 5.845 | 26.388 | 0.002 | 0.001  | 0.000  | 0.000  | 0.000  | 0.001 | 33 |

|      |         |    |    |    |     |        |        |       |        |       |        |        |        |        |       |    |
|------|---------|----|----|----|-----|--------|--------|-------|--------|-------|--------|--------|--------|--------|-------|----|
| 1286 | Ni2WSi  | Ni | W  | Si | xa  | -0.401 | -0.078 | 5.839 | 26.382 | 0.000 | 0.000  | 0.000  | 0.000  | 0.000  | 0.000 | 30 |
| 1960 | Ru2MoB  | Ru | Mo | B  | l21 | 0.826  | 0.367  | 5.880 | 26.363 | 0.116 | 0.002  | 0.002  | 0.037  | 0.001  | 0.042 | 25 |
| 2337 | Sc2WGe  | Sc | W  | Ge | l21 | 0.632  | -0.079 | 6.633 | 26.339 | 0.002 | 0.000  | 0.000  | 0.001  | 0.000  | 0.001 | 16 |
| 465  | Cr2TiB  | Cr | Ti | B  | xa  | -0.716 | 0.099  | 5.618 | 26.223 | 0.003 | 0.008  | -0.009 | 0.001  | 0.000  | 0.000 | 19 |
| 670  | Fe2NiSi | Fe | Ni | Si | xa  | -0.301 | -0.295 | 5.629 | 26.186 | 0.615 | 2.585  | 1.731  | 0.425  | -0.014 | 4.727 | 30 |
| 2067 | Ru2VSn  | Ru | V  | Sn | l21 | 1.472  | -0.155 | 6.228 | 26.179 | 0.047 | 0.019  | 0.019  | 0.001  | -0.001 | 0.038 | 25 |
| 2370 | Sc2ZrGe | Sc | Zr | Ge | xa  | -0.059 | -0.189 | 6.868 | 26.111 | 0.008 | -0.001 | 0.000  | 0.001  | 0.000  | 0.000 | 14 |
| 1745 | Rh2PtPb | Rh | Pt | Pb | l21 | 0.415  | 0.059  | 6.425 | 26.107 | 0.000 | 0.002  | 0.002  | 0.002  | 0.000  | 0.006 | 32 |
| 2838 | V2TiAl  | V  | Ti | Al | xa  | -0.451 | -0.133 | 6.186 | 26.026 | 0.176 | -0.420 | 0.910  | -0.318 | -0.003 | 0.169 | 17 |
| 1274 | Ni2VSb  | Ni | V  | Sb | l21 | 0.215  | -0.045 | 6.052 | 25.945 | 0.576 | 0.029  | 0.029  | 1.491  | -0.034 | 1.515 | 30 |
| 2469 | Ti2IrGe | Ti | Ir | Ge | xa  | -0.080 | -0.501 | 6.255 | 25.901 | 0.134 | 0.665  | 1.532  | 0.117  | 0.006  | 2.320 | 21 |
| 1553 | Pd2YB   | Pd | Y  | B  | xa  | -0.114 | -0.014 | 6.376 | 25.834 | 0.000 | 0.000  | 0.000  | 0.000  | 0.000  | 0.000 | 26 |
| 2182 | Sc2FeGa | Sc | Fe | Ga | l21 | 0.662  | -0.330 | 6.500 | 25.792 | 0.086 | -0.176 | -0.176 | 1.182  | -0.046 | 0.784 | 17 |
| 439  | Cr2RhSi | Cr | Rh | Si | xa  | -1.096 | -0.268 | 5.860 | 25.751 | 0.978 | 2.214  | -1.402 | 0.184  | 0.006  | 1.002 | 25 |
| 904  | Mn2MoAs | Mn | Mo | As | xa  | -0.462 | -0.041 | 5.970 | 25.580 | 0.805 | 2.657  | -1.308 | -0.467 | 0.068  | 0.950 | 25 |
| 834  | Mn2CoSb | Mn | Co | Sb | xa  | -0.911 | 0.021  | 6.056 | 25.530 | 0.300 | 3.226  | -2.483 | 0.448  | 0.044  | 1.235 | 28 |
| 2369 | Sc2ZrGa | Sc | Zr | Ga | xa  | -0.034 | -0.137 | 6.933 | 25.493 | 0.001 | 0.000  | 0.000  | 0.000  | 0.000  | 0.000 | 13 |
| 2560 | Ti2RuSb | Ti | Ru | Sb | xa  | -0.429 | -0.319 | 6.429 | 25.485 | 0.362 | 0.564  | 1.483  | 0.159  | -0.005 | 2.201 | 21 |
| 810  | Mn2AuIn | Mn | Au | In | xa  | -0.140 | -0.012 | 6.477 | 25.438 | 0.064 | 3.662  | -3.572 | 0.009  | -0.011 | 0.088 | 18 |
| 108  | Co2MnSb | Co | Mn | Sb | l21 | 1.676  | -0.104 | 6.004 | 25.214 | 1.000 | 1.239  | 1.239  | 3.471  | 0.003  | 5.952 | 30 |
| 1890 | Ru2CoSi | Ru | Co | Si | l21 | 1.055  | -0.229 | 5.848 | 25.200 | 0.249 | 0.249  | 0.249  | 1.411  | 0.004  | 1.913 | 29 |
| 2011 | Ru2PtSi | Ru | Pt | Si | l21 | 0.827  | -0.064 | 6.074 | 25.171 | 0.055 | 0.036  | 0.036  | 0.017  | -0.001 | 0.088 | 30 |
| 2003 | Ru2PtAs | Ru | Pt | As | l21 | 0.937  | 0.165  | 6.174 | 24.984 | 0.003 | 0.001  | 0.001  | 0.000  | 0.000  | 0.002 | 31 |
| 253  | Co2ZnSn | Co | Zn | Sn | l21 | 1.215  | -0.015 | 5.993 | 24.794 | 0.533 | 0.266  | 0.266  | -0.014 | -0.027 | 0.491 | 24 |
| 2189 | Sc2HfAl | Sc | Hf | Al | xa  | -0.065 | -0.064 | 6.955 | 24.730 | 0.020 | 0.003  | 0.001  | 0.001  | 0.000  | 0.005 | 13 |
| 1442 | Pd2NbAs | Pd | Nb | As | xa  | -1.052 | -0.317 | 6.354 | 24.711 | 0.001 | 0.000  | 0.000  | 0.000  | 0.000  | 0.000 | 30 |
| 497  | Cr2YAs  | Cr | Y  | As | xa  | -0.529 | 0.130  | 6.709 | 24.691 | 0.541 | 0.000  | 0.000  | 0.009  | 0.000  | 0.009 | 20 |
| 1616 | Rh2CdSn | Rh | Cd | Sn | l21 | 1.459  | -0.326 | 6.444 | 24.637 | 0.469 | 0.059  | 0.059  | 0.000  | 0.003  | 0.121 | 24 |
| 2530 | Ti2PtAl | Ti | Pt | Al | xa  | -0.582 | -0.647 | 6.309 | 24.599 | 1.000 | 0.827  | 1.582  | 0.097  | -0.009 | 2.497 | 21 |

|      |         |    |    |    |     |        |        |       |        |       |        |        |        |        |       |    |
|------|---------|----|----|----|-----|--------|--------|-------|--------|-------|--------|--------|--------|--------|-------|----|
| 2441 | Ti2CuSn | Ti | Cu | Sn | l21 | 0.769  | -0.127 | 6.471 | 24.532 | 0.001 | 0.077  | 0.077  | 0.001  | 0.001  | 0.156 | 13 |
| 1296 | Ni2YSb  | Ni | Y  | Sb | l21 | 1.331  | -0.471 | 6.453 | 24.192 | 0.001 | 0.000  | 0.000  | 0.000  | 0.000  | 0.000 | 28 |
| 2435 | Ti2CuGa | Ti | Cu | Ga | l21 | 0.904  | -0.277 | 6.231 | 24.131 | 0.000 | 0.000  | 0.000  | 0.000  | 0.000  | 0.000 | 12 |
| 2380 | Ti2AgGa | Ti | Ag | Ga | l21 | 0.602  | -0.156 | 6.441 | 23.994 | 0.009 | 0.001  | 0.001  | 0.000  | 0.000  | 0.002 | 12 |
| 2748 | V2MnSi  | V  | Mn | Si | xa  | -0.465 | -0.393 | 5.818 | 23.879 | 0.244 | -0.348 | 1.440  | 1.169  | -0.028 | 2.233 | 21 |
| 2876 | V2YGe   | V  | Y  | Ge | xa  | -0.787 | 0.051  | 6.587 | 23.828 | 0.382 | 0.000  | 0.000  | 0.004  | 0.000  | 0.004 | 17 |
| 2882 | V2ZnAl  | V  | Zn | Al | xa  | -0.021 | 0.095  | 6.090 | 23.795 | 0.287 | 0.849  | -0.571 | 0.008  | -0.004 | 0.282 | 15 |
| 776  | Fe2ZnGe | Fe | Zn | Ge | l21 | 0.903  | 0.064  | 5.758 | 23.685 | 0.730 | 0.747  | 0.747  | -0.019 | -0.058 | 1.417 | 22 |
| 1004 | Mn2VB   | Mn | V  | B  | l21 | 0.766  | -0.169 | 5.435 | 23.663 | 0.869 | 1.186  | 1.186  | -0.476 | -0.042 | 1.854 | 22 |
| 938  | Mn2PdBi | Mn | Pd | Bi | xa  | -1.103 | 0.198  | 5.671 | 23.646 | 0.481 | 3.115  | -1.859 | 0.212  | 0.076  | 1.544 | 27 |
| 2141 | Sc2CdPb | Sc | Cd | Pb | l21 | 1.592  | -0.291 | 7.183 | 23.561 | 0.019 | 0.010  | 0.010  | 0.000  | -0.001 | 0.019 | 12 |
| 2346 | Sc2YBi  | Sc | Y  | Bi | xa  | -0.069 | -0.128 | 7.459 | 23.421 | 0.001 | 0.000  | 0.000  | 0.000  | 0.000  | 0.000 | 14 |
| 747  | Fe2VSi  | Fe | V  | Si | l21 | 0.729  | -0.481 | 5.612 | 23.380 | 0.784 | 0.490  | 0.490  | -0.113 | -0.009 | 0.858 | 25 |
| 1952 | Ru2MnGe | Ru | Mn | Ge | l21 | 1.770  | -0.276 | 5.997 | 23.326 | 0.963 | -0.023 | -0.023 | 2.996  | 0.015  | 2.965 | 27 |
| 2773 | V2NiAs  | V  | Ni | As | l21 | 0.612  | -0.153 | 5.908 | 23.192 | 0.005 | 0.001  | 0.001  | 0.000  | 0.000  | 0.002 | 25 |
| 316  | Cr2CrPb | Cr | Cr | Pb | l21 | 0.000  | 0.586  | 6.337 | 23.184 | 0.588 | 2.497  | 2.497  | -2.885 | -0.040 | 2.069 | 22 |
| 2806 | V2RhAs  | V  | Rh | As | xa  | -0.013 | -0.157 | 6.029 | 23.150 | 0.005 | -0.001 | 0.001  | 0.000  | 0.000  | 0.000 | 24 |
| 1981 | Ru2NiAs | Ru | Ni | As | l21 | 1.122  | 0.009  | 5.942 | 23.084 | 0.000 | 0.000  | 0.000  | 0.000  | 0.000  | 0.000 | 31 |
| 2348 | Sc2YGe  | Sc | Y  | Ge | xa  | -0.204 | -0.177 | 7.112 | 23.068 | 0.030 | 0.000  | 0.000  | 0.002  | 0.000  | 0.002 | 13 |
| 1849 | Ru2AgAs | Ru | Ag | As | l21 | 0.759  | 0.344  | 6.186 | 22.992 | 0.045 | 0.037  | 0.037  | 0.008  | -0.002 | 0.080 | 22 |
| 2848 | V2TiSn  | V  | Ti | Sn | xa  | -0.490 | -0.076 | 6.382 | 22.968 | 0.118 | -0.650 | 1.402  | -0.675 | 0.007  | 0.084 | 18 |
| 1167 | Ni2MoAl | Ni | Mo | Al | l21 | 0.355  | -0.194 | 5.896 | 22.968 | 0.000 | 0.000  | 0.000  | 0.000  | 0.000  | 0.000 | 29 |
| 1478 | Pd2PtGa | Pd | Pt | Ga | xa  | -0.165 | -0.424 | 6.227 | 22.682 | 0.000 | 0.000  | 0.000  | 0.000  | 0.000  | 0.000 | 33 |
| 155  | Co2PtAl | Co | Pt | Al | xa  | -0.266 | -0.323 | 5.897 | 22.606 | 0.836 | 1.612  | 1.526  | 0.191  | -0.011 | 3.318 | 31 |
| 2330 | Sc2VSi  | Sc | V  | Si | l21 | 0.306  | -0.196 | 6.587 | 22.497 | 0.523 | 0.112  | 0.112  | 2.198  | -0.050 | 2.372 | 15 |
| 507  | Cr2ZnAl | Cr | Zn | Al | xa  | -0.384 | 0.070  | 5.978 | 22.468 | 0.019 | 2.450  | -1.844 | 0.040  | -0.008 | 0.638 | 17 |
| 325  | Cr2CuGe | Cr | Cu | Ge | xa  | -0.152 | 0.188  | 5.926 | 22.383 | 0.061 | 2.590  | -2.015 | 0.090  | 0.000  | 0.665 | 17 |
| 2121 | Sc2AgSi | Sc | Ag | Si | l21 | 1.990  | -0.459 | 6.706 | 22.267 | 0.351 | 0.185  | 0.185  | 0.019  | -0.017 | 0.372 | 11 |
| 1679 | Rh2IrPb | Rh | Ir | Pb | l21 | 0.047  | 0.328  | 6.406 | 22.127 | 0.006 | 0.001  | 0.001  | 0.002  | 0.000  | 0.004 | 31 |



|      |         |    |    |    |     |        |        |       |        |       |        |        |        |        |       |    |
|------|---------|----|----|----|-----|--------|--------|-------|--------|-------|--------|--------|--------|--------|-------|----|
| 1675 | Rh2IrBi | Rh | Ir | Bi | l21 | 0.008  | 0.342  | 6.453 | 22.050 | 0.397 | 0.053  | 0.053  | 0.008  | 0.004  | 0.118 | 32 |
| 398  | Cr2NiAs | Cr | Ni | As | l21 | 0.026  | 0.102  | 5.767 | 21.929 | 0.124 | 0.613  | 0.613  | -0.043 | -0.020 | 1.163 | 27 |
| 162  | Co2PtPb | Co | Pt | Pb | l21 | 0.561  | 0.288  | 6.211 | 21.811 | 0.667 | 1.354  | 1.354  | 0.171  | -0.080 | 2.799 | 32 |
| 2236 | Sc2NbBi | Sc | Nb | Bi | l21 | 0.395  | -0.046 | 7.024 | 21.788 | 0.034 | 0.002  | 0.002  | 0.023  | 0.000  | 0.027 | 16 |
| 517  | Cr2ZnSn | Cr | Zn | Sn | xa  | -0.012 | 0.307  | 6.343 | 21.768 | 0.412 | 3.004  | -2.894 | 0.031  | -0.054 | 0.087 | 18 |
| 2605 | Ti2WSi  | Ti | W  | Si | l21 | 0.560  | -0.317 | 6.240 | 21.763 | 0.001 | 0.000  | 0.000  | 0.000  | 0.000  | 0.000 | 18 |
| 1386 | Pd2FeAl | Pd | Fe | Al | l21 | 0.515  | -0.452 | 6.110 | 21.753 | 0.585 | 0.074  | 0.074  | 3.024  | -0.016 | 3.156 | 31 |
| 1289 | Ni2YAs  | Ni | Y  | As | l21 | 0.555  | -0.402 | 6.268 | 21.691 | 0.001 | 0.000  | 0.000  | 0.000  | 0.000  | 0.000 | 28 |
| 2880 | V2YSi   | V  | Y  | Si | xa  | -0.614 | 0.047  | 6.503 | 21.689 | 0.451 | 0.000  | 0.000  | 0.005  | 0.000  | 0.005 | 17 |
| 1705 | Rh2NbAl | Rh | Nb | Al | l21 | 1.399  | -0.617 | 6.243 | 21.594 | 0.051 | 0.036  | 0.036  | 0.029  | 0.001  | 0.102 | 26 |
| 1806 | Rh2WB   | Rh | W  | B  | xa  | -0.422 | 0.447  | 5.925 | 21.482 | 0.000 | 0.000  | 0.000  | 0.000  | 0.000  | 0.000 | 27 |
| 2585 | Ti2VAl  | Ti | V  | Al | l21 | 0.333  | -0.169 | 6.325 | 21.467 | 0.550 | -0.024 | -0.024 | 1.234  | -0.017 | 1.169 | 16 |
| 2350 | Sc2YPb  | Sc | Y  | Pb | xa  | -0.095 | -0.092 | 7.439 | 21.388 | 0.199 | 0.000  | 0.000  | 0.002  | 0.000  | 0.002 | 13 |
| 2353 | Sc2YSn  | Sc | Y  | Sn | xa  | -0.085 | -0.252 | 7.332 | 21.365 | 0.285 | 0.000  | 0.000  | 0.001  | 0.000  | 0.001 | 13 |
| 1196 | Ni2NiPb | Ni | Ni | Pb | l21 | 0.008  | 0.185  | 6.018 | 21.344 | 0.002 | 0.001  | 0.001  | 0.001  | 0.000  | 0.003 | 34 |
| 401  | Cr2NiGa | Cr | Ni | Ga | xa  | -0.852 | -0.021 | 5.848 | 21.300 | 0.845 | 2.425  | -1.900 | 0.475  | -0.030 | 0.970 | 25 |
| 606  | Fe2HfAl | Fe | Hf | Al | l21 | 1.153  | -0.371 | 6.009 | 21.280 | 0.809 | 0.547  | 0.547  | -0.105 | -0.013 | 0.976 | 23 |
| 437  | Cr2RhPb | Cr | Rh | Pb | xa  | -0.724 | 0.293  | 6.375 | 21.265 | 0.571 | 3.241  | -2.710 | 0.282  | 0.001  | 0.814 | 25 |
| 1417 | Pd2IrSi | Pd | Ir | Si | xa  | -0.970 | -0.211 | 6.121 | 21.231 | 0.000 | 0.000  | 0.000  | 0.000  | 0.000  | 0.000 | 33 |
| 2007 | Ru2PtGe | Ru | Pt | Ge | l21 | 0.826  | 0.054  | 6.151 | 21.196 | 0.099 | 0.043  | 0.043  | 0.020  | -0.001 | 0.105 | 30 |
| 1545 | Pd2WGe  | Pd | W  | Ge | xa  | -0.892 | 0.069  | 6.259 | 20.750 | 0.002 | 0.000  | 0.000  | 0.000  | 0.000  | 0.000 | 30 |
| 965  | Mn2RhPb | Mn | Rh | Pb | xa  | -0.438 | 0.078  | 6.388 | 20.742 | 0.379 | 3.666  | -3.407 | 0.019  | 0.027  | 0.305 | 27 |
| 315  | Cr2CrIn | Cr | Cr | In | l21 | 0.000  | 0.337  | 6.232 | 20.729 | 0.740 | 2.625  | 2.625  | -2.455 | 0.024  | 2.819 | 21 |
| 2514 | Ti2NiIn | Ti | Ni | In | xa  | -0.086 | -0.106 | 6.400 | 20.518 | 1.000 | 0.999  | 1.412  | 0.167  | -0.001 | 2.577 | 21 |
| 175  | Co2RhSi | Co | Rh | Si | xa  | -0.503 | -0.257 | 5.752 | 20.378 | 0.726 | 1.561  | 1.340  | 0.445  | -0.008 | 3.338 | 31 |
| 377  | Cr2MoB  | Cr | Mo | B  | xa  | -0.124 | 0.295  | 5.654 | 20.284 | 0.000 | 0.000  | 0.000  | 0.000  | 0.000  | 0.000 | 21 |
| 2528 | Ti2PdSi | Ti | Pd | Si | l21 | 0.573  | -0.488 | 6.291 | 20.224 | 0.200 | 0.626  | 0.626  | 0.126  | -0.021 | 1.357 | 22 |
| 2120 | Sc2AgSb | Sc | Ag | Sb | l21 | 1.761  | -0.482 | 6.994 | 20.216 | 0.019 | 0.307  | 0.307  | 0.015  | -0.009 | 0.620 | 12 |
| 992  | Mn2TiAs | Mn | Ti | As | l21 | 0.890  | -0.388 | 5.817 | 20.072 | 0.725 | 0.596  | 0.596  | -0.228 | -0.020 | 0.944 | 23 |





|      |         |    |    |    |     |        |        |       |        |       |        |        |        |        |       |    |
|------|---------|----|----|----|-----|--------|--------|-------|--------|-------|--------|--------|--------|--------|-------|----|
| 1504 | Pd2RuSb | Pd | Ru | Sb | xa  | -0.908 | -0.108 | 6.363 | 16.151 | 0.001 | 0.000  | 0.000  | 0.000  | 0.000  | 0.000 | 33 |
| 907  | Mn2MoGa | Mn | Mo | Ga | l21 | 0.602  | -0.134 | 5.886 | 16.141 | 0.846 | 0.662  | 0.662  | -0.324 | -0.025 | 0.975 | 23 |
| 2497 | Ti2NbAl | Ti | Nb | Al | l21 | 0.461  | -0.224 | 6.466 | 16.111 | 0.000 | 0.001  | 0.001  | -0.001 | 0.000  | 0.001 | 16 |
| 1231 | Ni2RhSi | Ni | Rh | Si | xa  | -0.678 | -0.390 | 5.733 | 15.954 | 0.003 | 0.001  | 0.000  | 0.000  | 0.000  | 0.001 | 33 |
| 1758 | Rh2RhSi | Rh | Rh | Si | l21 | 0.000  | -0.188 | 6.038 | 15.865 | 0.000 | 0.000  | 0.000  | 0.000  | 0.000  | 0.000 | 31 |
| 1211 | Ni2PtAl | Ni | Pt | Al | xa  | -0.245 | -0.492 | 5.873 | 15.854 | 0.003 | 0.002  | 0.000  | 0.000  | 0.000  | 0.002 | 33 |
| 2069 | Ru2WAs  | Ru | W  | As | xa  | -0.184 | 0.335  | 6.181 | 15.830 | 0.029 | 0.013  | 0.002  | -0.001 | 0.001  | 0.015 | 27 |
| 843  | Mn2CrIn | Mn | Cr | In | l21 | 0.238  | 0.168  | 6.290 | 15.720 | 0.623 | 3.322  | 3.322  | -2.933 | -0.013 | 3.698 | 23 |
| 265  | Cr2AgAl | Cr | Ag | Al | xa  | -0.598 | 0.216  | 6.223 | 15.715 | 0.048 | 3.132  | -2.800 | 0.072  | -0.001 | 0.403 | 16 |
| 2752 | V2MoB   | V  | Mo | B  | l21 | 0.056  | 0.176  | 5.784 | 15.652 | 0.051 | 0.020  | 0.020  | -0.003 | -0.001 | 0.036 | 19 |
| 1710 | Rh2NbGe | Rh | Nb | Ge | l21 | 0.234  | -0.298 | 6.270 | 15.596 | 0.000 | 0.000  | 0.000  | 0.000  | 0.000  | 0.000 | 27 |
| 827  | Mn2CoAs | Mn | Co | As | xa  | -0.313 | -0.064 | 5.727 | 15.490 | 0.637 | 2.957  | -1.699 | 0.364  | 0.061  | 1.683 | 28 |
| 1899 | Ru2CrPb | Ru | Cr | Pb | l21 | 1.346  | 0.340  | 6.316 | 15.384 | 0.630 | -0.251 | -0.251 | 2.487  | -0.019 | 1.966 | 26 |
| 2524 | Ti2PdGe | Ti | Pd | Ge | l21 | 0.713  | -0.482 | 6.355 | 15.373 | 0.020 | 0.630  | 0.630  | 0.112  | -0.019 | 1.353 | 22 |
| 1202 | Ni2PdB  | Ni | Pd | B  | xa  | -0.472 | 0.269  | 5.553 | 15.361 | 0.002 | 0.000  | 0.001  | 0.000  | 0.000  | 0.001 | 33 |
| 1288 | Ni2YAl  | Ni | Y  | Al | l21 | 1.342  | -0.460 | 6.292 | 15.330 | 0.001 | 0.000  | 0.000  | 0.000  | 0.000  | 0.000 | 26 |
| 2204 | Sc2IrGa | Sc | Ir | Ga | l21 | 0.392  | -0.798 | 6.584 | 15.309 | 0.000 | 0.000  | 0.000  | 0.000  | 0.000  | 0.000 | 18 |
| 1661 | Rh2HfAl | Rh | Hf | Al | l21 | 2.407  | -1.007 | 6.292 | 15.300 | 0.098 | 0.027  | 0.027  | 0.001  | 0.001  | 0.056 | 25 |
| 313  | Cr2CrGa | Cr | Cr | Ga | xa  | -0.001 | 0.030  | 5.908 | 15.294 | 0.074 | -1.662 | 2.188  | 2.188  | 0.001  | 2.715 | 21 |
| 2832 | V2ScGe  | V  | Sc | Ge | xa  | -0.870 | -0.144 | 6.311 | 15.205 | 0.580 | -1.007 | 1.570  | -0.142 | -0.006 | 0.415 | 17 |
| 2604 | Ti2WSb  | Ti | W  | Sb | l21 | 0.430  | -0.064 | 6.491 | 15.096 | 0.000 | 0.002  | 0.002  | -0.001 | 0.000  | 0.003 | 19 |
| 456  | Cr2ScGa | Cr | Sc | Ga | xa  | -0.822 | -0.058 | 6.311 | 15.094 | 1.000 | -2.690 | 2.894  | -0.217 | 0.022  | 0.009 | 18 |
| 1434 | Pd2MoGa | Pd | Mo | Ga | xa  | -0.348 | -0.122 | 6.231 | 15.078 | 0.001 | 0.000  | 0.000  | 0.001  | 0.000  | 0.001 | 29 |
| 1164 | Ni2MnSb | Ni | Mn | Sb | l21 | 0.464  | -0.146 | 6.041 | 15.076 | 0.067 | 0.157  | 0.157  | 3.571  | -0.021 | 3.864 | 32 |
| 1348 | Pd2CdIn | Pd | Cd | In | l21 | 0.736  | -0.497 | 6.554 | 15.052 | 0.000 | 0.000  | 0.000  | 0.000  | 0.000  | 0.000 | 25 |
| 2287 | Sc2RhSn | Sc | Rh | Sn | l21 | 0.456  | -0.682 | 6.812 | 14.961 | 0.001 | 0.000  | 0.000  | 0.000  | 0.000  | 0.000 | 19 |
| 2238 | Sc2NbGe | Sc | Nb | Ge | l21 | 0.298  | -0.170 | 6.743 | 14.804 | 0.017 | 0.006  | 0.006  | 0.068  | -0.002 | 0.078 | 15 |
| 241  | Co2YSi  | Co | Y  | Si | l21 | 1.333  | -0.285 | 6.109 | 14.779 | 0.995 | 0.000  | 0.000  | 0.005  | 0.000  | 0.005 | 25 |
| 2424 | Ti2CrGa | Ti | Cr | Ga | l21 | 0.297  | -0.223 | 6.183 | 14.775 | 0.000 | 0.000  | 0.000  | 0.001  | 0.000  | 0.001 | 17 |





|      |         |    |    |    |     |        |        |       |        |       |        |        |        |        |       |    |
|------|---------|----|----|----|-----|--------|--------|-------|--------|-------|--------|--------|--------|--------|-------|----|
| 2013 | Ru2RhAl | Ru | Rh | Al | l21 | 0.047  | -0.090 | 6.071 | 12.327 | 0.514 | 0.020  | 0.020  | 0.107  | 0.002  | 0.149 | 28 |
| 1206 | Ni2PdIn | Ni | Pd | In | l21 | 0.059  | -0.159 | 6.086 | 12.319 | 0.002 | 0.000  | 0.000  | 0.000  | 0.000  | 0.000 | 33 |
| 1463 | Pd2PdAl | Pd | Pd | Al | xa  | 0.000  | -0.579 | 6.202 | 12.279 | 0.000 | 0.000  | 0.000  | 0.000  | 0.000  | 0.000 | 33 |
| 1834 | Rh2ZnSb | Rh | Zn | Sb | l21 | 1.341  | -0.344 | 6.297 | 12.245 | 0.005 | 0.001  | 0.001  | 0.000  | 0.000  | 0.002 | 25 |
| 2320 | Sc2TiSn | Sc | Ti | Sn | l21 | 0.351  | -0.267 | 7.005 | 12.142 | 0.101 | 0.357  | 0.357  | 1.612  | -0.075 | 2.251 | 14 |
| 1471 | Pd2PdSb | Pd | Pd | Sb | l21 | 0.000  | -0.363 | 6.425 | 12.085 | 0.000 | 0.000  | 0.000  | 0.000  | 0.000  | 0.000 | 35 |
| 2361 | Sc2ZnPb | Sc | Zn | Pb | l21 | 1.747  | -0.300 | 7.019 | 12.030 | 0.010 | 0.003  | 0.003  | 0.000  | 0.000  | 0.006 | 12 |
| 1596 | Rh2AuAs | Rh | Au | As | l21 | 0.707  | 0.019  | 6.284 | 11.971 | 0.008 | 0.001  | 0.001  | 0.000  | 0.000  | 0.002 | 24 |
| 2222 | Sc2MoAl | Sc | Mo | Al | l21 | 0.380  | -0.098 | 6.706 | 11.956 | 0.000 | 0.000  | 0.000  | 0.001  | 0.000  | 0.001 | 15 |
| 114  | Co2MoBi | Co | Mo | Bi | l21 | 0.036  | 0.649  | 6.206 | 11.912 | 0.021 | 0.016  | 0.016  | 0.006  | 0.000  | 0.038 | 29 |
| 1229 | Ni2RhPb | Ni | Rh | Pb | xa  | -0.097 | 0.157  | 6.163 | 11.912 | 0.003 | 0.004  | 0.000  | 0.000  | 0.000  | 0.004 | 33 |
| 2603 | Ti2WPb  | Ti | W  | Pb | l21 | 0.906  | 0.151  | 6.585 | 11.898 | 0.000 | 0.000  | 0.000  | 0.001  | 0.000  | 0.001 | 18 |
| 1663 | Rh2HfB  | Rh | Hf | B  | l21 | 1.218  | -0.219 | 6.045 | 11.869 | 0.366 | 0.047  | 0.047  | -0.001 | 0.011  | 0.104 | 25 |
| 2170 | Sc2CuBi | Sc | Cu | Bi | l21 | 1.637  | -0.266 | 6.948 | 11.828 | 0.033 | 0.015  | 0.015  | 0.000  | -0.001 | 0.029 | 12 |
| 2861 | V2WAs   | V  | W  | As | l21 | 0.150  | 0.067  | 6.092 | 11.826 | 0.000 | 0.001  | 0.001  | 0.000  | 0.000  | 0.002 | 21 |
| 2542 | Ti2RhAs | Ti | Rh | As | l21 | 0.661  | -0.541 | 6.277 | 11.822 | 0.012 | 0.068  | 0.068  | 0.021  | 0.002  | 0.159 | 22 |
| 1526 | Pd2TiSb | Pd | Ti | Sb | l21 | 0.048  | -0.478 | 6.494 | 11.775 | 0.031 | 0.000  | 0.000  | 0.012  | 0.000  | 0.012 | 29 |
| 964  | Mn2RhIn | Mn | Rh | In | xa  | -0.367 | -0.153 | 6.271 | 11.755 | 0.016 | 3.651  | -3.171 | 0.222  | 0.046  | 0.748 | 26 |
| 2622 | Ti2ZnGa | Ti | Zn | Ga | l21 | 1.216  | -0.285 | 6.310 | 11.751 | 0.002 | 0.004  | 0.004  | 0.000  | 0.000  | 0.008 | 13 |
| 2144 | Sc2CdSn | Sc | Cd | Sn | l21 | 1.701  | -0.431 | 7.088 | 11.709 | 0.006 | 0.002  | 0.002  | 0.000  | 0.000  | 0.004 | 12 |
| 1802 | Rh2VSi  | Rh | V  | Si | l21 | 0.610  | -0.431 | 5.988 | 11.690 | 0.001 | 0.000  | 0.000  | 0.001  | 0.000  | 0.001 | 27 |
| 11   | Co2AgSn | Co | Ag | Sn | l21 | 0.600  | 0.222  | 6.131 | 11.683 | 0.468 | 0.128  | 0.128  | -0.005 | -0.020 | 0.231 | 23 |
| 39   | Co2CoGe | Co | Co | Ge | l21 | 0.000  | -0.048 | 5.685 | 11.647 | 0.773 | 1.266  | 1.266  | 1.542  | -0.030 | 4.044 | 31 |
| 2146 | Sc2CoAs | Sc | Co | As | l21 | 1.636  | -0.560 | 6.468 | 11.643 | 0.020 | -0.001 | -0.001 | 0.005  | 0.000  | 0.003 | 20 |
| 2666 | V2CdGa  | V  | Cd | Ga | l21 | 0.117  | 0.310  | 6.336 | 11.583 | 0.312 | 1.224  | 1.224  | 0.006  | -0.027 | 2.427 | 15 |
| 1907 | Ru2CuGa | Ru | Cu | Ga | l21 | 0.144  | 0.056  | 5.981 | 11.531 | 0.000 | 0.000  | 0.000  | 0.000  | 0.000  | 0.000 | 20 |
| 1401 | Pd2HfGa | Pd | Hf | Ga | l21 | 0.735  | -0.740 | 6.412 | 11.497 | 0.000 | 0.000  | 0.000  | 0.000  | 0.000  | 0.000 | 27 |
| 902  | Mn2MnSn | Mn | Mn | Sn | xa  | 0.000  | 0.045  | 6.026 | 11.468 | 0.998 | 3.119  | -1.114 | -1.107 | 0.042  | 0.940 | 25 |
| 2414 | Ti2CoGe | Ti | Co | Ge | l21 | 0.375  | -0.362 | 6.139 | 11.445 | 0.017 | 0.391  | 0.391  | 1.275  | 0.056  | 2.113 | 21 |

|      |         |    |    |    |     |        |        |       |        |       |        |        |        |        |       |    |
|------|---------|----|----|----|-----|--------|--------|-------|--------|-------|--------|--------|--------|--------|-------|----|
| 1416 | Pd2IrSb | Pd | Ir | Sb | xa  | -0.705 | -0.122 | 6.397 | 11.396 | 0.001 | 0.000  | 0.000  | 0.000  | 0.000  | 0.000 | 34 |
| 911  | Mn2MoSb | Mn | Mo | Sb | xa  | -0.220 | 0.123  | 6.175 | 11.356 | 0.947 | 2.874  | -1.480 | -0.495 | 0.054  | 0.953 | 25 |
| 1535 | Pd2VIn  | Pd | V  | In | l21 | 0.376  | -0.228 | 6.374 | 11.308 | 0.007 | 0.000  | 0.000  | 0.013  | 0.000  | 0.013 | 28 |
| 2364 | Sc2ZnSn | Sc | Zn | Sn | l21 | 1.838  | -0.460 | 6.924 | 11.292 | 0.002 | 0.000  | 0.000  | 0.000  | 0.000  | 0.000 | 12 |
| 1237 | Ni2RuGa | Ni | Ru | Ga | xa  | -0.362 | -0.099 | 5.831 | 11.262 | 0.001 | 0.001  | 0.001  | 0.001  | 0.000  | 0.003 | 31 |
| 2845 | V2TiPb  | V  | Ti | Pb | xa  | -0.498 | 0.217  | 6.468 | 11.237 | 0.053 | -0.734 | 1.536  | -0.724 | 0.011  | 0.089 | 18 |
| 1817 | Rh2YB   | Rh | Y  | B  | l21 | 1.048  | -0.040 | 6.181 | 11.187 | 0.002 | 0.000  | 0.000  | 0.000  | 0.000  | 0.000 | 24 |
| 935  | Mn2NiSn | Mn | Ni | Sn | xa  | -0.523 | -0.076 | 6.125 | 11.137 | 0.387 | 3.364  | -2.942 | 0.105  | 0.009  | 0.536 | 28 |
| 1261 | Ni2TiIn | Ni | Ti | In | l21 | 0.985  | -0.356 | 6.115 | 11.130 | 0.000 | 0.000  | 0.000  | 0.000  | 0.000  | 0.000 | 27 |
| 2098 | Ru2ZnSb | Ru | Zn | Sb | l21 | 1.818  | -0.077 | 6.237 | 11.028 | 0.000 | 0.000  | 0.000  | 0.000  | 0.000  | 0.000 | 23 |
| 1785 | Rh2TiBi | Rh | Ti | Bi | l21 | 0.650  | -0.250 | 6.501 | 11.004 | 0.000 | 0.000  | 0.000  | 0.000  | 0.000  | 0.000 | 27 |
| 1842 | Rh2ZrGe | Rh | Zr | Ge | l21 | 1.168  | -0.687 | 6.347 | 10.964 | 0.001 | 0.000  | 0.000  | 0.000  | 0.000  | 0.000 | 26 |
| 222  | Co2WAs  | Co | W  | As | xa  | -0.587 | 0.231  | 5.900 | 10.963 | 0.000 | 0.000  | 0.000  | 0.000  | 0.000  | 0.000 | 29 |
| 1466 | Pd2PdBi | Pd | Pd | Bi | l21 | 0.000  | -0.227 | 6.576 | 10.961 | 0.000 | 0.000  | 0.000  | 0.000  | 0.000  | 0.000 | 35 |
| 1487 | Pd2RhB  | Pd | Rh | B  | xa  | -0.589 | 0.429  | 5.927 | 10.956 | 0.002 | 0.000  | 0.000  | 0.000  | 0.000  | 0.000 | 32 |
| 2573 | Ti2ScSn | Ti | Sc | Sn | xa  | -0.312 | -0.190 | 6.797 | 10.899 | 0.678 | 1.244  | 0.504  | 0.112  | -0.067 | 1.793 | 15 |
| 2242 | Sc2NbSi | Sc | Nb | Si | l21 | 0.143  | -0.142 | 6.681 | 10.897 | 0.015 | 0.002  | 0.002  | 0.030  | -0.001 | 0.033 | 15 |
| 1524 | Pd2TiIn | Pd | Ti | In | l21 | 0.757  | -0.592 | 6.447 | 10.759 | 0.000 | 0.000  | 0.000  | 0.000  | 0.000  | 0.000 | 27 |
| 934  | Mn2NiSi | Mn | Ni | Si | xa  | -0.610 | -0.349 | 5.679 | 10.682 | 0.354 | 2.744  | -1.751 | 0.048  | 0.020  | 1.061 | 28 |
| 1994 | Ru2PdBi | Ru | Pd | Bi | l21 | 0.399  | 0.396  | 6.424 | 10.607 | 0.001 | 0.000  | 0.000  | 0.000  | 0.000  | 0.000 | 31 |
| 2110 | Ru2ZrSi | Ru | Zr | Si | l21 | 2.581  | -0.715 | 6.205 | 10.600 | 0.001 | 0.000  | 0.000  | 0.000  | 0.000  | 0.000 | 24 |
| 2543 | Ti2RhB  | Ti | Rh | B  | l21 | 0.135  | -0.166 | 5.979 | 10.569 | 0.000 | 0.000  | 0.000  | 0.000  | 0.000  | 0.000 | 20 |
| 2363 | Sc2ZnSi | Sc | Zn | Si | l21 | 2.271  | -0.490 | 6.598 | 10.553 | 0.000 | 0.000  | 0.000  | 0.000  | 0.000  | 0.000 | 12 |
| 2045 | Ru2ScSn | Ru | Sc | Sn | l21 | 1.862  | -0.470 | 6.419 | 10.499 | 0.000 | 0.000  | 0.000  | 0.000  | 0.000  | 0.000 | 23 |
| 1715 | Rh2NbSn | Rh | Nb | Sn | l21 | 0.753  | -0.333 | 6.441 | 10.403 | 0.002 | 0.000  | 0.000  | 0.000  | 0.000  | 0.000 | 27 |
| 1456 | Pd2NiGa | Pd | Ni | Ga | l21 | 0.356  | -0.409 | 6.036 | 10.301 | 0.001 | 0.000  | 0.000  | 0.000  | 0.000  | 0.000 | 33 |
| 1788 | Rh2TiIn | Rh | Ti | In | l21 | 1.744  | -0.657 | 6.331 | 10.294 | 0.000 | 0.000  | 0.000  | 0.000  | 0.000  | 0.000 | 25 |
| 1482 | Pd2PtSb | Pd | Pt | Sb | xa  | -0.143 | -0.294 | 6.446 | 10.287 | 0.000 | 0.000  | 0.000  | 0.000  | 0.000  | 0.000 | 35 |
| 2601 | Ti2WGe  | Ti | W  | Ge | l21 | 0.726  | -0.244 | 6.308 | 10.219 | 0.001 | 0.000  | 0.000  | 0.001  | 0.000  | 0.001 | 18 |



|      |         |    |    |    |     |        |        |       |        |       |        |        |        |        |       |    |
|------|---------|----|----|----|-----|--------|--------|-------|--------|-------|--------|--------|--------|--------|-------|----|
| 10   | Co2AgSi | Co | Ag | Si | l21 | 0.757  | 0.108  | 5.818 | 10.197 | 0.443 | 0.125  | 0.125  | -0.005 | -0.008 | 0.237 | 23 |
| 2705 | V2CuSn  | V  | Cu | Sn | xa  | -0.077 | 0.249  | 6.257 | 10.148 | 0.072 | 1.156  | -0.967 | 0.071  | -0.023 | 0.237 | 15 |
| 2437 | Ti2CuIn | Ti | Cu | In | l21 | 0.378  | -0.041 | 6.480 | 10.136 | 0.003 | 0.000  | 0.000  | 0.000  | 0.000  | 0.000 | 12 |
| 223  | Co2WB   | Co | W  | B  | xa  | -0.438 | 0.294  | 5.563 | 10.106 | 0.668 | 0.590  | 0.042  | -0.081 | 0.026  | 0.577 | 27 |
| 1063 | Ni2AgIn | Ni | Ag | In | l21 | 0.360  | -0.007 | 6.165 | 10.082 | 0.002 | 0.001  | 0.001  | 0.000  | 0.000  | 0.002 | 24 |
| 1857 | Ru2AgSi | Ru | Ag | Si | l21 | 0.856  | 0.153  | 6.085 | 10.050 | 0.005 | 0.004  | 0.004  | 0.001  | 0.000  | 0.009 | 21 |
| 2301 | Sc2ScB  | Sc | Sc | B  | l21 | 0.000  | 0.473  | 6.572 | 10.027 | 0.463 | 0.304  | 0.304  | 0.551  | -0.027 | 1.132 | 12 |
| 2336 | Sc2WGa  | Sc | W  | Ga | l21 | 0.586  | -0.015 | 6.671 | 10.004 | 0.001 | 0.000  | 0.000  | 0.001  | 0.000  | 0.001 | 15 |
| 1219 | Ni2PtSb | Ni | Pt | Sb | l21 | 0.216  | -0.122 | 6.113 | 9.994  | 0.000 | 0.000  | 0.000  | 0.000  | 0.000  | 0.000 | 35 |
| 303  | Cr2CoGe | Cr | Co | Ge | xa  | -0.696 | -0.009 | 5.785 | 9.973  | 0.910 | 1.999  | -1.527 | 0.603  | -0.022 | 1.053 | 25 |
| 1168 | Ni2MoAs | Ni | Mo | As | xa  | -1.059 | 0.001  | 5.927 | 9.842  | 0.000 | 0.000  | 0.000  | 0.000  | 0.000  | 0.000 | 31 |
| 1449 | Pd2NbSb | Pd | Nb | Sb | xa  | -0.493 | -0.259 | 6.544 | 9.839  | 0.001 | 0.000  | 0.000  | 0.000  | 0.000  | 0.000 | 30 |
| 1070 | Ni2AuB  | Ni | Au | B  | xa  | -0.121 | 0.510  | 5.671 | 9.811  | 0.001 | 0.000  | 0.000  | 0.000  | 0.000  | 0.000 | 24 |
| 1454 | Pd2NiB  | Pd | Ni | B  | l21 | 0.712  | 0.272  | 5.739 | 9.809  | 0.001 | 0.000  | 0.000  | 0.000  | 0.000  | 0.000 | 33 |
| 2388 | Ti2AuAs | Ti | Au | As | l21 | 1.878  | -0.418 | 6.443 | 9.775  | 0.000 | 0.000  | 0.000  | 0.000  | 0.000  | 0.000 | 14 |
| 2597 | Ti2WAs  | Ti | W  | As | l21 | 0.511  | -0.141 | 6.301 | 9.771  | 0.003 | 0.001  | 0.001  | -0.001 | 0.000  | 0.001 | 19 |
| 2494 | Ti2MoSb | Ti | Mo | Sb | l21 | 0.217  | -0.179 | 6.483 | 9.729  | 0.135 | 0.027  | 0.027  | -0.006 | 0.000  | 0.048 | 19 |
| 2208 | Sc2IrSb | Sc | Ir | Sb | l21 | 0.997  | -0.658 | 6.818 | 9.722  | 0.000 | 0.000  | 0.000  | 0.000  | 0.000  | 0.000 | 20 |
| 232  | Co2YAl  | Co | Y  | Al | l21 | 1.452  | -0.260 | 6.207 | 9.690  | 0.009 | 0.000  | 0.000  | 0.000  | 0.000  | 0.000 | 24 |
| 2207 | Sc2IrPb | Sc | Ir | Pb | l21 | 0.743  | -0.498 | 6.869 | 9.610  | 0.000 | 0.000  | 0.000  | 0.000  | 0.000  | 0.000 | 19 |
| 1803 | Rh2VSn  | Rh | V  | Sn | l21 | 0.619  | -0.253 | 6.280 | 9.508  | 0.003 | 0.000  | 0.000  | 0.002  | 0.000  | 0.002 | 27 |
| 2289 | Sc2RuAs | Sc | Ru | As | l21 | 0.859  | -0.634 | 6.559 | 9.507  | 0.001 | 0.000  | 0.000  | 0.000  | 0.000  | 0.000 | 19 |
| 1431 | Pd2MoAs | Pd | Mo | As | xa  | -1.193 | -0.062 | 6.260 | 9.502  | 0.001 | 0.000  | 0.000  | 0.001  | 0.000  | 0.001 | 31 |
| 2897 | V2ZrGa  | V  | Zr | Ga | xa  | -0.323 | -0.054 | 6.403 | 9.448  | 0.353 | -1.266 | 1.554  | -0.243 | 0.005  | 0.050 | 17 |
| 1873 | Ru2CdBi | Ru | Cd | Bi | l21 | 1.199  | 0.404  | 6.557 | 9.411  | 0.000 | 0.000  | 0.000  | 0.000  | 0.000  | 0.000 | 23 |
| 2620 | Ti2ZnB  | Ti | Zn | B  | l21 | 2.156  | 0.019  | 5.936 | 9.406  | 0.000 | 0.001  | 0.001  | 0.000  | 0.000  | 0.002 | 13 |
| 1719 | Rh2NiBi | Rh | Ni | Bi | l21 | 0.422  | 0.094  | 6.309 | 9.399  | 0.003 | 0.000  | 0.000  | 0.000  | 0.000  | 0.000 | 33 |
| 2407 | Ti2CdSi | Ti | Cd | Si | l21 | 1.297  | -0.090 | 6.427 | 9.236  | 0.000 | 0.001  | 0.001  | 0.000  | 0.000  | 0.002 | 14 |
| 1999 | Ru2PdSb | Ru | Pd | Sb | l21 | 0.618  | 0.097  | 6.302 | 9.229  | 0.007 | 0.004  | 0.004  | 0.002  | 0.000  | 0.010 | 31 |





|      |         |    |    |    |     |        |        |       |       |       |        |        |        |        |       |    |
|------|---------|----|----|----|-----|--------|--------|-------|-------|-------|--------|--------|--------|--------|-------|----|
| 2554 | Ti2RuB  | Ti | Ru | B  | l21 | 0.187  | -0.128 | 5.944 | 7.476 | 0.003 | 0.001  | 0.001  | 0.000  | 0.000  | 0.002 | 19 |
| 2081 | Ru2YB   | Ru | Y  | B  | l21 | 0.190  | 0.485  | 6.136 | 7.454 | 0.003 | 0.000  | 0.000  | 0.000  | 0.000  | 0.000 | 22 |
| 2505 | Ti2NbSb | Ti | Nb | Sb | l21 | 0.621  | -0.267 | 6.572 | 7.436 | 0.000 | 0.000  | 0.000  | 0.000  | 0.000  | 0.000 | 18 |
| 1418 | Pd2IrSn | Pd | Ir | Sn | xa  | -0.547 | -0.205 | 6.384 | 7.432 | 0.000 | 0.000  | 0.000  | 0.000  | 0.000  | 0.000 | 33 |
| 2300 | Sc2ScAs | Sc | Sc | As | l21 | 0.000  | -0.224 | 6.867 | 7.420 | 0.003 | 0.000  | 0.000  | 0.001  | 0.000  | 0.001 | 14 |
| 1119 | Ni2CuPb | Ni | Cu | Pb | l21 | 0.317  | 0.166  | 6.076 | 7.412 | 0.000 | 0.000  | 0.000  | 0.000  | 0.000  | 0.000 | 25 |
| 1254 | Ni2ScSn | Ni | Sc | Sn | l21 | 1.232  | -0.548 | 6.247 | 7.370 | 0.000 | 0.000  | 0.000  | 0.000  | 0.000  | 0.000 | 27 |
| 2079 | Ru2YAl  | Ru | Y  | Al | l21 | 1.461  | -0.319 | 6.408 | 7.304 | 0.000 | 0.000  | 0.000  | 0.000  | 0.000  | 0.000 | 22 |
| 1531 | Pd2VB   | Pd | V  | B  | xa  | -0.229 | 0.282  | 5.886 | 7.303 | 0.153 | -0.014 | 0.009  | 0.106  | -0.002 | 0.099 | 28 |
| 2849 | V2VAl   | V  | V  | Al | l21 | 0.002  | -0.100 | 6.047 | 7.298 | 0.010 | 0.002  | 0.002  | -0.003 | 0.000  | 0.001 | 18 |
| 287  | Cr2CdAl | Cr | Cd | Al | xa  | -0.270 | 0.281  | 6.320 | 7.272 | 0.069 | 3.089  | -2.882 | 0.035  | -0.007 | 0.235 | 17 |
| 1208 | Ni2PdSb | Ni | Pd | Sb | l21 | 0.239  | -0.175 | 6.092 | 7.261 | 0.000 | 0.000  | 0.000  | 0.000  | 0.000  | 0.000 | 35 |
| 2132 | Sc2AuSi | Sc | Au | Si | l21 | 2.054  | -0.658 | 6.727 | 7.246 | 0.665 | 0.145  | 0.145  | 0.019  | -0.011 | 0.298 | 11 |
| 2903 | V2ZrSn  | V  | Zr | Sn | l21 | 0.022  | 0.015  | 6.509 | 7.241 | 0.001 | 0.001  | 0.001  | -0.001 | 0.000  | 0.001 | 18 |
| 1075 | Ni2AuPb | Ni | Au | Pb | l21 | 0.710  | 0.136  | 6.295 | 7.208 | 0.002 | 0.001  | 0.001  | 0.000  | 0.000  | 0.002 | 25 |
| 1489 | Pd2RhGa | Pd | Rh | Ga | xa  | -0.338 | -0.348 | 6.176 | 7.199 | 0.001 | 0.000  | 0.000  | 0.000  | 0.000  | 0.000 | 32 |
| 1528 | Pd2TiSn | Pd | Ti | Sn | l21 | 0.536  | -0.597 | 6.459 | 7.182 | 0.000 | 0.000  | 0.000  | 0.000  | 0.000  | 0.000 | 28 |
| 2618 | Ti2ZnAl | Ti | Zn | Al | l21 | 0.898  | -0.232 | 6.340 | 7.160 | 0.012 | 0.003  | 0.003  | 0.000  | 0.000  | 0.006 | 13 |
| 1771 | Rh2ScAl | Rh | Sc | Al | l21 | 2.391  | -1.073 | 6.221 | 7.122 | 0.001 | 0.000  | 0.000  | 0.000  | 0.000  | 0.000 | 24 |
| 112  | Co2MoAs | Co | Mo | As | xa  | -0.792 | 0.098  | 5.872 | 7.121 | 0.002 | 0.000  | 0.001  | 0.000  | 0.000  | 0.001 | 29 |
| 1812 | Rh2WSb  | Rh | W  | Sb | xa  | -0.552 | 0.138  | 6.363 | 7.121 | 0.000 | 0.000  | 0.000  | 0.000  | 0.000  | 0.000 | 29 |
| 2084 | Ru2YGe  | Ru | Y  | Ge | l21 | 1.442  | -0.268 | 6.404 | 7.121 | 0.001 | 0.000  | 0.000  | 0.000  | 0.000  | 0.000 | 23 |
| 1113 | Ni2CuAs | Ni | Cu | As | l21 | 0.413  | -0.083 | 5.771 | 7.106 | 0.001 | 0.000  | 0.000  | 0.000  | 0.000  | 0.000 | 26 |
| 866  | Mn2FePb | Mn | Fe | Pb | xa  | -0.486 | 0.407  | 6.264 | 7.092 | 0.025 | -3.525 | 3.024  | 1.884  | -0.076 | 1.307 | 26 |
| 282  | Cr2AuIn | Cr | Au | In | xa  | -0.268 | 0.211  | 6.517 | 7.083 | 0.014 | 3.454  | -3.366 | 0.040  | -0.051 | 0.077 | 16 |
| 33   | Co2CdSn | Co | Cd | Sn | l21 | 1.316  | 0.177  | 6.219 | 7.066 | 0.219 | 0.503  | 0.503  | -0.023 | -0.048 | 0.935 | 24 |
| 1109 | Ni2CrSb | Ni | Cr | Sb | l21 | 0.369  | 0.010  | 6.049 | 7.002 | 0.196 | 0.089  | 0.089  | 3.121  | -0.049 | 3.250 | 31 |
| 23   | Co2CdAl | Co | Cd | Al | l21 | 0.879  | 0.026  | 5.979 | 6.996 | 0.000 | 0.000  | 0.000  | 0.000  | 0.000  | 0.000 | 23 |
| 2410 | Ti2CoAs | Ti | Co | As | l21 | 0.816  | -0.362 | 6.143 | 6.981 | 0.106 | 0.373  | 0.373  | 1.006  | 0.029  | 1.781 | 22 |

|      |         |    |    |    |     |        |        |       |       |       |        |        |        |        |       |    |
|------|---------|----|----|----|-----|--------|--------|-------|-------|-------|--------|--------|--------|--------|-------|----|
| 2117 | Sc2AgGe | Sc | Ag | Ge | 121 | 2.033  | -0.520 | 6.770 | 6.978 | 0.176 | 0.228  | 0.228  | 0.018  | -0.021 | 0.453 | 11 |
| 1212 | Ni2PtAs | Ni | Pt | As | 121 | 0.074  | -0.042 | 5.964 | 6.968 | 0.000 | 0.000  | 0.000  | 0.000  | 0.000  | 0.000 | 35 |
| 2001 | Ru2PdSn | Ru | Pd | Sn | 121 | 0.238  | 0.114  | 6.308 | 6.955 | 0.002 | 0.001  | 0.001  | 0.000  | 0.000  | 0.002 | 30 |
| 1135 | Ni2HfAs | Ni | Hf | As | 121 | 0.307  | -0.365 | 6.100 | 6.938 | 0.000 | 0.000  | 0.000  | 0.000  | 0.000  | 0.000 | 29 |
| 1201 | Ni2PdAs | Ni | Pd | As | 121 | 0.131  | -0.085 | 5.924 | 6.935 | 0.000 | 0.000  | 0.000  | 0.000  | 0.000  | 0.000 | 35 |
| 1465 | Pd2PdB  | Pd | Pd | B  | 121 | 0.000  | 0.411  | 5.972 | 6.900 | 0.000 | 0.000  | 0.000  | 0.000  | 0.000  | 0.000 | 33 |
| 432  | Cr2RhB  | Cr | Rh | B  | xa  | -1.027 | 0.193  | 5.611 | 6.894 | 0.933 | 1.422  | -1.340 | -0.006 | 0.015  | 0.091 | 24 |
| 2023 | Ru2RhSn | Ru | Rh | Sn | 121 | 0.285  | 0.148  | 6.277 | 6.894 | 0.001 | 0.001  | 0.001  | 0.001  | 0.000  | 0.003 | 29 |
| 1837 | Rh2ZrAl | Rh | Zr | Al | 121 | 2.207  | -0.952 | 6.325 | 6.877 | 0.001 | 0.000  | 0.000  | 0.000  | 0.000  | 0.000 | 25 |
| 1931 | Ru2HfIn | Ru | Hf | In | 121 | 2.309  | -0.409 | 6.461 | 6.801 | 0.001 | 0.000  | 0.000  | 0.000  | 0.000  | 0.000 | 23 |
| 1861 | Ru2AuB  | Ru | Au | B  | 121 | 0.833  | 0.773  | 5.960 | 6.690 | 0.003 | 0.002  | 0.002  | 0.000  | 0.000  | 0.004 | 20 |
| 1445 | Pd2NbGa | Pd | Nb | Ga | 121 | 0.040  | -0.371 | 6.349 | 6.688 | 0.001 | 0.000  | 0.000  | 0.000  | 0.000  | 0.000 | 28 |
| 1577 | Pd2ZrGa | Pd | Zr | Ga | 121 | 0.578  | -0.736 | 6.447 | 6.656 | 0.000 | 0.000  | 0.000  | 0.000  | 0.000  | 0.000 | 27 |
| 1203 | Ni2PdBi | Ni | Pd | Bi | 121 | 0.286  | 0.050  | 6.240 | 6.611 | 0.000 | 0.000  | 0.000  | 0.000  | 0.000  | 0.000 | 35 |
| 1326 | Pd2AgGe | Pd | Ag | Ge | 121 | 0.431  | -0.225 | 6.318 | 6.611 | 0.000 | 0.000  | 0.000  | 0.000  | 0.000  | 0.000 | 25 |
| 1839 | Rh2ZrB  | Rh | Zr | B  | 121 | 1.045  | -0.167 | 6.075 | 6.584 | 0.000 | 0.000  | 0.000  | 0.000  | 0.000  | 0.000 | 25 |
| 1308 | Ni2ZnSi | Ni | Zn | Si | 121 | 0.950  | -0.360 | 5.679 | 6.581 | 0.000 | 0.000  | 0.000  | 0.000  | 0.000  | 0.000 | 26 |
| 65   | Co2CuSi | Co | Cu | Si | 121 | 0.691  | -0.247 | 5.561 | 6.567 | 0.007 | 0.008  | 0.008  | 0.000  | -0.001 | 0.015 | 23 |
| 1527 | Pd2TiSi | Pd | Ti | Si | 121 | 0.292  | -0.584 | 6.187 | 6.544 | 0.000 | 0.000  | 0.000  | 0.000  | 0.000  | 0.000 | 28 |
| 1671 | Rh2HfSn | Rh | Hf | Sn | 121 | 1.869  | -0.758 | 6.491 | 6.540 | 0.005 | 0.000  | 0.000  | 0.000  | 0.000  | 0.000 | 26 |
| 516  | Cr2ZnSi | Cr | Zn | Si | xa  | 0.000  | 0.085  | 5.829 | 6.481 | 1.000 | 1.625  | -1.579 | 0.023  | -0.024 | 0.045 | 18 |
| 1036 | Mn2ZnAs | Mn | Zn | As | 121 | 0.203  | 0.089  | 5.857 | 6.474 | 0.586 | 1.465  | 1.465  | -0.026 | -0.084 | 2.820 | 21 |
| 2590 | Ti2VGe  | Ti | V  | Ge | 121 | 0.295  | -0.293 | 6.236 | 6.469 | 0.002 | 0.000  | 0.000  | 0.004  | 0.000  | 0.004 | 17 |
| 1975 | Ru2NbIn | Ru | Nb | In | 121 | 2.256  | -0.246 | 6.389 | 6.455 | 0.000 | 0.000  | 0.000  | 0.000  | 0.000  | 0.000 | 24 |
| 2251 | Sc2NiPb | Sc | Ni | Pb | 121 | 1.263  | -0.296 | 6.847 | 6.431 | 0.002 | 0.000  | 0.000  | 0.000  | 0.000  | 0.000 | 20 |
| 1218 | Ni2PtPb | Ni | Pt | Pb | 121 | 0.356  | 0.065  | 6.197 | 6.419 | 0.000 | 0.000  | 0.000  | 0.000  | 0.000  | 0.000 | 34 |
| 2381 | Ti2AgGe | Ti | Ag | Ge | 121 | 1.255  | -0.195 | 6.415 | 6.398 | 0.002 | 0.002  | 0.002  | 0.000  | 0.000  | 0.004 | 13 |
| 1246 | Ni2ScB  | Ni | Sc | B  | 121 | 0.194  | -0.044 | 5.672 | 6.333 | 0.003 | 0.000  | 0.000  | 0.000  | 0.000  | 0.000 | 26 |
| 826  | Mn2CoAl | Mn | Co | Al | xa  | -0.670 | -0.138 | 5.720 | 6.332 | 0.055 | -0.239 | -0.267 | 0.556  | -0.003 | 0.047 | 26 |

|      |         |    |    |    |     |        |        |       |       |       |        |        |       |        |       |    |
|------|---------|----|----|----|-----|--------|--------|-------|-------|-------|--------|--------|-------|--------|-------|----|
| 1321 | Pd2AgAl | Pd | Ag | Al | l21 | 0.456  | -0.498 | 6.268 | 6.316 | 0.000 | 0.000  | 0.000  | 0.000 | 0.000  | 0.000 | 24 |
| 2377 | Ti2AgAs | Ti | Ag | As | l21 | 1.628  | -0.219 | 6.410 | 6.291 | 0.000 | 0.000  | 0.000  | 0.000 | 0.000  | 0.000 | 14 |
| 2395 | Ti2AuSb | Ti | Au | Sb | l21 | 1.481  | -0.290 | 6.642 | 6.283 | 0.005 | 0.002  | 0.002  | 0.000 | 0.000  | 0.004 | 14 |
| 1799 | Rh2VIn  | Rh | V  | In | l21 | 1.104  | -0.260 | 6.268 | 6.278 | 0.000 | 0.000  | 0.000  | 0.000 | 0.000  | 0.000 | 26 |
| 1414 | Pd2IrIn | Pd | Ir | In | xa  | -0.142 | -0.109 | 6.389 | 6.227 | 0.005 | 0.001  | 0.001  | 0.004 | 0.000  | 0.006 | 32 |
| 2670 | V2CdSb  | V  | Cd | Sb | l21 | 0.694  | 0.368  | 6.657 | 6.224 | 0.427 | 2.239  | 2.239  | 0.036 | -0.044 | 4.470 | 17 |
| 1481 | Pd2PtPb | Pd | Pt | Pb | xa  | -0.027 | -0.151 | 6.515 | 6.220 | 0.000 | 0.000  | 0.000  | 0.000 | 0.000  | 0.000 | 34 |
| 2382 | Ti2AgIn | Ti | Ag | In | l21 | 0.222  | -0.006 | 6.677 | 6.197 | 0.007 | 0.001  | 0.001  | 0.000 | -0.001 | 0.001 | 12 |
| 2593 | Ti2VSb  | Ti | V  | Sb | l21 | 0.009  | -0.185 | 6.439 | 6.194 | 0.008 | 0.000  | 0.000  | 0.001 | 0.000  | 0.001 | 18 |
| 1249 | Ni2ScGe | Ni | Sc | Ge | l21 | 0.793  | -0.559 | 6.018 | 6.181 | 0.001 | 0.000  | 0.000  | 0.000 | 0.000  | 0.000 | 27 |
| 2192 | Sc2HfBi | Sc | Hf | Bi | l21 | 0.246  | -0.017 | 7.173 | 6.161 | 0.004 | 0.000  | 0.000  | 0.002 | 0.000  | 0.002 | 15 |
| 2586 | Ti2VAs  | Ti | V  | As | l21 | 0.206  | -0.298 | 6.199 | 6.134 | 0.001 | 0.000  | 0.000  | 0.001 | 0.000  | 0.001 | 18 |
| 2401 | Ti2CdBi | Ti | Cd | Bi | l21 | 0.823  | 0.157  | 6.881 | 6.132 | 0.013 | 0.001  | 0.001  | 0.000 | 0.000  | 0.002 | 15 |
| 1754 | Rh2RhGe | Rh | Rh | Ge | xa  | 0.000  | -0.091 | 6.119 | 6.116 | 0.004 | 0.001  | 0.000  | 0.000 | 0.000  | 0.001 | 31 |
| 1536 | Pd2VPb  | Pd | V  | Pb | xa  | -0.059 | 0.047  | 6.463 | 6.101 | 0.006 | -0.001 | -0.001 | 0.016 | 0.000  | 0.014 | 29 |
| 1066 | Ni2AgSi | Ni | Ag | Si | l21 | 0.469  | -0.064 | 5.861 | 6.037 | 0.001 | 0.001  | 0.001  | 0.000 | 0.000  | 0.002 | 25 |
| 1927 | Ru2HfB  | Ru | Hf | B  | l21 | 1.461  | 0.012  | 6.015 | 5.981 | 0.006 | 0.001  | 0.001  | 0.000 | 0.000  | 0.002 | 23 |
| 2205 | Sc2IrGe | Sc | Ir | Ge | l21 | 0.829  | -0.774 | 6.603 | 5.950 | 0.000 | 0.000  | 0.000  | 0.000 | 0.000  | 0.000 | 19 |
| 702  | Fe2RhSb | Fe | Rh | Sb | xa  | -0.029 | 0.116  | 6.155 | 5.941 | 0.315 | 2.817  | -1.897 | 0.163 | 0.050  | 1.133 | 30 |
| 2594 | Ti2VSi  | Ti | V  | Si | l21 | 0.282  | -0.358 | 6.164 | 5.932 | 0.013 | 0.000  | 0.000  | 0.007 | 0.000  | 0.007 | 17 |
| 2000 | Ru2PdSi | Ru | Pd | Si | l21 | 0.695  | -0.091 | 6.031 | 5.901 | 0.006 | 0.006  | 0.006  | 0.003 | 0.000  | 0.015 | 30 |
| 1841 | Rh2ZrGa | Rh | Zr | Ga | l21 | 1.776  | -0.849 | 6.325 | 5.887 | 0.004 | 0.001  | 0.001  | 0.000 | 0.000  | 0.002 | 25 |
| 1544 | Pd2WGa  | Pd | W  | Ga | xa  | -0.226 | 0.018  | 6.239 | 5.882 | 0.000 | 0.000  | 0.000  | 0.000 | 0.000  | 0.000 | 29 |
| 1808 | Rh2WGa  | Rh | W  | Ga | l21 | 0.417  | -0.099 | 6.187 | 5.870 | 0.014 | 0.003  | 0.003  | 0.004 | 0.000  | 0.010 | 27 |
| 2234 | Sc2NbAs | Sc | Nb | As | l21 | 0.420  | -0.219 | 6.701 | 5.869 | 0.016 | 0.000  | 0.000  | 0.015 | 0.000  | 0.015 | 16 |
| 1220 | Ni2PtSi | Ni | Pt | Si | xa  | -0.355 | -0.347 | 5.807 | 5.859 | 0.000 | 0.000  | 0.000  | 0.000 | 0.000  | 0.000 | 34 |
| 1579 | Pd2ZrIn | Pd | Zr | In | l21 | 0.994  | -0.721 | 6.620 | 5.854 | 0.000 | 0.000  | 0.000  | 0.000 | 0.000  | 0.000 | 27 |
| 230  | Co2WSi  | Co | W  | Si | xa  | -0.038 | -0.043 | 5.790 | 5.823 | 0.001 | 0.000  | 0.001  | 0.000 | 0.000  | 0.001 | 28 |
| 2374 | Sc2ZrSi | Sc | Zr | Si | xa  | -0.141 | -0.175 | 6.792 | 5.805 | 0.003 | 0.001  | 0.000  | 0.000 | 0.000  | 0.001 | 14 |



|      |         |    |    |    |     |        |        |       |       |       |       |       |        |        |       |    |
|------|---------|----|----|----|-----|--------|--------|-------|-------|-------|-------|-------|--------|--------|-------|----|
| 2500 | Ti2NbBi | Ti | Nb | Bi | l21 | 0.647  | 0.008  | 6.692 | 5.431 | 0.008 | 0.001 | 0.001 | -0.001 | 0.000  | 0.001 | 18 |
| 1470 | Pd2PdPb | Pd | Pd | Pb | xa  | 0.000  | -0.232 | 6.500 | 5.419 | 0.000 | 0.000 | 0.000 | 0.000  | 0.000  | 0.000 | 34 |
| 1997 | Ru2PdIn | Ru | Pd | In | xa  | -0.202 | 0.219  | 6.326 | 5.414 | 0.000 | 0.001 | 0.001 | 0.000  | 0.000  | 0.002 | 29 |
| 2276 | Sc2PtSn | Sc | Pt | Sn | l21 | 1.126  | -0.819 | 6.869 | 5.385 | 0.001 | 0.000 | 0.000 | 0.000  | 0.000  | 0.000 | 20 |
| 1395 | Pd2FeSi | Pd | Fe | Si | l21 | 0.191  | -0.241 | 6.052 | 5.369 | 0.473 | 0.069 | 0.069 | 2.977  | -0.013 | 3.102 | 32 |
| 1024 | Mn2YAl  | Mn | Y  | Al | l21 | 0.333  | 0.011  | 6.495 | 5.356 | 0.374 | 0.000 | 0.000 | 0.008  | 0.000  | 0.008 | 20 |
| 1233 | Ni2RuAl | Ni | Ru | Al | xa  | -0.304 | -0.222 | 5.818 | 5.346 | 0.000 | 0.001 | 0.000 | 0.001  | 0.000  | 0.002 | 31 |
| 2596 | Ti2WAl  | Ti | W  | Al | l21 | 0.795  | -0.241 | 6.359 | 5.345 | 0.003 | 0.001 | 0.001 | -0.001 | 0.000  | 0.001 | 17 |
| 2314 | Sc2TiGa | Sc | Ti | Ga | l21 | 0.389  | -0.197 | 6.829 | 5.339 | 0.121 | 0.332 | 0.332 | 1.570  | -0.058 | 2.176 | 13 |
| 1668 | Rh2HfPb | Rh | Hf | Pb | l21 | 1.588  | -0.461 | 6.572 | 5.322 | 0.000 | 0.000 | 0.000 | 0.000  | 0.000  | 0.000 | 26 |
| 1121 | Ni2CuSi | Ni | Cu | Si | l21 | 0.448  | -0.336 | 5.610 | 5.298 | 0.000 | 0.000 | 0.000 | 0.000  | 0.000  | 0.000 | 25 |
| 1384 | Pd2CuSi | Pd | Cu | Si | l21 | 0.732  | -0.394 | 6.001 | 5.291 | 0.000 | 0.000 | 0.000 | 0.000  | 0.000  | 0.000 | 25 |
| 2014 | Ru2RhAs | Ru | Rh | As | l21 | 0.589  | 0.165  | 6.103 | 5.271 | 0.036 | 0.005 | 0.005 | 0.004  | 0.000  | 0.014 | 30 |
| 2167 | Sc2CuAl | Sc | Cu | Al | l21 | 1.243  | -0.344 | 6.679 | 5.211 | 0.000 | 0.000 | 0.000 | 0.000  | 0.000  | 0.000 | 10 |
| 1114 | Ni2CuB  | Ni | Cu | B  | l21 | 0.422  | 0.179  | 5.362 | 5.211 | 0.001 | 0.001 | 0.001 | 0.000  | 0.000  | 0.002 | 24 |
| 1083 | Ni2CdGa | Ni | Cd | Ga | l21 | 0.643  | -0.116 | 6.037 | 5.209 | 0.002 | 0.000 | 0.000 | 0.000  | 0.000  | 0.000 | 25 |
| 1593 | Rh2AgSi | Rh | Ag | Si | l21 | 1.221  | -0.226 | 6.105 | 5.194 | 0.002 | 0.001 | 0.001 | 0.000  | 0.000  | 0.002 | 23 |
| 1670 | Rh2HfSi | Rh | Hf | Si | l21 | 1.548  | -0.791 | 6.243 | 5.191 | 0.010 | 0.001 | 0.001 | 0.000  | 0.000  | 0.002 | 26 |
| 1263 | Ni2TiSb | Ni | Ti | Sb | l21 | 0.628  | -0.347 | 6.115 | 5.162 | 0.000 | 0.000 | 0.000 | 0.000  | 0.000  | 0.000 | 29 |
| 1310 | Ni2ZrAl | Ni | Zr | Al | l21 | 1.285  | -0.613 | 6.113 | 5.129 | 0.001 | 0.000 | 0.000 | 0.000  | 0.000  | 0.000 | 27 |
| 1468 | Pd2PdGe | Pd | Pd | Ge | l21 | 0.000  | -0.311 | 6.232 | 5.076 | 0.000 | 0.000 | 0.000 | 0.000  | 0.000  | 0.000 | 34 |
| 1120 | Ni2CuSb | Ni | Cu | Sb | l21 | 0.463  | -0.086 | 5.976 | 5.072 | 0.000 | 0.000 | 0.000 | 0.000  | 0.000  | 0.000 | 26 |
| 2137 | Sc2CdBi | Sc | Cd | Bi | l21 | 1.477  | -0.304 | 7.250 | 5.052 | 0.001 | 0.001 | 0.001 | 0.000  | 0.000  | 0.002 | 13 |
| 1325 | Pd2AgGa | Pd | Ag | Ga | l21 | 0.422  | -0.386 | 6.283 | 5.034 | 0.000 | 0.000 | 0.000 | 0.000  | 0.000  | 0.000 | 24 |
| 2037 | Ru2ScB  | Ru | Sc | B  | l21 | 0.671  | 0.145  | 5.925 | 5.030 | 0.001 | 0.001 | 0.001 | 0.000  | 0.000  | 0.002 | 22 |
| 1700 | Rh2MoIn | Rh | Mo | In | l21 | 0.546  | 0.008  | 6.358 | 5.027 | 0.001 | 0.001 | 0.001 | 0.001  | 0.000  | 0.003 | 27 |
| 2516 | Ti2NiSb | Ti | Ni | Sb | l21 | 0.697  | -0.223 | 6.393 | 5.025 | 0.164 | 0.166 | 0.166 | 0.058  | -0.001 | 0.389 | 23 |
| 2764 | V2NbBi  | V  | Nb | Bi | l21 | 0.417  | 0.293  | 6.516 | 5.015 | 0.608 | 1.129 | 1.129 | -0.327 | -0.006 | 1.925 | 20 |
| 213  | Co2VBi  | Co | V  | Bi | l21 | 0.272  | 0.402  | 6.164 | 4.980 | 0.854 | 0.909 | 0.909 | -1.291 | 0.027  | 0.554 | 28 |



|      |         |    |    |    |     |        |        |       |       |       |       |       |        |        |       |    |
|------|---------|----|----|----|-----|--------|--------|-------|-------|-------|-------|-------|--------|--------|-------|----|
| 1316 | Ni2ZrIn | Ni | Zr | In | l21 | 1.378  | -0.435 | 6.308 | 4.978 | 0.001 | 0.000 | 0.000 | 0.000  | 0.000  | 0.000 | 27 |
| 1645 | Rh2CuIn | Rh | Cu | In | l21 | 0.594  | -0.183 | 6.214 | 4.976 | 0.000 | 0.000 | 0.000 | 0.000  | 0.000  | 0.000 | 22 |
| 1197 | Ni2NiSb | Ni | Ni | Sb | l21 | 0.002  | -0.098 | 5.915 | 4.963 | 0.000 | 0.000 | 0.000 | 0.000  | 0.000  | 0.000 | 35 |
| 1602 | Rh2AuPb | Rh | Au | Pb | l21 | 0.923  | 0.022  | 6.495 | 4.962 | 0.000 | 0.000 | 0.000 | 0.000  | 0.000  | 0.000 | 23 |
| 1153 | Ni2IrSb | Ni | Ir | Sb | xa  | -0.317 | 0.024  | 6.102 | 4.958 | 0.000 | 0.000 | 0.000 | 0.000  | 0.000  | 0.000 | 34 |
| 1227 | Ni2RhGe | Ni | Rh | Ge | xa  | -0.500 | -0.227 | 5.837 | 4.956 | 0.001 | 0.000 | 0.000 | 0.000  | 0.000  | 0.000 | 33 |
| 2142 | Sc2CdSb | Sc | Cd | Sb | l21 | 1.687  | -0.421 | 7.123 | 4.931 | 0.012 | 0.005 | 0.005 | 0.000  | 0.000  | 0.010 | 13 |
| 1542 | Pd2WB   | Pd | W  | B  | xa  | -1.251 | 0.496  | 5.977 | 4.920 | 0.000 | 0.000 | 0.000 | 0.000  | 0.000  | 0.000 | 29 |
| 1805 | Rh2WAs  | Rh | W  | As | xa  | -0.976 | 0.058  | 6.188 | 4.905 | 0.000 | 0.000 | 0.000 | 0.000  | 0.000  | 0.000 | 29 |
| 1469 | Pd2PdIn | Pd | Pd | In | l21 | 0.000  | -0.455 | 6.401 | 4.904 | 0.000 | 0.000 | 0.000 | 0.000  | 0.000  | 0.000 | 33 |
| 1322 | Pd2AgAs | Pd | Ag | As | l21 | 0.351  | -0.148 | 6.370 | 4.892 | 0.000 | 0.000 | 0.000 | 0.000  | 0.000  | 0.000 | 26 |
| 2637 | Ti2ZrSb | Ti | Zr | Sb | l21 | 0.451  | -0.258 | 6.688 | 4.888 | 0.000 | 0.000 | 0.000 | 0.000  | 0.000  | 0.000 | 17 |
| 1929 | Ru2HfGa | Ru | Hf | Ga | l21 | 2.182  | -0.590 | 6.268 | 4.884 | 0.001 | 0.001 | 0.001 | 0.000  | 0.000  | 0.002 | 23 |
| 2094 | Ru2ZnGa | Ru | Zn | Ga | l21 | 0.748  | -0.085 | 6.041 | 4.881 | 0.164 | 0.063 | 0.063 | 0.001  | -0.002 | 0.125 | 21 |
| 1245 | Ni2ScAs | Ni | Sc | As | l21 | 0.499  | -0.504 | 6.039 | 4.874 | 0.000 | 0.000 | 0.000 | 0.000  | 0.000  | 0.000 | 28 |
| 2249 | Sc2NiGe | Sc | Ni | Ge | l21 | 1.720  | -0.613 | 6.518 | 4.867 | 0.000 | 0.000 | 0.000 | 0.000  | 0.000  | 0.000 | 20 |
| 2230 | Sc2MoSb | Sc | Mo | Sb | l21 | 0.492  | -0.241 | 6.794 | 4.859 | 0.001 | 0.001 | 0.001 | -0.002 | 0.000  | 0.000 | 17 |
| 1850 | Ru2AgB  | Ru | Ag | B  | l21 | 0.398  | 0.859  | 5.904 | 4.849 | 0.001 | 0.001 | 0.001 | 0.000  | 0.000  | 0.002 | 20 |
| 791  | Fe2ZrSi | Fe | Zr | Si | l21 | 1.730  | -0.469 | 5.920 | 4.846 | 0.039 | 0.001 | 0.001 | -0.001 | 0.000  | 0.001 | 24 |
| 2488 | Ti2MoB  | Ti | Mo | B  | l21 | 0.786  | 0.036  | 6.004 | 4.813 | 0.000 | 0.000 | 0.000 | 0.000  | 0.000  | 0.000 | 17 |
| 1270 | Ni2VGa  | Ni | V  | Ga | l21 | 0.309  | -0.294 | 5.789 | 4.801 | 0.001 | 0.000 | 0.000 | 0.001  | 0.000  | 0.001 | 28 |
| 1207 | Ni2PdPb | Ni | Pd | Pb | l21 | 0.215  | 0.048  | 6.182 | 4.799 | 0.000 | 0.000 | 0.000 | 0.000  | 0.000  | 0.000 | 34 |
| 1415 | Pd2IrPb | Pd | Ir | Pb | xa  | -0.416 | 0.086  | 6.477 | 4.774 | 0.000 | 0.000 | 0.000 | 0.000  | 0.000  | 0.000 | 33 |
| 1204 | Ni2PdGa | Ni | Pd | Ga | xa  | -0.114 | -0.293 | 5.872 | 4.771 | 0.000 | 0.000 | 0.000 | 0.000  | 0.000  | 0.000 | 33 |
| 1260 | Ni2TiGe | Ni | Ti | Ge | l21 | 0.496  | -0.498 | 5.879 | 4.748 | 0.000 | 0.000 | 0.000 | 0.000  | 0.000  | 0.000 | 28 |
| 1459 | Pd2NiPb | Pd | Ni | Pb | xa  | -0.018 | -0.060 | 6.360 | 4.708 | 0.000 | 0.000 | 0.000 | 0.000  | 0.000  | 0.000 | 34 |
| 1330 | Pd2AgSi | Pd | Ag | Si | l21 | 0.512  | -0.238 | 6.218 | 4.656 | 0.000 | 0.000 | 0.000 | 0.000  | 0.000  | 0.000 | 25 |
| 1100 | Ni2CoSn | Ni | Co | Sn | xa  | -0.070 | -0.011 | 5.905 | 4.652 | 0.636 | 0.125 | 0.062 | 0.718  | -0.040 | 0.865 | 33 |
| 2197 | Sc2HfSb | Sc | Hf | Sb | l21 | 0.183  | -0.178 | 7.041 | 4.652 | 0.001 | 0.000 | 0.000 | 0.002  | 0.000  | 0.002 | 15 |

|      |         |    |    |    |     |        |        |       |       |       |        |       |        |        |       |    |
|------|---------|----|----|----|-----|--------|--------|-------|-------|-------|--------|-------|--------|--------|-------|----|
| 1139 | Ni2HfGe | Ni | Hf | Ge | 121 | 0.798  | -0.504 | 6.061 | 4.646 | 0.000 | 0.000  | 0.000 | 0.000  | 0.000  | 0.000 | 28 |
| 1739 | Rh2PtAs | Rh | Pt | As | 121 | 0.392  | -0.007 | 6.211 | 4.644 | 0.001 | 0.000  | 0.000 | 0.000  | 0.000  | 0.000 | 33 |
| 1958 | Ru2MoAl | Ru | Mo | Al | 121 | 1.469  | -0.301 | 6.109 | 4.639 | 0.000 | 0.000  | 0.000 | 0.002  | 0.000  | 0.002 | 25 |
| 1099 | Ni2CoSi | Ni | Co | Si | xa  | -0.280 | -0.313 | 5.548 | 4.632 | 0.001 | 0.000  | 0.000 | 0.000  | 0.000  | 0.000 | 33 |
| 1499 | Pd2RuBi | Pd | Ru | Bi | xa  | -0.689 | 0.116  | 6.490 | 4.557 | 0.001 | 0.000  | 0.000 | 0.000  | 0.000  | 0.000 | 33 |
| 1600 | Rh2AuGe | Rh | Au | Ge | 121 | 0.939  | -0.131 | 6.242 | 4.536 | 0.000 | 0.000  | 0.000 | 0.000  | 0.000  | 0.000 | 23 |
| 1062 | Ni2AgGe | Ni | Ag | Ge | 121 | 0.502  | 0.003  | 5.962 | 4.532 | 0.000 | 0.000  | 0.000 | 0.000  | 0.000  | 0.000 | 25 |
| 454  | Cr2ScB  | Cr | Sc | B  | xa  | -1.351 | 0.270  | 5.819 | 4.532 | 0.582 | -1.542 | 1.759 | -0.174 | -0.011 | 0.032 | 18 |
| 846  | Mn2CrSi | Mn | Cr | Si | 121 | 0.342  | -0.397 | 5.583 | 4.521 | 0.065 | 0.011  | 0.011 | -0.009 | 0.000  | 0.013 | 24 |
| 1198 | Ni2NiSi | Ni | Ni | Si | xa  | 0.000  | -0.372 | 5.567 | 4.519 | 0.000 | 0.000  | 0.000 | 0.000  | 0.000  | 0.000 | 34 |
| 1182 | Ni2NbGa | Ni | Nb | Ga | 121 | 0.497  | -0.343 | 5.986 | 4.506 | 0.000 | 0.000  | 0.000 | 0.000  | 0.000  | 0.000 | 28 |
| 2093 | Ru2ZnBi | Ru | Zn | Bi | 121 | 1.229  | 0.254  | 6.377 | 4.490 | 0.000 | 0.000  | 0.000 | 0.000  | 0.000  | 0.000 | 23 |
| 1586 | Rh2AgB  | Rh | Ag | B  | 121 | 0.758  | 0.575  | 5.936 | 4.472 | 0.004 | 0.002  | 0.002 | 0.000  | 0.000  | 0.004 | 22 |
| 2357 | Sc2ZnBi | Sc | Zn | Bi | 121 | 1.566  | -0.307 | 7.095 | 4.459 | 0.001 | 0.001  | 0.001 | 0.000  | 0.000  | 0.002 | 13 |
| 1209 | Ni2PdSi | Ni | Pd | Si | xa  | -0.106 | -0.309 | 5.783 | 4.458 | 0.000 | 0.000  | 0.000 | 0.000  | 0.000  | 0.000 | 34 |
| 1516 | Pd2ScSi | Pd | Sc | Si | 121 | 0.745  | -0.793 | 6.308 | 4.450 | 0.000 | 0.000  | 0.000 | 0.000  | 0.000  | 0.000 | 27 |
| 1790 | Rh2TiSb | Rh | Ti | Sb | 121 | 0.840  | -0.519 | 6.363 | 4.430 | 0.000 | 0.000  | 0.000 | 0.000  | 0.000  | 0.000 | 27 |
| 1309 | Ni2ZnSn | Ni | Zn | Sn | 121 | 0.849  | -0.185 | 6.047 | 4.419 | 0.000 | 0.000  | 0.000 | 0.000  | 0.000  | 0.000 | 26 |
| 1681 | Rh2IrSi | Rh | Ir | Si | xa  | -0.395 | -0.101 | 6.060 | 4.418 | 0.006 | 0.001  | 0.003 | 0.003  | 0.000  | 0.007 | 31 |
| 2863 | V2WBi   | V  | W  | Bi | 121 | 0.393  | 0.519  | 6.441 | 4.394 | 0.116 | 1.136  | 1.136 | -0.433 | 0.012  | 1.851 | 21 |
| 1173 | Ni2MoIn | Ni | Mo | In | 121 | 0.724  | 0.111  | 6.111 | 4.383 | 0.001 | 0.000  | 0.000 | 0.001  | 0.000  | 0.001 | 29 |
| 1061 | Ni2AgGa | Ni | Ag | Ga | 121 | 0.288  | -0.085 | 5.948 | 4.376 | 0.001 | 0.000  | 0.000 | 0.000  | 0.000  | 0.000 | 24 |
| 2022 | Ru2RhSi | Ru | Rh | Si | 121 | 0.454  | -0.088 | 6.007 | 4.372 | 0.000 | 0.000  | 0.000 | 0.000  | 0.000  | 0.000 | 29 |
| 2016 | Ru2RhBi | Ru | Rh | Bi | 121 | 0.386  | 0.470  | 6.396 | 4.369 | 0.326 | 0.307  | 0.307 | 0.212  | -0.015 | 0.811 | 30 |
| 2889 | V2ZnPb  | V  | Zn | Pb | 121 | 0.338  | 0.509  | 6.500 | 4.368 | 0.852 | 1.692  | 1.692 | 0.012  | -0.009 | 3.387 | 16 |
| 2384 | Ti2AgSb | Ti | Ag | Sb | 121 | 1.162  | -0.114 | 6.625 | 4.363 | 0.004 | 0.001  | 0.001 | 0.000  | 0.000  | 0.002 | 14 |
| 983  | Mn2ScBi | Mn | Sc | Bi | 121 | 0.469  | 0.120  | 6.642 | 4.363 | 0.683 | 3.180  | 3.180 | -0.478 | -0.055 | 5.827 | 22 |
| 1450 | Pd2NbSi | Pd | Nb | Si | xa  | -0.546 | -0.379 | 6.256 | 4.342 | 0.000 | 0.000  | 0.000 | 0.000  | 0.000  | 0.000 | 29 |
| 236  | Co2YGa  | Co | Y  | Ga | 121 | 1.006  | -0.212 | 6.196 | 4.333 | 0.006 | 0.000  | 0.000 | 0.000  | 0.000  | 0.000 | 24 |

|      |         |    |    |    |     |        |        |       |       |       |        |       |        |        |       |    |
|------|---------|----|----|----|-----|--------|--------|-------|-------|-------|--------|-------|--------|--------|-------|----|
| 1232 | Ni2RhSn | Ni | Rh | Sn | xa  | -0.201 | -0.167 | 6.063 | 4.331 | 0.000 | 0.002  | 0.000 | 0.000  | 0.000  | 0.002 | 33 |
| 1521 | Pd2TiBi | Pd | Ti | Bi | l21 | 0.083  | -0.298 | 6.640 | 4.327 | 0.010 | 0.000  | 0.000 | 0.001  | 0.000  | 0.001 | 29 |
| 120  | Co2MoSi | Co | Mo | Si | xa  | -0.215 | -0.140 | 5.768 | 4.321 | 0.000 | 0.000  | 0.001 | 0.000  | 0.000  | 0.001 | 28 |
| 238  | Co2YIn  | Co | Y  | In | l21 | 1.247  | -0.110 | 6.426 | 4.289 | 0.017 | 0.000  | 0.000 | 0.000  | 0.000  | 0.000 | 24 |
| 1077 | Ni2AuSi | Ni | Au | Si | l21 | 0.290  | -0.112 | 5.902 | 4.275 | 0.000 | 0.000  | 0.000 | 0.000  | 0.000  | 0.000 | 25 |
| 1844 | Rh2ZrPb | Rh | Zr | Pb | l21 | 1.406  | -0.461 | 6.601 | 4.263 | 0.004 | 0.001  | 0.001 | 0.000  | 0.000  | 0.002 | 26 |
| 1455 | Pd2NiBi | Pd | Ni | Bi | xa  | -0.089 | -0.058 | 6.433 | 4.262 | 0.000 | 0.000  | 0.000 | 0.000  | 0.000  | 0.000 | 35 |
| 2499 | Ti2NbB  | Ti | Nb | B  | l21 | 0.436  | 0.176  | 6.100 | 4.262 | 0.000 | 0.000  | 0.000 | 0.000  | 0.000  | 0.000 | 16 |
| 1523 | Pd2TiGe | Pd | Ti | Ge | l21 | 0.144  | -0.535 | 6.271 | 4.261 | 0.000 | 0.000  | 0.000 | 0.000  | 0.000  | 0.000 | 28 |
| 452  | Cr2ScAl | Cr | Sc | Al | xa  | -0.599 | -0.024 | 6.321 | 4.258 | 1.000 | -2.574 | 2.814 | -0.234 | 0.005  | 0.011 | 18 |
| 2632 | Ti2ZrBi | Ti | Zr | Bi | l21 | 0.408  | -0.010 | 6.811 | 4.255 | 0.000 | 0.000  | 0.000 | 0.001  | 0.000  | 0.001 | 17 |
| 2008 | Ru2PtIn | Ru | Pt | In | l21 | 0.249  | 0.192  | 6.324 | 4.242 | 0.003 | 0.001  | 0.001 | 0.000  | 0.000  | 0.002 | 29 |
| 1332 | Pd2AuAl | Pd | Au | Al | l21 | 0.214  | -0.524 | 6.299 | 4.235 | 0.000 | 0.000  | 0.000 | 0.000  | 0.000  | 0.000 | 24 |
| 1534 | Pd2VGe  | Pd | V  | Ge | xa  | -0.326 | -0.240 | 6.172 | 4.235 | 0.008 | 0.000  | 0.000 | 0.004  | 0.000  | 0.004 | 29 |
| 2018 | Ru2RhGe | Ru | Rh | Ge | l21 | 0.519  | 0.052  | 6.087 | 4.231 | 0.000 | 0.000  | 0.000 | 0.000  | 0.000  | 0.000 | 29 |
| 2406 | Ti2CdSb | Ti | Cd | Sb | l21 | 1.147  | -0.027 | 6.741 | 4.213 | 0.001 | 0.000  | 0.000 | 0.000  | 0.000  | 0.000 | 15 |
| 1303 | Ni2ZnGa | Ni | Zn | Ga | l21 | 0.662  | -0.338 | 5.787 | 4.204 | 0.000 | 0.000  | 0.000 | 0.000  | 0.000  | 0.000 | 25 |
| 1411 | Pd2IrBi | Pd | Ir | Bi | xa  | -0.424 | 0.087  | 6.532 | 4.203 | 0.000 | 0.000  | 0.000 | 0.000  | 0.000  | 0.000 | 34 |
| 1608 | Rh2CdB  | Rh | Cd | B  | l21 | 1.204  | 0.421  | 6.004 | 4.174 | 0.000 | 0.000  | 0.000 | 0.000  | 0.000  | 0.000 | 23 |
| 1312 | Ni2ZrB  | Ni | Zr | B  | xa  | -0.196 | -0.040 | 5.800 | 4.147 | 0.001 | 0.000  | 0.000 | 0.000  | 0.000  | 0.000 | 27 |
| 2645 | V2AgGe  | V  | Ag | Ge | l21 | 0.486  | 0.214  | 6.181 | 4.144 | 0.002 | 0.002  | 0.002 | 0.000  | 0.000  | 0.004 | 15 |
| 2506 | Ti2NbSi | Ti | Nb | Si | l21 | 0.588  | -0.377 | 6.325 | 4.129 | 0.001 | 0.000  | 0.000 | 0.001  | 0.000  | 0.001 | 17 |
| 1566 | Pd2ZnGa | Pd | Zn | Ga | l21 | 0.883  | -0.591 | 6.153 | 4.121 | 0.000 | 0.000  | 0.000 | 0.000  | 0.000  | 0.000 | 25 |
| 1277 | Ni2WAl  | Ni | W  | Al | l21 | 0.633  | -0.153 | 5.903 | 4.121 | 0.001 | 0.000  | 0.000 | 0.000  | 0.000  | 0.000 | 29 |
| 1555 | Pd2YGa  | Pd | Y  | Ga | l21 | 0.712  | -0.806 | 6.617 | 4.117 | 0.000 | 0.000  | 0.000 | 0.000  | 0.000  | 0.000 | 26 |
| 2245 | Sc2NiAs | Sc | Ni | As | l21 | 2.102  | -0.660 | 6.505 | 4.114 | 0.378 | 0.063  | 0.063 | 0.019  | -0.005 | 0.140 | 21 |
| 1573 | Pd2ZrAl | Pd | Zr | Al | l21 | 0.983  | -0.807 | 6.453 | 4.110 | 0.001 | 0.000  | 0.000 | 0.000  | 0.000  | 0.000 | 27 |
| 2507 | Ti2NbSn | Ti | Nb | Sn | l21 | 0.700  | -0.252 | 6.605 | 4.106 | 0.003 | 0.001  | 0.001 | -0.001 | 0.000  | 0.001 | 17 |
| 1191 | Ni2NiB  | Ni | Ni | B  | l21 | 0.000  | 0.157  | 5.327 | 4.052 | 0.002 | 0.001  | 0.001 | 0.000  | 0.000  | 0.002 | 33 |

|      |         |    |    |    |     |        |        |       |       |       |       |        |        |        |       |    |
|------|---------|----|----|----|-----|--------|--------|-------|-------|-------|-------|--------|--------|--------|-------|----|
| 416  | Cr2PdSb | Cr | Pd | Sb | xa  | -0.321 | 0.097  | 6.394 | 4.050 | 0.045 | 3.377 | -2.988 | 0.066  | 0.030  | 0.485 | 27 |
| 1169 | Ni2MoB  | Ni | Mo | B  | xa  | -1.127 | 0.138  | 5.560 | 4.047 | 0.000 | 0.000 | 0.000  | 0.000  | 0.000  | 0.000 | 29 |
| 2626 | Ti2ZnSb | Ti | Zn | Sb | l21 | 1.120  | -0.124 | 6.572 | 4.040 | 0.000 | 0.000 | 0.000  | 0.000  | 0.000  | 0.000 | 15 |
| 1399 | Pd2HfB  | Pd | Hf | B  | xa  | -0.154 | -0.057 | 6.155 | 4.039 | 0.000 | 0.000 | 0.000  | 0.000  | 0.000  | 0.000 | 27 |
| 2254 | Sc2NiSn | Sc | Ni | Sn | l21 | 1.188  | -0.474 | 6.757 | 4.030 | 0.000 | 0.000 | 0.000  | 0.000  | 0.000  | 0.000 | 20 |
| 1338 | Pd2AuPb | Pd | Au | Pb | l21 | 0.393  | -0.195 | 6.639 | 3.964 | 0.000 | 0.000 | 0.000  | 0.000  | 0.000  | 0.000 | 25 |
| 2105 | Ru2ZrGa | Ru | Zr | Ga | l21 | 1.939  | -0.539 | 6.293 | 3.956 | 0.001 | 0.000 | 0.000  | 0.000  | 0.000  | 0.000 | 23 |
| 1467 | Pd2PdGa | Pd | Pd | Ga | l21 | 0.000  | -0.455 | 6.215 | 3.944 | 0.000 | 0.000 | 0.000  | 0.000  | 0.000  | 0.000 | 33 |
| 1664 | Rh2HfBi | Rh | Hf | Bi | l21 | 1.265  | -0.402 | 6.639 | 3.943 | 0.000 | 0.000 | 0.000  | 0.000  | 0.000  | 0.000 | 27 |
| 2491 | Ti2MoGe | Ti | Mo | Ge | l21 | 0.597  | -0.351 | 6.294 | 3.939 | 0.001 | 0.000 | 0.000  | 0.001  | 0.000  | 0.001 | 18 |
| 1962 | Ru2MoGa | Ru | Mo | Ga | l21 | 1.230  | -0.137 | 6.126 | 3.925 | 0.401 | 0.032 | 0.032  | 0.284  | 0.001  | 0.349 | 25 |
| 25   | Co2CdB  | Co | Cd | B  | l21 | 0.645  | 0.713  | 5.690 | 3.916 | 0.003 | 0.002 | 0.002  | 0.000  | 0.000  | 0.004 | 23 |
| 1508 | Pd2ScAs | Pd | Sc | As | l21 | 0.177  | -0.739 | 6.441 | 3.914 | 0.000 | 0.000 | 0.000  | 0.000  | 0.000  | 0.000 | 28 |
| 1299 | Ni2ZnAl | Ni | Zn | Al | l21 | 0.689  | -0.448 | 5.772 | 3.889 | 0.000 | 0.000 | 0.000  | 0.000  | 0.000  | 0.000 | 25 |
| 1846 | Rh2ZrSi | Rh | Zr | Si | l21 | 1.364  | -0.753 | 6.276 | 3.848 | 0.003 | 0.003 | 0.003  | 0.000  | 0.000  | 0.006 | 26 |
| 1072 | Ni2AuGa | Ni | Au | Ga | l21 | 0.266  | -0.181 | 5.978 | 3.842 | 0.000 | 0.000 | 0.000  | 0.000  | 0.000  | 0.000 | 24 |
| 1262 | Ni2TiPb | Ni | Ti | Pb | l21 | 0.726  | -0.115 | 6.207 | 3.833 | 0.000 | 0.000 | 0.000  | 0.000  | 0.000  | 0.000 | 28 |
| 1059 | Ni2AgB  | Ni | Ag | B  | l21 | 0.082  | 0.578  | 5.654 | 3.818 | 0.001 | 0.000 | 0.000  | 0.000  | 0.000  | 0.000 | 24 |
| 1845 | Rh2ZrSb | Rh | Zr | Sb | l21 | 1.156  | -0.626 | 6.536 | 3.779 | 0.000 | 0.000 | 0.000  | 0.000  | 0.000  | 0.000 | 27 |
| 1400 | Pd2HfBi | Pd | Hf | Bi | l21 | 0.493  | -0.414 | 6.768 | 3.776 | 0.000 | 0.000 | 0.000  | 0.000  | 0.000  | 0.000 | 29 |
| 1810 | Rh2WIn  | Rh | W  | In | l21 | 0.838  | 0.056  | 6.362 | 3.776 | 0.001 | 0.000 | 0.000  | 0.000  | 0.000  | 0.000 | 27 |
| 915  | Mn2NbAs | Mn | Nb | As | l21 | 0.497  | -0.149 | 5.934 | 3.776 | 0.002 | 0.000 | 0.000  | 0.000  | 0.000  | 0.000 | 24 |
| 1291 | Ni2YBi  | Ni | Y  | Bi | l21 | 1.204  | -0.281 | 6.600 | 3.742 | 0.000 | 0.000 | 0.000  | 0.000  | 0.000  | 0.000 | 28 |
| 2502 | Ti2NbGe | Ti | Nb | Ge | l21 | 0.660  | -0.332 | 6.390 | 3.737 | 0.003 | 0.001 | 0.001  | -0.001 | 0.000  | 0.001 | 17 |
| 1410 | Pd2IrB  | Pd | Ir | B  | xa  | -0.979 | 0.537  | 5.947 | 3.691 | 0.000 | 0.000 | 0.000  | 0.001  | 0.000  | 0.001 | 32 |
| 2342 | Sc2WSn  | Sc | W  | Sn | l21 | 0.587  | -0.060 | 6.826 | 3.664 | 0.000 | 0.000 | 0.000  | 0.000  | 0.000  | 0.000 | 16 |
| 1337 | Pd2AuIn | Pd | Au | In | l21 | 0.314  | -0.435 | 6.488 | 3.650 | 0.000 | 0.000 | 0.000  | 0.000  | 0.000  | 0.000 | 24 |
| 2303 | Sc2ScGa | Sc | Sc | Ga | l21 | 0.000  | -0.173 | 6.984 | 3.636 | 0.548 | 0.250 | 0.250  | 0.408  | -0.019 | 0.889 | 12 |
| 1302 | Ni2ZnBi | Ni | Zn | Bi | l21 | 0.707  | 0.112  | 6.258 | 3.634 | 0.001 | 0.000 | 0.000  | 0.000  | 0.000  | 0.000 | 27 |





|      |         |    |    |    |     |        |        |       |       |       |       |        |        |        |       |    |
|------|---------|----|----|----|-----|--------|--------|-------|-------|-------|-------|--------|--------|--------|-------|----|
| 1319 | Ni2ZrSi | Ni | Zr | Si | l21 | 0.782  | -0.582 | 6.013 | 2.924 | 0.000 | 0.000 | 0.000  | 0.000  | 0.000  | 0.000 | 28 |
| 1698 | Rh2MoGa | Rh | Mo | Ga | l21 | 0.229  | -0.148 | 6.171 | 2.923 | 0.008 | 0.002 | 0.002  | 0.004  | 0.000  | 0.008 | 27 |
| 1217 | Ni2PtIn | Ni | Pt | In | l21 | 0.213  | -0.190 | 6.095 | 2.902 | 0.001 | 0.000 | 0.000  | 0.000  | 0.000  | 0.000 | 33 |
| 1666 | Rh2HfGe | Rh | Hf | Ge | l21 | 1.340  | -0.711 | 6.316 | 2.892 | 0.008 | 0.001 | 0.001  | 0.000  | 0.000  | 0.002 | 26 |
| 194  | Co2ScIn | Co | Sc | In | l21 | 1.444  | -0.246 | 6.206 | 2.892 | 0.062 | 0.003 | 0.003  | -0.001 | 0.000  | 0.005 | 24 |
| 1814 | Rh2WSn  | Rh | W  | Sn | l21 | 0.121  | 0.109  | 6.374 | 2.883 | 0.001 | 0.000 | 0.000  | 0.001  | 0.000  | 0.001 | 28 |
| 1648 | Rh2CuSi | Rh | Cu | Si | l21 | 1.697  | -0.528 | 5.885 | 2.869 | 0.001 | 0.000 | 0.000  | 0.000  | 0.000  | 0.000 | 23 |
| 1462 | Pd2NiSn | Pd | Ni | Sn | l21 | 0.084  | -0.328 | 6.264 | 2.858 | 0.000 | 0.000 | 0.000  | 0.000  | 0.000  | 0.000 | 34 |
| 1403 | Pd2HfIn | Pd | Hf | In | l21 | 1.153  | -0.708 | 6.587 | 2.850 | 0.000 | 0.000 | 0.000  | 0.000  | 0.000  | 0.000 | 27 |
| 2888 | V2ZnIn  | V  | Zn | In | xa  | -0.033 | 0.321  | 6.372 | 2.831 | 0.126 | 1.420 | -1.380 | 0.014  | -0.037 | 0.017 | 15 |
| 1301 | Ni2ZnB  | Ni | Zn | B  | l21 | 0.690  | 0.128  | 5.430 | 2.818 | 0.001 | 0.000 | 0.000  | 0.000  | 0.000  | 0.000 | 25 |
| 2454 | Ti2HfAs | Ti | Hf | As | l21 | 0.217  | -0.165 | 6.461 | 2.813 | 0.005 | 0.001 | 0.001  | 0.001  | 0.000  | 0.003 | 17 |
| 1590 | Rh2AgIn | Rh | Ag | In | l21 | 0.472  | -0.095 | 6.390 | 2.798 | 0.000 | 0.000 | 0.000  | 0.000  | 0.000  | 0.000 | 22 |
| 2338 | Sc2WIn  | Sc | W  | In | l21 | 0.699  | 0.055  | 6.853 | 2.791 | 0.002 | 0.000 | 0.000  | 0.001  | 0.000  | 0.001 | 15 |
| 1580 | Pd2ZrPb | Pd | Zr | Pb | l21 | 0.594  | -0.505 | 6.716 | 2.787 | 0.000 | 0.000 | 0.000  | 0.000  | 0.000  | 0.000 | 28 |
| 1258 | Ni2TiBi | Ni | Ti | Bi | l21 | 0.535  | -0.057 | 6.274 | 2.783 | 0.000 | 0.000 | 0.000  | 0.000  | 0.000  | 0.000 | 29 |
| 1557 | Pd2YIn  | Pd | Y  | In | l21 | 1.103  | -0.842 | 6.792 | 2.780 | 0.001 | 0.000 | 0.000  | 0.000  | 0.000  | 0.000 | 26 |
| 2288 | Sc2RuAl | Sc | Ru | Al | l21 | 0.360  | -0.509 | 6.589 | 2.773 | 0.000 | 0.000 | 0.000  | 0.001  | 0.000  | 0.001 | 17 |
| 1525 | Pd2TiPb | Pd | Ti | Pb | l21 | 0.329  | -0.341 | 6.556 | 2.745 | 0.000 | 0.000 | 0.000  | 0.000  | 0.000  | 0.000 | 28 |
| 2496 | Ti2MoSn | Ti | Mo | Sn | l21 | 0.575  | -0.225 | 6.508 | 2.733 | 0.001 | 0.000 | 0.000  | 0.001  | 0.000  | 0.001 | 18 |
| 1430 | Pd2MoAl | Pd | Mo | Al | xa  | -0.122 | -0.185 | 6.224 | 2.725 | 0.000 | 0.000 | 0.000  | 0.000  | 0.000  | 0.000 | 29 |
| 1079 | Ni2CdAl | Ni | Cd | Al | l21 | 0.688  | -0.210 | 6.022 | 2.714 | 0.000 | 0.000 | 0.000  | 0.000  | 0.000  | 0.000 | 25 |
| 1441 | Pd2NbAl | Pd | Nb | Al | l21 | 0.303  | -0.467 | 6.349 | 2.705 | 0.001 | 0.000 | 0.000  | 0.000  | 0.000  | 0.000 | 28 |
| 2652 | V2AuAs  | V  | Au | As | l21 | 1.329  | 0.009  | 6.212 | 2.704 | 0.000 | 0.000 | 0.000  | 0.000  | 0.000  | 0.000 | 16 |
| 2260 | Sc2PdGe | Sc | Pd | Ge | l21 | 1.648  | -0.815 | 6.675 | 2.689 | 0.001 | 0.000 | 0.000  | 0.000  | 0.000  | 0.000 | 20 |
| 1122 | Ni2CuSn | Ni | Cu | Sn | l21 | 0.337  | -0.133 | 5.967 | 2.682 | 0.001 | 0.000 | 0.000  | 0.000  | 0.000  | 0.000 | 25 |
| 2398 | Ti2CdAl | Ti | Cd | Al | l21 | 0.654  | -0.074 | 6.549 | 2.677 | 0.004 | 0.001 | 0.001  | 0.000  | 0.000  | 0.002 | 13 |
| 2279 | Sc2RhB  | Sc | Rh | B  | l21 | 0.599  | -0.335 | 6.277 | 2.675 | 0.000 | 0.000 | 0.000  | 0.000  | 0.000  | 0.000 | 18 |
| 269  | Cr2AgGa | Cr | Ag | Ga | xa  | -0.358 | 0.265  | 6.250 | 2.662 | 0.071 | 3.222 | -2.996 | 0.062  | -0.020 | 0.268 | 16 |







|      |         |    |    |    |     |        |        |       |       |       |        |        |        |        |       |    |
|------|---------|----|----|----|-----|--------|--------|-------|-------|-------|--------|--------|--------|--------|-------|----|
| 1183 | Ni2NbGe | Ni | Nb | Ge | 121 | 0.121  | -0.220 | 5.994 | 2.019 | 0.000 | 0.000  | 0.000  | 0.000  | 0.000  | 0.000 | 29 |
| 1294 | Ni2YIn  | Ni | Y  | In | 121 | 1.318  | -0.385 | 6.487 | 2.011 | 0.002 | 0.000  | 0.000  | 0.000  | 0.000  | 0.000 | 26 |
| 2520 | Ti2PdAs | Ti | Pd | As | 121 | 1.396  | -0.539 | 6.328 | 1.988 | 0.002 | 0.001  | 0.001  | 0.000  | 0.000  | 0.002 | 23 |
| 1464 | Pd2PdAs | Pd | Pd | As | 121 | 0.000  | -0.194 | 6.285 | 1.978 | 0.000 | 0.000  | 0.000  | 0.000  | 0.000  | 0.000 | 35 |
| 1250 | Ni2ScIn | Ni | Sc | In | 121 | 1.121  | -0.459 | 6.268 | 1.964 | 0.003 | 0.000  | 0.000  | 0.000  | 0.000  | 0.000 | 26 |
| 1859 | Ru2AuAl | Ru | Au | Al | 121 | 0.213  | 0.052  | 6.192 | 1.959 | 0.003 | 0.001  | 0.001  | 0.000  | 0.000  | 0.002 | 20 |
| 1315 | Ni2ZrGe | Ni | Zr | Ge | 121 | 0.687  | -0.508 | 6.094 | 1.941 | 0.000 | 0.000  | 0.000  | 0.000  | 0.000  | 0.000 | 28 |
| 1515 | Pd2ScSb | Pd | Sc | Sb | 121 | 0.631  | -0.816 | 6.609 | 1.917 | 0.000 | 0.000  | 0.000  | 0.000  | 0.000  | 0.000 | 28 |
| 1801 | Rh2VSb  | Rh | V  | Sb | 121 | 0.059  | -0.128 | 6.292 | 1.909 | 0.002 | 0.000  | 0.000  | 0.001  | 0.000  | 0.001 | 28 |
| 293  | Cr2CdIn | Cr | Cd | In | xa  | -0.160 | 0.388  | 6.634 | 1.905 | 0.035 | 3.458  | -3.395 | 0.028  | -0.066 | 0.025 | 17 |
| 420  | Cr2PtAs | Cr | Pt | As | 121 | 0.075  | 0.112  | 6.007 | 1.896 | 0.120 | 0.395  | 0.395  | -0.029 | -0.025 | 0.736 | 27 |
| 2498 | Ti2NbAs | Ti | Nb | As | 121 | 0.604  | -0.310 | 6.360 | 1.893 | 0.000 | 0.000  | 0.000  | 0.001  | 0.000  | 0.001 | 18 |
| 1215 | Ni2PtGa | Ni | Pt | Ga | xa  | -0.144 | -0.323 | 5.897 | 1.893 | 0.000 | 0.001  | 0.000  | 0.000  | 0.000  | 0.001 | 33 |
| 1142 | Ni2HfSb | Ni | Hf | Sb | 121 | 1.144  | -0.382 | 6.277 | 1.885 | 0.000 | 0.000  | 0.000  | 0.000  | 0.000  | 0.000 | 29 |
| 1728 | Rh2PdAs | Rh | Pd | As | 121 | 0.467  | -0.089 | 6.164 | 1.882 | 0.000 | 0.000  | 0.000  | 0.000  | 0.000  | 0.000 | 33 |
| 2243 | Sc2NbSn | Sc | Nb | Sn | 121 | 0.300  | -0.185 | 6.950 | 1.881 | 0.149 | 0.008  | 0.008  | 0.102  | -0.004 | 0.114 | 15 |
| 1189 | Ni2NiAl | Ni | Ni | Al | 121 | 0.000  | -0.377 | 5.654 | 1.878 | 0.002 | 0.000  | 0.000  | 0.000  | 0.000  | 0.000 | 33 |
| 2278 | Sc2RhAs | Sc | Rh | As | 121 | 1.586  | -0.868 | 6.597 | 1.856 | 0.000 | 0.000  | 0.000  | 0.000  | 0.000  | 0.000 | 20 |
| 2317 | Sc2TiPb | Sc | Ti | Pb | 121 | 0.404  | -0.077 | 7.096 | 1.835 | 0.047 | 0.365  | 0.365  | 1.616  | -0.077 | 2.269 | 14 |
| 1868 | Ru2AuSi | Ru | Au | Si | 121 | 1.050  | 0.106  | 6.131 | 1.827 | 0.000 | 0.000  | 0.000  | 0.000  | 0.000  | 0.000 | 21 |
| 2066 | Ru2VSi  | Ru | V  | Si | 121 | 1.866  | -0.530 | 5.920 | 1.822 | 0.001 | 0.000  | 0.000  | 0.003  | 0.000  | 0.003 | 25 |
| 1214 | Ni2PtBi | Ni | Pt | Bi | 121 | 0.418  | 0.075  | 6.265 | 1.808 | 0.000 | 0.000  | 0.000  | 0.000  | 0.000  | 0.000 | 35 |
| 1342 | Pd2CdAl | Pd | Cd | Al | 121 | 0.817  | -0.574 | 6.353 | 1.808 | 0.000 | 0.000  | 0.000  | 0.000  | 0.000  | 0.000 | 25 |
| 2396 | Ti2AuSi | Ti | Au | Si | 121 | 1.406  | -0.356 | 6.377 | 1.805 | 0.003 | 0.000  | 0.000  | 0.000  | 0.000  | 0.000 | 13 |
| 2835 | V2ScSb  | V  | Sc | Sb | xa  | -0.507 | -0.085 | 6.528 | 1.802 | 1.000 | -1.380 | 1.690  | -0.288 | -0.005 | 0.017 | 18 |
| 1438 | Pd2MoSb | Pd | Mo | Sb | xa  | -0.692 | -0.035 | 6.447 | 1.797 | 0.000 | 0.000  | 0.000  | 0.000  | 0.000  | 0.000 | 31 |
| 1909 | Ru2CuIn | Ru | Cu | In | xa  | -0.246 | 0.278  | 6.222 | 1.795 | 0.002 | 0.001  | 0.001  | 0.000  | 0.000  | 0.002 | 20 |
| 2619 | Ti2ZnAs | Ti | Zn | As | 121 | 1.580  | -0.283 | 6.326 | 1.786 | 0.002 | 0.000  | 0.000  | 0.000  | 0.000  | 0.000 | 15 |
| 2340 | Sc2WSb  | Sc | W  | Sb | 121 | 0.623  | -0.076 | 6.801 | 1.769 | 0.000 | 0.001  | 0.001  | -0.002 | 0.000  | 0.000 | 17 |





|      |         |    |    |    |     |        |        |       |       |       |        |        |        |        |       |    |
|------|---------|----|----|----|-----|--------|--------|-------|-------|-------|--------|--------|--------|--------|-------|----|
| 2228 | Sc2MoIn | Sc | Mo | In | I21 | 0.654  | -0.079 | 6.854 | 1.303 | 0.013 | -0.001 | -0.001 | 0.005  | 0.000  | 0.003 | 15 |
| 188  | Co2ScAl | Co | Sc | Al | I21 | 1.798  | -0.502 | 5.963 | 1.301 | 0.003 | 0.000  | 0.000  | 0.000  | 0.000  | 0.000 | 24 |
| 2636 | Ti2ZrPb | Ti | Zr | Pb | I21 | 0.198  | 0.031  | 6.810 | 1.295 | 0.001 | 0.000  | 0.000  | 0.001  | 0.000  | 0.001 | 16 |
| 1235 | Ni2RuB  | Ni | Ru | B  | xa  | -1.381 | 0.223  | 5.493 | 1.288 | 0.000 | 0.000  | 0.000  | 0.000  | 0.000  | 0.000 | 31 |
| 245  | Co2ZnB  | Co | Zn | B  | I21 | 1.006  | 0.168  | 5.378 | 1.286 | 0.000 | 0.000  | 0.000  | 0.000  | 0.000  | 0.000 | 23 |
| 1187 | Ni2NbSi | Ni | Nb | Si | I21 | 0.110  | -0.334 | 5.911 | 1.269 | 0.000 | 0.000  | 0.000  | 0.000  | 0.000  | 0.000 | 29 |
| 1493 | Pd2RhSb | Pd | Rh | Sb | xa  | -0.489 | -0.295 | 6.370 | 1.268 | 0.000 | 0.000  | 0.000  | 0.000  | 0.000  | 0.000 | 34 |
| 2486 | Ti2MoAl | Ti | Mo | Al | I21 | 0.703  | -0.307 | 6.353 | 1.264 | 0.001 | 0.001  | 0.001  | -0.001 | 0.000  | 0.001 | 17 |
| 1320 | Ni2ZrSn | Ni | Zr | Sn | I21 | 1.360  | -0.505 | 6.299 | 1.256 | 0.000 | 0.000  | 0.000  | 0.000  | 0.000  | 0.000 | 28 |
| 417  | Cr2PdSi | Cr | Pd | Si | xa  | -0.750 | -0.103 | 5.923 | 1.255 | 0.844 | 2.671  | -1.099 | 0.299  | 0.011  | 1.882 | 26 |
| 1782 | Rh2TiAl | Rh | Ti | Al | I21 | 2.206  | -0.971 | 6.111 | 1.243 | 0.002 | 0.000  | 0.000  | 0.000  | 0.000  | 0.000 | 25 |
| 2284 | Sc2RhPb | Sc | Rh | Pb | I21 | 0.610  | -0.510 | 6.886 | 1.238 | 0.001 | 0.000  | 0.000  | 0.000  | 0.000  | 0.000 | 19 |
| 2051 | Ru2TiGe | Ru | Ti | Ge | I21 | 2.404  | -0.674 | 6.080 | 1.233 | 0.002 | 0.000  | 0.000  | 0.000  | 0.000  | 0.000 | 24 |
| 1595 | Rh2AuAl | Rh | Au | Al | I21 | 0.524  | -0.340 | 6.214 | 1.233 | 0.000 | 0.000  | 0.000  | 0.000  | 0.000  | 0.000 | 22 |
| 1087 | Ni2CdSb | Ni | Cd | Sb | I21 | 1.129  | 0.022  | 6.303 | 1.230 | 0.002 | 0.000  | 0.000  | 0.000  | 0.000  | 0.000 | 27 |
| 2492 | Ti2MoIn | Ti | Mo | In | I21 | 0.859  | -0.127 | 6.525 | 1.223 | 0.002 | 0.001  | 0.001  | -0.001 | 0.000  | 0.001 | 17 |
| 2282 | Sc2RhGe | Sc | Rh | Ge | I21 | 0.848  | -0.793 | 6.593 | 1.220 | 0.000 | 0.000  | 0.000  | 0.000  | 0.000  | 0.000 | 19 |
| 1256 | Ni2TiAs | Ni | Ti | As | I21 | 0.010  | -0.353 | 5.911 | 1.219 | 0.000 | 0.000  | 0.000  | 0.000  | 0.000  | 0.000 | 29 |
| 1864 | Ru2AuGe | Ru | Au | Ge | I21 | 0.935  | 0.213  | 6.214 | 1.217 | 0.000 | 0.000  | 0.000  | 0.000  | 0.000  | 0.000 | 21 |
| 1570 | Pd2ZnSb | Pd | Zn | Sb | I21 | 0.607  | -0.385 | 6.454 | 1.203 | 0.000 | 0.000  | 0.000  | 0.000  | 0.000  | 0.000 | 27 |
| 2440 | Ti2CuSi | Ti | Cu | Si | I21 | 1.589  | -0.353 | 6.140 | 1.196 | 0.045 | 0.033  | 0.033  | 0.001  | -0.001 | 0.066 | 13 |
| 2261 | Sc2PdIn | Sc | Pd | In | I21 | 0.605  | -0.619 | 6.896 | 1.181 | 0.000 | 0.000  | 0.000  | 0.000  | 0.000  | 0.000 | 19 |
| 1835 | Rh2ZnSi | Rh | Zn | Si | I21 | 2.065  | -0.630 | 5.946 | 1.180 | 0.004 | 0.000  | 0.000  | 0.000  | 0.000  | 0.000 | 24 |
| 380  | Cr2MoGe | Cr | Mo | Ge | I21 | 0.301  | 0.056  | 5.978 | 1.173 | 0.776 | 1.272  | 1.272  | -0.545 | -0.038 | 1.961 | 22 |
| 1473 | Pd2PdSn | Pd | Pd | Sn | I21 | 0.000  | -0.463 | 6.402 | 1.161 | 0.000 | 0.000  | 0.000  | 0.000  | 0.000  | 0.000 | 34 |
| 1423 | Pd2MnGa | Pd | Mn | Ga | I21 | 0.664  | -0.505 | 6.177 | 1.158 | 0.155 | 0.127  | 0.127  | 3.830  | -0.056 | 4.028 | 30 |
| 2053 | Ru2TiPb | Ru | Ti | Pb | I21 | 2.007  | -0.172 | 6.379 | 1.156 | 0.002 | 0.000  | 0.000  | 0.000  | 0.000  | 0.000 | 24 |
| 2292 | Sc2RuGa | Sc | Ru | Ga | I21 | 0.615  | -0.579 | 6.558 | 1.155 | 0.000 | 0.000  | 0.000  | 0.001  | 0.000  | 0.001 | 17 |
| 1452 | Pd2NiAl | Pd | Ni | Al | I21 | 0.416  | -0.542 | 6.019 | 1.141 | 0.001 | 0.000  | 0.000  | 0.001  | 0.000  | 0.001 | 33 |



|      |         |    |    |    |     |        |        |       |       |       |        |       |        |        |       |    |
|------|---------|----|----|----|-----|--------|--------|-------|-------|-------|--------|-------|--------|--------|-------|----|
| 1520 | Pd2TiB  | Pd | Ti | B  | l21 | 0.139  | 0.000  | 5.962 | 0.969 | 0.000 | 0.000  | 0.000 | 0.000  | 0.000  | 0.000 | 27 |
| 1115 | Ni2CuBi | Ni | Cu | Bi | l21 | 0.341  | 0.173  | 6.149 | 0.960 | 0.001 | 0.000  | 0.000 | 0.000  | 0.000  | 0.000 | 26 |
| 1832 | Rh2ZnIn | Rh | Zn | In | l21 | 1.375  | -0.445 | 6.258 | 0.958 | 0.000 | 0.000  | 0.000 | 0.000  | 0.000  | 0.000 | 23 |
| 2360 | Sc2ZnIn | Sc | Zn | In | l21 | 1.605  | -0.407 | 6.937 | 0.958 | 0.046 | 0.013  | 0.013 | 0.001  | 0.000  | 0.027 | 11 |
| 2422 | Ti2CrB  | Ti | Cr | B  | l21 | 0.739  | -0.006 | 5.822 | 0.924 | 0.002 | 0.001  | 0.001 | -0.002 | 0.000  | 0.000 | 17 |
| 224  | Co2WBi  | Co | W  | Bi | l21 | 0.374  | 0.747  | 6.228 | 0.923 | 0.002 | 0.000  | 0.000 | 0.001  | 0.000  | 0.001 | 29 |
| 1646 | Rh2CuPb | Rh | Cu | Pb | l21 | 0.895  | -0.018 | 6.301 | 0.922 | 0.000 | 0.000  | 0.000 | 0.000  | 0.000  | 0.000 | 23 |
| 1195 | Ni2NiIn | Ni | Ni | In | l21 | 0.001  | -0.046 | 5.922 | 0.917 | 0.001 | 0.000  | 0.000 | 0.001  | 0.000  | 0.001 | 33 |
| 2844 | V2TiIn  | V  | Ti | In | xa  | -0.486 | 0.086  | 6.411 | 0.916 | 0.159 | -0.666 | 1.590 | -0.448 | 0.020  | 0.496 | 17 |
| 922  | Mn2NbSb | Mn | Nb | Sb | l21 | 0.740  | -0.086 | 6.149 | 0.911 | 0.001 | 0.000  | 0.000 | 0.000  | 0.000  | 0.000 | 24 |
| 738  | Fe2VAl  | Fe | V  | Al | l21 | 1.463  | -0.428 | 5.694 | 0.899 | 0.002 | 0.000  | 0.000 | 0.000  | 0.000  | 0.000 | 24 |
| 1350 | Pd2CdSb | Pd | Cd | Sb | l21 | 0.748  | -0.358 | 6.636 | 0.883 | 0.000 | 0.000  | 0.000 | 0.000  | 0.000  | 0.000 | 27 |
| 1341 | Pd2AuSn | Pd | Au | Sn | l21 | 0.323  | -0.379 | 6.503 | 0.876 | 0.000 | 0.000  | 0.000 | 0.000  | 0.000  | 0.000 | 25 |
| 2354 | Sc2ZnAl | Sc | Zn | Al | l21 | 1.646  | -0.422 | 6.745 | 0.875 | 0.002 | 0.001  | 0.001 | 0.000  | 0.000  | 0.002 | 11 |
| 1069 | Ni2AuAs | Ni | Au | As | l21 | 0.557  | 0.038  | 6.055 | 0.869 | 0.000 | 0.000  | 0.000 | 0.000  | 0.000  | 0.000 | 26 |
| 1137 | Ni2HfBi | Ni | Hf | Bi | l21 | 1.136  | -0.132 | 6.429 | 0.868 | 0.002 | 0.000  | 0.000 | 0.000  | 0.000  | 0.000 | 29 |
| 2355 | Sc2ZnAs | Sc | Zn | As | l21 | 2.171  | -0.563 | 6.708 | 0.865 | 0.003 | 0.000  | 0.000 | 0.000  | 0.000  | 0.000 | 13 |
| 1117 | Ni2CuGe | Ni | Cu | Ge | l21 | 0.399  | -0.190 | 5.728 | 0.858 | 0.000 | 0.000  | 0.000 | 0.000  | 0.000  | 0.000 | 25 |
| 1266 | Ni2VAl  | Ni | V  | Al | l21 | 0.527  | -0.390 | 5.786 | 0.856 | 0.088 | 0.007  | 0.007 | 0.039  | -0.001 | 0.052 | 28 |
| 1253 | Ni2ScSi | Ni | Sc | Si | l21 | 1.028  | -0.634 | 5.919 | 0.823 | 0.000 | 0.000  | 0.000 | 0.000  | 0.000  | 0.000 | 27 |
| 1575 | Pd2ZrB  | Pd | Zr | B  | xa  | -0.282 | -0.062 | 6.186 | 0.817 | 0.000 | 0.000  | 0.000 | 0.000  | 0.000  | 0.000 | 27 |
| 1060 | Ni2AgBi | Ni | Ag | Bi | l21 | 0.639  | 0.190  | 6.352 | 0.816 | 0.001 | 0.000  | 0.000 | 0.000  | 0.000  | 0.000 | 26 |
| 740  | Fe2VB   | Fe | V  | B  | l21 | 0.876  | -0.176 | 5.356 | 0.812 | 0.001 | 0.000  | 0.000 | 0.000  | 0.000  | 0.000 | 24 |
| 1730 | Rh2PdBi | Rh | Pd | Bi | l21 | 0.423  | -0.013 | 6.442 | 0.810 | 0.000 | 0.000  | 0.000 | 0.000  | 0.000  | 0.000 | 33 |
| 2087 | Ru2YSb  | Ru | Y  | Sb | l21 | 2.250  | -0.390 | 6.574 | 0.805 | 0.001 | 0.000  | 0.000 | 0.000  | 0.000  | 0.000 | 24 |
| 2339 | Sc2WPb  | Sc | W  | Pb | l21 | 0.802  | 0.140  | 6.897 | 0.803 | 0.000 | 0.000  | 0.000 | 0.001  | 0.000  | 0.001 | 16 |
| 2108 | Ru2ZrPb | Ru | Zr | Pb | l21 | 2.298  | -0.239 | 6.546 | 0.800 | 0.010 | 0.000  | 0.000 | 0.000  | 0.000  | 0.000 | 24 |
| 1517 | Pd2ScSn | Pd | Sc | Sn | l21 | 0.932  | -0.868 | 6.580 | 0.796 | 0.000 | 0.000  | 0.000 | 0.000  | 0.000  | 0.000 | 27 |
| 1539 | Pd2VSn  | Pd | V  | Sn | l21 | 0.076  | -0.214 | 6.384 | 0.785 | 0.000 | 0.000  | 0.000 | 0.001  | 0.000  | 0.001 | 29 |

|      |         |    |    |    |     |        |        |       |       |       |       |        |        |        |       |    |
|------|---------|----|----|----|-----|--------|--------|-------|-------|-------|-------|--------|--------|--------|-------|----|
| 2056 | Ru2TiSn | Ru | Ti | Sn | l21 | 2.424  | -0.553 | 6.290 | 0.784 | 0.009 | 0.000 | 0.000  | 0.000  | 0.000  | 0.000 | 24 |
| 2127 | Sc2AuGa | Sc | Au | Ga | l21 | 1.600  | -0.695 | 6.795 | 0.778 | 0.000 | 0.000 | 0.000  | 0.000  | 0.000  | 0.000 | 10 |
| 1775 | Rh2ScGa | Rh | Sc | Ga | l21 | 1.979  | -0.967 | 6.227 | 0.777 | 0.004 | 0.000 | 0.000  | 0.000  | 0.000  | 0.000 | 24 |
| 2036 | Ru2ScAs | Ru | Sc | As | l21 | 1.839  | -0.501 | 6.187 | 0.772 | 0.001 | 0.000 | 0.000  | 0.000  | 0.000  | 0.000 | 24 |
| 2606 | Ti2WSn  | Ti | W  | Sn | l21 | 0.800  | -0.139 | 6.510 | 0.767 | 0.001 | 0.001 | 0.001  | -0.001 | 0.000  | 0.001 | 18 |
| 2373 | Sc2ZrSb | Sc | Zr | Sb | l21 | 0.165  | -0.269 | 7.049 | 0.766 | 0.005 | 0.000 | 0.000  | 0.000  | 0.000  | 0.000 | 15 |
| 1984 | Ru2NiGa | Ru | Ni | Ga | l21 | 0.392  | -0.044 | 5.936 | 0.766 | 0.003 | 0.002 | 0.002  | 0.001  | 0.000  | 0.005 | 29 |
| 1086 | Ni2CdPb | Ni | Cd | Pb | l21 | 0.912  | 0.178  | 6.393 | 0.761 | 0.001 | 0.000 | 0.000  | 0.000  | 0.000  | 0.000 | 26 |
| 1564 | Pd2ZnB  | Pd | Zn | B  | l21 | 1.082  | 0.128  | 5.854 | 0.741 | 0.000 | 0.000 | 0.000  | 0.000  | 0.000  | 0.000 | 25 |
| 1704 | Rh2MoSn | Rh | Mo | Sn | xa  | -0.109 | -0.002 | 6.346 | 0.735 | 0.000 | 0.000 | 0.000  | 0.000  | 0.000  | 0.000 | 28 |
| 229  | Co2WSb  | Co | W  | Sb | l21 | 0.226  | 0.395  | 6.080 | 0.718 | 0.002 | 0.000 | 0.000  | 0.000  | 0.000  | 0.000 | 29 |
| 1640 | Rh2CuAs | Rh | Cu | As | l21 | 1.091  | -0.193 | 6.023 | 0.717 | 0.000 | 0.000 | 0.000  | 0.000  | 0.000  | 0.000 | 24 |
| 913  | Mn2MoSn | Mn | Mo | Sn | l21 | 0.217  | 0.097  | 6.086 | 0.716 | 0.016 | 0.001 | 0.001  | -0.001 | 0.000  | 0.001 | 24 |
| 1185 | Ni2NbPb | Ni | Nb | Pb | l21 | 0.745  | 0.125  | 6.287 | 0.715 | 0.000 | 0.000 | 0.000  | 0.000  | 0.000  | 0.000 | 29 |
| 2853 | V2VGa   | V  | V  | Ga | l21 | 0.001  | -0.104 | 6.025 | 0.711 | 0.012 | 0.002 | 0.002  | -0.003 | 0.000  | 0.001 | 18 |
| 1255 | Ni2TiAl | Ni | Ti | Al | l21 | 1.065  | -0.623 | 5.884 | 0.708 | 0.000 | 0.000 | 0.000  | 0.000  | 0.000  | 0.000 | 27 |
| 1166 | Ni2MnSn | Ni | Mn | Sn | l21 | 0.593  | -0.201 | 6.036 | 0.702 | 0.264 | 0.245 | 0.245  | 3.566  | -0.074 | 3.982 | 31 |
| 1313 | Ni2ZrBi | Ni | Zr | Bi | l21 | 1.005  | -0.176 | 6.450 | 0.700 | 0.000 | 0.000 | 0.000  | 0.000  | 0.000  | 0.000 | 29 |
| 620  | Fe2IrBi | Fe | Ir | Bi | l21 | 0.319  | 0.489  | 6.325 | 0.688 | 0.784 | 2.523 | 2.523  | 0.617  | -0.083 | 5.580 | 30 |
| 1407 | Pd2HfSn | Pd | Hf | Sn | l21 | 0.905  | -0.698 | 6.596 | 0.686 | 0.000 | 0.000 | 0.000  | 0.000  | 0.000  | 0.000 | 28 |
| 2421 | Ti2CrAs | Ti | Cr | As | l21 | 0.246  | -0.223 | 6.132 | 0.686 | 0.002 | 0.001 | 0.001  | -0.001 | 0.000  | 0.001 | 19 |
| 1323 | Pd2AgB  | Pd | Ag | B  | l21 | 0.430  | 0.488  | 6.032 | 0.686 | 0.000 | 0.000 | 0.000  | 0.000  | 0.000  | 0.000 | 24 |
| 923  | Mn2NbSi | Mn | Nb | Si | l21 | 1.157  | -0.424 | 5.877 | 0.677 | 0.931 | 0.598 | 0.598  | -0.191 | -0.019 | 0.986 | 23 |
| 1344 | Pd2CdB  | Pd | Cd | B  | l21 | 0.483  | 0.410  | 6.124 | 0.672 | 0.000 | 0.000 | 0.000  | 0.000  | 0.000  | 0.000 | 25 |
| 1272 | Ni2VIn  | Ni | V  | In | l21 | 0.632  | -0.068 | 6.027 | 0.671 | 0.000 | 0.000 | 0.000  | 0.000  | 0.000  | 0.000 | 28 |
| 2006 | Ru2PtGa | Ru | Pt | Ga | l21 | 0.424  | -0.017 | 6.139 | 0.666 | 0.001 | 0.001 | 0.001  | 0.001  | 0.000  | 0.003 | 29 |
| 972  | Mn2RuBi | Mn | Ru | Bi | xa  | -0.497 | 0.298  | 6.401 | 0.659 | 0.451 | 3.526 | -3.252 | -0.006 | 0.040  | 0.308 | 27 |
| 1690 | Rh2MnPb | Rh | Mn | Pb | l21 | 1.199  | -0.135 | 6.380 | 0.659 | 0.402 | 0.420 | 0.420  | 3.842  | -0.032 | 4.650 | 29 |
| 2095 | Ru2ZnGe | Ru | Zn | Ge | l21 | 1.471  | -0.116 | 6.033 | 0.639 | 0.001 | 0.000 | 0.000  | 0.000  | 0.000  | 0.000 | 22 |



|      |         |    |    |    |     |        |        |       |       |       |        |        |        |        |       |    |
|------|---------|----|----|----|-----|--------|--------|-------|-------|-------|--------|--------|--------|--------|-------|----|
| 1641 | Rh2CuB  | Rh | Cu | B  | l21 | 1.629  | 0.143  | 5.677 | 0.637 | 0.004 | 0.002  | 0.002  | 0.001  | 0.000  | 0.005 | 22 |
| 2900 | V2ZrPb  | V  | Zr | Pb | xa  | -0.075 | 0.284  | 6.701 | 0.632 | 0.273 | -1.306 | 1.861  | -0.434 | 0.009  | 0.130 | 18 |
| 616  | Fe2HfSn | Fe | Hf | Sn | l21 | 1.389  | -0.242 | 6.198 | 0.598 | 0.007 | 0.000  | 0.000  | 0.000  | 0.000  | 0.000 | 24 |
| 2043 | Ru2ScSb | Ru | Sc | Sb | l21 | 2.410  | -0.565 | 6.382 | 0.593 | 0.000 | 0.000  | 0.000  | 0.000  | 0.000  | 0.000 | 24 |
| 1605 | Rh2AuSn | Rh | Au | Sn | l21 | 0.935  | -0.240 | 6.403 | 0.590 | 0.002 | 0.000  | 0.000  | 0.000  | 0.000  | 0.000 | 23 |
| 1018 | Mn2WGe  | Mn | W  | Ge | l21 | 0.835  | -0.110 | 5.876 | 0.584 | 0.003 | 0.000  | 0.000  | 0.000  | 0.000  | 0.000 | 24 |
| 1057 | Ni2AgAl | Ni | Ag | Al | l21 | 0.251  | -0.178 | 5.936 | 0.568 | 0.000 | 0.000  | 0.000  | 0.000  | 0.000  | 0.000 | 24 |
| 1558 | Pd2YPb  | Pd | Y  | Pb | l21 | 0.838  | -0.697 | 6.887 | 0.564 | 0.000 | 0.000  | 0.000  | 0.000  | 0.000  | 0.000 | 27 |
| 1238 | Ni2RuGe | Ni | Ru | Ge | xa  | -0.757 | -0.092 | 5.833 | 0.561 | 0.000 | 0.000  | 0.000  | 0.000  | 0.000  | 0.000 | 32 |
| 744  | Fe2VIn  | Fe | V  | In | l21 | 0.698  | 0.132  | 5.968 | 0.558 | 0.065 | 1.214  | 1.214  | -0.831 | -0.072 | 1.525 | 24 |
| 1649 | Rh2CuSn | Rh | Cu | Sn | l21 | 1.094  | -0.344 | 6.201 | 0.552 | 0.000 | 0.000  | 0.000  | 0.000  | 0.000  | 0.000 | 23 |
| 1973 | Ru2NbGa | Ru | Nb | Ga | l21 | 2.203  | -0.476 | 6.203 | 0.551 | 0.007 | 0.000  | 0.000  | 0.000  | 0.000  | 0.000 | 24 |
| 1569 | Pd2ZnPb | Pd | Zn | Pb | l21 | 0.566  | -0.278 | 6.539 | 0.546 | 0.000 | 0.000  | 0.000  | 0.000  | 0.000  | 0.000 | 26 |
| 1180 | Ni2NbB  | Ni | Nb | B  | xa  | -0.623 | 0.016  | 5.666 | 0.541 | 0.000 | 0.000  | 0.002  | 0.000  | 0.000  | 0.002 | 28 |
| 1484 | Pd2PtSn | Pd | Pt | Sn | xa  | -0.139 | -0.412 | 6.415 | 0.540 | 0.000 | 0.000  | 0.000  | 0.000  | 0.000  | 0.000 | 34 |
| 1996 | Ru2PdGe | Ru | Pd | Ge | l21 | 0.568  | 0.044  | 6.113 | 0.533 | 0.000 | 0.000  | 0.000  | 0.000  | 0.000  | 0.000 | 30 |
| 1084 | Ni2CdGe | Ni | Cd | Ge | l21 | 0.815  | -0.001 | 6.068 | 0.523 | 0.000 | 0.000  | 0.000  | 0.000  | 0.000  | 0.000 | 26 |
| 1735 | Rh2PdSb | Rh | Pd | Sb | l21 | 0.524  | -0.247 | 6.320 | 0.517 | 0.001 | 0.000  | 0.000  | 0.000  | 0.000  | 0.000 | 33 |
| 1511 | Pd2ScGa | Pd | Sc | Ga | l21 | 0.792  | -0.868 | 6.380 | 0.499 | 0.000 | 0.000  | 0.000  | 0.000  | 0.000  | 0.000 | 26 |
| 1304 | Ni2ZnGe | Ni | Zn | Ge | l21 | 0.819  | -0.227 | 5.809 | 0.490 | 0.001 | 0.000  | 0.000  | 0.000  | 0.000  | 0.000 | 26 |
| 891  | Mn2IrSn | Mn | Ir | Sn | xa  | -0.730 | -0.132 | 6.290 | 0.480 | 0.348 | 3.520  | -3.260 | 0.051  | 0.036  | 0.347 | 27 |
| 1903 | Ru2CuAl | Ru | Cu | Al | l21 | 0.104  | -0.073 | 5.962 | 0.478 | 0.000 | 0.000  | 0.000  | 0.000  | 0.000  | 0.000 | 20 |
| 1446 | Pd2NbGe | Pd | Nb | Ge | xa  | -0.531 | -0.335 | 6.333 | 0.476 | 0.000 | 0.000  | 0.000  | 0.000  | 0.000  | 0.000 | 29 |
| 1406 | Pd2HfSi | Pd | Hf | Si | l21 | 0.381  | -0.638 | 6.358 | 0.474 | 0.000 | 0.000  | 0.000  | 0.000  | 0.000  | 0.000 | 28 |
| 1257 | Ni2TiB  | Ni | Ti | B  | l21 | 0.069  | -0.135 | 5.531 | 0.465 | 0.000 | 0.000  | 0.000  | 0.000  | 0.000  | 0.000 | 27 |
| 2202 | Sc2IrB  | Sc | Ir | B  | l21 | 0.578  | -0.337 | 6.304 | 0.456 | 0.002 | 0.000  | 0.000  | 0.000  | 0.000  | 0.000 | 18 |
| 2227 | Sc2MoGe | Sc | Mo | Ge | l21 | 0.629  | -0.242 | 6.620 | 0.454 | 0.004 | 0.001  | 0.001  | -0.002 | 0.000  | 0.000 | 16 |
| 724  | Fe2ScSb | Fe | Sc | Sb | l21 | 1.507  | -0.235 | 6.137 | 0.445 | 0.075 | 0.000  | 0.000  | 0.000  | 0.000  | 0.000 | 24 |
| 2614 | Ti2YPb  | Ti | Y  | Pb | xa  | -0.275 | 0.108  | 7.095 | 0.444 | 0.559 | 0.000  | 0.000  | 0.006  | 0.000  | 0.006 | 15 |





|      |         |    |    |    |     |        |        |       |       |       |       |       |        |       |       |    |
|------|---------|----|----|----|-----|--------|--------|-------|-------|-------|-------|-------|--------|-------|-------|----|
| 1377 | Pd2CuB  | Pd | Cu | B  | l21 | 1.039  | 0.215  | 5.775 | 0.117 | 0.000 | 0.000 | 0.000 | 0.000  | 0.000 | 0.000 | 24 |
| 1324 | Pd2AgBi | Pd | Ag | Bi | l21 | 0.371  | -0.202 | 6.669 | 0.115 | 0.000 | 0.000 | 0.000 | 0.000  | 0.000 | 0.000 | 26 |
| 1786 | Rh2TiGa | Rh | Ti | Ga | l21 | 1.823  | -0.846 | 6.120 | 0.114 | 0.000 | 0.000 | 0.000 | 0.000  | 0.000 | 0.000 | 25 |
| 2090 | Ru2ZnAl | Ru | Zn | Al | l21 | 0.749  | -0.222 | 6.022 | 0.113 | 0.000 | 0.000 | 0.000 | 0.000  | 0.000 | 0.000 | 21 |
| 742  | Fe2VGa  | Fe | V  | Ga | l21 | 1.254  | -0.307 | 5.708 | 0.111 | 0.001 | 0.000 | 0.000 | 0.000  | 0.000 | 0.000 | 24 |
| 1141 | Ni2HfPb | Ni | Hf | Pb | l21 | 1.280  | -0.186 | 6.357 | 0.109 | 0.000 | 0.000 | 0.000 | 0.000  | 0.000 | 0.000 | 28 |
| 652  | Fe2NbB  | Fe | Nb | B  | l21 | 0.325  | 0.097  | 5.623 | 0.099 | 0.003 | 0.000 | 0.000 | 0.000  | 0.000 | 0.000 | 24 |
| 1507 | Pd2ScAl | Pd | Sc | Al | l21 | 1.210  | -0.938 | 6.379 | 0.097 | 0.000 | 0.000 | 0.000 | 0.000  | 0.000 | 0.000 | 26 |
| 1959 | Ru2MoAs | Ru | Mo | As | xa  | -0.407 | 0.202  | 6.157 | 0.089 | 0.003 | 0.002 | 0.000 | 0.000  | 0.000 | 0.002 | 27 |
| 2048 | Ru2TiB  | Ru | Ti | B  | l21 | 1.873  | -0.173 | 5.811 | 0.085 | 0.000 | 0.000 | 0.000 | 0.000  | 0.000 | 0.000 | 23 |
| 2091 | Ru2ZnAs | Ru | Zn | As | l21 | 1.493  | -0.071 | 6.036 | 0.081 | 0.001 | 0.000 | 0.000 | 0.000  | 0.000 | 0.000 | 23 |
| 2050 | Ru2TiGa | Ru | Ti | Ga | l21 | 1.958  | -0.602 | 6.098 | 0.080 | 0.000 | 0.000 | 0.000 | 0.000  | 0.000 | 0.000 | 23 |
| 1589 | Rh2AgGe | Rh | Ag | Ge | l21 | 1.056  | -0.143 | 6.191 | 0.076 | 0.003 | 0.000 | 0.000 | 0.000  | 0.000 | 0.000 | 23 |
| 1112 | Ni2CuAl | Ni | Cu | Al | l21 | 0.285  | -0.370 | 5.698 | 0.075 | 0.001 | 0.001 | 0.001 | 0.000  | 0.000 | 0.002 | 24 |
| 737  | Fe2TiSn | Fe | Ti | Sn | l21 | 0.981  | -0.263 | 6.031 | 0.070 | 0.009 | 0.000 | 0.000 | 0.000  | 0.000 | 0.000 | 24 |
| 1971 | Ru2NbB  | Ru | Nb | B  | l21 | 1.680  | 0.077  | 5.963 | 0.067 | 0.001 | 0.000 | 0.000 | 0.000  | 0.000 | 0.000 | 24 |
| 2092 | Ru2ZnB  | Ru | Zn | B  | l21 | 1.291  | 0.330  | 5.728 | 0.062 | 0.000 | 0.002 | 0.002 | 0.000  | 0.000 | 0.004 | 21 |
| 1089 | Ni2CdSn | Ni | Cd | Sn | l21 | 1.043  | -0.053 | 6.261 | 0.060 | 0.000 | 0.000 | 0.000 | 0.000  | 0.000 | 0.000 | 26 |
| 1404 | Pd2HfPb | Pd | Hf | Pb | l21 | 0.724  | -0.459 | 6.693 | 0.059 | 0.001 | 0.000 | 0.000 | 0.000  | 0.000 | 0.000 | 28 |
| 1064 | Ni2AgPb | Ni | Ag | Pb | l21 | 0.583  | 0.202  | 6.278 | 0.056 | 0.005 | 0.001 | 0.001 | 0.000  | 0.000 | 0.002 | 25 |
| 2063 | Ru2VIn  | Ru | V  | In | l21 | 1.784  | -0.122 | 6.231 | 0.053 | 0.001 | 0.000 | 0.000 | 0.000  | 0.000 | 0.000 | 24 |
| 2106 | Ru2ZrGe | Ru | Zr | Ge | l21 | 2.314  | -0.595 | 6.281 | 0.040 | 0.002 | 0.000 | 0.000 | 0.000  | 0.000 | 0.000 | 24 |
| 654  | Fe2NbGa | Fe | Nb | Ga | l21 | 1.336  | -0.263 | 5.921 | 0.040 | 0.014 | 0.000 | 0.000 | 0.000  | 0.000 | 0.000 | 24 |
| 2232 | Sc2MoSn | Sc | Mo | Sn | l21 | 0.521  | -0.207 | 6.828 | 0.039 | 0.001 | 0.001 | 0.001 | -0.002 | 0.000 | 0.000 | 16 |
| 2351 | Sc2YSb  | Sc | Y  | Sb | xa  | -0.054 | -0.261 | 7.299 | 0.039 | 0.001 | 0.000 | 0.000 | 0.000  | 0.000 | 0.000 | 14 |
| 2057 | Ru2VAl  | Ru | V  | Al | l21 | 2.283  | -0.616 | 5.994 | 0.038 | 0.001 | 0.000 | 0.000 | 0.000  | 0.000 | 0.000 | 24 |
| 1264 | Ni2TiSi | Ni | Ti | Si | l21 | 0.637  | -0.623 | 5.785 | 0.029 | 0.000 | 0.000 | 0.000 | 0.000  | 0.000 | 0.000 | 28 |
| 1447 | Pd2NbIn | Pd | Nb | In | l21 | 0.524  | -0.334 | 6.520 | 0.027 | 0.000 | 0.000 | 0.000 | 0.000  | 0.000 | 0.000 | 28 |
| 2209 | Sc2IrSi | Sc | Ir | Si | l21 | 0.514  | -0.731 | 6.542 | 0.027 | 0.001 | 0.000 | 0.000 | 0.000  | 0.000 | 0.000 | 19 |
