# Supplementary material for: Orbital-engineered anomalous Hall conductivity in stable full Heusler compounds: a pathway to optimized spintronics
Source: Royal Society of Chemistry journal article supplement (doi:10.1039/d4tc02116a), 2024-01-01
Supplement: d4tc02116a2.pdf [file d4tc02116a2.pdf]

## **Orbital-Engineered Anomalous Hall Conductivity in Stable Full Heusler Compounds: A Pathway to Optimized Spintronics**

Quynh Anh T. Nguyen,<sup>1</sup> Thi H. Ho,<sup>2,3</sup> Seong-Gon Kim,<sup>4</sup> Ashwani Kumar,<sup>5</sup> and Viet Q. Bui<sup>1\*</sup>

<sup>1</sup>*Advanced Institute of Science and Technology, The University of Danang, 41 Le Duan, Danang, Vietnam*

<sup>2</sup>*Laboratory for Computational Physics, Institute for Computational Science and Artificial Intelligence, Van Lang University, Ho Chi Minh City, Vietnam*

<sup>3</sup>*Faculty of Mechanical - Electrical and Computer Engineering, School of Technology, Van Lang University, Ho Chi Minh City, Vietnam.*

<sup>4</sup>*Department of Physics & Astronomy and Center for Computational Sciences, Mississippi State University, Mississippi State, Mississippi 39762, United States*

<sup>5</sup>*Max-Planck-Institut für Kohlenforschung, 45470 Mülheim an der Ruhr, Germany*

\*Corresponding authors: Viet Q.Bui; Email: [bqviet@ac.udn.vn](mailto:bqviet@ac.udn.vn); [mrbuiquocviet@gmail.com](mailto:mrbuiquocviet@gmail.com)

Table S1. The Anomalous Hall Conductivity ( $|\sigma_{xy}|$ ) alongside the stability and magnetic characteristics for  $\text{Co}_2\text{MnZ}$  family. The table lists the stable phase, formation energy ( $\Delta F$  in eV/atom),  $|\sigma_{xy}|$  (S/Cm), total magnetic moment ( $M_{\text{tot}}$  in  $\mu_B$ ), spin polarization (P in %).

| $\text{Co}_2\text{MnZ}$  | Stable phase | $\Delta F$<br>eV/atom         | $ \sigma_{xy} $<br>S/Cm                            | $M_{\text{tot}}$<br>$\mu_B$                   | P<br>%                                   |
|--------------------------|--------------|-------------------------------|----------------------------------------------------|-----------------------------------------------|------------------------------------------|
| $\text{Co}_2\text{MnAl}$ | $I2_1$       | -0.385<br>-0.356 <sup>a</sup> | 1647<br>1631 <sup>b</sup> , 1600-2000 <sup>c</sup> | 4.14<br>4.04 <sup>b</sup> 4.01 <sup>f</sup>   | 63<br>68 <sup>e</sup>                    |
| $\text{Co}_2\text{MnGa}$ | $I2_1$       | -0.268<br>-2.237 <sup>a</sup> | 1046<br>845-1260 <sup>d</sup>                      | 4.09<br>4.11 <sup>b</sup> , 4.05 <sup>f</sup> | 73<br>66 <sup>e</sup> , 55 <sup>g</sup>  |
| $\text{Co}_2\text{MnB}$  | $I2_1$       | 0.017<br>0.032 <sup>a</sup>   | 447<br>598 <sup>b</sup> , 433 <sup>e</sup>         | 4.03                                          | 82                                       |
| $\text{Co}_2\text{MnIn}$ | $I2_1$       | 0.024<br>0.064 <sup>a</sup>   | 378                                                | 4.43<br>4.52 <sup>b</sup>                     | 27<br>31 <sup>e</sup>                    |
| $\text{Co}_2\text{MnGe}$ | $I2_1$       | -0.272<br>-0.257 <sup>a</sup> | 235<br>253 <sup>b</sup> , 228 <sup>e</sup>         | 4.99<br>5.00 <sup>b</sup> , 5.11 <sup>f</sup> | 99<br>100 <sup>e</sup> , 90 <sup>g</sup> |
| $\text{Co}_2\text{MnBi}$ | $I2_1$       | 0.222<br>0.227 <sup>a</sup>   | 218                                                | 5.92<br>5.07 <sup>f</sup>                     | 93                                       |
| $\text{Co}_2\text{MnSn}$ | $I2_1$       | -0.132<br>-0.139 <sup>a</sup> | 183<br>176 <sup>b</sup> , 174 <sup>e</sup>         | 5.00<br>5.04 <sup>b</sup> , 5.08 <sup>f</sup> | 77<br>75 <sup>e</sup>                    |
| $\text{Co}_2\text{MnAs}$ | $I2_1$       | -0.115<br>-0.129 <sup>a</sup> | 173<br>178 <sup>b</sup>                            | 5.62<br>5.98 <sup>b</sup> 4.90 <sup>g</sup>   | 33                                       |
| $\text{Co}_2\text{MnSi}$ | $I2_1$       | -0.467<br>-0.449 <sup>a</sup> | 172<br>187 <sup>b</sup> , 193 <sup>e</sup>         | 5.03<br>5.00 <sup>b</sup>                     | 1<br>100 <sup>e</sup> , 93 <sup>g</sup>  |
| $\text{Co}_2\text{MnPb}$ | $I2_1$       | 0.217<br>0.240 <sup>a</sup>   | 31                                                 | 5.06                                          | 65                                       |
| $\text{Co}_2\text{MnSb}$ | $I2_1$       | -0.104<br>-0.094 <sup>a</sup> | 25                                                 | 5.95<br>5.96 <sup>b</sup> 4.9 <sup>f</sup>    | 100                                      |

<sup>a</sup> Theoretical data<sup>1</sup>

<sup>b</sup> Theoretical data<sup>2</sup>

<sup>c</sup> Experiment data<sup>3</sup>

<sup>d</sup> Experiment data<sup>4</sup>

<sup>e</sup> Theoretical data<sup>5</sup>

<sup>f</sup> Experiment data<sup>6</sup>

<sup>g</sup> Experiment data<sup>7</sup>

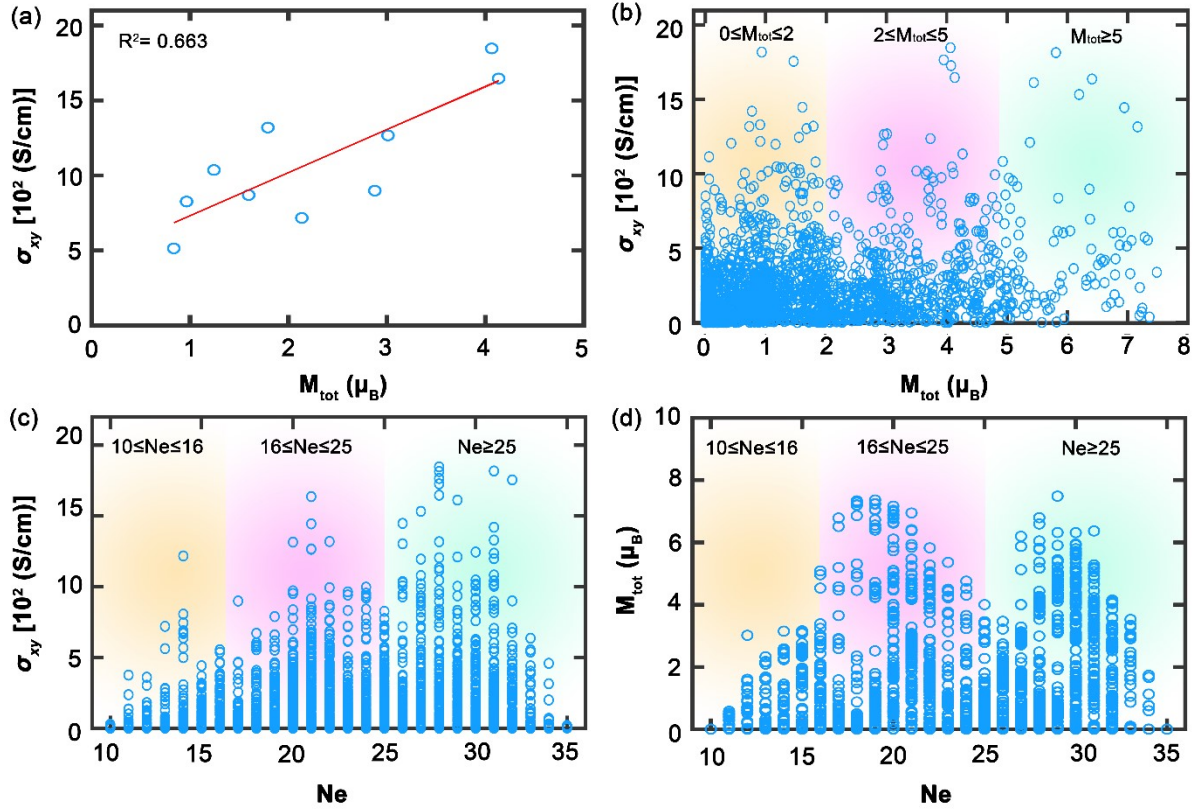

**Figure S1.** Anomalous Hall conductivity  $\sigma_{xy}$  as a function of total magnetic moment  $M_{\text{tot}}$  for data in (a) table 1 and (b) whole data. Yellow, purple, and cyan backgrounds distinguish three areas  $0 \leq M_{\text{tot}} \leq 2$ ,  $2 \leq M_{\text{tot}} \leq 5$ , and  $M_{\text{tot}} \geq 5$ , respectively. (c)  $\sigma_{xy}$  and (d)  $M_{\text{tot}}$  as a function of total valence electrons  $Ne$ . Yellow, purple, and cyan backgrounds distinguish three areas  $10 \leq Ne \leq 16$ ,  $16 \leq Ne \leq 25$ , and  $Ne \geq 25$ , respectively.

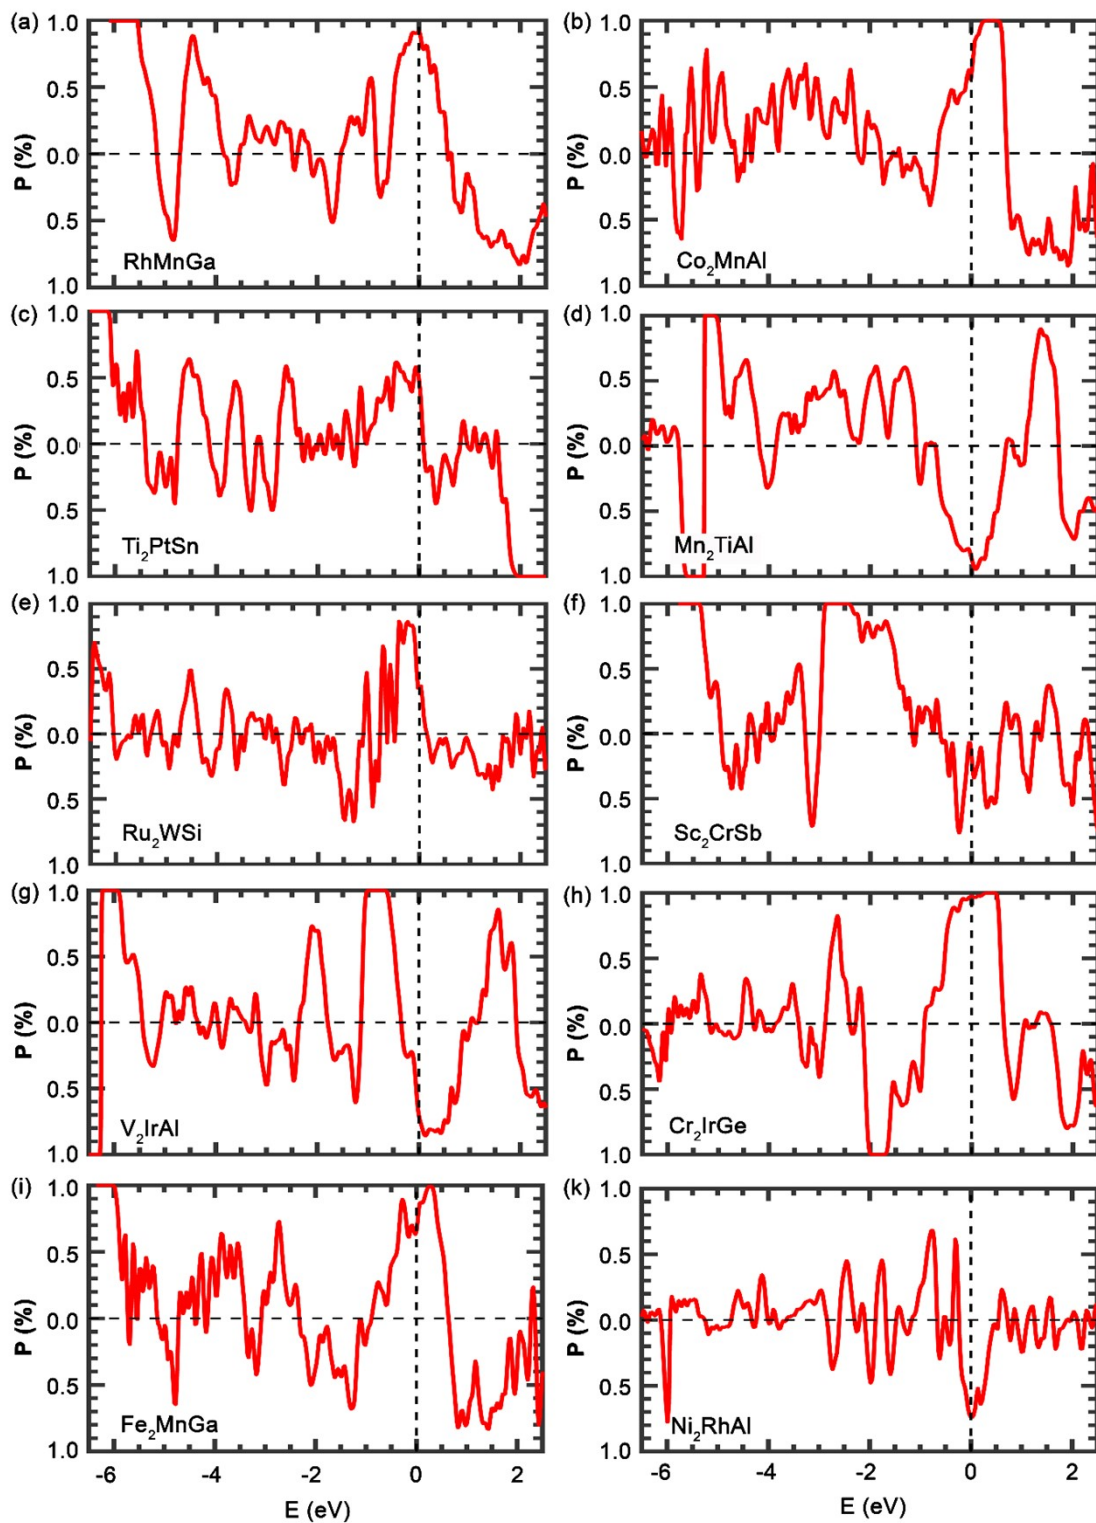

**Figure S2.** Spin polarization  $P$  (%) as the function of energy. for selected compounds (a)  $\text{Rh}_2\text{MnGa}$ , (b)  $\text{Co}_2\text{MnAl}$ , (c)  $\text{Ti}_2\text{PtSn}$ , (d)  $\text{Mn}_2\text{TiAl}$ , (e)  $\text{Ru}_2\text{WSi}$ , (f)  $\text{Sc}_2\text{CrSb}$ , (g)  $\text{V}_2\text{IrAl}$ , (h)  $\text{Cr}_2\text{IrGe}$ , (i)  $\text{Fe}_2\text{MnGa}$ , and (k)  $\text{Ni}_2\text{RhAl}$ .  $E_F$  is set to zero.

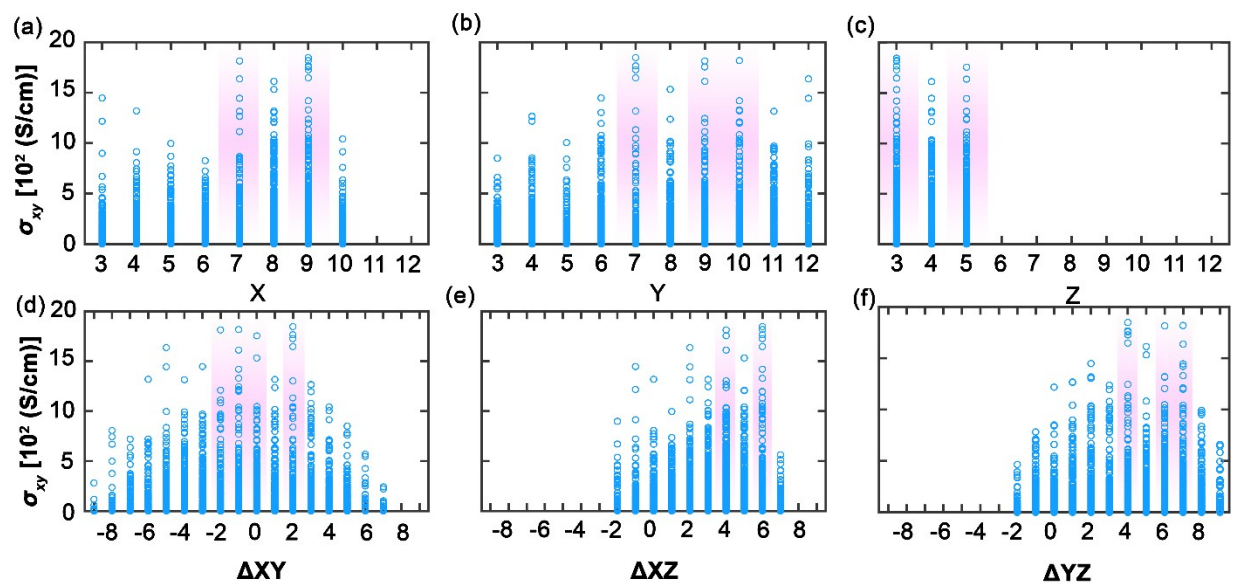

**Figure S3.** Anomalous Hall conductivity ( $\sigma_{xy}$ ) as a function of valence electrons for (a) X, (b) Y, and (c) Z elements.  $\sigma_{xy}$  as a function of valence electron differences between (d) X and Y ( $\Delta XY$ ), (e) X and Z ( $\Delta XZ$ ), and (f) Y and Z ( $\Delta YZ$ ). Purple backgrounds distinguish areas exhibiting large  $\sigma_{xy}$ .

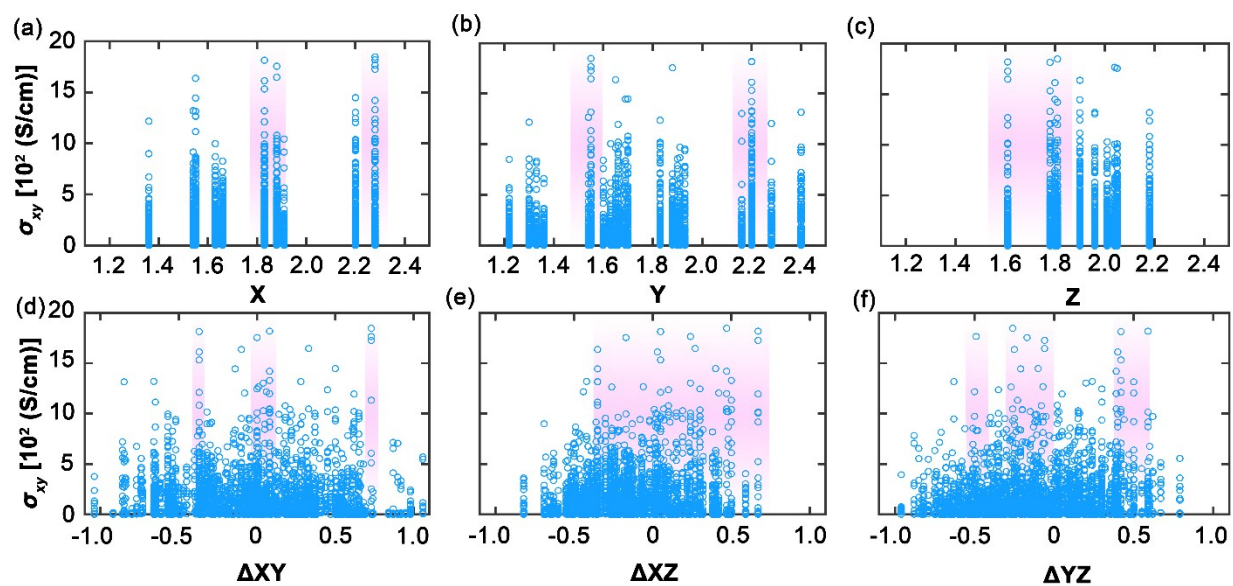

**Figure S4.** Anomalous Hall conductivity ( $\sigma_{xy}$ ) as a function of electronegativity for (a) X, (b) Y, and (c) Z elements.  $\sigma_{xy}$  as a function of electronegativity differences between (d) X and Y ( $\Delta XY$ ), (e) X and Z ( $\Delta XZ$ ), and (f) Y and Z ( $\Delta YZ$ ). Purple backgrounds distinguish areas exhibiting large  $\sigma_{xy}$ .



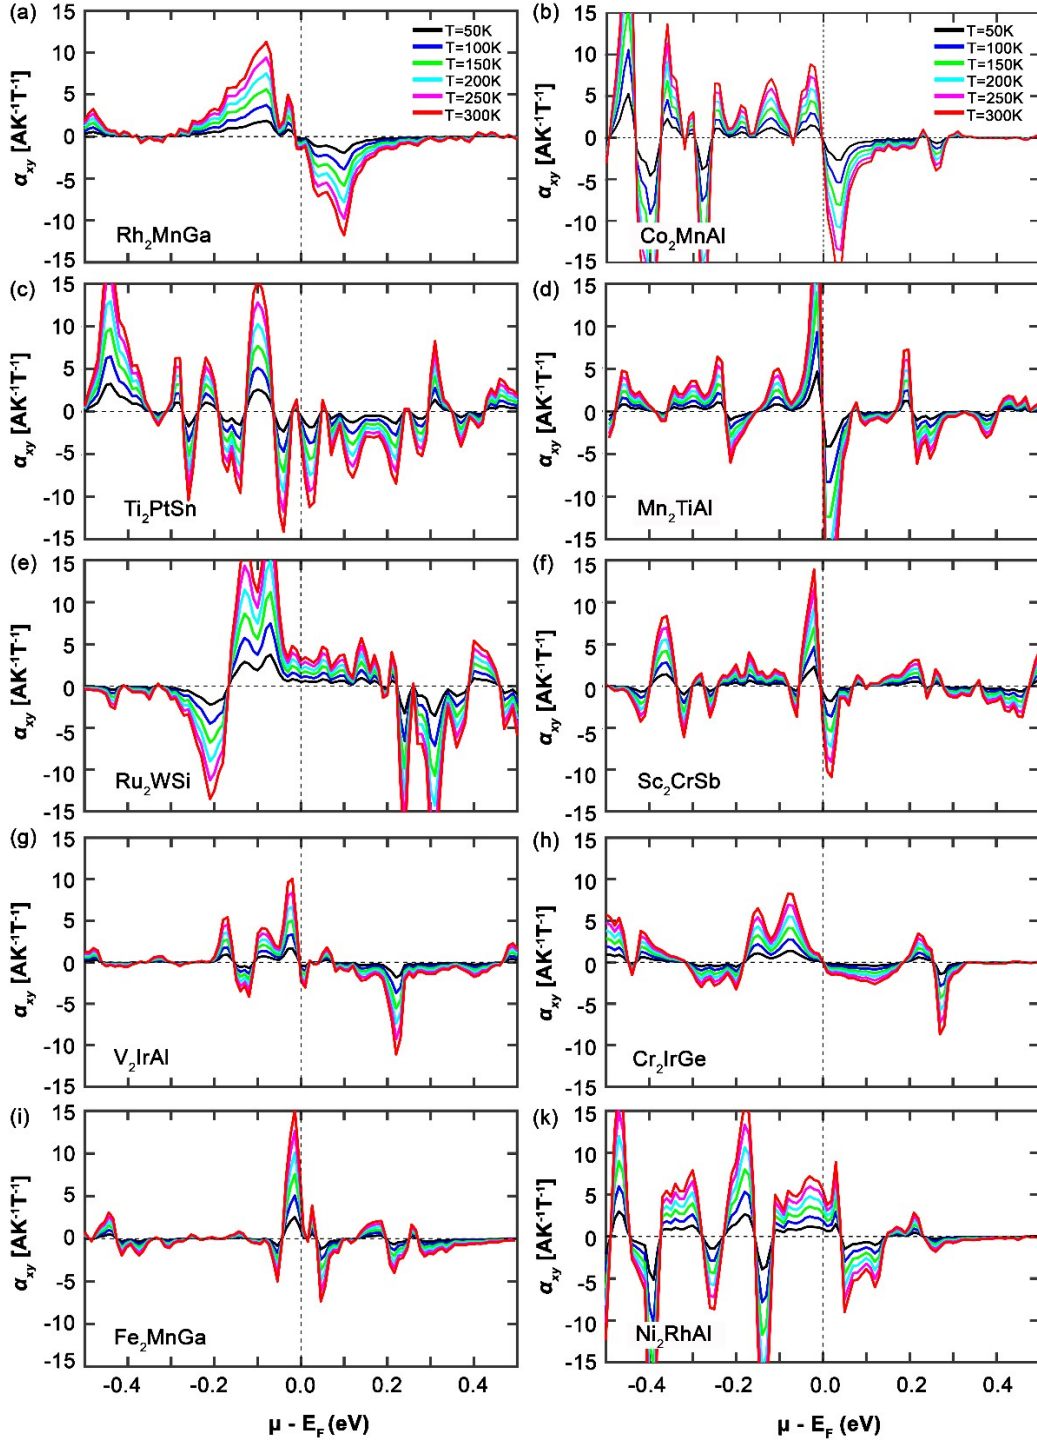

**Figure S5.** Anomalous Nernst conductivity ( $\alpha_{xy}$ ) as a function of chemical potential  $\mu$  for selected compounds (a)  $\text{Rh}_2\text{MnGa}$ , (b)  $\text{Co}_2\text{MnAl}$ , (c)  $\text{Ti}_2\text{PtSn}$ , (d)  $\text{Mn}_2\text{TiAl}$ , (e)  $\text{Ru}_2\text{WSi}$ , (f)  $\text{Sc}_2\text{CrSb}$ , (g)  $\text{V}_2\text{IrAl}$ , (h)  $\text{Cr}_2\text{IrGe}$ , (i)  $\text{Fe}_2\text{MnGa}$ , and (k)  $\text{Ni}_2\text{RhAl}$ .  $E_F$  is set to zero.

## References

1. S. Kirklin, J. E. Saal, B. Meredig, A. Thompson, J. W. Doak, M. Aykol, S. Rühl, and C. Wolverton, *npj Npj Comput. Mater.*, 2015, **1**, 1.
2. J. Noky, Y. Zhang, J. Gooth, C. Felser, and Y. Sun, *npj Npj Comput. Mater.*, 2020 **6**, 77.
3. E. Vilanova Vidal, G. Stryganyuk, H. Schneider, C. Felser, and G. Jakob, *Appl. Phys. Lett.*, 2011, **99**.
4. S. N. Guin *et al.*, *NPG Asia Mater.*, 2019, **11**, 16.
5. J.-C. Tung and G.-Y. Guo, *New J. Phys.*, 2013, **15**, 033014.
6. P. Webster, *J. Phys. Chem. Solids*, 1971, **32**, 1221.
7. C. Guillemard, S. Petit-Watelot, J.-C. Rojas-Sánchez, J. Hohlfeld, J. Ghanbaja, A. Bataille, P. Le Fèvre, F. Bertran, and S. Andrieu, *Appl. Phys. Lett.* 2019, **115**, 12401.
